# Supplementary material for: Discovery and characterization of Hv1-type proton channels in reef-building corals
Source: eLife. 2021 Aug 6;10:e69248. doi: 10.7554/eLife.69248 (PMC8346283; doi:10.7554/eLife.69248)
Supplement: Figure 3—source data 1. [file elife-69248-fig3-data1.xlsx]

## Sheet: Figure 3 Source data
Figure 3a Source data										Figure 3B
human Hv1 c-terminus					Acropira millepora Hv1 c-terminus					FRET apparent efficiency		Donor intensity/acceptor intensity			FRET app standar error of the mean
sequence position		Coil probability			sequence position		Coil probability
										0.0575068		0.117103			0.0167802
G	Window 14	Window 21	Window 28		G	Window 14	Window 21	Window 28		0.136573		0.303987			0.0138976
I	0	0	0		I	0	0	0		0.198225		0.503108			0.0287689
I	0.001	0.006	0.001		I	0.002	0.006	0.095		0.158641		0.683314			0.0159673
I	0.001	0.006	0.001		L	0.002	0.006	0.095		0.205917		0.897103			0.0208954
S	0.003	0.006	0.001		S	0.002	0.008	0.095		0.194949		1.09451			0.0193378
V	0.003	0.006	0.001		V	0.002	0.008	0.095		0.205558		1.30404			0.0584454
K	0.108	0.255	0.264		Q	0.095	0.985	1		0.234653		1.45566			0.0543715
T	0.108	0.255	0.264		M	0.095	0.985	1		0.315462		1.67373			0.0242722
R	0.108	0.255	0.264		R	0.095	0.985	1		0.217723		1.89909			0.0045583
S	0.108	0.255	0.264		A	0.095	0.985	1
E	0.108	0.255	0.264		E	0.095	0.985	1
R	0.108	0.255	0.264		K	0.095	0.985	1
Q	0.108	0.255	0.264		K	0.095	0.985	1
L	0.108	0.255	0.696		V	0.922	1	1
L	0.108	0.255	0.696		Q	0.922	1	1
R	0.108	0.255	0.696		A	0.922	1	1
L	0.108	0.255	0.696		V	0.922	1	1
K	0.108	0.255	0.696		M	0.922	1	1
Q	0.108	0.255	0.696		K	0.922	1	1
M	0.108	0.255	0.696		E	0.922	1	1
N	0.052	0.255	0.967		N	1	1	1
V	0.052	0.255	0.967		A	1	1	1
Q	0.052	0.255	0.967		E	1	1	1
L	0.052	0.255	0.967		L	1	1	1
A	0.052	0.255	0.967		Q	1	1	1
A	0.052	0.255	0.967		K	1	1	1
K	0.052	0.255	0.967		E	1	1	1
I	0.074	0.87	0.967		L	1	1	1
Q	0.074	0.87	0.967		E	1	1	1
H	0.074	0.87	0.967		Q	1	1	1
L	0.074	0.87	0.967		L	1	1	1
E	0.074	0.87	0.967		K	1	1	1
F	0.074	0.87	0.967		S	1	1	1
S	0.074	0.87	0.967		K	1	1	1
C	0.926	0.87	0.967		C	0.999	1	1
S	0.926	0.87	0.967		A	0.999	1	1
E	0.926	0.87	0.967		Q	0.999	1	1
K	0.926	0.87	0.967		L	0.999	1	1
E	0.926	0.87	0.967		E	0.999	1	1
Q	0.926	0.87	0.967		S	0.999	1	1
E	0.926	0.87	0.967		E	0.999	1	1
I	0.926	0.87	0.967		L	0.712	1	1
E	0.926	0.87	0.967		T	0.712	1	1
R	0.926	0.87	0.967		T	0.712	1	1
L	0.926	0.87	0.967		L	0.712	1	1
N	0.926	0.87	0.967		K	0.712	1	1
K	0.926	0.87	0.967		Q	0.712	1	1
L	0.926	0.87	0.967		S	0.712	1	1
L	0.681	0.344	0.358
R	0.681	0.344	0.358
Q	0.681	0.344	0.358
H	0.028	0.344	0.358
G	0.017	0.344	0.358
L	0.017	0.344	0.358
L	0.017	0.344	0.358
G	0.001	0.007	0.001
E	0.001	0.007	0.001
V	0.001	0.007	0.001
N	0	0	0
