# Supplementary material for: Discovery and characterization of Hv1-type proton channels in reef-building corals
Source: eLife. 2021 Aug 6;10:e69248. doi: 10.7554/eLife.69248 (PMC8346283; doi:10.7554/eLife.69248)
Supplement: Figure 4—source data 1. [file elife-69248-fig4-data1.xlsx]

## Sheet: Figure 4 Source data
Figure 4B										Figure 4C
	Erev (mV)				Calculated reversal potential (dotted line)					Mean conductance		mV	S.E.M.
DeltapH	-1	1	2	0
	52.169	-60.8281	-127.556	-10.4651	Delta pH	Erev				0.002333		-50	0.0607629
	53.5577	-59.6643	-126.204	-5.32896	-2	118.31				0.001873		-40	0.0329967
	54.7839	-57.832	-125.567	2.85083	-1	59.16				6.94043e-05		-30	0.0236888
	56.4743	-56.3123	-123.3	3.65212	0	0				0.0480363		-20	0.015778
	63.3718	-55.5833	-122.231	5.68021	1	-59.16				0.174057		-10	0.0247741
	63.6523	-54.683	-116.374	10.8429	2	-118.31				0.36352		0	0.0354458
	72.0217	-51.2654	-113.388							0.5551		10	0.0337389
		-48.9894	-108.103							0.715355		20	0.0259596
										0.825236		30	0.0214601
										0.905117		40	0.0152843
										0.961428		50	0.00872868
										1		60	0
Figure 4 D
Mean delay	Mean tau	SEM delay	SEM tau	Voltage (mV)
35.914	439.423	21.0789	94.3594	-10
51.472	352.17	22.6509	51.553	0
77.802	220.913	6.24136	31.6199	10
65.076	171.878	3.26866	22.0968	20
55.936	135.989	4.66643	11.5405	30
45.532	115.454	5.31802	6.40276	40
37.354	99.8054	5.37599	3.44421	50
32.162	87.1387	6.00906	3.37914	60
