# Supplementary material for: Discovery and characterization of Hv1-type proton channels in reef-building corals
Source: eLife. 2021 Aug 6;10:e69248. doi: 10.7554/eLife.69248 (PMC8346283; doi:10.7554/eLife.69248)
Supplement: Figure 5—source data 1. [file elife-69248-fig5-data1.xlsx]

## Sheet: Figure 5 Source data
Figure 5A	Acropora Hv1 currents (amps)													Figure 5C Human Hv1 currents (amps)														Figure 5E			SHORT PULSES											LONG PULSES
trace number														trace number															Acropora conductance vs. voltage					Human conductance vs. voltage					Acropora conductance vs. voltage					Human conductance vs. voltage
1	2	3	4	5	6	7	8	9	10	11	12	13		1	2	3	4	5	6	7	8	9	10	11	12	13		Voltage (mV)	Mean Conductance		SEM of conductance		Voltage (mV)	Mean Conductance		SEM of conductance
-7.59375e-11	-5.875e-11	-6.375e-11	-6.4375e-11	-5.625e-11	-5.90625e-11	-5.40625e-11	-6.15625e-11	-5.6875e-11	-5.34375e-11	-6.125e-11	-6.8125e-11	-6.4375e-11		-4.1875e-11	-4.40625e-11	-4.1875e-11	-4.3125e-11	-4.375e-11	-3.84375e-11	-4.40625e-11	-4.5e-11	-4.03125e-11	-4.09375e-11	-4.03125e-11	-3.75e-11	-3.71875e-11		-100	0.00155025		0.00051314		-100	-0.000217442		0.000615442		Voltage (mV)	Mean Conductance		SEM of conductance			Voltage (mV)	Mean Conductance		SEM of conductance
-7.875e-11	-5.78125e-11	-6.84375e-11	-5.15625e-11	-5.90625e-11	-6.09375e-11	-6.0625e-11	-6.5e-11	-6.4375e-11	-5.96875e-11	-6.5e-11	-6.15625e-11	-5.53125e-11		-4.46875e-11	-4.25e-11	-3.59375e-11	-4.78125e-11	-4.09375e-11	-3.71875e-11	-4.03125e-11	-4.21875e-11	-3.90625e-11	-3.53125e-11	-4.28125e-11	-3.21875e-11	-4.125e-11		-80	-0.0037755		0.00171113		-80	0.00203539		0.00161433		-60	0.00563617		0.0193004			-100	-0.0105927		0.0196388
-7.65625e-11	-6.03125e-11	-6.5e-11	-5.71875e-11	-5.8125e-11	-5.59375e-11	-5.875e-11	-6.1875e-11	-5.65625e-11	-4.96875e-11	-6.15625e-11	-6.375e-11	-5.96875e-11		-4.34375e-11	-4.46875e-11	-4.28125e-11	-4.34375e-11	-3.84375e-11	-4.03125e-11	-3.78125e-11	-4.03125e-11	-3.90625e-11	-4.15625e-11	-4.3125e-11	-2.90625e-11	-4.03125e-11		-60	-0.0132192		0.0385743		-60	-0.0694097		0.0254344		-50	0.0013582		0.00377662			-80	-0.0279869		0.0184615
-8.0625e-11	-6.28125e-11	-6.65625e-11	-5.6875e-11	-5.78125e-11	-6.21875e-11	-5.0625e-11	-5.53125e-11	-7e-11	-5.59375e-11	-6.25e-11	-6.125e-11	-5.65625e-11		-4.4375e-11	-4.625e-11	-4.5e-11	-4.4375e-11	-4.09375e-11	-4.1875e-11	-4.53125e-11	-4.09375e-11	-3.5e-11	-3.5e-11	-4.1875e-11	-3.375e-11	-3.78125e-11		-50	0.00159138		0.00565773		-40	-0.00154276		0.00108589		-40	-0.00056277		0.00107865			-60
-7.5625e-11	-6e-11	-6.46875e-11	-6.15625e-11	-6.1875e-11	-6.4375e-11	-5.90625e-11	-6e-11	-7.0625e-11	-5.3125e-11	-6.4375e-11	-6.21875e-11	-5.90625e-11		-4.4375e-11	-4.21875e-11	-3.65625e-11	-3.5625e-11	-4.34375e-11	-4.28125e-11	-4.25e-11	-4.4375e-11	-4.5e-11	-3.6875e-11	-3.78125e-11	-3.8125e-11	-3.65625e-11		-40	0.000710767		0.00256112		-20	0.00963199		0.0078011		-30	0.0147529		0.00706947			-40	-0.0139256		0.00964562
-7.84375e-11	-6.5e-11	-5.96875e-11	-5.65625e-11	-6.09375e-11	-5.90625e-11	-5.9375e-11	-6.21875e-11	-6.4375e-11	-6.21875e-11	-6.4375e-11	-7.15625e-11	-5.125e-11		-4.34375e-11	-4.25e-11	-4.375e-11	-4.09375e-11	-4.46875e-11	-4.34375e-11	-4.03125e-11	-4.53125e-11	-4.09375e-11	-3.78125e-11	-3.84375e-11	-3.53125e-11	-3.625e-11		-30	0.0152798		0.0105846		0	0.0629835		0.0349384		-20	0.0834829		0.0266622			-20	-0.00127316		0.00196293
-7e-11	-6.34375e-11	-7.03125e-11	-5.84375e-11	-6.15625e-11	-5.96875e-11	-5.96875e-11	-6.5e-11	-5.84375e-11	-5.65625e-11	-6.40625e-11	-6.5e-11	-5.28125e-11		-4.375e-11	-4.40625e-11	-4.5625e-11	-4.1875e-11	-4.34375e-11	-4.4375e-11	-4.09375e-11	-4.09375e-11	-4.03125e-11	-4.1875e-11	-3.96875e-11	-3.46875e-11	-4.03125e-11		-20	0.0383545		0.0182523		20	0.187692		0.0662281		-10	0.231036		0.0440734			0	0.0891314		0.0347204
-7.5625e-11	-6.03125e-11	-6.65625e-11	-5.40625e-11	-6e-11	-6.78125e-11	-6.0625e-11	-6.875e-11	-6.4375e-11	-5.6875e-11	-5.9375e-11	-5.65625e-11	-5.96875e-11		-4.4375e-11	-4.15625e-11	-4.84375e-11	-3.96875e-11	-4.03125e-11	-4.5e-11	-4.53125e-11	-4.3125e-11	-3.65625e-11	-4.84375e-11	-4.3125e-11	-4.0625e-11	-4.21875e-11		-10	0.218245		0.0642272		40	0.379638		0.0723611		0	0.403193		0.0478223			20	0.328766		0.100063
-8.34375e-11	-6.71875e-11	-6.1875e-11	-5.4375e-11	-5.40625e-11	-6.53125e-11	-5.875e-11	-6.15625e-11	-6.4375e-11	-5.6875e-11	-6.6875e-11	-6.09375e-11	-6e-11		-4.125e-11	-4.03125e-11	-4.125e-11	-4.34375e-11	-4.65625e-11	-4.03125e-11	-4.6875e-11	-4.28125e-11	-4.21875e-11	-4.4375e-11	-3.9375e-11	-4.34375e-11	-3.78125e-11		0	0.280619		0.0402035		60	0.58114		0.0583761		10	0.553896		0.0466677			40	0.585464		0.110228
-7.65625e-11	-6.40625e-11	-6.65625e-11	-5.15625e-11	-5.40625e-11	-6.25e-11	-5.71875e-11	-6.46875e-11	-6.8125e-11	-6.21875e-11	-6.625e-11	-6.3125e-11	-6.09375e-11		-4.15625e-11	-3.90625e-11	-4.15625e-11	-4.375e-11	-4.21875e-11	-4.21875e-11	-4.25e-11	-4.09375e-11	-4.28125e-11	-3.875e-11	-4.03125e-11	-4.5e-11	-4.03125e-11		10	0.521846		0.0579605		80	0.743867		0.0414047		20	0.673712		0.0441566			60	0.785208		0.0823683
-7.5e-11	-6e-11	-6.90625e-11	-6.46875e-11	-5.5625e-11	-6.5e-11	-6.03125e-11	-6.09375e-11	-6.65625e-11	-5.5e-11	-6.09375e-11	-6.03125e-11	-6.375e-11		-3.8125e-11	-4.28125e-11	-3.65625e-11	-4.0625e-11	-4.03125e-11	-3.90625e-11	-4.34375e-11	-4.34375e-11	-4.65625e-11	-3.625e-11	-4.03125e-11	-3.65625e-11	-4.0625e-11		20	0.595426		0.039276		100	0.860181		0.0283124		30	0.76667		0.0423544			80	0.89905		0.0505833
-7.1875e-11	-6.34375e-11	-6.6875e-11	-5.78125e-11	-6.03125e-11	-5.78125e-11	-5.5e-11	-5.9375e-11	-6.21875e-11	-6.15625e-11	-6.03125e-11	-6.96875e-11	-5.28125e-11		-4.28125e-11	-4.15625e-11	-4.34375e-11	-4e-11	-4.28125e-11	-3.90625e-11	-4.34375e-11	-3.90625e-11	-4.78125e-11	-4.15625e-11	-3.5e-11	-3.90625e-11	-3.96875e-11		30	0.725782		0.0390966		120	0.942276		0.0155801		40	0.837742		0.0391386			100	0.962766		0.0202668
-7.53125e-11	-6.96875e-11	-6.75e-11	-5.4375e-11	-6.25e-11	-6.21875e-11	-5.21875e-11	-6.9375e-11	-6.6875e-11	-5.65625e-11	-6.40625e-11	-6.09375e-11	-5.78125e-11		-4.46875e-11	-4.5e-11	-4.59375e-11	-3.59375e-11	-4.25e-11	-4.59375e-11	-4.375e-11	-3.9375e-11	-4.03125e-11	-4.1875e-11	-4.03125e-11	-4e-11	-3.625e-11		40	0.79051		0.0345525		140	1		5.49528e-07		50	0.892836		0.0353004			120	0.983559		0.0128008
-8.25e-11	-6.375e-11	-6.09375e-11	-5.5e-11	-6.5e-11	-6.15625e-11	-5.6875e-11	-6.4375e-11	-6.78125e-11	-5e-11	-6.96875e-11	-6.5625e-11	-5.84375e-11		-4.5e-11	-4.78125e-11	-4.5625e-11	-3.28125e-11	-3.59375e-11	-4.40625e-11	-3.90625e-11	-3.65625e-11	-4.1875e-11	-3.84375e-11	-3.96875e-11	-3.5625e-11	-3.84375e-11		50	0.854561		0.0246236							60	0.93456		0.0299096			140	1		0
-7.75e-11	-5.84375e-11	-6.125e-11	-5.28125e-11	-6.15625e-11	-5.78125e-11	-5.1875e-11	-6.6875e-11	-7.03125e-11	-6.125e-11	-6.84375e-11	-6.59375e-11	-6.25e-11		-4.28125e-11	-4.46875e-11	-4.1875e-11	-3.9375e-11	-3.40625e-11	-4.46875e-11	-3.875e-11	-4.0625e-11	-3.8125e-11	-3.78125e-11	-3.78125e-11	-3.5e-11	-3.71875e-11		60	0.89352		0.0252158							70	0.958		0.0195699
-7.59375e-11	-6.5e-11	-6.65625e-11	-6.03125e-11	-5.6875e-11	-6.875e-11	-6.125e-11	-6.5625e-11	-6.46875e-11	-5.8125e-11	-6.03125e-11	-6.75e-11	-6.15625e-11		-4.53125e-11	-4.40625e-11	-4.34375e-11	-4.5e-11	-3.8125e-11	-4.4375e-11	-4.09375e-11	-4.59375e-11	-3.84375e-11	-3.96875e-11	-3.84375e-11	-3.84375e-11	-3.65625e-11		70	0.937001		0.0141496							80	0.976304		0.0111939
-7.5625e-11	-5.78125e-11	-6.21875e-11	-5.96875e-11	-6.09375e-11	-6.03125e-11	-5.84375e-11	-5.84375e-11	-6.65625e-11	-5.96875e-11	-7.21875e-11	-7.09375e-11	-5.65625e-11		-4.0625e-11	-4.65625e-11	-4.21875e-11	-4.3125e-11	-4.09375e-11	-4.375e-11	-4.03125e-11	-4.25e-11	-4.03125e-11	-3.9375e-11	-4.28125e-11	-3.5625e-11	-3.8125e-11		80	0.949461		0.0162184							90	0.991786		0.00456928
-7.3125e-11	-6.84375e-11	-6.1875e-11	-5.96875e-11	-5.5625e-11	-6.96875e-11	-5.71875e-11	-6.21875e-11	-6.40625e-11	-5.84375e-11	-6.90625e-11	-6.84375e-11	-6.09375e-11		-4.875e-11	-4.375e-11	-3.8125e-11	-4.3125e-11	-4.34375e-11	-4.46875e-11	-4.0625e-11	-3.90625e-11	-3.84375e-11	-4.125e-11	-3.5e-11	-4.03125e-11	-3.46875e-11		90	0.987679		0.00465559							100	1		4.41593e-07
-8.09375e-11	-6.09375e-11	-6.46875e-11	-5.4375e-11	-5.34375e-11	-5.5625e-11	-5.46875e-11	-6.15625e-11	-6.5625e-11	-5.8125e-11	-6.03125e-11	-7.28125e-11	-5.46875e-11		-5.25e-11	-4.375e-11	-3.46875e-11	-4.21875e-11	-4.28125e-11	-3.75e-11	-4.03125e-11	-3.8125e-11	-3.28125e-11	-3.59375e-11	-3.25e-11	-3.6875e-11	-3.6875e-11		100	0.978569		0.0080519
-7.875e-11	-6.3125e-11	-6.1875e-11	-5.78125e-11	-6.59375e-11	-6.5e-11	-6.15625e-11	-6.875e-11	-6.53125e-11	-6.21875e-11	-6.78125e-11	-6.375e-11	-6.28125e-11		-4.53125e-11	-4.03125e-11	-4.21875e-11	-4.1875e-11	-4.5e-11	-3.6875e-11	-3.5625e-11	-4.28125e-11	-3.75e-11	-3.9375e-11	-3.59375e-11	-3.875e-11	-4.03125e-11		120	0.982625		0.00894819
-7.84375e-11	-6.65625e-11	-6.75e-11	-5.96875e-11	-6.15625e-11	-5.8125e-11	-5.1875e-11	-6.3125e-11	-6.1875e-11	-6.0625e-11	-6.21875e-11	-6.8125e-11	-5.78125e-11		-4.53125e-11	-3.53125e-11	-4.78125e-11	-4.1875e-11	-4.5e-11	-3.5e-11	-4.09375e-11	-4.6875e-11	-3.90625e-11	-3.6875e-11	-4.0625e-11	-3.78125e-11	-3.6875e-11		140	0.969325		0.0250458
-7.34375e-11	-6.5625e-11	-6.34375e-11	-5.5e-11	-5.9375e-11	-5.96875e-11	-5.875e-11	-6.46875e-11	-6.25e-11	-6.28125e-11	-6.90625e-11	-6.78125e-11	-6.1875e-11		-4.5625e-11	-3.90625e-11	-4.03125e-11	-4.4375e-11	-4.03125e-11	-4.03125e-11	-4.21875e-11	-4.28125e-11	-3.96875e-11	-3.84375e-11	-4.5e-11	-3.5e-11	-3.875e-11
-7.625e-11	-6.28125e-11	-6.78125e-11	-6.03125e-11	-5.5625e-11	-6.6875e-11	-5.34375e-11	-6.5e-11	-6.71875e-11	-5.65625e-11	-6.21875e-11	-6.53125e-11	-5.59375e-11		-4.75e-11	-4.0625e-11	-3.8125e-11	-4.46875e-11	-4.09375e-11	-3.96875e-11	-4.21875e-11	-4.46875e-11	-3.6875e-11	-4.21875e-11	-3.90625e-11	-3.6875e-11	-3.75e-11
-8.03125e-11	-6.6875e-11	-6.59375e-11	-5.625e-11	-4.96875e-11	-6.4375e-11	-5.8125e-11	-6.375e-11	-6.25e-11	-5.84375e-11	-5.71875e-11	-6e-11	-4.9375e-11		-4.71875e-11	-4.28125e-11	-4.03125e-11	-4.46875e-11	-3.84375e-11	-4.03125e-11	-4.53125e-11	-4.15625e-11	-3.3125e-11	-3.75e-11	-3.84375e-11	-3.65625e-11	-3.6875e-11
-7.71875e-11	-6.4375e-11	-6.5e-11	-5.59375e-11	-6.28125e-11	-5.5e-11	-4.6875e-11	-6.1875e-11	-6.28125e-11	-5.71875e-11	-5.75e-11	-6.4375e-11	-5.71875e-11		-4.46875e-11	-4.21875e-11	-4.09375e-11	-4.25e-11	-4.34375e-11	-3.59375e-11	-4.15625e-11	-4.65625e-11	-3.84375e-11	-3.8125e-11	-4.03125e-11	-3.4375e-11	-3.6875e-11
-7.28125e-11	-6e-11	-7.15625e-11	-5.5625e-11	-6.125e-11	-5.5e-11	-5.34375e-11	-6.375e-11	-6.6875e-11	-5.75e-11	-6.6875e-11	-6.15625e-11	-5.78125e-11		-4.84375e-11	-4.09375e-11	-4.03125e-11	-4.03125e-11	-4.53125e-11	-4.375e-11	-3.96875e-11	-4.65625e-11	-4.09375e-11	-4.3125e-11	-4.15625e-11	-3.25e-11	-4.1875e-11
-7.6875e-11	-6.40625e-11	-6.5e-11	-5.6875e-11	-5.8125e-11	-6.34375e-11	-5.6875e-11	-5.5e-11	-6.625e-11	-5.8125e-11	-6.9375e-11	-6.875e-11	-5.65625e-11		-4.78125e-11	-4.03125e-11	-4.40625e-11	-4.03125e-11	-4.78125e-11	-4.78125e-11	-4.0625e-11	-3.96875e-11	-4.21875e-11	-3.875e-11	-3.65625e-11	-3.375e-11	-3.71875e-11
-7.03125e-11	-6.4375e-11	-6.125e-11	-5.6875e-11	-5.1875e-11	-5.5625e-11	-5.78125e-11	-5.625e-11	-5.96875e-11	-6.03125e-11	-6.875e-11	-6.40625e-11	-4.96875e-11		-4.90625e-11	-4.125e-11	-4.53125e-11	-4.15625e-11	-4.4375e-11	-4.03125e-11	-4.03125e-11	-4.53125e-11	-4.53125e-11	-3.28125e-11	-3.65625e-11	-3.5e-11	-3.8125e-11
-8.28125e-11	-6.71875e-11	-6.875e-11	-5.9375e-11	-5.21875e-11	-6.34375e-11	-5.71875e-11	-6.40625e-11	-6.9375e-11	-5.96875e-11	-6.78125e-11	-6.5e-11	-5.40625e-11		-4.65625e-11	-4.4375e-11	-4.34375e-11	-4.40625e-11	-4.15625e-11	-3.84375e-11	-4.125e-11	-4.96875e-11	-4.5e-11	-3.5e-11	-4.125e-11	-3.90625e-11	-4.03125e-11
-7.5e-11	-6.59375e-11	-6.96875e-11	-5.40625e-11	-5.21875e-11	-6.3125e-11	-5.46875e-11	-6.03125e-11	-6.6875e-11	-6.3125e-11	-5.90625e-11	-6.40625e-11	-5.625e-11		-3.96875e-11	-3.78125e-11	-4.21875e-11	-4.65625e-11	-4.15625e-11	-4.125e-11	-4.125e-11	-4.15625e-11	-3.8125e-11	-3.75e-11	-4.34375e-11	-3.71875e-11	-3.90625e-11
-7.3125e-11	-6.9375e-11	-6.96875e-11	-5.59375e-11	-5.40625e-11	-6.1875e-11	-5.5625e-11	-5.5e-11	-5.4375e-11	-6.125e-11	-6.28125e-11	-6.03125e-11	-5.6875e-11		-4.0625e-11	-3.59375e-11	-4.375e-11	-4.53125e-11	-3.8125e-11	-4.15625e-11	-4.65625e-11	-4.5e-11	-3.96875e-11	-4.125e-11	-4.03125e-11	-3.625e-11	-3.65625e-11		Figure 5 F
-8.28125e-11	-6.96875e-11	-6.40625e-11	-5.96875e-11	-5.9375e-11	-5.4375e-11	-5.65625e-11	-6.40625e-11	-6.28125e-11	-5.65625e-11	-6.53125e-11	-6.1875e-11	-5.34375e-11		-4.09375e-11	-4.59375e-11	-4.375e-11	-3.8125e-11	-3.65625e-11	-4.53125e-11	-4.625e-11	-4.34375e-11	-3.875e-11	-4.03125e-11	-3.84375e-11	-3.5625e-11	-3.84375e-11
-7.5e-11	-6.59375e-11	-6.1875e-11	-6.0625e-11	-4.84375e-11	-5.71875e-11	-6.625e-11	-5.9375e-11	-6.09375e-11	-6.8125e-11	-6.96875e-11	-6.28125e-11	-5.96875e-11		-4.03125e-11	-4.4375e-11	-3.84375e-11	-4.21875e-11	-3.84375e-11	-4.28125e-11	-3.96875e-11	-4.125e-11	-3.90625e-11	-4.09375e-11	-4.15625e-11	-3.6875e-11	-4.03125e-11		Acropora current kinetics (long pulses)				Human current kinetics (long pulses)
-7.34375e-11	-6.28125e-11	-6.375e-11	-5.28125e-11	-5.15625e-11	-5.8125e-11	-6.28125e-11	-6.25e-11	-6.65625e-11	-7.03125e-11	-6.03125e-11	-5.96875e-11	-5.5625e-11		-4.21875e-11	-3.84375e-11	-4.1875e-11	-4.1875e-11	-3.90625e-11	-4e-11	-4.09375e-11	-3.84375e-11	-3.84375e-11	-3.75e-11	-3.65625e-11	-4.09375e-11	-3.875e-11
-8.40625e-11	-6.59375e-11	-6.8125e-11	-5.5e-11	-5.46875e-11	-6.09375e-11	-5.78125e-11	-5.375e-11	-5.71875e-11	-5.78125e-11	-6e-11	-6.4375e-11	-5.71875e-11		-4.65625e-11	-4.15625e-11	-4.34375e-11	-4.28125e-11	-4.21875e-11	-3.9375e-11	-3.875e-11	-3.75e-11	-3.875e-11	-3.53125e-11	-3.59375e-11	-3.5625e-11	-3.6875e-11		Mean tau (ms)	sem (ms)	voltage (mV)		Mean tau (ms)	sem (ms)	voltage (mV)
-7.15625e-11	-7.15625e-11	-6.53125e-11	-5.90625e-11	-5.875e-11	-6.59375e-11	-6.1875e-11	-6.28125e-11	-6.65625e-11	-6.1875e-11	-5.9375e-11	-6.3125e-11	-5.3125e-11		-4.59375e-11	-4.3125e-11	-4.3125e-11	-3.71875e-11	-4.5e-11	-4.03125e-11	-4.5625e-11	-4.15625e-11	-4.28125e-11	-3.5625e-11	-4.03125e-11	-3.53125e-11	-4.03125e-11
-8.34375e-11	-6.5e-11	-6.4375e-11	-5.46875e-11	-5.65625e-11	-6.28125e-11	-6.125e-11	-6.1875e-11	-7.65625e-11	-6.40625e-11	-6.15625e-11	-6.21875e-11	-5.84375e-11		-4.5625e-11	-4.03125e-11	-4.5625e-11	-4.34375e-11	-4.84375e-11	-3.875e-11	-4.5e-11	-4.625e-11	-3.625e-11	-3.625e-11	-4.1875e-11	-3.15625e-11	-3.71875e-11		59.6241	14.7483	60		3384.37	210.337	0
-7.34375e-11	-6.9375e-11	-6.6875e-11	-5.25e-11	-5.1875e-11	-5.40625e-11	-5.53125e-11	-5.8125e-11	-5.90625e-11	-6.90625e-11	-6.28125e-11	-6.84375e-11	-5.84375e-11		-4.15625e-11	-4.28125e-11	-4.375e-11	-3.46875e-11	-4.40625e-11	-3.9375e-11	-3.8125e-11	-4.1875e-11	-4.15625e-11	-3.71875e-11	-4.125e-11	-3.53125e-11	-3.53125e-11		70.8975	17.7058	50		3460.34	710.879	20
-7.375e-11	-6.71875e-11	-7.5625e-11	-6.03125e-11	-6.46875e-11	-5.9375e-11	-5.8125e-11	-5.21875e-11	-5.5625e-11	-5.96875e-11	-6.21875e-11	-6e-11	-5.5e-11		-3.75e-11	-4.375e-11	-4.03125e-11	-3.84375e-11	-3.84375e-11	-4.28125e-11	-3.96875e-11	-3.8125e-11	-4.03125e-11	-3.5e-11	-4.15625e-11	-3.8125e-11	-3.78125e-11		81.0431	21.4241	40		3239.73	358.75	40
-8.0625e-11	-6.03125e-11	-6.71875e-11	-6.0625e-11	-5.5625e-11	-6.53125e-11	-5.6875e-11	-5.78125e-11	-6.03125e-11	-5.78125e-11	-6.1875e-11	-6.09375e-11	-5.28125e-11		-4.1875e-11	-4.15625e-11	-4.28125e-11	-4.09375e-11	-4.46875e-11	-4.03125e-11	-4.03125e-11	-4.34375e-11	-3.78125e-11	-3.5e-11	-3.875e-11	-3.375e-11	-3.875e-11		90.5132	22.5375	30		2260.72	155.984	60
-7.5e-11	-6.5e-11	-6.6875e-11	-6.40625e-11	-5.5e-11	-6.09375e-11	-5.5e-11	-6.0625e-11	-6.375e-11	-6.4375e-11	-6.03125e-11	-6.46875e-11	-6.53125e-11		-3.96875e-11	-4.34375e-11	-4.1875e-11	-4.53125e-11	-4.5e-11	-3.96875e-11	-4.15625e-11	-4.40625e-11	-4.1875e-11	-3.625e-11	-3.6875e-11	-3.53125e-11	-3.9375e-11		101.263	24.0075	20		1891.21	72.4123	80
-8.21875e-11	-6.65625e-11	-6.375e-11	-5.78125e-11	-6.1875e-11	-5.78125e-11	-6.03125e-11	-6.125e-11	-5.84375e-11	-6.5e-11	-6.375e-11	-6.28125e-11	-5.78125e-11		-4.40625e-11	-4.1875e-11	-4.4375e-11	-4.09375e-11	-4.40625e-11	-3.84375e-11	-4.8125e-11	-4.15625e-11	-4.1875e-11	-3.59375e-11	-3.96875e-11	-3.84375e-11	-3.71875e-11		114.895	25.7962	10		1708.51	21.0651	100
-8.03125e-11	-6.59375e-11	-6.5e-11	-6.1875e-11	-5.15625e-11	-5.59375e-11	-5.25e-11	-6.3125e-11	-6.28125e-11	-6.125e-11	-6.21875e-11	-6.40625e-11	-5.5e-11		-4.34375e-11	-4.15625e-11	-4.53125e-11	-3.59375e-11	-3.875e-11	-4.65625e-11	-3.9375e-11	-3.9375e-11	-4.15625e-11	-3.875e-11	-4.1875e-11	-3.75e-11	-3.71875e-11		129.852	26.4829	0		1487.44	37.495	120
-8.625e-11	-5.84375e-11	-6.1875e-11	-6.28125e-11	-5.5e-11	-5.375e-11	-5.875e-11	-6.59375e-11	-6.1875e-11	-5.90625e-11	-5.96875e-11	-5.78125e-11	-5.15625e-11		-4.5e-11	-4.53125e-11	-4.65625e-11	-4.375e-11	-3.8125e-11	-4.78125e-11	-4.15625e-11	-4.53125e-11	-3.6875e-11	-3.65625e-11	-3.8125e-11	-3.53125e-11	-3.75e-11		165.04	31.9756	-10		1389.89	23.8423	140
-8.03125e-11	-6.125e-11	-6.65625e-11	-6.28125e-11	-5.15625e-11	-6.03125e-11	-5.09375e-11	-5.71875e-11	-6.125e-11	-6.5625e-11	-6.03125e-11	-5.625e-11	-5.96875e-11		-4.21875e-11	-4.28125e-11	-4.84375e-11	-4.5625e-11	-4.40625e-11	-4.09375e-11	-4.15625e-11	-4.4375e-11	-3.4375e-11	-4.03125e-11	-4.03125e-11	-3.28125e-11	-3.5e-11		233.795	46.8898	-20
-7.5625e-11	-6.5625e-11	-6.78125e-11	-5.34375e-11	-5.84375e-11	-5.59375e-11	-5.78125e-11	-6.34375e-11	-6.25e-11	-6.5625e-11	-6.4375e-11	-6.78125e-11	-5.1875e-11		-4.21875e-11	-4.53125e-11	-3.84375e-11	-4.03125e-11	-4.25e-11	-4.3125e-11	-3.90625e-11	-4.25e-11	-3.65625e-11	-4.40625e-11	-3.90625e-11	-3.84375e-11	-3.6875e-11
-7.6875e-11	-6.4375e-11	-7.4375e-11	-6.46875e-11	-4.75e-11	-5.75e-11	-5.78125e-11	-6.3125e-11	-6.96875e-11	-6.09375e-11	-6.6875e-11	-6.09375e-11	-5.6875e-11		-4.3125e-11	-4.59375e-11	-3.84375e-11	-4.1875e-11	-4.1875e-11	-4.25e-11	-4.0625e-11	-4.25e-11	-3.375e-11	-3.8125e-11	-3.9375e-11	-3.625e-11	-3.6875e-11
-7.5e-11	-5.78125e-11	-6.53125e-11	-6.03125e-11	-5.5e-11	-6.03125e-11	-5.9375e-11	-6.28125e-11	-6.65625e-11	-5.34375e-11	-6.53125e-11	-6.3125e-11	-5.53125e-11		-4.59375e-11	-4.125e-11	-4.46875e-11	-4.46875e-11	-3.96875e-11	-3.84375e-11	-4.34375e-11	-4.53125e-11	-3.65625e-11	-3.78125e-11	-4.09375e-11	-3.4375e-11	-4.15625e-11
-7.4375e-11	-5.90625e-11	-6.59375e-11	-6.4375e-11	-5.9375e-11	-5.8125e-11	-6.40625e-11	-5.65625e-11	-6.40625e-11	-5.96875e-11	-6.4375e-11	-5.9375e-11	-5.4375e-11		-4.40625e-11	-4.34375e-11	-4.28125e-11	-4.15625e-11	-4.3125e-11	-3.6875e-11	-4.4375e-11	-4.53125e-11	-3.59375e-11	-4.15625e-11	-4.09375e-11	-3.75e-11	-4.40625e-11
-7.65625e-11	-7.03125e-11	-6.71875e-11	-5.875e-11	-5.78125e-11	-6.65625e-11	-5.96875e-11	-6.34375e-11	-6.0625e-11	-5.8125e-11	-6.4375e-11	-6.40625e-11	-5.96875e-11		-4.90625e-11	-4.09375e-11	-4.09375e-11	-4.09375e-11	-4.15625e-11	-4.03125e-11	-4.15625e-11	-4.15625e-11	-4.0625e-11	-4.03125e-11	-4.46875e-11	-4.5e-11	-3.78125e-11
-7.90625e-11	-6.15625e-11	-6.6875e-11	-6.53125e-11	-6.5625e-11	-6.0625e-11	-5.34375e-11	-6.46875e-11	-5.9375e-11	-6.46875e-11	-6.125e-11	-6.34375e-11	-5.96875e-11		-4.9375e-11	-4.3125e-11	-4.15625e-11	-3.90625e-11	-4.15625e-11	-3.8125e-11	-4.03125e-11	-4.03125e-11	-4.6875e-11	-4.09375e-11	-3.84375e-11	-4.15625e-11	-3.4375e-11
-7.75e-11	-7.03125e-11	-6.875e-11	-6.09375e-11	-5.65625e-11	-5.78125e-11	-5.5e-11	-5.9375e-11	-6.375e-11	-6.8125e-11	-6.09375e-11	-6.5e-11	-5.96875e-11		-4.65625e-11	-4.53125e-11	-4.21875e-11	-4.03125e-11	-3.78125e-11	-4.375e-11	-4.46875e-11	-3.625e-11	-4.15625e-11	-3.8125e-11	-3.59375e-11	-3.875e-11	-3.65625e-11
-7.15625e-11	-6.875e-11	-6.25e-11	-6.3125e-11	-5.65625e-11	-6.09375e-11	-5.21875e-11	-5.8125e-11	-5.4375e-11	-5.75e-11	-6.40625e-11	-6.5e-11	-5.75e-11		-4.71875e-11	-4.40625e-11	-4.1875e-11	-4.53125e-11	-4.21875e-11	-4.5e-11	-4.375e-11	-4.28125e-11	-3.46875e-11	-3.875e-11	-3.84375e-11	-3.5625e-11	-3.15625e-11
-7.75e-11	-6.34375e-11	-7e-11	-6.5625e-11	-5.3125e-11	-6.21875e-11	-5.40625e-11	-5.9375e-11	-6.03125e-11	-6.46875e-11	-6.03125e-11	-6.21875e-11	-5.59375e-11		-4.03125e-11	-4.03125e-11	-4.125e-11	-4.28125e-11	-4.40625e-11	-3.84375e-11	-3.875e-11	-4.375e-11	-4.03125e-11	-3.46875e-11	-3.875e-11	-3.6875e-11	-3.59375e-11
-8.21875e-11	-5.9375e-11	-6.71875e-11	-6.03125e-11	-5.9375e-11	-6.03125e-11	-4.90625e-11	-6.09375e-11	-6.65625e-11	-5.875e-11	-6e-11	-6.625e-11	-5.3125e-11		-4.375e-11	-4.15625e-11	-4.375e-11	-4.4375e-11	-4.21875e-11	-3.78125e-11	-4.21875e-11	-4.3125e-11	-4.5625e-11	-3.40625e-11	-3.90625e-11	-3.53125e-11	-3.34375e-11
-7.0625e-11	-6.53125e-11	-7.28125e-11	-6.15625e-11	-5.34375e-11	-6.6875e-11	-5.0625e-11	-5.40625e-11	-6.0625e-11	-6.21875e-11	-7.28125e-11	-6.1875e-11	-5.4375e-11		-4.75e-11	-3.90625e-11	-4.34375e-11	-4.0625e-11	-4.34375e-11	-4.09375e-11	-4.34375e-11	-4.25e-11	-4.40625e-11	-3.9375e-11	-3.53125e-11	-3.53125e-11	-3.5625e-11
-7.46875e-11	-7.0625e-11	-6.71875e-11	-6.03125e-11	-5.40625e-11	-6.15625e-11	-5.375e-11	-5.78125e-11	-6.71875e-11	-6.625e-11	-5.65625e-11	-6.4375e-11	-6.46875e-11		-4.46875e-11	-4e-11	-3.875e-11	-3.9375e-11	-4.8125e-11	-4.03125e-11	-4.53125e-11	-3.84375e-11	-3.6875e-11	-3.78125e-11	-3.5e-11	-3.15625e-11	-3.15625e-11
-7.90625e-11	-6.4375e-11	-7.3125e-11	-6.5625e-11	-6e-11	-6.03125e-11	-4.5e-11	-6.28125e-11	-6.8125e-11	-5.6875e-11	-5.5e-11	-5.84375e-11	-5.8125e-11		-4.625e-11	-4.03125e-11	-4.375e-11	-4.03125e-11	-4.28125e-11	-3.78125e-11	-4.21875e-11	-3.9375e-11	-4.09375e-11	-3.84375e-11	-3.5625e-11	-4.1875e-11	-3.71875e-11
-8.28125e-11	-6.34375e-11	-6.4375e-11	-6.78125e-11	-5.5625e-11	-6.5e-11	-5.625e-11	-5.625e-11	-6.15625e-11	-6.15625e-11	-6.375e-11	-6.15625e-11	-6.03125e-11		-4.1875e-11	-3.53125e-11	-4.5e-11	-4.40625e-11	-4.28125e-11	-4.21875e-11	-3.34375e-11	-3.90625e-11	-3.78125e-11	-3.59375e-11	-4.21875e-11	-4.03125e-11	-4.03125e-11
-7.28125e-11	-6.5625e-11	-7.15625e-11	-6.03125e-11	-5.5e-11	-5.75e-11	-5.65625e-11	-6.5e-11	-6.46875e-11	-6.34375e-11	-6.1875e-11	-6.9375e-11	-5.46875e-11		-4.125e-11	-3.90625e-11	-4.4375e-11	-4.59375e-11	-4.34375e-11	-4.40625e-11	-3.71875e-11	-3.96875e-11	-3.65625e-11	-4.03125e-11	-4.375e-11	-3.40625e-11	-3.71875e-11
-7.65625e-11	-7e-11	-7.28125e-11	-6.4375e-11	-5.53125e-11	-6.4375e-11	-5.5e-11	-6.15625e-11	-5.75e-11	-5.75e-11	-5.34375e-11	-6.53125e-11	-5.375e-11		-4.0625e-11	-4.3125e-11	-4.09375e-11	-3.9375e-11	-4.21875e-11	-4.34375e-11	-3.875e-11	-4.28125e-11	-3.71875e-11	-3.59375e-11	-4.28125e-11	-3.59375e-11	-3.9375e-11
-7.40625e-11	-6.40625e-11	-6.53125e-11	-5.96875e-11	-5.03125e-11	-6.1875e-11	-4.96875e-11	-5.90625e-11	-6.34375e-11	-5.71875e-11	-6.09375e-11	-6.34375e-11	-6.25e-11		-4.84375e-11	-4.8125e-11	-4.125e-11	-4.03125e-11	-4.15625e-11	-4.03125e-11	-3.875e-11	-4.53125e-11	-3.6875e-11	-3.5625e-11	-4.125e-11	-3.53125e-11	-3.875e-11
-7.65625e-11	-6.90625e-11	-7e-11	-5.96875e-11	-5.34375e-11	-6.0625e-11	-5.53125e-11	-5.5625e-11	-6.125e-11	-6.09375e-11	-6.6875e-11	-6.5625e-11	-5.46875e-11		-4.65625e-11	-4.5e-11	-4.84375e-11	-4.34375e-11	-4.03125e-11	-4.4375e-11	-4.1875e-11	-4.6875e-11	-4.0625e-11	-3.40625e-11	-3.84375e-11	-3.09375e-11	-3.78125e-11
-7.53125e-11	-6.1875e-11	-7.4375e-11	-6.09375e-11	-5.0625e-11	-6.34375e-11	-5.6875e-11	-6.375e-11	-7e-11	-6.125e-11	-6.5625e-11	-6.09375e-11	-5.5e-11		-4.28125e-11	-4.40625e-11	-4.15625e-11	-4.71875e-11	-4.34375e-11	-4.09375e-11	-4.0625e-11	-4.65625e-11	-4.15625e-11	-3.78125e-11	-3.5e-11	-3.65625e-11	-3.90625e-11
-7.40625e-11	-6.875e-11	-6.46875e-11	-5.84375e-11	-6.21875e-11	-6.375e-11	-5.15625e-11	-5.21875e-11	-6.3125e-11	-6.34375e-11	-5.9375e-11	-5.90625e-11	-6.03125e-11		-4.53125e-11	-4.71875e-11	-4.03125e-11	-4.53125e-11	-4.15625e-11	-4.3125e-11	-3.6875e-11	-4.125e-11	-4.0625e-11	-3.78125e-11	-3.65625e-11	-4.09375e-11	-3.75e-11
-8.15625e-11	-6.71875e-11	-6.40625e-11	-6.1875e-11	-5.625e-11	-6.59375e-11	-4.65625e-11	-6.46875e-11	-6.15625e-11	-5.9375e-11	-6.34375e-11	-5.46875e-11	-5.34375e-11		-4.5e-11	-4.15625e-11	-4.28125e-11	-4.5e-11	-3.78125e-11	-3.53125e-11	-4.0625e-11	-3.84375e-11	-3.4375e-11	-3.4375e-11	-3.5e-11	-4.09375e-11	-3.90625e-11
-7.625e-11	-6.34375e-11	-6.625e-11	-6.09375e-11	-6e-11	-5.875e-11	-5.3125e-11	-5.59375e-11	-6.59375e-11	-6.3125e-11	-5.5e-11	-6.4375e-11	-5.28125e-11		-3.90625e-11	-4.28125e-11	-4.59375e-11	-4.3125e-11	-3.90625e-11	-3.65625e-11	-4.4375e-11	-4.15625e-11	-3.71875e-11	-3.65625e-11	-3.78125e-11	-4.0625e-11	-4.09375e-11
-7.84375e-11	-6.3125e-11	-6.84375e-11	-5.5e-11	-5.5e-11	-6.71875e-11	-5.59375e-11	-5.90625e-11	-6.53125e-11	-6.1875e-11	-5.875e-11	-5.78125e-11	-5.78125e-11		-4.0625e-11	-4.3125e-11	-4.59375e-11	-4.28125e-11	-3.65625e-11	-4.5e-11	-4.375e-11	-4.96875e-11	-3.96875e-11	-4.28125e-11	-4.03125e-11	-3.5e-11	-3.90625e-11
-8.53125e-11	-6.34375e-11	-7.21875e-11	-6.21875e-11	-5.53125e-11	-6.09375e-11	-4.6875e-11	-6.3125e-11	-6.3125e-11	-5.75e-11	-5.65625e-11	-6.84375e-11	-5.75e-11		-4.28125e-11	-4.4375e-11	-4.1875e-11	-4.15625e-11	-3.875e-11	-4.4375e-11	-4.75e-11	-5e-11	-4.09375e-11	-4.5e-11	-3.84375e-11	-3.40625e-11	-4.03125e-11
-7.34375e-11	-6.3125e-11	-6.40625e-11	-6.21875e-11	-5.71875e-11	-6.3125e-11	-5.28125e-11	-6.21875e-11	-6.03125e-11	-6.90625e-11	-5.78125e-11	-6.28125e-11	-6.28125e-11		-4.5625e-11	-4.03125e-11	-4.40625e-11	-3.875e-11	-4.15625e-11	-4.25e-11	-4.1875e-11	-4.3125e-11	-4.03125e-11	-4.28125e-11	-3.40625e-11	-3.65625e-11	-3.625e-11
-8.03125e-11	-6.71875e-11	-6.625e-11	-6.375e-11	-5.34375e-11	-6.5e-11	-4.9375e-11	-5.5625e-11	-5.84375e-11	-5.90625e-11	-6.25e-11	-5.71875e-11	-5.5e-11		-4.4375e-11	-4.03125e-11	-4.5e-11	-4.21875e-11	-3.9375e-11	-4.28125e-11	-3.4375e-11	-4.28125e-11	-4.03125e-11	-4.0625e-11	-3.78125e-11	-3.53125e-11	-4.03125e-11
-7.78125e-11	-6.375e-11	-6.125e-11	-5.875e-11	-5.46875e-11	-6.59375e-11	-4.90625e-11	-5.90625e-11	-6.0625e-11	-6.5e-11	-5.40625e-11	-6.1875e-11	-5.0625e-11		-4.875e-11	-4.0625e-11	-4.46875e-11	-3.78125e-11	-4.34375e-11	-3.84375e-11	-3.9375e-11	-4.65625e-11	-3.78125e-11	-4.03125e-11	-4.3125e-11	-3.875e-11	-4.1875e-11
-7.53125e-11	-6.15625e-11	-6.28125e-11	-6.0625e-11	-5.875e-11	-6.84375e-11	-5.125e-11	-5.9375e-11	-5.90625e-11	-5.96875e-11	-5.65625e-11	-6.03125e-11	-5.5625e-11		-4.03125e-11	-4.15625e-11	-3.84375e-11	-4.15625e-11	-4.03125e-11	-4.09375e-11	-3.6875e-11	-4.15625e-11	-3.78125e-11	-3.78125e-11	-3.71875e-11	-3.8125e-11	-3.40625e-11
-7.8125e-11	-6.09375e-11	-6.03125e-11	-5.375e-11	-5.28125e-11	-6.34375e-11	-5.96875e-11	-5.53125e-11	-6.15625e-11	-6.28125e-11	-6.625e-11	-5.625e-11	-5.03125e-11		-4.25e-11	-4.5e-11	-3.90625e-11	-4.34375e-11	-3.6875e-11	-4.3125e-11	-3.6875e-11	-4.3125e-11	-3.8125e-11	-3.53125e-11	-4.03125e-11	-3.8125e-11	-3.90625e-11
-7.5e-11	-6.65625e-11	-6.71875e-11	-6.09375e-11	-5.65625e-11	-5.59375e-11	-5.25e-11	-6e-11	-6.34375e-11	-6.5e-11	-6e-11	-6.03125e-11	-5.5e-11		-4.4375e-11	-4.71875e-11	-4.5625e-11	-4.0625e-11	-4.03125e-11	-4.53125e-11	-4.3125e-11	-3.96875e-11	-4.03125e-11	-4.3125e-11	-3.90625e-11	-3.90625e-11	-4.09375e-11
-7.59375e-11	-6.5e-11	-7.15625e-11	-6.34375e-11	-5.5e-11	-6.59375e-11	-5.78125e-11	-6.0625e-11	-6.0625e-11	-6.28125e-11	-5.90625e-11	-6.46875e-11	-5.28125e-11		-4.46875e-11	-4.46875e-11	-4.40625e-11	-4.125e-11	-4.625e-11	-4.3125e-11	-4.5e-11	-3.75e-11	-3.8125e-11	-4.65625e-11	-3.28125e-11	-3.84375e-11	-3.8125e-11
-8.21875e-11	-7.125e-11	-6.15625e-11	-6.03125e-11	-4.84375e-11	-6.40625e-11	-5.1875e-11	-6.125e-11	-5.625e-11	-5.59375e-11	-5.875e-11	-5.8125e-11	-5.21875e-11		-4.0625e-11	-4.5e-11	-4.34375e-11	-4.4375e-11	-4.0625e-11	-3.875e-11	-4.65625e-11	-4e-11	-3.90625e-11	-3.78125e-11	-4.09375e-11	-3.65625e-11	-3.53125e-11
-7.71875e-11	-6.96875e-11	-6.34375e-11	-6.84375e-11	-5.5e-11	-6.28125e-11	-5.40625e-11	-6.6875e-11	-6.40625e-11	-5.65625e-11	-6.53125e-11	-5.59375e-11	-5.59375e-11		-4.15625e-11	-4.28125e-11	-4.15625e-11	-4.0625e-11	-4.1875e-11	-4.0625e-11	-4.75e-11	-4.25e-11	-3.84375e-11	-3.53125e-11	-4.65625e-11	-4.15625e-11	-4.03125e-11
-7.9375e-11	-6.5625e-11	-6.34375e-11	-6.28125e-11	-5.40625e-11	-6.84375e-11	-5.09375e-11	-5.6875e-11	-6.4375e-11	-6.28125e-11	-5.40625e-11	-5.84375e-11	-4.96875e-11		-4.65625e-11	-4.34375e-11	-4.21875e-11	-3.8125e-11	-4.53125e-11	-4.1875e-11	-4.40625e-11	-4.78125e-11	-4.21875e-11	-3.65625e-11	-3.90625e-11	-4.28125e-11	-3.59375e-11
-7.8125e-11	-6.15625e-11	-6.40625e-11	-5.90625e-11	-5.78125e-11	-5.71875e-11	-5.03125e-11	-5.6875e-11	-6.21875e-11	-6.40625e-11	-5.1875e-11	-5.71875e-11	-5.875e-11		-4.5e-11	-4.09375e-11	-4.75e-11	-3.8125e-11	-3.90625e-11	-4.1875e-11	-4.03125e-11	-4.5e-11	-4.78125e-11	-3.8125e-11	-4.03125e-11	-4.15625e-11	-3.65625e-11
-7.375e-11	-6.6875e-11	-6.71875e-11	-6.25e-11	-5.5e-11	-6.46875e-11	-4.75e-11	-6.0625e-11	-6.46875e-11	-6.46875e-11	-6.03125e-11	-6.65625e-11	-5.15625e-11		-4.375e-11	-3.75e-11	-4.53125e-11	-3.59375e-11	-4.03125e-11	-3.6875e-11	-3.34375e-11	-4.125e-11	-4.21875e-11	-3.9375e-11	-4.0625e-11	-3.5625e-11	-3.4375e-11
-7.84375e-11	-6.3125e-11	-7.5625e-11	-6.4375e-11	-5.1875e-11	-6.875e-11	-5.21875e-11	-5.6875e-11	-5.46875e-11	-5.90625e-11	-5.6875e-11	-5.84375e-11	-5.28125e-11		-4.125e-11	-4.3125e-11	-4.53125e-11	-3.75e-11	-4.28125e-11	-4.03125e-11	-4.21875e-11	-4.53125e-11	-3.40625e-11	-3.78125e-11	-4.03125e-11	-3.28125e-11	-4.03125e-11
-8.03125e-11	-6.1875e-11	-6.5625e-11	-5.65625e-11	-4.96875e-11	-6.15625e-11	-5.1875e-11	-5.4375e-11	-5.53125e-11	-7.0625e-11	-5.75e-11	-6.53125e-11	-5.0625e-11		-3.78125e-11	-4.5625e-11	-4.5e-11	-4.28125e-11	-3.78125e-11	-4.25e-11	-4.34375e-11	-4.3125e-11	-3.96875e-11	-3.71875e-11	-3.59375e-11	-3.6875e-11	-4.40625e-11
-7.8125e-11	-6.40625e-11	-6.65625e-11	-5.6875e-11	-5.125e-11	-6.625e-11	-5.25e-11	-6e-11	-6.09375e-11	-6.40625e-11	-6.03125e-11	-5.875e-11	-5.53125e-11		-4.3125e-11	-4.4375e-11	-4.09375e-11	-4.09375e-11	-4.0625e-11	-4.03125e-11	-4.03125e-11	-4.28125e-11	-4.34375e-11	-4.59375e-11	-3.78125e-11	-4.125e-11	-4.03125e-11
-7.90625e-11	-6.21875e-11	-7.28125e-11	-6.125e-11	-5.875e-11	-6.28125e-11	-5.46875e-11	-6.03125e-11	-6.15625e-11	-5.625e-11	-5.84375e-11	-6.09375e-11	-5.71875e-11		-4.6875e-11	-5.03125e-11	-3.65625e-11	-3.9375e-11	-4.3125e-11	-4.03125e-11	-4.40625e-11	-4.25e-11	-3.9375e-11	-4.5625e-11	-4.375e-11	-3.6875e-11	-3.5e-11
-7.03125e-11	-6.375e-11	-6.53125e-11	-5.53125e-11	-5.4375e-11	-6.03125e-11	-5.8125e-11	-6.1875e-11	-6.03125e-11	-5.84375e-11	-5.75e-11	-6.53125e-11	-6.46875e-11		-4.3125e-11	-4.34375e-11	-3.875e-11	-3.96875e-11	-4.40625e-11	-4.21875e-11	-4.15625e-11	-4.375e-11	-4.03125e-11	-4.03125e-11	-3.9375e-11	-3.5e-11	-3.28125e-11
-7.4375e-11	-6.15625e-11	-6.96875e-11	-5.84375e-11	-5.5625e-11	-6.25e-11	-4.96875e-11	-6.28125e-11	-5.6875e-11	-5.53125e-11	-6.0625e-11	-5.53125e-11	-5.8125e-11		-4.28125e-11	-3.5e-11	-4.03125e-11	-4.03125e-11	-4.46875e-11	-4.25e-11	-3.875e-11	-4.0625e-11	-4.15625e-11	-4.03125e-11	-4.25e-11	-3.28125e-11	-3.5e-11
-7.65625e-11	-6.4375e-11	-6.71875e-11	-5.6875e-11	-5.46875e-11	-6.78125e-11	-5.5e-11	-6.5e-11	-6.0625e-11	-6.5625e-11	-6.21875e-11	-6.03125e-11	-5.3125e-11		-4.125e-11	-3.90625e-11	-4.625e-11	-4.09375e-11	-4.0625e-11	-3.6875e-11	-3.78125e-11	-4.15625e-11	-4.25e-11	-3.59375e-11	-4.3125e-11	-3.75e-11	-3.8125e-11
-7.71875e-11	-6.8125e-11	-6.96875e-11	-6.5e-11	-5.875e-11	-6.5e-11	-5.53125e-11	-5.8125e-11	-6.1875e-11	-6.1875e-11	-5.9375e-11	-6.5625e-11	-5.65625e-11		-4.40625e-11	-4.25e-11	-4.5e-11	-4.5e-11	-4.21875e-11	-3.78125e-11	-3.9375e-11	-4.375e-11	-4.03125e-11	-3.78125e-11	-4.125e-11	-3.59375e-11	-3.65625e-11
-8.03125e-11	-6.59375e-11	-7.75e-11	-6e-11	-5.09375e-11	-6.46875e-11	-4.9375e-11	-6.1875e-11	-6.25e-11	-5.84375e-11	-5.90625e-11	-5.9375e-11	-5.78125e-11		-4.03125e-11	-4.5e-11	-4.375e-11	-4.09375e-11	-4.0625e-11	-4.3125e-11	-3.9375e-11	-4.59375e-11	-3.9375e-11	-3.875e-11	-4.125e-11	-3.78125e-11	-4.09375e-11
-7.8125e-11	-6.625e-11	-6.90625e-11	-6.5625e-11	-5.71875e-11	-6.5625e-11	-4.9375e-11	-5.875e-11	-6.0625e-11	-6.46875e-11	-5.40625e-11	-6.5625e-11	-5.15625e-11		-4.3125e-11	-4.46875e-11	-4.28125e-11	-4.1875e-11	-4.34375e-11	-4.6875e-11	-4.21875e-11	-4.40625e-11	-3.90625e-11	-3.78125e-11	-4.21875e-11	-3.65625e-11	-4.03125e-11
-7.21875e-11	-6.78125e-11	-7.09375e-11	-5.8125e-11	-5.9375e-11	-6.5e-11	-5.21875e-11	-6.3125e-11	-6.59375e-11	-5.875e-11	-6e-11	-6.21875e-11	-5.28125e-11		-4.5e-11	-4.1875e-11	-4.28125e-11	-4.40625e-11	-4.53125e-11	-4.21875e-11	-4.03125e-11	-3.9375e-11	-4.40625e-11	-3.53125e-11	-4.0625e-11	-3.40625e-11	-3.5e-11
-8.28125e-11	-6.71875e-11	-6.8125e-11	-5.5625e-11	-5.4375e-11	-7.0625e-11	-5.84375e-11	-6.21875e-11	-6.96875e-11	-5.625e-11	-6.5e-11	-6.625e-11	-5.15625e-11		-3.71875e-11	-4.59375e-11	-3.75e-11	-4.78125e-11	-4.53125e-11	-4.28125e-11	-3.5625e-11	-4.0625e-11	-4.4375e-11	-3.65625e-11	-4.09375e-11	-3.6875e-11	-4.125e-11
-7.65625e-11	-7.34375e-11	-6.4375e-11	-7.09375e-11	-5.59375e-11	-6.25e-11	-5.90625e-11	-5.5e-11	-6.59375e-11	-6.03125e-11	-5.46875e-11	-6.03125e-11	-5.40625e-11		-4.375e-11	-4.65625e-11	-3.90625e-11	-4.09375e-11	-4.34375e-11	-4.28125e-11	-3.78125e-11	-3.9375e-11	-4.0625e-11	-3.78125e-11	-4.03125e-11	-4.0625e-11	-3.90625e-11
-7.5e-11	-7.0625e-11	-7e-11	-5.6875e-11	-5.75e-11	-6.65625e-11	-5.78125e-11	-6.21875e-11	-6.65625e-11	-6.71875e-11	-5.78125e-11	-6.34375e-11	-5.4375e-11		-4.9375e-11	-4.4375e-11	-4.15625e-11	-4.15625e-11	-4.5625e-11	-3.875e-11	-3.6875e-11	-4.1875e-11	-4.3125e-11	-3.84375e-11	-3.875e-11	-3.71875e-11	-3.28125e-11
-7.6875e-11	-7.5e-11	-6.90625e-11	-6.3125e-11	-5.28125e-11	-6.59375e-11	-5.09375e-11	-6.65625e-11	-5.5e-11	-6.375e-11	-5.5625e-11	-6.59375e-11	-5.5e-11		-4.34375e-11	-4.59375e-11	-4.15625e-11	-4.21875e-11	-4.1875e-11	-3.6875e-11	-3.9375e-11	-4.46875e-11	-4.34375e-11	-4.03125e-11	-3.625e-11	-3.53125e-11	-3.25e-11
-7.4375e-11	-7e-11	-7.1875e-11	-5.53125e-11	-5.34375e-11	-5.9375e-11	-5.0625e-11	-6e-11	-5.875e-11	-6.03125e-11	-6.375e-11	-5.78125e-11	-5.375e-11		-3.96875e-11	-4.53125e-11	-4.5625e-11	-4.03125e-11	-4.53125e-11	-4.15625e-11	-4.46875e-11	-4.65625e-11	-4.25e-11	-3.59375e-11	-3.65625e-11	-3.40625e-11	-3.5e-11
-7.71875e-11	-7.5e-11	-6.90625e-11	-6.03125e-11	-4.96875e-11	-6.65625e-11	-5.4375e-11	-6.46875e-11	-6.84375e-11	-6.03125e-11	-5.84375e-11	-6.53125e-11	-5.5e-11		-4.125e-11	-4.28125e-11	-4.25e-11	-4.0625e-11	-4.46875e-11	-4.3125e-11	-4.25e-11	-4.6875e-11	-3.8125e-11	-3.59375e-11	-3.78125e-11	-3.5625e-11	-3.84375e-11
-7.4375e-11	-6.53125e-11	-6.78125e-11	-6.21875e-11	-5.15625e-11	-6.90625e-11	-5.1875e-11	-6.9375e-11	-6.3125e-11	-6.28125e-11	-6.4375e-11	-6.21875e-11	-5.3125e-11		-4.09375e-11	-4.46875e-11	-4.09375e-11	-4.15625e-11	-4.53125e-11	-4.09375e-11	-3.875e-11	-4.625e-11	-4.03125e-11	-3.6875e-11	-3.65625e-11	-4.03125e-11	-4.1875e-11
-8.03125e-11	-6.9375e-11	-6.78125e-11	-5.6875e-11	-4.8125e-11	-6.125e-11	-5.6875e-11	-5.96875e-11	-6.25e-11	-6.09375e-11	-6.3125e-11	-6.1875e-11	-5.625e-11		-4.03125e-11	-4.34375e-11	-4.28125e-11	-4.625e-11	-4.46875e-11	-3.90625e-11	-4.59375e-11	-4.40625e-11	-4.1875e-11	-3.71875e-11	-3.78125e-11	-3.96875e-11	-3.9375e-11
-7.65625e-11	-6.53125e-11	-7.21875e-11	-6.03125e-11	-5.4375e-11	-6.25e-11	-5.125e-11	-6.40625e-11	-6.65625e-11	-5.875e-11	-5.84375e-11	-6.28125e-11	-5.9375e-11		-4.28125e-11	-3.75e-11	-4.03125e-11	-4.71875e-11	-4.34375e-11	-4.3125e-11	-4.625e-11	-4.40625e-11	-4.09375e-11	-3.84375e-11	-3.9375e-11	-3.78125e-11	-3.78125e-11
-7.8125e-11	-7.15625e-11	-6.53125e-11	-6.15625e-11	-5.15625e-11	-5.9375e-11	-5.28125e-11	-6.65625e-11	-6.65625e-11	-5.90625e-11	-5.59375e-11	-6.1875e-11	-5.8125e-11		-4.34375e-11	-4.1875e-11	-4.09375e-11	-3.96875e-11	-4.46875e-11	-4.375e-11	-3.5625e-11	-4.5625e-11	-4.28125e-11	-4.03125e-11	-4.03125e-11	-4.03125e-11	-3.71875e-11
-7.46875e-11	-6.90625e-11	-7.03125e-11	-5.21875e-11	-5.90625e-11	-6.53125e-11	-5.75e-11	-6.15625e-11	-6.65625e-11	-5.78125e-11	-5.75e-11	-5.8125e-11	-6.5625e-11		-4.5e-11	-4.5e-11	-4.375e-11	-4.15625e-11	-4.15625e-11	-3.65625e-11	-3.5e-11	-4.4375e-11	-4.03125e-11	-3.84375e-11	-4.0625e-11	-3.71875e-11	-3.78125e-11
-8.34375e-11	-6.8125e-11	-6.78125e-11	-6.03125e-11	-5.53125e-11	-6.65625e-11	-5.21875e-11	-5.9375e-11	-6.28125e-11	-6.21875e-11	-5.78125e-11	-5.5e-11	-4.71875e-11		-4.53125e-11	-4.125e-11	-4.34375e-11	-3.5625e-11	-4.34375e-11	-3.9375e-11	-4.15625e-11	-3.8125e-11	-3.84375e-11	-3.6875e-11	-4.125e-11	-3.5e-11	-3.59375e-11
-8.03125e-11	-6.75e-11	-6.875e-11	-6.125e-11	-5.21875e-11	-6.4375e-11	-5.84375e-11	-6.6875e-11	-5.9375e-11	-6.90625e-11	-6.03125e-11	-6.28125e-11	-5.1875e-11		-4.5e-11	-4.59375e-11	-4.03125e-11	-3.4375e-11	-4.21875e-11	-4.15625e-11	-4.03125e-11	-3.78125e-11	-3.75e-11	-3.78125e-11	-3.84375e-11	-3.03125e-11	-3.71875e-11
-7.78125e-11	-7.25e-11	-6.90625e-11	-6.40625e-11	-5.09375e-11	-6.53125e-11	-6.0625e-11	-6.3125e-11	-6.40625e-11	-5.875e-11	-5.875e-11	-6.0625e-11	-5.03125e-11		-4.6875e-11	-4.5e-11	-3.8125e-11	-3.78125e-11	-3.875e-11	-4.34375e-11	-4.09375e-11	-4.40625e-11	-3.71875e-11	-3.6875e-11	-3.875e-11	-3.59375e-11	-3.9375e-11
-7.28125e-11	-7.0625e-11	-6.59375e-11	-5.3125e-11	-5.25e-11	-6.5e-11	-5.1875e-11	-6.3125e-11	-6.59375e-11	-6.125e-11	-6.15625e-11	-6.09375e-11	-6.03125e-11		-4.5e-11	-4.25e-11	-4.1875e-11	-4.15625e-11	-3.875e-11	-4.21875e-11	-3.84375e-11	-4.4375e-11	-4.5625e-11	-3.46875e-11	-4.3125e-11	-3.90625e-11	-3.28125e-11
-7.5e-11	-6.9375e-11	-7.0625e-11	-6.25e-11	-5.4375e-11	-6.28125e-11	-5.28125e-11	-6.59375e-11	-6.15625e-11	-6.25e-11	-5.6875e-11	-6.09375e-11	-4.90625e-11		-4.75e-11	-4.5e-11	-4.4375e-11	-4.375e-11	-4.46875e-11	-4.15625e-11	-4.03125e-11	-4.03125e-11	-4.8125e-11	-3.5625e-11	-4.0625e-11	-4e-11	-3.65625e-11
-7.84375e-11	-6.6875e-11	-7.0625e-11	-5.84375e-11	-5.65625e-11	-7.15625e-11	-5.21875e-11	-6.5625e-11	-6.40625e-11	-5.9375e-11	-5.53125e-11	-6.40625e-11	-5.96875e-11		-4.21875e-11	-4.09375e-11	-4.5e-11	-4.21875e-11	-4.59375e-11	-4.46875e-11	-3.90625e-11	-4.03125e-11	-3.6875e-11	-3.59375e-11	-4.09375e-11	-4.40625e-11	-3.75e-11
-7.53125e-11	-6.6875e-11	-6.6875e-11	-5.6875e-11	-5.46875e-11	-6.0625e-11	-5.46875e-11	-6.5e-11	-5.4375e-11	-5.5e-11	-6.21875e-11	-6.34375e-11	-6e-11		-4.28125e-11	-4.6875e-11	-4.25e-11	-4.15625e-11	-4.5625e-11	-4.4375e-11	-4.03125e-11	-3.84375e-11	-3.9375e-11	-3.5625e-11	-3.71875e-11	-4.28125e-11	-3.59375e-11
-7.65625e-11	-6.8125e-11	-6.5625e-11	-6e-11	-6.1875e-11	-6.03125e-11	-5.09375e-11	-6.71875e-11	-6.15625e-11	-6.09375e-11	-5.9375e-11	-6.09375e-11	-5e-11		-4.28125e-11	-4.46875e-11	-3.8125e-11	-4.09375e-11	-4.65625e-11	-4.03125e-11	-3.78125e-11	-4.28125e-11	-4.125e-11	-3.78125e-11	-4.1875e-11	-4.03125e-11	-3.75e-11
-8.40625e-11	-7e-11	-6.46875e-11	-6.125e-11	-5.3125e-11	-5.75e-11	-4.96875e-11	-6.40625e-11	-6.03125e-11	-6.21875e-11	-6.40625e-11	-6.53125e-11	-5.28125e-11		-3.96875e-11	-4.90625e-11	-4.03125e-11	-4.3125e-11	-3.875e-11	-3.78125e-11	-4.03125e-11	-3.625e-11	-3.90625e-11	-3.65625e-11	-4.0625e-11	-3.9375e-11	-4.28125e-11
-8.0625e-11	-6.71875e-11	-7.125e-11	-6.34375e-11	-5.625e-11	-5.71875e-11	-5.6875e-11	-6.5625e-11	-6.34375e-11	-5.875e-11	-6.03125e-11	-6.4375e-11	-5.84375e-11		-3.875e-11	-4.34375e-11	-3.8125e-11	-4.0625e-11	-3.5625e-11	-3.84375e-11	-4.09375e-11	-3.625e-11	-4.21875e-11	-4.375e-11	-3.5e-11	-3.6875e-11	-4.34375e-11
-7.84375e-11	-7.4375e-11	-6.875e-11	-5.9375e-11	-5.46875e-11	-6.3125e-11	-6.03125e-11	-6.375e-11	-5.875e-11	-5.9375e-11	-5.5e-11	-6.5625e-11	-5.40625e-11		-4.4375e-11	-4.0625e-11	-4.125e-11	-3.9375e-11	-3.96875e-11	-4.5e-11	-4.15625e-11	-3.625e-11	-4.1875e-11	-4.3125e-11	-3.90625e-11	-3.59375e-11	-3.53125e-11
-7.65625e-11	-6.90625e-11	-6.8125e-11	-6.53125e-11	-6.03125e-11	-6.28125e-11	-5.1875e-11	-6.28125e-11	-6.5e-11	-5.9375e-11	-5.75e-11	-6.71875e-11	-5.3125e-11		-4.40625e-11	-4.28125e-11	-3.9375e-11	-3.9375e-11	-4.125e-11	-4.0625e-11	-4.125e-11	-4.03125e-11	-4.03125e-11	-4.0625e-11	-3.875e-11	-4.09375e-11	-3.65625e-11
-7.84375e-11	-6.5625e-11	-7e-11	-5e-11	-5.09375e-11	-6.15625e-11	-6.03125e-11	-6.5e-11	-6.625e-11	-6.46875e-11	-5.3125e-11	-6.25e-11	-5.53125e-11		-4.59375e-11	-4.28125e-11	-4.28125e-11	-4.59375e-11	-4.21875e-11	-4.25e-11	-3.71875e-11	-3.90625e-11	-3.84375e-11	-3.59375e-11	-3.5e-11	-3.21875e-11	-3.84375e-11
-7.28125e-11	-7e-11	-7.28125e-11	-6e-11	-5.21875e-11	-6.71875e-11	-6.125e-11	-6.90625e-11	-6.40625e-11	-6.40625e-11	-5.8125e-11	-6.71875e-11	-5.3125e-11		-4.59375e-11	-4.21875e-11	-4.375e-11	-4.5e-11	-4.34375e-11	-3.75e-11	-4.3125e-11	-4.125e-11	-3.625e-11	-4.03125e-11	-3.53125e-11	-3.65625e-11	-4.21875e-11
-7.5e-11	-7.03125e-11	-6.78125e-11	-5.8125e-11	-5.84375e-11	-5.5e-11	-5.96875e-11	-6.09375e-11	-5.78125e-11	-6.0625e-11	-5.40625e-11	-6.375e-11	-5.15625e-11		-4.65625e-11	-4.15625e-11	-4.0625e-11	-3.65625e-11	-4.96875e-11	-3.6875e-11	-3.90625e-11	-4.46875e-11	-3.5625e-11	-4.03125e-11	-3.9375e-11	-4.0625e-11	-3.4375e-11
-7.3125e-11	-7.28125e-11	-7.03125e-11	-5.75e-11	-5.4375e-11	-6.5625e-11	-5.28125e-11	-5.65625e-11	-5.5625e-11	-6.625e-11	-5.84375e-11	-6.28125e-11	-6.09375e-11		-4.5625e-11	-3.90625e-11	-4.1875e-11	-4.03125e-11	-4.9375e-11	-4.15625e-11	-4.21875e-11	-4.6875e-11	-3.25e-11	-4.46875e-11	-3.84375e-11	-4.03125e-11	-3.8125e-11
-7.90625e-11	-6.84375e-11	-6.34375e-11	-5.46875e-11	-5.59375e-11	-5.875e-11	-5.34375e-11	-6.5e-11	-6e-11	-5.78125e-11	-6.21875e-11	-6.03125e-11	-5.34375e-11		-4.15625e-11	-4.59375e-11	-4.34375e-11	-4e-11	-4.6875e-11	-4.03125e-11	-4.40625e-11	-4.125e-11	-4.375e-11	-3.90625e-11	-3.46875e-11	-3.59375e-11	-4.09375e-11
-6.75e-11	-6.75e-11	-7e-11	-5.90625e-11	-4.5625e-11	-6.59375e-11	-5.34375e-11	-6.4375e-11	-6.21875e-11	-5.5625e-11	-5.84375e-11	-5.875e-11	-5.1875e-11		-4.0625e-11	-5.03125e-11	-3.90625e-11	-4.0625e-11	-4.0625e-11	-4.09375e-11	-3.90625e-11	-3.8125e-11	-3.875e-11	-3.90625e-11	-3.59375e-11	-3.6875e-11	-3.375e-11
-7.6875e-11	-6.75e-11	-7.5e-11	-6.0625e-11	-6.1875e-11	-5.96875e-11	-5.75e-11	-6.71875e-11	-6.5625e-11	-5.96875e-11	-6.03125e-11	-5.71875e-11	-5.34375e-11		-4.28125e-11	-4.15625e-11	-4.125e-11	-4.15625e-11	-3.84375e-11	-4.15625e-11	-3.65625e-11	-4.03125e-11	-3.53125e-11	-4.03125e-11	-3.5e-11	-3.71875e-11	-4.15625e-11
-8.03125e-11	-7e-11	-6.8125e-11	-6.1875e-11	-6.09375e-11	-6.21875e-11	-5.65625e-11	-6.0625e-11	-6.78125e-11	-5.09375e-11	-5.96875e-11	-6.375e-11	-4.5625e-11		-4.53125e-11	-4.0625e-11	-4.46875e-11	-3.9375e-11	-4.03125e-11	-4.09375e-11	-3.5625e-11	-4.28125e-11	-3.90625e-11	-4.15625e-11	-3.78125e-11	-3.9375e-11	-4.03125e-11
-7.65625e-11	-7.09375e-11	-6.21875e-11	-6.09375e-11	-5.5e-11	-6.28125e-11	-5.9375e-11	-6.8125e-11	-6.09375e-11	-6.03125e-11	-5.90625e-11	-6.3125e-11	-5.40625e-11		-4.65625e-11	-3.96875e-11	-4.28125e-11	-3.9375e-11	-4.34375e-11	-4.25e-11	-3.84375e-11	-4.15625e-11	-4.21875e-11	-3.6875e-11	-4.34375e-11	-3.78125e-11	-3.4375e-11
-7.71875e-11	-7.3125e-11	-6.28125e-11	-6.28125e-11	-5.4375e-11	-5.8125e-11	-5.53125e-11	-6.34375e-11	-6.1875e-11	-6.03125e-11	-5.5e-11	-5.96875e-11	-5.28125e-11		-4.96875e-11	-3.5625e-11	-4.4375e-11	-4.28125e-11	-4.4375e-11	-4.28125e-11	-4.03125e-11	-4.03125e-11	-4.21875e-11	-3.71875e-11	-3.84375e-11	-3.9375e-11	-4e-11
-8.0625e-11	-7.1875e-11	-6.65625e-11	-6.03125e-11	-5.84375e-11	-5.90625e-11	-5.78125e-11	-6.71875e-11	-6.625e-11	-5.71875e-11	-5.5625e-11	-6.40625e-11	-5.53125e-11		-4.6875e-11	-4.34375e-11	-4.46875e-11	-4.71875e-11	-4.03125e-11	-4.1875e-11	-4.09375e-11	-4.03125e-11	-4.15625e-11	-3.84375e-11	-3.40625e-11	-3.71875e-11	-4.4375e-11
-8.125e-11	-7.375e-11	-6.78125e-11	-5.90625e-11	-5.84375e-11	-6.40625e-11	-5.78125e-11	-6.21875e-11	-6.53125e-11	-5.71875e-11	-6.03125e-11	-6.34375e-11	-4.875e-11		-4.15625e-11	-4.71875e-11	-4.34375e-11	-4.40625e-11	-3.90625e-11	-4.15625e-11	-4.28125e-11	-4.28125e-11	-3.71875e-11	-4.03125e-11	-4.1875e-11	-3.46875e-11	-4.1875e-11
-8.09375e-11	-6.625e-11	-7.40625e-11	-6.03125e-11	-6e-11	-5.59375e-11	-5.5e-11	-6.5e-11	-6.5e-11	-5.75e-11	-5.96875e-11	-5.9375e-11	-5.78125e-11		-3.875e-11	-4.71875e-11	-3.84375e-11	-3.65625e-11	-4.1875e-11	-4.15625e-11	-4.21875e-11	-4.34375e-11	-3.59375e-11	-3.6875e-11	-4.53125e-11	-3.375e-11	-4.25e-11
-8.0625e-11	-7e-11	-7.15625e-11	-6.15625e-11	-6.09375e-11	-6.34375e-11	-5.90625e-11	-6.28125e-11	-5.625e-11	-5.78125e-11	-5.78125e-11	-6.5625e-11	-5.40625e-11		-3.90625e-11	-4.53125e-11	-3.71875e-11	-3.8125e-11	-4.375e-11	-3.59375e-11	-4.28125e-11	-4.5e-11	-3.84375e-11	-4.1875e-11	-3.96875e-11	-4.15625e-11	-4.15625e-11
-8.3125e-11	-6.71875e-11	-6.75e-11	-6.28125e-11	-5.46875e-11	-6.125e-11	-6.03125e-11	-6.46875e-11	-6.5e-11	-6.09375e-11	-6.1875e-11	-5.78125e-11	-5.65625e-11		-4.28125e-11	-4.03125e-11	-3.59375e-11	-3.8125e-11	-4.1875e-11	-3.4375e-11	-3.75e-11	-3.78125e-11	-4.09375e-11	-4e-11	-4.0625e-11	-4.125e-11	-3.59375e-11
-8.5625e-11	-7.15625e-11	-7.09375e-11	-6.28125e-11	-5.5e-11	-5.96875e-11	-5.4375e-11	-6.84375e-11	-6.1875e-11	-5.4375e-11	-6.4375e-11	-5.84375e-11	-5.9375e-11		-4.34375e-11	-4.03125e-11	-3.78125e-11	-3.71875e-11	-3.96875e-11	-3.96875e-11	-3.65625e-11	-4.5e-11	-3.8125e-11	-4.125e-11	-4.03125e-11	-3.78125e-11	-3.09375e-11
-8.59375e-11	-6.9375e-11	-7.125e-11	-5.78125e-11	-5.4375e-11	-5.90625e-11	-5.84375e-11	-6.75e-11	-5.78125e-11	-5.5e-11	-5.75e-11	-6.625e-11	-5.84375e-11		-4.21875e-11	-4.03125e-11	-4.5e-11	-4.0625e-11	-3.96875e-11	-3.9375e-11	-4.34375e-11	-4.3125e-11	-4.03125e-11	-3.8125e-11	-4.34375e-11	-3.4375e-11	-3.53125e-11
-7.84375e-11	-6.875e-11	-6.875e-11	-5.75e-11	-5.28125e-11	-6.0625e-11	-5.90625e-11	-6.03125e-11	-6.28125e-11	-6.28125e-11	-5.40625e-11	-6.34375e-11	-5.3125e-11		-3.6875e-11	-4.34375e-11	-5e-11	-4.03125e-11	-3.84375e-11	-3.9375e-11	-4.28125e-11	-4.21875e-11	-4.0625e-11	-3.71875e-11	-3.90625e-11	-4.03125e-11	-3.53125e-11
-8.25e-11	-6.625e-11	-6.53125e-11	-6.125e-11	-6.125e-11	-6.3125e-11	-5.59375e-11	-6.5625e-11	-6.0625e-11	-5.5625e-11	-6.3125e-11	-5.78125e-11	-5.84375e-11		-4.15625e-11	-4.4375e-11	-4.71875e-11	-3.78125e-11	-4.1875e-11	-4.28125e-11	-4.21875e-11	-4.0625e-11	-4.1875e-11	-3.59375e-11	-3.84375e-11	-4.03125e-11	-3.96875e-11
-8.3125e-11	-6.78125e-11	-6.59375e-11	-5.90625e-11	-5.875e-11	-7e-11	-5.34375e-11	-7e-11	-6e-11	-5.8125e-11	-5.96875e-11	-6.3125e-11	-5.875e-11		-4.15625e-11	-4.4375e-11	-4.59375e-11	-4.28125e-11	-4.4375e-11	-3.8125e-11	-3.9375e-11	-4.125e-11	-4.3125e-11	-3.875e-11	-3.84375e-11	-3.8125e-11	-4.03125e-11
-8.53125e-11	-6.71875e-11	-7.53125e-11	-5.65625e-11	-5.53125e-11	-5.90625e-11	-5.96875e-11	-6.5e-11	-5.84375e-11	-5.625e-11	-5.6875e-11	-6.65625e-11	-6.0625e-11		-4.375e-11	-4.46875e-11	-4.75e-11	-3.78125e-11	-4.09375e-11	-3.875e-11	-3.875e-11	-4.03125e-11	-4.1875e-11	-4.40625e-11	-3.75e-11	-3.78125e-11	-4.03125e-11
-7.34375e-11	-6.65625e-11	-6.5625e-11	-5.6875e-11	-5.8125e-11	-5.75e-11	-5.625e-11	-6.53125e-11	-6.40625e-11	-5.78125e-11	-6.03125e-11	-6.625e-11	-5.53125e-11		-4.59375e-11	-4.4375e-11	-4.5e-11	-3.65625e-11	-4.03125e-11	-4.21875e-11	-4.1875e-11	-4.78125e-11	-4.375e-11	-4.21875e-11	-3.78125e-11	-3.65625e-11	-4.34375e-11
-7.59375e-11	-6.6875e-11	-7.03125e-11	-6.1875e-11	-5.84375e-11	-5.8125e-11	-5.75e-11	-6.40625e-11	-6.46875e-11	-6.03125e-11	-6.5e-11	-6.5e-11	-5.6875e-11		-4.71875e-11	-4.53125e-11	-4.15625e-11	-3.90625e-11	-4.375e-11	-4.71875e-11	-4.40625e-11	-4.65625e-11	-3.9375e-11	-3.28125e-11	-4e-11	-4.1875e-11	-4.09375e-11
-7.78125e-11	-7.09375e-11	-7e-11	-6.09375e-11	-5.71875e-11	-6.34375e-11	-5.03125e-11	-6.4375e-11	-6.09375e-11	-6.3125e-11	-5.53125e-11	-5.71875e-11	-5.15625e-11		-4.65625e-11	-4.78125e-11	-3.65625e-11	-4.0625e-11	-4.65625e-11	-4.15625e-11	-3.84375e-11	-4.28125e-11	-3.21875e-11	-3.875e-11	-4.0625e-11	-3.84375e-11	-3.84375e-11
-7.84375e-11	-6.53125e-11	-7.09375e-11	-5.84375e-11	-5.40625e-11	-5.65625e-11	-5.46875e-11	-6.53125e-11	-6.1875e-11	-6.40625e-11	-5.84375e-11	-6.28125e-11	-5.90625e-11		-4.28125e-11	-4.5625e-11	-4.03125e-11	-4.1875e-11	-4.46875e-11	-4.09375e-11	-4e-11	-3.9375e-11	-3.71875e-11	-3.75e-11	-3.6875e-11	-3.6875e-11	-3.53125e-11
-8.09375e-11	-7.09375e-11	-7e-11	-6.21875e-11	-5.65625e-11	-5.75e-11	-5.78125e-11	-6.4375e-11	-6.21875e-11	-6.03125e-11	-5.78125e-11	-6.03125e-11	-6e-11		-4.21875e-11	-4.28125e-11	-4.28125e-11	-3.96875e-11	-4.53125e-11	-4.28125e-11	-4.28125e-11	-4.3125e-11	-4.21875e-11	-4.15625e-11	-4.28125e-11	-3.28125e-11	-3.3125e-11
-7.5e-11	-6.40625e-11	-7e-11	-6.5e-11	-5.65625e-11	-5.5e-11	-6.21875e-11	-6.21875e-11	-6.125e-11	-5.875e-11	-5.5e-11	-5.53125e-11	-5.59375e-11		-4.0625e-11	-4.75e-11	-4.28125e-11	-4.03125e-11	-4.625e-11	-4.03125e-11	-4.09375e-11	-3.9375e-11	-4.28125e-11	-4.03125e-11	-3.84375e-11	-3.25e-11	-3.3125e-11
-7.09375e-11	-6.4375e-11	-6.84375e-11	-6.0625e-11	-5.53125e-11	-6.09375e-11	-5.5625e-11	-6.5e-11	-6.0625e-11	-6e-11	-6.1875e-11	-5.75e-11	-5.71875e-11		-4.28125e-11	-4.6875e-11	-4.1875e-11	-4.21875e-11	-4.46875e-11	-4.03125e-11	-3.65625e-11	-3.6875e-11	-4.375e-11	-4.21875e-11	-3.625e-11	-3.4375e-11	-3.53125e-11
-7.59375e-11	-6.84375e-11	-7.28125e-11	-6.125e-11	-5.6875e-11	-5.53125e-11	-6e-11	-6.5e-11	-6.0625e-11	-6.15625e-11	-5.90625e-11	-6.28125e-11	-5.5e-11		-4.84375e-11	-4.46875e-11	-4.28125e-11	-3.6875e-11	-4.15625e-11	-4.375e-11	-4.09375e-11	-3.71875e-11	-3.96875e-11	-3.59375e-11	-3.71875e-11	-3.78125e-11	-3.78125e-11
-8.03125e-11	-7.5e-11	-7.4375e-11	-6.53125e-11	-5.28125e-11	-5.84375e-11	-5.34375e-11	-6.4375e-11	-6.46875e-11	-6.59375e-11	-6.375e-11	-6.25e-11	-5.53125e-11		-4.5625e-11	-4.25e-11	-4.34375e-11	-4.21875e-11	-3.96875e-11	-3.96875e-11	-4.34375e-11	-4.28125e-11	-3.78125e-11	-3.5e-11	-3.59375e-11	-3.78125e-11	-3.78125e-11
-7.5625e-11	-6.875e-11	-7.09375e-11	-6.09375e-11	-5.6875e-11	-5.65625e-11	-6.03125e-11	-6.21875e-11	-5.53125e-11	-6.03125e-11	-5.46875e-11	-6.0625e-11	-5.78125e-11		-3.84375e-11	-4.03125e-11	-4.46875e-11	-4.125e-11	-4.21875e-11	-3.9375e-11	-3.84375e-11	-4.5e-11	-4.15625e-11	-3.96875e-11	-3.78125e-11	-4.1875e-11	-3.78125e-11
-7.6875e-11	-7.0625e-11	-7.59375e-11	-6.21875e-11	-4.6875e-11	-6.25e-11	-5.75e-11	-5.90625e-11	-6.03125e-11	-6.1875e-11	-6.5e-11	-6.40625e-11	-5.65625e-11		-4.125e-11	-4.40625e-11	-4.34375e-11	-3.8125e-11	-4.59375e-11	-4.28125e-11	-3.8125e-11	-4.09375e-11	-3.75e-11	-4.4375e-11	-4.09375e-11	-4.0625e-11	-4.03125e-11
-7.65625e-11	-7.46875e-11	-6.6875e-11	-6.3125e-11	-5.28125e-11	-6.34375e-11	-5.59375e-11	-5.9375e-11	-5.6875e-11	-5.03125e-11	-5.4375e-11	-6.15625e-11	-5.71875e-11		-4.15625e-11	-4.40625e-11	-4.21875e-11	-4.34375e-11	-4.5e-11	-4.28125e-11	-3.6875e-11	-4.5e-11	-3.9375e-11	-3.90625e-11	-4.0625e-11	-3.90625e-11	-4.09375e-11
-7.15625e-11	-6.21875e-11	-7.03125e-11	-5.78125e-11	-5.21875e-11	-5.5e-11	-6.28125e-11	-5.53125e-11	-6.0625e-11	-6.0625e-11	-5.78125e-11	-6.15625e-11	-5.53125e-11		-4.75e-11	-4.53125e-11	-3.875e-11	-3.84375e-11	-4.28125e-11	-4.09375e-11	-3.71875e-11	-4.3125e-11	-4.09375e-11	-3.5e-11	-4.15625e-11	-3.625e-11	-3.75e-11
-8.09375e-11	-6.28125e-11	-7.09375e-11	-6.15625e-11	-5.875e-11	-5.5e-11	-5.3125e-11	-6.03125e-11	-6.84375e-11	-5.90625e-11	-5.8125e-11	-6.5625e-11	-5.53125e-11		-5.0625e-11	-4.28125e-11	-4.03125e-11	-4.09375e-11	-4.21875e-11	-3.78125e-11	-3.78125e-11	-3.96875e-11	-3.65625e-11	-3.46875e-11	-4.0625e-11	-3.625e-11	-3.875e-11
-7.53125e-11	-6.875e-11	-6.59375e-11	-5.96875e-11	-5.46875e-11	-5.96875e-11	-5.5e-11	-6.4375e-11	-6.09375e-11	-5.9375e-11	-5.4375e-11	-5.78125e-11	-5.5e-11		-5.03125e-11	-4.21875e-11	-3.9375e-11	-3.625e-11	-4.0625e-11	-3.875e-11	-4.09375e-11	-4.59375e-11	-4.0625e-11	-3.8125e-11	-3.9375e-11	-4.0625e-11	-3.84375e-11
-7.78125e-11	-7.34375e-11	-6.78125e-11	-5.9375e-11	-5.9375e-11	-6.40625e-11	-5.59375e-11	-5.4375e-11	-6.84375e-11	-5.5e-11	-5.59375e-11	-6.0625e-11	-5.96875e-11		-4.625e-11	-4.375e-11	-4.03125e-11	-3.78125e-11	-4.40625e-11	-4.40625e-11	-4.09375e-11	-4.28125e-11	-4.53125e-11	-3.78125e-11	-4.28125e-11	-3.6875e-11	-3.5625e-11
-7.125e-11	-7.3125e-11	-6.53125e-11	-5.8125e-11	-5.5625e-11	-6.375e-11	-5.15625e-11	-6.53125e-11	-5.65625e-11	-5.5e-11	-6.21875e-11	-5.78125e-11	-5.28125e-11		-4.03125e-11	-4.625e-11	-4.5e-11	-4.53125e-11	-4.4375e-11	-4.21875e-11	-4.3125e-11	-4.59375e-11	-3.9375e-11	-3.65625e-11	-3.9375e-11	-3.75e-11	-3.65625e-11
-7.6875e-11	-7.09375e-11	-7.3125e-11	-6.3125e-11	-5.46875e-11	-6.46875e-11	-5.96875e-11	-6.28125e-11	-5.8125e-11	-6.0625e-11	-5.40625e-11	-6.59375e-11	-5.4375e-11		-3.875e-11	-4.1875e-11	-4.1875e-11	-4.09375e-11	-4.03125e-11	-4.09375e-11	-4.5e-11	-4.53125e-11	-3.78125e-11	-3.59375e-11	-4.15625e-11	-4.03125e-11	-3.46875e-11
-8.28125e-11	-7.5e-11	-6.625e-11	-6.65625e-11	-5.03125e-11	-5.96875e-11	-4.71875e-11	-6.53125e-11	-6.3125e-11	-5.8125e-11	-6e-11	-6.28125e-11	-5.625e-11		-4.5625e-11	-4.53125e-11	-3.65625e-11	-3.84375e-11	-3.9375e-11	-3.9375e-11	-4.40625e-11	-4.53125e-11	-4.03125e-11	-3.90625e-11	-4.1875e-11	-4.03125e-11	-3.96875e-11
-8.0625e-11	-7.28125e-11	-6.53125e-11	-6.1875e-11	-5.34375e-11	-5.65625e-11	-5.5625e-11	-6.46875e-11	-6.375e-11	-5.5e-11	-5.75e-11	-6.03125e-11	-5.59375e-11		-4.53125e-11	-4.46875e-11	-3.84375e-11	-3.8125e-11	-4.03125e-11	-4.125e-11	-4.46875e-11	-4.46875e-11	-4.15625e-11	-3.71875e-11	-3.84375e-11	-3.8125e-11	-3.90625e-11
-7.3125e-11	-7.09375e-11	-6.5e-11	-5.8125e-11	-5.15625e-11	-6.34375e-11	-5e-11	-6.1875e-11	-6.90625e-11	-6.15625e-11	-5.28125e-11	-6.78125e-11	-5.15625e-11		-4.09375e-11	-4.34375e-11	-4.5e-11	-4.09375e-11	-3.375e-11	-3.96875e-11	-3.40625e-11	-4.625e-11	-4.21875e-11	-4.1875e-11	-4.125e-11	-3.875e-11	-3.53125e-11
-7.3125e-11	-6.4375e-11	-6.84375e-11	-5.9375e-11	-6.0625e-11	-6.21875e-11	-5.5e-11	-6.3125e-11	-6.46875e-11	-6.03125e-11	-5.4375e-11	-6.28125e-11	-5.71875e-11		-3.875e-11	-4.53125e-11	-4.53125e-11	-4.09375e-11	-4.03125e-11	-3.28125e-11	-3.5625e-11	-5.09375e-11	-4.03125e-11	-3.9375e-11	-4.0625e-11	-4.03125e-11	-3.3125e-11
-7.5e-11	-6.34375e-11	-6.9375e-11	-5.9375e-11	-5.65625e-11	-5.71875e-11	-5.40625e-11	-6.34375e-11	-6.5e-11	-6.375e-11	-6.1875e-11	-6.75e-11	-6.28125e-11		-4.1875e-11	-4.46875e-11	-4.25e-11	-4.53125e-11	-4.375e-11	-3.75e-11	-4.03125e-11	-4.78125e-11	-4.1875e-11	-4.1875e-11	-3.84375e-11	-3.65625e-11	-3.53125e-11
-7.21875e-11	-6.5625e-11	-7.03125e-11	-5.71875e-11	-5.15625e-11	-6.40625e-11	-4.6875e-11	-6.03125e-11	-6.4375e-11	-6e-11	-5.84375e-11	-6.5e-11	-5.46875e-11		-4.40625e-11	-4.34375e-11	-3.96875e-11	-4.15625e-11	-4.5625e-11	-3.625e-11	-4.0625e-11	-3.84375e-11	-4.09375e-11	-3.71875e-11	-3.53125e-11	-3.5e-11	-4.03125e-11
-7.59375e-11	-7e-11	-7.03125e-11	-6.4375e-11	-5.875e-11	-6.25e-11	-5.46875e-11	-6.34375e-11	-6.5e-11	-5.6875e-11	-5.8125e-11	-6.15625e-11	-5.75e-11		-4.40625e-11	-4.1875e-11	-4.4375e-11	-4.09375e-11	-4.03125e-11	-3.75e-11	-3.78125e-11	-3.75e-11	-4.09375e-11	-4.03125e-11	-4.21875e-11	-3.875e-11	-3.46875e-11
-8.21875e-11	-6.78125e-11	-7.03125e-11	-6.46875e-11	-5.375e-11	-6.34375e-11	-5.4375e-11	-6.25e-11	-6.4375e-11	-6.03125e-11	-6e-11	-5.65625e-11	-5.75e-11		-4.3125e-11	-4.3125e-11	-4.28125e-11	-3.78125e-11	-4.15625e-11	-4.28125e-11	-4.09375e-11	-3.875e-11	-4.125e-11	-4.53125e-11	-4.53125e-11	-4.15625e-11	-3.53125e-11
-7.625e-11	-6.46875e-11	-7.15625e-11	-5.59375e-11	-5.65625e-11	-6.03125e-11	-5.03125e-11	-6.5e-11	-6.6875e-11	-5.78125e-11	-6.0625e-11	-7e-11	-6.125e-11		-4.5e-11	-4.09375e-11	-4.03125e-11	-3.84375e-11	-4.125e-11	-4.1875e-11	-4.40625e-11	-4.53125e-11	-4.09375e-11	-4.28125e-11	-4.09375e-11	-3.84375e-11	-3.78125e-11
-7.25e-11	-6.65625e-11	-6.53125e-11	-5.34375e-11	-6e-11	-5.5e-11	-5.53125e-11	-6.375e-11	-6.21875e-11	-6.15625e-11	-5.84375e-11	-5.78125e-11	-5.96875e-11		-4.84375e-11	-4.03125e-11	-3.84375e-11	-4.0625e-11	-4.34375e-11	-4.1875e-11	-4.40625e-11	-4.78125e-11	-3.84375e-11	-4.5e-11	-3.90625e-11	-3.65625e-11	-4.21875e-11
-7.78125e-11	-6.71875e-11	-7.15625e-11	-5.875e-11	-5.78125e-11	-5.96875e-11	-5.8125e-11	-5.9375e-11	-6.84375e-11	-6.03125e-11	-5.6875e-11	-6.625e-11	-5.625e-11		-4.625e-11	-4.4375e-11	-3.9375e-11	-4.03125e-11	-4.125e-11	-4.40625e-11	-4.28125e-11	-4.875e-11	-3.875e-11	-4.5625e-11	-3.78125e-11	-4.03125e-11	-4.125e-11
-7.59375e-11	-6.8125e-11	-7.0625e-11	-6e-11	-6.125e-11	-5.59375e-11	-5.6875e-11	-6.3125e-11	-6.84375e-11	-5.78125e-11	-5.90625e-11	-6.34375e-11	-6.375e-11		-4.5e-11	-4.71875e-11	-4.25e-11	-3.5e-11	-4.15625e-11	-4.65625e-11	-4.0625e-11	-4.9375e-11	-3.78125e-11	-3.75e-11	-3.75e-11	-3.90625e-11	-3.78125e-11
-7.78125e-11	-6.46875e-11	-7.46875e-11	-5.875e-11	-5.75e-11	-5.84375e-11	-5.28125e-11	-5.625e-11	-6.96875e-11	-5.40625e-11	-5.03125e-11	-5.46875e-11	-6.15625e-11		-4.625e-11	-4.375e-11	-4.40625e-11	-3.8125e-11	-4.34375e-11	-4.3125e-11	-3.90625e-11	-4.53125e-11	-3.84375e-11	-3.375e-11	-4.09375e-11	-3.65625e-11	-3.9375e-11
-7.65625e-11	-7e-11	-7.03125e-11	-6.4375e-11	-5.5e-11	-6.03125e-11	-5.125e-11	-6.34375e-11	-6.15625e-11	-5.8125e-11	-6.09375e-11	-6.625e-11	-5.46875e-11		-4.28125e-11	-4.34375e-11	-4.5e-11	-4.65625e-11	-4.09375e-11	-3.90625e-11	-3.8125e-11	-3.84375e-11	-4.28125e-11	-3.5625e-11	-3.28125e-11	-3.625e-11	-3.375e-11
-7.5e-11	-7.09375e-11	-6.625e-11	-6.15625e-11	-5.96875e-11	-6.21875e-11	-5e-11	-6.1875e-11	-6.28125e-11	-5.9375e-11	-6.15625e-11	-6.03125e-11	-6.09375e-11		-4.40625e-11	-4.34375e-11	-4.03125e-11	-4.28125e-11	-4.53125e-11	-3.96875e-11	-4.03125e-11	-4.15625e-11	-4.03125e-11	-3.8125e-11	-3.5625e-11	-3.5e-11	-4.03125e-11
-7.46875e-11	-6.96875e-11	-6.96875e-11	-5.1875e-11	-5.75e-11	-5.59375e-11	-6.03125e-11	-6.71875e-11	-6.4375e-11	-6.09375e-11	-5.78125e-11	-6.5e-11	-5.6875e-11		-4.34375e-11	-4.65625e-11	-4.46875e-11	-3.71875e-11	-4.59375e-11	-4.1875e-11	-3.875e-11	-4.09375e-11	-4.4375e-11	-3.625e-11	-3.84375e-11	-4.09375e-11	-3.40625e-11
-7.65625e-11	-6.65625e-11	-6.9375e-11	-5.96875e-11	-5.03125e-11	-5.625e-11	-5.875e-11	-5.65625e-11	-6.4375e-11	-6.28125e-11	-6.125e-11	-6.0625e-11	-5.71875e-11		-3.90625e-11	-4.75e-11	-4.40625e-11	-3.78125e-11	-4.78125e-11	-4.34375e-11	-3.96875e-11	-4.5e-11	-4.46875e-11	-3.75e-11	-3.90625e-11	-3.46875e-11	-3.5e-11
-6.59375e-11	-7.34375e-11	-7.40625e-11	-6.5e-11	-5.96875e-11	-6.46875e-11	-5.15625e-11	-6e-11	-6.21875e-11	-6.46875e-11	-6.4375e-11	-6.28125e-11	-6.28125e-11		-4.28125e-11	-4.84375e-11	-4.5625e-11	-3.9375e-11	-4.34375e-11	-4.65625e-11	-3.8125e-11	-4.625e-11	-4.21875e-11	-3.5625e-11	-4.0625e-11	-4.34375e-11	-3.84375e-11
-7.03125e-11	-7.15625e-11	-7.15625e-11	-5.625e-11	-5.84375e-11	-6.28125e-11	-5.75e-11	-6.34375e-11	-5.8125e-11	-5.65625e-11	-5.78125e-11	-6.34375e-11	-5.1875e-11		-4.71875e-11	-4.4375e-11	-4.3125e-11	-3.875e-11	-4.4375e-11	-4.5e-11	-4.1875e-11	-4.84375e-11	-3.78125e-11	-3.28125e-11	-4.09375e-11	-4.0625e-11	-3.53125e-11
-8.03125e-11	-6.71875e-11	-7.34375e-11	-6.53125e-11	-5.53125e-11	-6.25e-11	-5.09375e-11	-5.53125e-11	-6.0625e-11	-5.90625e-11	-5.96875e-11	-6.03125e-11	-5.96875e-11		-4.5e-11	-4.53125e-11	-4.375e-11	-4.28125e-11	-4.34375e-11	-4.0625e-11	-4.375e-11	-4.21875e-11	-4.34375e-11	-3.25e-11	-3.78125e-11	-3.375e-11	-4.34375e-11
-7.09375e-11	-6.5e-11	-6.875e-11	-6.46875e-11	-5.375e-11	-6.46875e-11	-5.34375e-11	-5.40625e-11	-6.53125e-11	-5.84375e-11	-5.53125e-11	-5.65625e-11	-5.5625e-11		-4.09375e-11	-4.46875e-11	-4.4375e-11	-4.375e-11	-4.3125e-11	-3.71875e-11	-4.375e-11	-3.8125e-11	-4.46875e-11	-3.71875e-11	-3.5e-11	-3.28125e-11	-4.15625e-11
-7.78125e-11	-7.3125e-11	-6.59375e-11	-5.875e-11	-6.15625e-11	-5.6875e-11	-5.34375e-11	-5.78125e-11	-6.96875e-11	-4.71875e-11	-6.40625e-11	-6.09375e-11	-5.53125e-11		-3.71875e-11	-4.40625e-11	-4.46875e-11	-4.1875e-11	-4.3125e-11	-4.03125e-11	-4.1875e-11	-4.625e-11	-4.25e-11	-4.28125e-11	-4.03125e-11	-4.09375e-11	-3.71875e-11
-8.125e-11	-7.78125e-11	-7.03125e-11	-5.8125e-11	-5.15625e-11	-6.1875e-11	-5.53125e-11	-6.0625e-11	-5.8125e-11	-6.28125e-11	-5.71875e-11	-6.15625e-11	-5.25e-11		-4.03125e-11	-4.5e-11	-4.03125e-11	-4.1875e-11	-3.84375e-11	-3.8125e-11	-3.90625e-11	-4.6875e-11	-4.59375e-11	-4.375e-11	-4.3125e-11	-3.9375e-11	-3.5e-11
-7.5625e-11	-6.96875e-11	-6.5625e-11	-5.78125e-11	-5.6875e-11	-6.5625e-11	-5.59375e-11	-6.90625e-11	-6.03125e-11	-5.1875e-11	-5.875e-11	-6.28125e-11	-6.03125e-11		-4.53125e-11	-4.21875e-11	-4.15625e-11	-3.84375e-11	-3.9375e-11	-3.78125e-11	-4.03125e-11	-4.6875e-11	-4.03125e-11	-4.0625e-11	-3.71875e-11	-3.78125e-11	-3.875e-11
-7.03125e-11	-6.5e-11	-6.0625e-11	-6.03125e-11	-5.8125e-11	-6.1875e-11	-5.6875e-11	-6.71875e-11	-5.75e-11	-5.3125e-11	-5.84375e-11	-6.5625e-11	-5.53125e-11		-4.78125e-11	-4.0625e-11	-4.28125e-11	-4.1875e-11	-4.34375e-11	-4.15625e-11	-4.1875e-11	-4.78125e-11	-4.3125e-11	-4.03125e-11	-4.09375e-11	-3.8125e-11	-3.65625e-11
-8.28125e-11	-7.21875e-11	-6.875e-11	-5.78125e-11	-4.9375e-11	-5.8125e-11	-5.59375e-11	-5.65625e-11	-6.03125e-11	-6.1875e-11	-5.28125e-11	-5.65625e-11	-6.09375e-11		-4.28125e-11	-4.21875e-11	-3.9375e-11	-4.03125e-11	-3.65625e-11	-3.78125e-11	-4.0625e-11	-4.1875e-11	-4.46875e-11	-4.5e-11	-4.03125e-11	-3.53125e-11	-3.4375e-11
-7.5e-11	-7.09375e-11	-6.6875e-11	-5.78125e-11	-5.8125e-11	-6.46875e-11	-6.3125e-11	-6.375e-11	-6.875e-11	-5.53125e-11	-5.78125e-11	-5.84375e-11	-5.28125e-11		-4.5e-11	-4.3125e-11	-4.03125e-11	-4.03125e-11	-4.09375e-11	-4.03125e-11	-4.40625e-11	-3.90625e-11	-4.03125e-11	-3.90625e-11	-4.09375e-11	-3.8125e-11	-3.8125e-11
-7.09375e-11	-6.4375e-11	-7.4375e-11	-5.5625e-11	-5.21875e-11	-6.21875e-11	-5.9375e-11	-6.375e-11	-6.125e-11	-6.15625e-11	-6.46875e-11	-6.875e-11	-5.5e-11		-4.34375e-11	-3.9375e-11	-4.5e-11	-4.34375e-11	-4.34375e-11	-3.9375e-11	-4.4375e-11	-4.34375e-11	-3.53125e-11	-3.40625e-11	-3.78125e-11	-3.65625e-11	-3.375e-11
-8.21875e-11	-7e-11	-6.3125e-11	-5.53125e-11	-5.34375e-11	-6.28125e-11	-6.03125e-11	-5.96875e-11	-6.5625e-11	-5.9375e-11	-6.28125e-11	-6.15625e-11	-5.8125e-11		-3.65625e-11	-3.9375e-11	-4.34375e-11	-4.21875e-11	-5e-11	-4.03125e-11	-4.03125e-11	-4.34375e-11	-4.125e-11	-3.625e-11	-3.34375e-11	-3.90625e-11	-3.3125e-11
-6.78125e-11	-7.0625e-11	-6.65625e-11	-6.15625e-11	-5.46875e-11	-5.71875e-11	-5.59375e-11	-6.125e-11	-6.65625e-11	-5.65625e-11	-5.875e-11	-6.28125e-11	-5.375e-11		-3.78125e-11	-4.40625e-11	-4.09375e-11	-4.1875e-11	-4.4375e-11	-3.5625e-11	-3.65625e-11	-4.25e-11	-3.78125e-11	-3.59375e-11	-3.5e-11	-4.1875e-11	-3.5e-11
-7.65625e-11	-6.71875e-11	-6.71875e-11	-5.9375e-11	-5.65625e-11	-6.1875e-11	-5.78125e-11	-6.0625e-11	-5.78125e-11	-5.03125e-11	-5.96875e-11	-6.09375e-11	-5.28125e-11		-3.71875e-11	-5.03125e-11	-4.21875e-11	-4.03125e-11	-3.71875e-11	-3.375e-11	-3.625e-11	-4.5625e-11	-4.40625e-11	-3.625e-11	-4.4375e-11	-3.59375e-11	-4.03125e-11
-6.9375e-11	-7.34375e-11	-6.1875e-11	-5.84375e-11	-5.96875e-11	-5.65625e-11	-5.28125e-11	-6e-11	-7.15625e-11	-5.8125e-11	-5.90625e-11	-6.40625e-11	-5.5e-11		-4.25e-11	-4.5e-11	-4.59375e-11	-3.71875e-11	-4.5e-11	-4.15625e-11	-4.03125e-11	-4.40625e-11	-4.46875e-11	-4.03125e-11	-4e-11	-3.59375e-11	-3.65625e-11
-7.28125e-11	-6.8125e-11	-6.53125e-11	-6.0625e-11	-5.53125e-11	-5.65625e-11	-5.5e-11	-6.28125e-11	-5.96875e-11	-5.65625e-11	-6.3125e-11	-6.15625e-11	-5.5625e-11		-4.03125e-11	-4.4375e-11	-4.21875e-11	-3.8125e-11	-4.53125e-11	-4.375e-11	-3.8125e-11	-4.3125e-11	-3.5625e-11	-3.84375e-11	-3.53125e-11	-3.78125e-11	-4.21875e-11
-7.40625e-11	-7.28125e-11	-7.46875e-11	-6.21875e-11	-5.375e-11	-6.03125e-11	-5.8125e-11	-6.0625e-11	-6.78125e-11	-5.15625e-11	-5.84375e-11	-6.78125e-11	-5.5e-11		-4.46875e-11	-4.5e-11	-3.5e-11	-4.0625e-11	-4.25e-11	-4.03125e-11	-3.28125e-11	-4.65625e-11	-3.90625e-11	-3.5625e-11	-4.1875e-11	-4.09375e-11	-3.875e-11
-7.09375e-11	-6.96875e-11	-5.9375e-11	-5.78125e-11	-5.46875e-11	-6.84375e-11	-5.9375e-11	-6.375e-11	-6.40625e-11	-6.3125e-11	-5.90625e-11	-6.5625e-11	-5.375e-11		-4.59375e-11	-4.59375e-11	-3.6875e-11	-4.09375e-11	-4.53125e-11	-3.90625e-11	-4.1875e-11	-4.53125e-11	-3.5e-11	-3.84375e-11	-4.3125e-11	-4.15625e-11	-3.875e-11
-8.03125e-11	-6.46875e-11	-6.65625e-11	-4.84375e-11	-5.3125e-11	-6.3125e-11	-5.5625e-11	-6.09375e-11	-5.9375e-11	-6.34375e-11	-6.4375e-11	-6.34375e-11	-6.15625e-11		-4.53125e-11	-4.3125e-11	-4.1875e-11	-4.3125e-11	-4.28125e-11	-3.90625e-11	-4.0625e-11	-4.875e-11	-4.0625e-11	-4.28125e-11	-4.09375e-11	-3.5625e-11	-3.375e-11
-7.5625e-11	-7.375e-11	-5.9375e-11	-5.71875e-11	-6e-11	-6.03125e-11	-6.5625e-11	-6.6875e-11	-6.65625e-11	-5.875e-11	-6.25e-11	-6e-11	-5.15625e-11		-4.78125e-11	-4.9375e-11	-4.28125e-11	-4.375e-11	-4.0625e-11	-3.90625e-11	-3.5625e-11	-4.5e-11	-4.65625e-11	-4.09375e-11	-4.03125e-11	-3.0625e-11	-3.0625e-11
-7.625e-11	-6.65625e-11	-6.375e-11	-6.34375e-11	-6.46875e-11	-6.21875e-11	-5.90625e-11	-6.15625e-11	-6.5625e-11	-5.84375e-11	-5.84375e-11	-6.34375e-11	-6.21875e-11		-4.5e-11	-4.65625e-11	-4.375e-11	-4.03125e-11	-4.15625e-11	-4.03125e-11	-4.5e-11	-5.03125e-11	-4.28125e-11	-3.6875e-11	-3.71875e-11	-3.8125e-11	-3.5e-11
-7.75e-11	-6.5625e-11	-6.25e-11	-5.0625e-11	-5.90625e-11	-5.78125e-11	-5.96875e-11	-6.40625e-11	-6.9375e-11	-5.78125e-11	-5.65625e-11	-6.03125e-11	-5.9375e-11		-4.28125e-11	-4.09375e-11	-4.28125e-11	-4.375e-11	-4.28125e-11	-4.03125e-11	-4.5625e-11	-4.46875e-11	-3.90625e-11	-3.6875e-11	-3.40625e-11	-3.875e-11	-3.9375e-11
-7.0625e-11	-7.09375e-11	-6.6875e-11	-5.78125e-11	-5.71875e-11	-6.40625e-11	-6.75e-11	-5.9375e-11	-6.5e-11	-5.875e-11	-5.875e-11	-6.46875e-11	-5.15625e-11		-4.65625e-11	-4.125e-11	-4.0625e-11	-4.0625e-11	-5e-11	-3.8125e-11	-4.28125e-11	-3.65625e-11	-3.53125e-11	-3.75e-11	-3.28125e-11	-3.6875e-11	-4.21875e-11
-7.3125e-11	-7.03125e-11	-6.03125e-11	-6.09375e-11	-4.90625e-11	-6.15625e-11	-5.15625e-11	-6.65625e-11	-5.84375e-11	-5.6875e-11	-5.25e-11	-6.59375e-11	-5.9375e-11		-4.21875e-11	-4.65625e-11	-3.875e-11	-3.65625e-11	-4.03125e-11	-3.9375e-11	-4.1875e-11	-4.0625e-11	-3.53125e-11	-4.28125e-11	-3.71875e-11	-4.28125e-11	-3.71875e-11
-6.65625e-11	-6.9375e-11	-6.9375e-11	-5.4375e-11	-6.75e-11	-6.65625e-11	-5.8125e-11	-6.375e-11	-6.53125e-11	-6.125e-11	-6.28125e-11	-6.46875e-11	-5e-11		-4.4375e-11	-4.3125e-11	-3.5625e-11	-4.25e-11	-3.9375e-11	-4.03125e-11	-4.15625e-11	-4.3125e-11	-4.03125e-11	-4.1875e-11	-3.46875e-11	-3.53125e-11	-3.40625e-11
-6.75e-11	-5.71875e-11	-6.5e-11	-5.625e-11	-5.40625e-11	-5.5625e-11	-5.78125e-11	-6.34375e-11	-5.90625e-11	-6.34375e-11	-6.375e-11	-6.375e-11	-5.5e-11		-4.6875e-11	-4.34375e-11	-4.1875e-11	-4.1875e-11	-4.46875e-11	-3.59375e-11	-3.34375e-11	-4.9375e-11	-4.03125e-11	-4.03125e-11	-4.03125e-11	-3.59375e-11	-3.09375e-11
-7.625e-11	-7.53125e-11	-6.71875e-11	-5.6875e-11	-5.53125e-11	-6.15625e-11	-5.4375e-11	-6.21875e-11	-6.96875e-11	-6.375e-11	-5.96875e-11	-5.90625e-11	-5.53125e-11		-5.03125e-11	-4.875e-11	-4.4375e-11	-4.3125e-11	-4.65625e-11	-3.8125e-11	-3.78125e-11	-4.75e-11	-4.3125e-11	-4.03125e-11	-4.46875e-11	-3.5e-11	-3.5e-11
-7.1875e-11	-6.40625e-11	-6.6875e-11	-6.21875e-11	-5.78125e-11	-6.375e-11	-5.21875e-11	-6.5e-11	-6.65625e-11	-5.65625e-11	-5.84375e-11	-5.59375e-11	-5.8125e-11		-4.375e-11	-4.40625e-11	-4.15625e-11	-4.375e-11	-4.75e-11	-3.75e-11	-4.375e-11	-4.875e-11	-4.15625e-11	-4.03125e-11	-4.03125e-11	-3.625e-11	-3.875e-11
-7.15625e-11	-7.65625e-11	-7.21875e-11	-5.40625e-11	-6.09375e-11	-6.03125e-11	-5.78125e-11	-6.625e-11	-6.71875e-11	-5.71875e-11	-6.09375e-11	-7e-11	-5.5e-11		-4.1875e-11	-4.4375e-11	-4.15625e-11	-3.84375e-11	-4.28125e-11	-3.8125e-11	-5e-11	-5e-11	-3.84375e-11	-3.59375e-11	-3.84375e-11	-3.65625e-11	-3.8125e-11
-7.875e-11	-6.75e-11	-5.96875e-11	-6.3125e-11	-5.5625e-11	-5.625e-11	-5.78125e-11	-6.4375e-11	-6.625e-11	-6.15625e-11	-6.25e-11	-6.75e-11	-6.1875e-11		-4.53125e-11	-4.53125e-11	-4.65625e-11	-4.03125e-11	-4.03125e-11	-3.9375e-11	-4.59375e-11	-5e-11	-3.59375e-11	-4.03125e-11	-4.15625e-11	-3.78125e-11	-3.9375e-11
-7.25e-11	-7.0625e-11	-6.9375e-11	-5.53125e-11	-5.5e-11	-6.40625e-11	-5.53125e-11	-6.8125e-11	-6.96875e-11	-6.28125e-11	-6.15625e-11	-6.84375e-11	-4.875e-11		-4.15625e-11	-4.21875e-11	-4.5e-11	-3.84375e-11	-4.03125e-11	-3.6875e-11	-4.03125e-11	-4.375e-11	-3.59375e-11	-3.90625e-11	-4.03125e-11	-4.3125e-11	-4.34375e-11
-7.28125e-11	-6.5625e-11	-6.03125e-11	-6.1875e-11	-5.34375e-11	-6.28125e-11	-5.03125e-11	-5.96875e-11	-7.03125e-11	-5.5e-11	-5.6875e-11	-6.28125e-11	-4.96875e-11		-4.46875e-11	-4.84375e-11	-4.3125e-11	-4.6875e-11	-3.90625e-11	-4.03125e-11	-4.09375e-11	-3.90625e-11	-4.1875e-11	-4.09375e-11	-3.6875e-11	-3.96875e-11	-3.65625e-11
-7.375e-11	-6.53125e-11	-6.46875e-11	-5.84375e-11	-5.1875e-11	-6.03125e-11	-6.15625e-11	-6.25e-11	-6.96875e-11	-6.0625e-11	-5.84375e-11	-6.5e-11	-5.875e-11		-4.9375e-11	-4.53125e-11	-4.65625e-11	-4.09375e-11	-4.15625e-11	-4.21875e-11	-4.1875e-11	-4.40625e-11	-4.03125e-11	-4.375e-11	-3.8125e-11	-3.53125e-11	-3.34375e-11
-7.5e-11	-6.5625e-11	-6.5e-11	-5.40625e-11	-5.78125e-11	-5.9375e-11	-5.4375e-11	-6.28125e-11	-6.8125e-11	-5.5e-11	-5.6875e-11	-6.5e-11	-5.9375e-11		-4.34375e-11	-4.34375e-11	-4.03125e-11	-3.78125e-11	-4.28125e-11	-3.9375e-11	-3.8125e-11	-4.5625e-11	-3.71875e-11	-3.59375e-11	-3.6875e-11	-3.65625e-11	-3.875e-11
-8.15625e-11	-6.90625e-11	-6.59375e-11	-5.53125e-11	-5.40625e-11	-5.5625e-11	-5.8125e-11	-6.34375e-11	-6.28125e-11	-5.90625e-11	-6.375e-11	-6.4375e-11	-5.75e-11		-3.75e-11	-3.9375e-11	-4.21875e-11	-4.09375e-11	-4.03125e-11	-4.03125e-11	-3.53125e-11	-4.375e-11	-4.0625e-11	-4.15625e-11	-3.5e-11	-3.5e-11	-3.75e-11
-7.84375e-11	-7.09375e-11	-6.78125e-11	-5.9375e-11	-5.1875e-11	-5.875e-11	-6.03125e-11	-6.125e-11	-7e-11	-6.3125e-11	-6.375e-11	-5.9375e-11	-5.75e-11		-3.59375e-11	-4.53125e-11	-4.15625e-11	-4.15625e-11	-4.65625e-11	-3.71875e-11	-3.90625e-11	-4.09375e-11	-4.40625e-11	-3.84375e-11	-3e-11	-3.5e-11	-3.5e-11
-7.34375e-11	-7.15625e-11	-6.53125e-11	-6.03125e-11	-5.625e-11	-5.84375e-11	-5.25e-11	-6.09375e-11	-6.15625e-11	-6.46875e-11	-6.09375e-11	-6.71875e-11	-5.625e-11		-4.21875e-11	-4.65625e-11	-4.71875e-11	-3.8125e-11	-4.375e-11	-3.84375e-11	-4.09375e-11	-4.5625e-11	-3.71875e-11	-3.84375e-11	-3.875e-11	-3.125e-11	-3.40625e-11
-7.09375e-11	-7.3125e-11	-6.53125e-11	-5.15625e-11	-4.96875e-11	-5.8125e-11	-5.0625e-11	-5.78125e-11	-6.875e-11	-6.21875e-11	-6.5625e-11	-6.59375e-11	-6.1875e-11		-4.375e-11	-4.5e-11	-4.25e-11	-3.78125e-11	-3.90625e-11	-3.71875e-11	-4.75e-11	-4.46875e-11	-3.96875e-11	-4.21875e-11	-3.90625e-11	-3.1875e-11	-3.96875e-11
-7.15625e-11	-6.34375e-11	-6.59375e-11	-5.3125e-11	-5.78125e-11	-6.71875e-11	-5.59375e-11	-6.71875e-11	-6.6875e-11	-5.65625e-11	-5.65625e-11	-5.875e-11	-5.28125e-11		-4.28125e-11	-4.5e-11	-4.21875e-11	-3.90625e-11	-4.15625e-11	-4.34375e-11	-3.71875e-11	-4.5e-11	-4.59375e-11	-3.84375e-11	-3.6875e-11	-3.90625e-11	-3.8125e-11
-7.96875e-11	-7.03125e-11	-7.03125e-11	-5.46875e-11	-6.46875e-11	-6.6875e-11	-5.875e-11	-6.34375e-11	-6.34375e-11	-5.28125e-11	-6.71875e-11	-6.15625e-11	-5.84375e-11		-4.40625e-11	-4.5e-11	-3.6875e-11	-4.0625e-11	-4.28125e-11	-4.4375e-11	-4.03125e-11	-4.375e-11	-4.625e-11	-3.53125e-11	-4.15625e-11	-3.34375e-11	-3.59375e-11
-6.96875e-11	-6.9375e-11	-6.5625e-11	-5.5625e-11	-5.8125e-11	-6.5625e-11	-6.34375e-11	-6.59375e-11	-6.71875e-11	-5.8125e-11	-6.4375e-11	-6.53125e-11	-6.40625e-11		-4.0625e-11	-4.8125e-11	-3.6875e-11	-4.15625e-11	-4.15625e-11	-4.3125e-11	-3.6875e-11	-4.6875e-11	-4.15625e-11	-3.8125e-11	-4.03125e-11	-3.4375e-11	-3.9375e-11
-6.84375e-11	-7.75e-11	-7.3125e-11	-5.09375e-11	-5.5e-11	-6.34375e-11	-6.09375e-11	-6.59375e-11	-6.84375e-11	-5.90625e-11	-6.03125e-11	-6.28125e-11	-5.5625e-11		-4.4375e-11	-4.5e-11	-3.78125e-11	-4.25e-11	-4.46875e-11	-4.0625e-11	-4.09375e-11	-4.21875e-11	-4.375e-11	-4.0625e-11	-4.03125e-11	-3.46875e-11	-4.125e-11
-6.71875e-11	-6.34375e-11	-7e-11	-5.15625e-11	-6.09375e-11	-6.28125e-11	-5.84375e-11	-6.53125e-11	-6.34375e-11	-6.375e-11	-5.96875e-11	-6.15625e-11	-5.78125e-11		-4.5e-11	-4.0625e-11	-4.34375e-11	-4.03125e-11	-4.375e-11	-4.03125e-11	-4.15625e-11	-4.40625e-11	-4.46875e-11	-3.78125e-11	-4.28125e-11	-3.90625e-11	-4.15625e-11
-7.90625e-11	-6.59375e-11	-7.21875e-11	-6.15625e-11	-5.28125e-11	-6.1875e-11	-5.6875e-11	-5.84375e-11	-5.59375e-11	-6.59375e-11	-6.53125e-11	-6.1875e-11	-5.5625e-11		-4.53125e-11	-4.6875e-11	-4.5625e-11	-3.71875e-11	-4.65625e-11	-3.84375e-11	-4.25e-11	-4.03125e-11	-3.875e-11	-3.96875e-11	-3.65625e-11	-4.375e-11	-3.59375e-11
-7.53125e-11	-7.5e-11	-6.59375e-11	-5.34375e-11	-5.6875e-11	-5.71875e-11	-5.40625e-11	-6.65625e-11	-6.03125e-11	-6.25e-11	-6.78125e-11	-5.8125e-11	-5.59375e-11		-4.15625e-11	-4.4375e-11	-4.21875e-11	-3.6875e-11	-4.15625e-11	-3.9375e-11	-4.03125e-11	-4.28125e-11	-3.59375e-11	-3.53125e-11	-3.6875e-11	-3.5625e-11	-3.53125e-11
-6.59375e-11	-6.96875e-11	-6.5625e-11	-5.5625e-11	-5.71875e-11	-5.9375e-11	-5.5e-11	-6.3125e-11	-7.15625e-11	-6.3125e-11	-6.3125e-11	-5.90625e-11	-5.65625e-11		-4.21875e-11	-4.5e-11	-3.875e-11	-4.03125e-11	-4.1875e-11	-3.65625e-11	-3.65625e-11	-3.875e-11	-3.96875e-11	-3.875e-11	-3.84375e-11	-3.59375e-11	-3.125e-11
-8.03125e-11	-7.15625e-11	-7.03125e-11	-5.59375e-11	-5.75e-11	-6.09375e-11	-6.1875e-11	-6.53125e-11	-6.53125e-11	-5.65625e-11	-5.90625e-11	-6.15625e-11	-5.90625e-11		-4.40625e-11	-4.40625e-11	-4.34375e-11	-3.9375e-11	-3.8125e-11	-4.03125e-11	-4.25e-11	-4.25e-11	-4.5625e-11	-3.96875e-11	-4.03125e-11	-3.90625e-11	-3.09375e-11
-7.6875e-11	-6.5e-11	-6.75e-11	-5.53125e-11	-6.5625e-11	-6.625e-11	-6.28125e-11	-6.4375e-11	-6.71875e-11	-6.3125e-11	-6.1875e-11	-5.90625e-11	-5.25e-11		-4.4375e-11	-4.59375e-11	-3.84375e-11	-4.59375e-11	-4.625e-11	-4.40625e-11	-3.875e-11	-4.46875e-11	-3.96875e-11	-3.84375e-11	-3.8125e-11	-3.96875e-11	-3.5625e-11
-6.8125e-11	-6.65625e-11	-7.03125e-11	-5.65625e-11	-5.28125e-11	-5.8125e-11	-6.09375e-11	-6.34375e-11	-6.625e-11	-5.96875e-11	-6.46875e-11	-6.25e-11	-5.15625e-11		-4.75e-11	-4.6875e-11	-4.28125e-11	-4.46875e-11	-4.125e-11	-3.96875e-11	-3.5625e-11	-4.15625e-11	-4.28125e-11	-3.90625e-11	-3.65625e-11	-4.09375e-11	-3.6875e-11
-7.21875e-11	-6.65625e-11	-6.5625e-11	-5.4375e-11	-5.625e-11	-5.34375e-11	-5.90625e-11	-6.40625e-11	-6.6875e-11	-5.65625e-11	-6.1875e-11	-5.65625e-11	-5.625e-11		-4.40625e-11	-4.46875e-11	-4.09375e-11	-4.28125e-11	-4.09375e-11	-3.84375e-11	-4.15625e-11	-4.28125e-11	-4.09375e-11	-3.375e-11	-4.03125e-11	-3.96875e-11	-3.78125e-11
-7.90625e-11	-6.8125e-11	-7.15625e-11	-5.5625e-11	-5.125e-11	-5.8125e-11	-5.59375e-11	-5.78125e-11	-6.15625e-11	-6.46875e-11	-5.8125e-11	-6.09375e-11	-5.09375e-11		-4.46875e-11	-4.15625e-11	-4.40625e-11	-4.3125e-11	-4.53125e-11	-4.5625e-11	-4.03125e-11	-4.03125e-11	-4.15625e-11	-3.4375e-11	-3.9375e-11	-4.15625e-11	-3.8125e-11
-7.78125e-11	-6.3125e-11	-7e-11	-5.5625e-11	-5.5625e-11	-6.4375e-11	-5.90625e-11	-6.15625e-11	-7.09375e-11	-6.15625e-11	-6.84375e-11	-6.53125e-11	-5.5625e-11		-4.15625e-11	-4.28125e-11	-4.53125e-11	-4.15625e-11	-4.53125e-11	-4.59375e-11	-3.71875e-11	-4.25e-11	-4.03125e-11	-4.21875e-11	-4.09375e-11	-3.59375e-11	-4.03125e-11
-6.71875e-11	-6.71875e-11	-6.96875e-11	-5.4375e-11	-5.1875e-11	-5.90625e-11	-5.125e-11	-6.28125e-11	-6.15625e-11	-5.65625e-11	-7.40625e-11	-6.40625e-11	-6.0625e-11		-4.21875e-11	-4.21875e-11	-4.5625e-11	-4.1875e-11	-3.65625e-11	-4.03125e-11	-4.21875e-11	-4.1875e-11	-3.65625e-11	-4.4375e-11	-3.90625e-11	-3.28125e-11	-3.6875e-11
-7.09375e-11	-6.5625e-11	-6.5625e-11	-6.03125e-11	-5.59375e-11	-6.5625e-11	-5.96875e-11	-6.40625e-11	-6.78125e-11	-6.15625e-11	-6.5e-11	-5.65625e-11	-4.9375e-11		-4.09375e-11	-4.53125e-11	-4.375e-11	-4.28125e-11	-4.375e-11	-3.9375e-11	-4.84375e-11	-4.5e-11	-3.46875e-11	-4.15625e-11	-4.25e-11	-4.03125e-11	-4.03125e-11
-7.78125e-11	-6.5e-11	-6.5625e-11	-5.34375e-11	-5.75e-11	-6.34375e-11	-6.03125e-11	-6.1875e-11	-6.15625e-11	-6e-11	-6.65625e-11	-5.625e-11	-5.875e-11		-4.34375e-11	-4.4375e-11	-4.03125e-11	-4.03125e-11	-4.3125e-11	-3.875e-11	-4.59375e-11	-4.5625e-11	-3.625e-11	-4.3125e-11	-4.375e-11	-4.09375e-11	-3.90625e-11
-7.3125e-11	-6.5e-11	-6.53125e-11	-5.28125e-11	-6.25e-11	-6.71875e-11	-5.90625e-11	-6.15625e-11	-6.46875e-11	-6.34375e-11	-6.5e-11	-5.875e-11	-5.78125e-11		-4.59375e-11	-3.9375e-11	-3.71875e-11	-4.03125e-11	-4.46875e-11	-3.96875e-11	-4.8125e-11	-5e-11	-3.375e-11	-3.75e-11	-4.03125e-11	-3.625e-11	-3.78125e-11
-7.96875e-11	-6.40625e-11	-7e-11	-6.5e-11	-5.46875e-11	-5.9375e-11	-5.5e-11	-5.96875e-11	-6.125e-11	-5.59375e-11	-5.875e-11	-5.9375e-11	-5.8125e-11		-4.125e-11	-4.25e-11	-4.15625e-11	-4.3125e-11	-4.3125e-11	-4.09375e-11	-4.03125e-11	-4.78125e-11	-3.96875e-11	-3.625e-11	-3.78125e-11	-3.6875e-11	-3.1875e-11
-7.34375e-11	-7.34375e-11	-7.3125e-11	-5.53125e-11	-5.3125e-11	-6.53125e-11	-5.65625e-11	-5.9375e-11	-6.25e-11	-6.21875e-11	-5.96875e-11	-5.90625e-11	-6e-11		-3.46875e-11	-4.1875e-11	-4.40625e-11	-4.34375e-11	-4.4375e-11	-4.03125e-11	-4.34375e-11	-4.34375e-11	-4.28125e-11	-3.6875e-11	-4.03125e-11	-4.03125e-11	-3.5e-11
-7.75e-11	-6.46875e-11	-5.59375e-11	-5.84375e-11	-5.65625e-11	-5.5e-11	-5.375e-11	-6.1875e-11	-6.96875e-11	-5.65625e-11	-6.34375e-11	-5.875e-11	-5.6875e-11		-4.09375e-11	-4.78125e-11	-4.34375e-11	-4.28125e-11	-4.71875e-11	-4.03125e-11	-4.15625e-11	-4.21875e-11	-4.375e-11	-3.46875e-11	-4.28125e-11	-4.15625e-11	-3.59375e-11
-8.3125e-11	-6.5e-11	-6.03125e-11	-5.5e-11	-5.40625e-11	-6.8125e-11	-5.59375e-11	-6.21875e-11	-6.25e-11	-6.15625e-11	-6.1875e-11	-6.09375e-11	-5.71875e-11		-4.3125e-11	-4.75e-11	-5e-11	-4.375e-11	-4.71875e-11	-4.53125e-11	-4.1875e-11	-4.5625e-11	-4.375e-11	-3.65625e-11	-3.875e-11	-4.15625e-11	-4.03125e-11
-7.8125e-11	-6.1875e-11	-6.65625e-11	-5.53125e-11	-5.65625e-11	-6.3125e-11	-5.875e-11	-6.03125e-11	-6.34375e-11	-6.125e-11	-7e-11	-6.65625e-11	-6.15625e-11		-4.125e-11	-4.65625e-11	-4.65625e-11	-4.15625e-11	-4.1875e-11	-4.34375e-11	-4.15625e-11	-3.90625e-11	-4.34375e-11	-3.9375e-11	-3.46875e-11	-4.0625e-11	-3.40625e-11
-7.03125e-11	-6.53125e-11	-6.65625e-11	-5.34375e-11	-5.28125e-11	-6.1875e-11	-5.375e-11	-5.78125e-11	-5.9375e-11	-5.40625e-11	-6.9375e-11	-5.8125e-11	-5.5625e-11		-4.15625e-11	-4.40625e-11	-4.03125e-11	-3.9375e-11	-4.03125e-11	-4.34375e-11	-4.09375e-11	-4.53125e-11	-3.90625e-11	-3.21875e-11	-3.53125e-11	-4.03125e-11	-3.28125e-11
-8.09375e-11	-5.875e-11	-7.53125e-11	-5.78125e-11	-5.84375e-11	-5.875e-11	-5.1875e-11	-7e-11	-6.25e-11	-6.1875e-11	-6.28125e-11	-6.1875e-11	-5.28125e-11		-4.71875e-11	-4.28125e-11	-4.46875e-11	-3.6875e-11	-3.5625e-11	-3.71875e-11	-3.78125e-11	-4.53125e-11	-3.8125e-11	-3.875e-11	-3.6875e-11	-4.53125e-11	-3.6875e-11
-7.46875e-11	-6.34375e-11	-6.34375e-11	-5.40625e-11	-5e-11	-6.46875e-11	-5.625e-11	-6.40625e-11	-6.09375e-11	-6.21875e-11	-6.28125e-11	-5.59375e-11	-5.59375e-11		-4.6875e-11	-4.125e-11	-4.65625e-11	-4.40625e-11	-4.125e-11	-3.8125e-11	-4.125e-11	-4.53125e-11	-3.40625e-11	-4.09375e-11	-3.5625e-11	-3.75e-11	-3.84375e-11
-8.03125e-11	-7.40625e-11	-6.65625e-11	-5.9375e-11	-5.1875e-11	-5.96875e-11	-5.6875e-11	-6.03125e-11	-6.78125e-11	-5.9375e-11	-6.34375e-11	-5.90625e-11	-5.9375e-11		-4.125e-11	-3.96875e-11	-4.5e-11	-4.125e-11	-3.78125e-11	-3.59375e-11	-4.4375e-11	-4.46875e-11	-3.90625e-11	-3.84375e-11	-3.5625e-11	-3.46875e-11	-3.375e-11
-7.65625e-11	-6.90625e-11	-6.5625e-11	-5.78125e-11	-5.90625e-11	-6.4375e-11	-6.5e-11	-6.1875e-11	-6.40625e-11	-6.25e-11	-6.34375e-11	-6.59375e-11	-5.78125e-11		-4.28125e-11	-4.40625e-11	-4.40625e-11	-4.8125e-11	-3.90625e-11	-4.03125e-11	-4.03125e-11	-4.53125e-11	-4.40625e-11	-3.625e-11	-3.75e-11	-4e-11	-4.09375e-11
-7.5e-11	-6.3125e-11	-6.15625e-11	-5.3125e-11	-5.25e-11	-6.53125e-11	-5.96875e-11	-5.75e-11	-6.40625e-11	-5.65625e-11	-6.53125e-11	-6.5625e-11	-5.3125e-11		-4.40625e-11	-4.28125e-11	-3.84375e-11	-4.53125e-11	-4.15625e-11	-4.1875e-11	-4.09375e-11	-4.375e-11	-4.1875e-11	-4.15625e-11	-3.9375e-11	-3.4375e-11	-4.15625e-11
-7.34375e-11	-6.34375e-11	-6.875e-11	-5.71875e-11	-5.90625e-11	-6.375e-11	-6.125e-11	-5.34375e-11	-7e-11	-6.09375e-11	-6.5625e-11	-6.09375e-11	-6.3125e-11		-4.3125e-11	-4.03125e-11	-3.6875e-11	-4.15625e-11	-4.78125e-11	-4.03125e-11	-4.0625e-11	-4.46875e-11	-4.46875e-11	-4.21875e-11	-3.59375e-11	-3.78125e-11	-4.03125e-11
-8.03125e-11	-5.84375e-11	-6.65625e-11	-6.3125e-11	-5.09375e-11	-6.15625e-11	-5.5e-11	-6.15625e-11	-6.375e-11	-6.03125e-11	-6.125e-11	-5.78125e-11	-5.625e-11		-4.3125e-11	-4.1875e-11	-4.46875e-11	-3.875e-11	-4.25e-11	-3.90625e-11	-3.5e-11	-4.28125e-11	-4.3125e-11	-4.5625e-11	-3.4375e-11	-4.09375e-11	-3.59375e-11
-7.65625e-11	-6.875e-11	-6.9375e-11	-6.21875e-11	-5.5e-11	-5.65625e-11	-5.65625e-11	-5.625e-11	-5.96875e-11	-6.28125e-11	-6.65625e-11	-5.78125e-11	-5.625e-11		-4.5625e-11	-4.53125e-11	-4.1875e-11	-4.15625e-11	-4.34375e-11	-4.46875e-11	-3.34375e-11	-4.5e-11	-4.25e-11	-4.375e-11	-3.65625e-11	-4.03125e-11	-3.4375e-11
-7.875e-11	-6.4375e-11	-6.53125e-11	-6.03125e-11	-5.71875e-11	-6.03125e-11	-5.90625e-11	-6.03125e-11	-6.15625e-11	-5.46875e-11	-6.03125e-11	-5.875e-11	-5.5e-11		-3.9375e-11	-4.65625e-11	-4.125e-11	-4.0625e-11	-4.5e-11	-4.125e-11	-4.0625e-11	-4.28125e-11	-3.90625e-11	-4.0625e-11	-4.15625e-11	-3.90625e-11	-3.90625e-11
-8.3125e-11	-6.5e-11	-7.09375e-11	-6.09375e-11	-5.1875e-11	-5.875e-11	-6.03125e-11	-6.09375e-11	-6.875e-11	-6.34375e-11	-5.53125e-11	-6.28125e-11	-5.625e-11		-4.03125e-11	-4.0625e-11	-3.5e-11	-4.40625e-11	-4.15625e-11	-4.1875e-11	-4.21875e-11	-3.9375e-11	-4.09375e-11	-3.40625e-11	-4.375e-11	-4.03125e-11	-3.9375e-11
-8.03125e-11	-6.71875e-11	-6.28125e-11	-5.78125e-11	-6e-11	-7.03125e-11	-5.125e-11	-6.40625e-11	-5.84375e-11	-5.65625e-11	-7.0625e-11	-6.0625e-11	-5.71875e-11		-4.4375e-11	-4.4375e-11	-3.65625e-11	-4.03125e-11	-3.96875e-11	-4.28125e-11	-4.3125e-11	-4.03125e-11	-4.3125e-11	-3.21875e-11	-4.25e-11	-3.6875e-11	-4.34375e-11
-7.375e-11	-6.9375e-11	-6.96875e-11	-5.125e-11	-6e-11	-6.28125e-11	-5.625e-11	-5.75e-11	-6.78125e-11	-6.15625e-11	-6.3125e-11	-6.375e-11	-5.75e-11		-4.9375e-11	-4.28125e-11	-4.09375e-11	-4.34375e-11	-4e-11	-4.1875e-11	-4.53125e-11	-4.34375e-11	-4.25e-11	-3.46875e-11	-3.375e-11	-3.40625e-11	-3.96875e-11
-8.5e-11	-7.375e-11	-6.875e-11	-5.71875e-11	-5.5625e-11	-6.21875e-11	-6.15625e-11	-5.625e-11	-6.5e-11	-6e-11	-6.15625e-11	-6.34375e-11	-5.21875e-11		-4.5e-11	-4.0625e-11	-4.28125e-11	-4.03125e-11	-4.3125e-11	-3.96875e-11	-4.53125e-11	-4.5e-11	-4.125e-11	-3.71875e-11	-3.625e-11	-3.09375e-11	-3.65625e-11
-7.1875e-11	-5.9375e-11	-7.40625e-11	-5.9375e-11	-5.65625e-11	-6.59375e-11	-5.46875e-11	-5.78125e-11	-6.34375e-11	-5.875e-11	-6e-11	-6.15625e-11	-5.78125e-11		-4.65625e-11	-4.03125e-11	-4.34375e-11	-4.34375e-11	-4.8125e-11	-4.1875e-11	-3.71875e-11	-4.28125e-11	-4.03125e-11	-4.125e-11	-3.84375e-11	-3.78125e-11	-3.53125e-11
-7.53125e-11	-6.90625e-11	-6.6875e-11	-5.53125e-11	-5.5e-11	-6.40625e-11	-4.78125e-11	-6.03125e-11	-5.625e-11	-5.09375e-11	-6.375e-11	-5.96875e-11	-4.9375e-11		-4.46875e-11	-4.375e-11	-4.1875e-11	-3.9375e-11	-4.84375e-11	-4.3125e-11	-3.78125e-11	-4.25e-11	-4.28125e-11	-4.09375e-11	-4e-11	-3.84375e-11	-3.9375e-11
-8.03125e-11	-6.28125e-11	-7.3125e-11	-5.71875e-11	-5.90625e-11	-6.34375e-11	-5.90625e-11	-6.40625e-11	-6.21875e-11	-5.84375e-11	-6.9375e-11	-5.15625e-11	-5.71875e-11		-4.53125e-11	-4.375e-11	-3.90625e-11	-3.9375e-11	-4.65625e-11	-3.9375e-11	-4.5e-11	-4.15625e-11	-3.96875e-11	-4.15625e-11	-4.34375e-11	-3.875e-11	-3.6875e-11
-8.15625e-11	-6.1875e-11	-6.5e-11	-5.4375e-11	-6.125e-11	-7.03125e-11	-6.03125e-11	-5.28125e-11	-6.9375e-11	-5.78125e-11	-6.15625e-11	-5.96875e-11	-5.71875e-11		-4.09375e-11	-4.875e-11	-4.3125e-11	-4.125e-11	-4.3125e-11	-3.4375e-11	-4.3125e-11	-4.375e-11	-4.4375e-11	-4.03125e-11	-4.03125e-11	-3.3125e-11	-3.6875e-11
-7.84375e-11	-6.03125e-11	-7.3125e-11	-5.78125e-11	-5.96875e-11	-5.875e-11	-6.09375e-11	-5.28125e-11	-6.03125e-11	-5.53125e-11	-6.03125e-11	-6.34375e-11	-5.21875e-11		-4.3125e-11	-4.21875e-11	-4.21875e-11	-4.21875e-11	-4.0625e-11	-3.46875e-11	-3.78125e-11	-4.34375e-11	-4.34375e-11	-3.90625e-11	-4.03125e-11	-3.9375e-11	-4e-11
-7.59375e-11	-6.75e-11	-6.5625e-11	-5.53125e-11	-5.90625e-11	-6.0625e-11	-5.59375e-11	-5.84375e-11	-6.28125e-11	-6.21875e-11	-6.65625e-11	-6.15625e-11	-5.53125e-11		-4.34375e-11	-4.375e-11	-3.78125e-11	-4.375e-11	-3.8125e-11	-3.6875e-11	-4.03125e-11	-4.53125e-11	-4.03125e-11	-3.90625e-11	-4.28125e-11	-3.75e-11	-4.1875e-11
-7.3125e-11	-6.1875e-11	-6.4375e-11	-5.15625e-11	-5.65625e-11	-6.46875e-11	-5.40625e-11	-5.34375e-11	-5.84375e-11	-5.6875e-11	-6.0625e-11	-6e-11	-6.28125e-11		-4.59375e-11	-3.71875e-11	-3.65625e-11	-4e-11	-4.1875e-11	-4.03125e-11	-3.9375e-11	-4.875e-11	-4.03125e-11	-4.5e-11	-4.375e-11	-3.375e-11	-3.6875e-11
-7.90625e-11	-6.3125e-11	-6.90625e-11	-6.46875e-11	-6.78125e-11	-6.25e-11	-5.53125e-11	-4.84375e-11	-6e-11	-5.9375e-11	-5.875e-11	-5.78125e-11	-5.5e-11		-4.46875e-11	-3.84375e-11	-3.84375e-11	-4.125e-11	-4.625e-11	-4.25e-11	-4.375e-11	-4.90625e-11	-4.0625e-11	-4.21875e-11	-3.65625e-11	-3.78125e-11	-3.5e-11
-7.46875e-11	-6.28125e-11	-6.5e-11	-5.6875e-11	-5.34375e-11	-6.375e-11	-5.78125e-11	-5.875e-11	-5.84375e-11	-6.09375e-11	-5.53125e-11	-6.09375e-11	-6.03125e-11		-4.3125e-11	-3.9375e-11	-4.84375e-11	-4.59375e-11	-4.40625e-11	-4.03125e-11	-4.59375e-11	-4.09375e-11	-4.25e-11	-3.5e-11	-3.6875e-11	-3.3125e-11	-3.40625e-11
-7.46875e-11	-6.6875e-11	-7.0625e-11	-5.84375e-11	-6.1875e-11	-6.28125e-11	-6.0625e-11	-5.46875e-11	-5.8125e-11	-5.90625e-11	-5.78125e-11	-5.21875e-11	-5.4375e-11		-4.1875e-11	-4.28125e-11	-5.03125e-11	-4.46875e-11	-4.375e-11	-4.03125e-11	-4.15625e-11	-3.78125e-11	-3.6875e-11	-3.875e-11	-3.5625e-11	-3.40625e-11	-3.40625e-11
-7.5e-11	-6.375e-11	-6.28125e-11	-5.96875e-11	-5.53125e-11	-6.34375e-11	-5.5e-11	-5.53125e-11	-6.625e-11	-5.5625e-11	-6.21875e-11	-5.625e-11	-5.3125e-11		-4.28125e-11	-4.375e-11	-4.375e-11	-4.46875e-11	-4.03125e-11	-4.65625e-11	-3.78125e-11	-4.0625e-11	-4.21875e-11	-4.03125e-11	-3.46875e-11	-3.75e-11	-4.0625e-11
-7.5e-11	-6.21875e-11	-6.78125e-11	-5.15625e-11	-6e-11	-6.65625e-11	-5.71875e-11	-6.03125e-11	-6.34375e-11	-5.59375e-11	-5.875e-11	-6.15625e-11	-5.40625e-11		-4.5e-11	-4.0625e-11	-4.09375e-11	-4.34375e-11	-4.53125e-11	-4.84375e-11	-3.5e-11	-4.03125e-11	-4.15625e-11	-3.75e-11	-3.90625e-11	-4.4375e-11	-3.78125e-11
-7.6875e-11	-6.59375e-11	-7.3125e-11	-5.90625e-11	-6.03125e-11	-6.40625e-11	-5.34375e-11	-5.90625e-11	-6.15625e-11	-6.28125e-11	-6.125e-11	-5.8125e-11	-6.46875e-11		-4.3125e-11	-3.75e-11	-4.5625e-11	-4.34375e-11	-4.5625e-11	-4.28125e-11	-3.53125e-11	-4.15625e-11	-4.3125e-11	-4.03125e-11	-3.40625e-11	-4.46875e-11	-3.875e-11
-8.03125e-11	-6.78125e-11	-6.5e-11	-5.96875e-11	-5.8125e-11	-7.28125e-11	-5.8125e-11	-5.5e-11	-6.15625e-11	-6.3125e-11	-6.09375e-11	-6.0625e-11	-5.34375e-11		-4.1875e-11	-4.28125e-11	-4.4375e-11	-3.625e-11	-4.09375e-11	-4.40625e-11	-3.96875e-11	-4.0625e-11	-4.65625e-11	-4.15625e-11	-3.75e-11	-4.34375e-11	-4.28125e-11
-8.03125e-11	-7e-11	-6.46875e-11	-5.90625e-11	-6.03125e-11	-5.96875e-11	-6.03125e-11	-6.46875e-11	-6.53125e-11	-6.0625e-11	-5.53125e-11	-6.28125e-11	-6.0625e-11		-4.03125e-11	-4.28125e-11	-4.65625e-11	-3.59375e-11	-4.1875e-11	-4.03125e-11	-4.03125e-11	-4.3125e-11	-4.28125e-11	-4.0625e-11	-3.78125e-11	-4.03125e-11	-3.78125e-11
-7.5e-11	-6e-11	-6.5e-11	-5.25e-11	-6.28125e-11	-7.28125e-11	-5.84375e-11	-5.90625e-11	-5.6875e-11	-6.1875e-11	-6.78125e-11	-6.5625e-11	-4.21875e-11		-4.46875e-11	-4.65625e-11	-4.34375e-11	-4.125e-11	-4.03125e-11	-3.6875e-11	-4.25e-11	-4.1875e-11	-4.5e-11	-3.90625e-11	-3.84375e-11	-3.78125e-11	-3.15625e-11
-7.84375e-11	-6.46875e-11	-6.46875e-11	-5.78125e-11	-5.71875e-11	-6.5625e-11	-5.28125e-11	-6.125e-11	-5.90625e-11	-5.5e-11	-6.53125e-11	-6.96875e-11	-5.71875e-11		-3.9375e-11	-4.40625e-11	-3.9375e-11	-4.1875e-11	-4.09375e-11	-4.03125e-11	-4.21875e-11	-4.15625e-11	-4.34375e-11	-4.15625e-11	-3.75e-11	-3.46875e-11	-3.53125e-11
-8.125e-11	-6.53125e-11	-6.78125e-11	-6.21875e-11	-5.1875e-11	-6.5e-11	-5.71875e-11	-5.96875e-11	-6.125e-11	-5.40625e-11	-6.5e-11	-6.1875e-11	-5.96875e-11		-4.125e-11	-4.03125e-11	-4.25e-11	-3.84375e-11	-4.09375e-11	-4.15625e-11	-3.71875e-11	-4.90625e-11	-3.90625e-11	-3.78125e-11	-3.875e-11	-3.90625e-11	-4.15625e-11
-7.71875e-11	-6.28125e-11	-7.0625e-11	-5.8125e-11	-5.875e-11	-6.4375e-11	-6.5e-11	-5.84375e-11	-6.8125e-11	-5.65625e-11	-5.90625e-11	-5.96875e-11	-5.65625e-11		-4.375e-11	-4.5e-11	-4.53125e-11	-4.15625e-11	-4.4375e-11	-3.75e-11	-4.15625e-11	-4.78125e-11	-3.78125e-11	-3.78125e-11	-3.90625e-11	-3.90625e-11	-3.625e-11
-8.03125e-11	-6.15625e-11	-7.0625e-11	-6.15625e-11	-5.4375e-11	-6.6875e-11	-5.46875e-11	-5.46875e-11	-6.125e-11	-5.71875e-11	-6.125e-11	-6.15625e-11	-5.6875e-11		-4.65625e-11	-4.15625e-11	-4.375e-11	-4.34375e-11	-4.6875e-11	-4.1875e-11	-4.0625e-11	-4.0625e-11	-4.1875e-11	-3.71875e-11	-4.15625e-11	-3.5e-11	-3.9375e-11
-7.59375e-11	-5.6875e-11	-6.875e-11	-5.5625e-11	-6.03125e-11	-6.15625e-11	-5.03125e-11	-6.625e-11	-7.03125e-11	-5.03125e-11	-5.5625e-11	-5.53125e-11	-5.4375e-11		-4.53125e-11	-4.5e-11	-4.46875e-11	-4.15625e-11	-4.25e-11	-4.5e-11	-4.03125e-11	-3.6875e-11	-4.40625e-11	-4.125e-11	-4.03125e-11	-3.5625e-11	-3.90625e-11
-7.8125e-11	-6.5e-11	-6.28125e-11	-5.84375e-11	-6.15625e-11	-7.4375e-11	-5.4375e-11	-5.78125e-11	-7.09375e-11	-5.78125e-11	-6.15625e-11	-6.03125e-11	-5.21875e-11		-4.375e-11	-4.34375e-11	-3.71875e-11	-4.25e-11	-4.09375e-11	-3.90625e-11	-4.4375e-11	-3.90625e-11	-3.9375e-11	-4.28125e-11	-4.03125e-11	-3.5e-11	-3.65625e-11
-7.71875e-11	-7.34375e-11	-6.84375e-11	-5.40625e-11	-5.875e-11	-6.96875e-11	-5.53125e-11	-5.5625e-11	-6.34375e-11	-5.375e-11	-6.78125e-11	-5.78125e-11	-5.8125e-11		-4.53125e-11	-4.34375e-11	-3.78125e-11	-4.03125e-11	-4.34375e-11	-3.75e-11	-4.1875e-11	-4.5e-11	-3.90625e-11	-4.46875e-11	-4.03125e-11	-3.84375e-11	-3.53125e-11
-7.875e-11	-5.53125e-11	-6.4375e-11	-6.4375e-11	-5.5e-11	-7.03125e-11	-5.5e-11	-6.21875e-11	-6.90625e-11	-5.1875e-11	-6e-11	-6.34375e-11	-5.8125e-11		-4.3125e-11	-4.1875e-11	-4.53125e-11	-3.53125e-11	-4.28125e-11	-3.9375e-11	-4.375e-11	-4.46875e-11	-4.0625e-11	-4.65625e-11	-3.1875e-11	-3.3125e-11	-3.9375e-11
-6.90625e-11	-5.96875e-11	-7.15625e-11	-6.40625e-11	-6.0625e-11	-6.78125e-11	-5.53125e-11	-6.03125e-11	-6.53125e-11	-5.4375e-11	-6.28125e-11	-6.53125e-11	-5.75e-11		-3.84375e-11	-3.78125e-11	-4.46875e-11	-4.0625e-11	-4.15625e-11	-4.3125e-11	-4.34375e-11	-4.6875e-11	-4.25e-11	-4.53125e-11	-4.0625e-11	-3.5625e-11	-3.65625e-11
-7.8125e-11	-6.78125e-11	-6.21875e-11	-6.53125e-11	-5.5625e-11	-6.4375e-11	-5.125e-11	-5.59375e-11	-6.125e-11	-5.6875e-11	-6.46875e-11	-5.90625e-11	-6.84375e-11		-4.34375e-11	-4.8125e-11	-4.21875e-11	-4.15625e-11	-3.84375e-11	-4.03125e-11	-3.96875e-11	-4.5e-11	-3.90625e-11	-4.03125e-11	-3.84375e-11	-3.5e-11	-3.46875e-11
-7e-11	-6.40625e-11	-7e-11	-5.78125e-11	-6.125e-11	-6.59375e-11	-5.25e-11	-6.03125e-11	-5.71875e-11	-5.65625e-11	-6.15625e-11	-6.34375e-11	-5.59375e-11		-4.53125e-11	-4.1875e-11	-4.34375e-11	-4.09375e-11	-3.875e-11	-4.65625e-11	-3.84375e-11	-4.34375e-11	-4.3125e-11	-4.0625e-11	-3.78125e-11	-3.625e-11	-3.6875e-11
-7.625e-11	-6.78125e-11	-6.375e-11	-6.5625e-11	-6e-11	-6.3125e-11	-5.28125e-11	-6e-11	-6.71875e-11	-4.9375e-11	-6.375e-11	-6.25e-11	-5.53125e-11		-4.4375e-11	-4.40625e-11	-4.3125e-11	-4.59375e-11	-4.28125e-11	-4.28125e-11	-4.28125e-11	-4.46875e-11	-4.09375e-11	-4.03125e-11	-3.40625e-11	-3.71875e-11	-3.6875e-11
-7.75e-11	-6.5e-11	-6.90625e-11	-5.84375e-11	-5.375e-11	-6.5625e-11	-5.59375e-11	-6.03125e-11	-6.28125e-11	-5.375e-11	-5.75e-11	-7.0625e-11	-5.875e-11		-4.28125e-11	-4.65625e-11	-3.8125e-11	-4.21875e-11	-3.78125e-11	-3.8125e-11	-3.90625e-11	-3.90625e-11	-3.5625e-11	-3.59375e-11	-3.59375e-11	-3.65625e-11	-3.875e-11
-8.15625e-11	-6.40625e-11	-6.96875e-11	-6.03125e-11	-5.65625e-11	-6.53125e-11	-5.875e-11	-6.53125e-11	-6.6875e-11	-5.5625e-11	-6.0625e-11	-6.8125e-11	-4.34375e-11		-4.46875e-11	-4.21875e-11	-3.9375e-11	-3.9375e-11	-3.6875e-11	-4.03125e-11	-4.65625e-11	-4.03125e-11	-3.84375e-11	-3.59375e-11	-3.90625e-11	-3.875e-11	-4.34375e-11
-7.65625e-11	-6.0625e-11	-7.03125e-11	-6.1875e-11	-5.46875e-11	-6.21875e-11	-5.875e-11	-5.25e-11	-5.96875e-11	-5.90625e-11	-5.625e-11	-7e-11	-6.375e-11		-4.28125e-11	-4.03125e-11	-4.46875e-11	-4.4375e-11	-4.25e-11	-4.21875e-11	-4.28125e-11	-4.09375e-11	-4.21875e-11	-3.25e-11	-4.46875e-11	-3.875e-11	-3.71875e-11
-7.96875e-11	-6.15625e-11	-6.4375e-11	-5.5625e-11	-5.34375e-11	-6.28125e-11	-5.6875e-11	-5.6875e-11	-6.53125e-11	-6.1875e-11	-6.40625e-11	-6.46875e-11	-5.40625e-11		-4.3125e-11	-4.4375e-11	-4.53125e-11	-4.09375e-11	-4.15625e-11	-4.0625e-11	-4.1875e-11	-4.1875e-11	-4.09375e-11	-3.09375e-11	-4.03125e-11	-3.53125e-11	-3.1875e-11
-7.59375e-11	-6.65625e-11	-6.3125e-11	-6.09375e-11	-6.09375e-11	-6.375e-11	-6.28125e-11	-5.84375e-11	-6.125e-11	-5.5625e-11	-6.3125e-11	-6.6875e-11	-6.0625e-11		-4.15625e-11	-4.40625e-11	-4.5e-11	-4.34375e-11	-3.90625e-11	-4.4375e-11	-4.59375e-11	-4.03125e-11	-4.40625e-11	-4.09375e-11	-4.03125e-11	-3.625e-11	-3.125e-11
-8.03125e-11	-6.65625e-11	-6.28125e-11	-6.34375e-11	-5.875e-11	-6.6875e-11	-6.3125e-11	-6.03125e-11	-6.5e-11	-6.15625e-11	-5.53125e-11	-6.8125e-11	-5.25e-11		-4.375e-11	-4.5e-11	-4.53125e-11	-4.59375e-11	-4.03125e-11	-4.75e-11	-4.09375e-11	-4.03125e-11	-4.53125e-11	-3.71875e-11	-4.25e-11	-3.625e-11	-3.71875e-11
-7.65625e-11	-6.03125e-11	-7e-11	-5.53125e-11	-5.53125e-11	-6.71875e-11	-5.9375e-11	-5.875e-11	-5.40625e-11	-5.96875e-11	-6.46875e-11	-6.1875e-11	-5.9375e-11		-4.40625e-11	-4.03125e-11	-4.375e-11	-4.28125e-11	-4.4375e-11	-3.96875e-11	-3.8125e-11	-4.34375e-11	-4.4375e-11	-3.84375e-11	-4.03125e-11	-3.90625e-11	-3.84375e-11
-7.15625e-11	-5.71875e-11	-6.25e-11	-5.96875e-11	-5.0625e-11	-6.65625e-11	-5.4375e-11	-6.28125e-11	-6.53125e-11	-6.3125e-11	-5.40625e-11	-6.34375e-11	-5.53125e-11		-4.5625e-11	-4.0625e-11	-4.53125e-11	-4.15625e-11	-4.03125e-11	-3.4375e-11	-4.3125e-11	-4.71875e-11	-4.28125e-11	-3.75e-11	-3.875e-11	-4.03125e-11	-4.09375e-11
-8.21875e-11	-6.5625e-11	-7.125e-11	-5.78125e-11	-5.84375e-11	-6.78125e-11	-6e-11	-6.8125e-11	-6.375e-11	-6.125e-11	-5.59375e-11	-6.25e-11	-5.59375e-11		-4.46875e-11	-4.5625e-11	-4.46875e-11	-4.3125e-11	-3.78125e-11	-3.5e-11	-3.875e-11	-4.59375e-11	-4.03125e-11	-3.59375e-11	-4.03125e-11	-4.15625e-11	-3.84375e-11
-7.5e-11	-6.65625e-11	-6.5e-11	-6.15625e-11	-6.21875e-11	-6.34375e-11	-5.53125e-11	-6.375e-11	-6.25e-11	-5.71875e-11	-5.90625e-11	-5.78125e-11	-5.5e-11		-4.34375e-11	-4.21875e-11	-3.9375e-11	-3.9375e-11	-3.65625e-11	-4.34375e-11	-3.46875e-11	-4.625e-11	-3.875e-11	-3.78125e-11	-3.84375e-11	-3.90625e-11	-3.65625e-11
-8.21875e-11	-5.90625e-11	-6.46875e-11	-6e-11	-5.71875e-11	-6.28125e-11	-5.3125e-11	-6.125e-11	-5.96875e-11	-6.5625e-11	-5.875e-11	-5.9375e-11	-5.875e-11		-4.09375e-11	-4.03125e-11	-4.0625e-11	-4.21875e-11	-4.40625e-11	-4.03125e-11	-3.15625e-11	-4.3125e-11	-4.03125e-11	-3.96875e-11	-4.125e-11	-3.46875e-11	-4.03125e-11
-8.4375e-11	-6.4375e-11	-6.71875e-11	-6.09375e-11	-6.03125e-11	-6.53125e-11	-5.65625e-11	-5.71875e-11	-6.9375e-11	-6.03125e-11	-5.65625e-11	-6.71875e-11	-5.59375e-11		-3.8125e-11	-3.9375e-11	-4.0625e-11	-4.46875e-11	-4.53125e-11	-4.03125e-11	-3.75e-11	-4.21875e-11	-4.03125e-11	-4.1875e-11	-3.9375e-11	-3.5e-11	-4.03125e-11
-7.5e-11	-6.28125e-11	-6.4375e-11	-6.03125e-11	-5.15625e-11	-5.6875e-11	-5.5625e-11	-6.59375e-11	-6.40625e-11	-5.78125e-11	-6.21875e-11	-5.90625e-11	-5.6875e-11		-4.3125e-11	-4.40625e-11	-3.625e-11	-4.46875e-11	-4.1875e-11	-3.78125e-11	-4.28125e-11	-4.375e-11	-3.8125e-11	-4.28125e-11	-3.625e-11	-3.65625e-11	-3.5e-11
-7.03125e-11	-6.3125e-11	-6.03125e-11	-5.9375e-11	-5.4375e-11	-6.71875e-11	-5.625e-11	-6.8125e-11	-7.125e-11	-4.84375e-11	-5.15625e-11	-6.5625e-11	-5.65625e-11		-4.40625e-11	-3.875e-11	-4.28125e-11	-3.9375e-11	-4.3125e-11	-3.9375e-11	-4.03125e-11	-4.46875e-11	-4.1875e-11	-3.84375e-11	-3.4375e-11	-3.78125e-11	-3.59375e-11
-7.375e-11	-6.09375e-11	-6.1875e-11	-5.8125e-11	-5.78125e-11	-6.25e-11	-5.90625e-11	-5.65625e-11	-6.78125e-11	-5.6875e-11	-6.40625e-11	-6.15625e-11	-6.09375e-11		-4.625e-11	-3.5e-11	-4.65625e-11	-4.25e-11	-4.3125e-11	-4.03125e-11	-4.28125e-11	-4.40625e-11	-4.59375e-11	-3.4375e-11	-3.21875e-11	-4.03125e-11	-3.4375e-11
-8.4375e-11	-6.03125e-11	-6.78125e-11	-6.09375e-11	-5.8125e-11	-6.4375e-11	-5.40625e-11	-5.71875e-11	-6.03125e-11	-5.78125e-11	-5.78125e-11	-6.21875e-11	-5.9375e-11		-4.6875e-11	-3.9375e-11	-4.59375e-11	-4.59375e-11	-4.5e-11	-4.25e-11	-4.15625e-11	-3.875e-11	-4.53125e-11	-3.53125e-11	-3.15625e-11	-3.4375e-11	-4.21875e-11
-7.5e-11	-6.71875e-11	-6.34375e-11	-6.4375e-11	-5.53125e-11	-6.15625e-11	-5.9375e-11	-5.9375e-11	-6.125e-11	-6.75e-11	-5.6875e-11	-7.03125e-11	-6.25e-11		-4.4375e-11	-4.46875e-11	-4.375e-11	-4.46875e-11	-4.25e-11	-4.15625e-11	-4.34375e-11	-4.0625e-11	-4.28125e-11	-3.9375e-11	-3.3125e-11	-3.21875e-11	-4.3125e-11
-7.46875e-11	-6.03125e-11	-7.5e-11	-6.03125e-11	-5.5e-11	-6.5e-11	-5.25e-11	-5.28125e-11	-5.875e-11	-5.84375e-11	-5.96875e-11	-5.78125e-11	-5.9375e-11		-4.59375e-11	-4.34375e-11	-4.1875e-11	-4.28125e-11	-3.90625e-11	-4.03125e-11	-4.21875e-11	-4.65625e-11	-4.15625e-11	-3.90625e-11	-3.84375e-11	-3.6875e-11	-4.0625e-11
-8.15625e-11	-6.09375e-11	-6.59375e-11	-6.03125e-11	-5.46875e-11	-6.1875e-11	-5.71875e-11	-6.1875e-11	-6.28125e-11	-6e-11	-6.1875e-11	-5.8125e-11	-5.625e-11		-3.8125e-11	-4.65625e-11	-3.90625e-11	-4.375e-11	-4.21875e-11	-4.15625e-11	-4.03125e-11	-4.28125e-11	-4.125e-11	-3.96875e-11	-4.3125e-11	-4.40625e-11	-3.875e-11
-8.40625e-11	-6.8125e-11	-5.84375e-11	-5.9375e-11	-5.8125e-11	-6.21875e-11	-5.84375e-11	-5.6875e-11	-6.59375e-11	-5.65625e-11	-6.46875e-11	-6.46875e-11	-5.65625e-11		-4.03125e-11	-4.46875e-11	-3.9375e-11	-4.28125e-11	-3.9375e-11	-4.28125e-11	-3.78125e-11	-4.03125e-11	-3.3125e-11	-4.1875e-11	-3.875e-11	-4.03125e-11	-4.03125e-11
-8.25e-11	-6.8125e-11	-6.9375e-11	-6.375e-11	-5.09375e-11	-6.53125e-11	-6.15625e-11	-5.375e-11	-6.5625e-11	-6.0625e-11	-5.375e-11	-6.46875e-11	-5.5e-11		-4.28125e-11	-3.78125e-11	-4.15625e-11	-4.53125e-11	-4.15625e-11	-3.875e-11	-4.03125e-11	-4.03125e-11	-3.53125e-11	-4.21875e-11	-4.09375e-11	-3.625e-11	-3.53125e-11
-7.53125e-11	-6.34375e-11	-6.59375e-11	-5.5625e-11	-5.1875e-11	-6.75e-11	-5.21875e-11	-6.5625e-11	-5.90625e-11	-5.65625e-11	-5.65625e-11	-5.90625e-11	-5.5625e-11		-4.34375e-11	-4.15625e-11	-4.4375e-11	-4.375e-11	-4.4375e-11	-4.3125e-11	-3.84375e-11	-4.375e-11	-4.5e-11	-4.125e-11	-3.78125e-11	-3.71875e-11	-3.5625e-11
-8.1875e-11	-7.0625e-11	-6.59375e-11	-5.65625e-11	-5.59375e-11	-5.875e-11	-5.1875e-11	-5.8125e-11	-6.46875e-11	-5.65625e-11	-5.5e-11	-6.5e-11	-6.03125e-11		-4.1875e-11	-4.4375e-11	-4.625e-11	-3.875e-11	-4.3125e-11	-4.125e-11	-3.9375e-11	-4.90625e-11	-4.3125e-11	-3.53125e-11	-4.09375e-11	-3.53125e-11	-4.1875e-11
-7.875e-11	-6.53125e-11	-6.5625e-11	-6.25e-11	-4.9375e-11	-6.34375e-11	-5.59375e-11	-6.65625e-11	-6.125e-11	-6e-11	-6.78125e-11	-6.15625e-11	-6.21875e-11		-4.34375e-11	-4.5e-11	-4.15625e-11	-3.96875e-11	-3.96875e-11	-3.84375e-11	-3.65625e-11	-4.34375e-11	-3.71875e-11	-3.75e-11	-4.5e-11	-4.0625e-11	-4.28125e-11
-7.78125e-11	-6.8125e-11	-7e-11	-6.125e-11	-5.53125e-11	-6.40625e-11	-5.65625e-11	-6.3125e-11	-6.46875e-11	-5.96875e-11	-5.71875e-11	-6.4375e-11	-5.03125e-11		-4.03125e-11	-4.21875e-11	-4.34375e-11	-4.03125e-11	-4.09375e-11	-4.09375e-11	-3.84375e-11	-3.90625e-11	-4.1875e-11	-4.03125e-11	-4.03125e-11	-3.8125e-11	-4.0625e-11
-7.46875e-11	-6.5625e-11	-6.90625e-11	-5.9375e-11	-5.65625e-11	-6.59375e-11	-6.46875e-11	-6.34375e-11	-6.53125e-11	-5.8125e-11	-6.53125e-11	-5.96875e-11	-6e-11		-4.34375e-11	-4.28125e-11	-4.09375e-11	-4.09375e-11	-4.96875e-11	-4.65625e-11	-4.15625e-11	-4.0625e-11	-3.875e-11	-3.84375e-11	-4.03125e-11	-3.5e-11	-4.03125e-11
-7.625e-11	-6.15625e-11	-6.5625e-11	-5.9375e-11	-5.6875e-11	-6.75e-11	-5.125e-11	-6.1875e-11	-6.28125e-11	-5.8125e-11	-6.21875e-11	-6.59375e-11	-6.125e-11		-4.6875e-11	-4.75e-11	-4.53125e-11	-4.4375e-11	-4.78125e-11	-4.28125e-11	-4.46875e-11	-3.75e-11	-3.375e-11	-3.5e-11	-3.65625e-11	-4.03125e-11	-3.625e-11
-8.03125e-11	-6.78125e-11	-7.40625e-11	-5.8125e-11	-5.40625e-11	-6.34375e-11	-5.5625e-11	-6e-11	-6.34375e-11	-6.21875e-11	-6.09375e-11	-5.96875e-11	-6.15625e-11		-4.28125e-11	-4.5e-11	-4.40625e-11	-4.34375e-11	-3.8125e-11	-4.34375e-11	-4.375e-11	-4.25e-11	-3.90625e-11	-3.65625e-11	-3.5e-11	-3.6875e-11	-4.09375e-11
-7.21875e-11	-5.96875e-11	-6.46875e-11	-5.96875e-11	-5.40625e-11	-6.46875e-11	-5.8125e-11	-6.28125e-11	-6.46875e-11	-6.65625e-11	-6.1875e-11	-6.40625e-11	-6.1875e-11		-4.5e-11	-4.03125e-11	-3.90625e-11	-4.0625e-11	-3.84375e-11	-4.34375e-11	-4.03125e-11	-3.875e-11	-4.3125e-11	-4.4375e-11	-3.65625e-11	-3.6875e-11	-4.15625e-11
-7.1875e-11	-6.4375e-11	-6.5e-11	-6.21875e-11	-5.4375e-11	-6.03125e-11	-6.0625e-11	-5.84375e-11	-5.84375e-11	-5.125e-11	-6.0625e-11	-6.5625e-11	-6.3125e-11		-4.15625e-11	-4.84375e-11	-3.78125e-11	-3.9375e-11	-3.53125e-11	-4.5e-11	-3.6875e-11	-3.8125e-11	-4.03125e-11	-4.03125e-11	-3.75e-11	-3.8125e-11	-3.90625e-11
-7.65625e-11	-5.875e-11	-6.21875e-11	-6.59375e-11	-6.15625e-11	-5.90625e-11	-5.40625e-11	-6.34375e-11	-6.53125e-11	-5.625e-11	-5.6875e-11	-7.03125e-11	-6.34375e-11		-3.84375e-11	-5.03125e-11	-4.0625e-11	-4.21875e-11	-4.03125e-11	-4.03125e-11	-3.78125e-11	-3.875e-11	-3.78125e-11	-4.1875e-11	-3.875e-11	-3.53125e-11	-3.96875e-11
-7.90625e-11	-6.6875e-11	-6.21875e-11	-6.0625e-11	-5.03125e-11	-6.25e-11	-5.59375e-11	-6.28125e-11	-7.0625e-11	-5.84375e-11	-5.34375e-11	-6.59375e-11	-5.875e-11		-4.125e-11	-4.34375e-11	-4.0625e-11	-4.25e-11	-4.1875e-11	-3.84375e-11	-3.75e-11	-3.90625e-11	-3.78125e-11	-4.375e-11	-4.28125e-11	-3.46875e-11	-3.625e-11
-8.03125e-11	-6.5625e-11	-5.90625e-11	-6.84375e-11	-5.9375e-11	-6.1875e-11	-5.71875e-11	-5.6875e-11	-6.3125e-11	-6.09375e-11	-6.40625e-11	-6.71875e-11	-5.28125e-11		-3.625e-11	-4.5e-11	-4.28125e-11	-4.6875e-11	-3.75e-11	-3.8125e-11	-4.28125e-11	-3.59375e-11	-3.8125e-11	-3.9375e-11	-4.53125e-11	-3.53125e-11	-4.28125e-11
-7.53125e-11	-6.65625e-11	-6.40625e-11	-6.15625e-11	-6.09375e-11	-5.6875e-11	-5.4375e-11	-6.15625e-11	-6.40625e-11	-5.5e-11	-5.75e-11	-5.90625e-11	-5.71875e-11		-3.8125e-11	-4.09375e-11	-4.03125e-11	-4.21875e-11	-3.71875e-11	-4.4375e-11	-4.0625e-11	-4.125e-11	-4.21875e-11	-4.03125e-11	-4.03125e-11	-3.65625e-11	-4.5e-11
-7.03125e-11	-7.34375e-11	-6.28125e-11	-6.21875e-11	-5.53125e-11	-6.59375e-11	-5.4375e-11	-6.84375e-11	-5.8125e-11	-5.875e-11	-6.4375e-11	-5.9375e-11	-5.625e-11		-4.4375e-11	-3.71875e-11	-4.53125e-11	-4.1875e-11	-4.3125e-11	-4.59375e-11	-4.28125e-11	-4.5625e-11	-4.65625e-11	-4.21875e-11	-3.71875e-11	-3.5625e-11	-3.71875e-11
-8.09375e-11	-5.9375e-11	-7.1875e-11	-5.53125e-11	-5.75e-11	-5.9375e-11	-4.96875e-11	-6.84375e-11	-6.0625e-11	-5.5e-11	-5.96875e-11	-6.53125e-11	-6.09375e-11		-4.71875e-11	-4.09375e-11	-3.84375e-11	-4.28125e-11	-4.3125e-11	-4.34375e-11	-4.59375e-11	-4.59375e-11	-4.53125e-11	-4.03125e-11	-3.4375e-11	-4.0625e-11	-3.6875e-11
-8.28125e-11	-6.40625e-11	-6.3125e-11	-6.84375e-11	-5.90625e-11	-6.0625e-11	-5.3125e-11	-6.40625e-11	-6.625e-11	-5.9375e-11	-5.6875e-11	-6.71875e-11	-5.40625e-11		-4.84375e-11	-4.53125e-11	-3.96875e-11	-4.21875e-11	-4.03125e-11	-3.875e-11	-4.28125e-11	-4.28125e-11	-4.15625e-11	-3.84375e-11	-3.5625e-11	-3.96875e-11	-4.09375e-11
-7.84375e-11	-6.28125e-11	-6.40625e-11	-5.875e-11	-5.46875e-11	-6.3125e-11	-5.5625e-11	-6.71875e-11	-6.53125e-11	-5.71875e-11	-6.34375e-11	-6.21875e-11	-5.25e-11		-4.46875e-11	-4.6875e-11	-4.34375e-11	-4.03125e-11	-4.375e-11	-4.03125e-11	-3.875e-11	-4.4375e-11	-4.09375e-11	-4.1875e-11	-3.71875e-11	-4.03125e-11	-4.125e-11
-7.4375e-11	-6.84375e-11	-6.59375e-11	-5.71875e-11	-5.84375e-11	-6.46875e-11	-5.03125e-11	-6.0625e-11	-6.78125e-11	-5.65625e-11	-6.28125e-11	-6.28125e-11	-4.90625e-11		-4.09375e-11	-3.90625e-11	-4.28125e-11	-4.625e-11	-4.5e-11	-3.71875e-11	-4.15625e-11	-3.90625e-11	-3.9375e-11	-3.8125e-11	-3.90625e-11	-3.78125e-11	-3.90625e-11
-7.15625e-11	-6.03125e-11	-7.375e-11	-6.03125e-11	-5.53125e-11	-6.53125e-11	-6.09375e-11	-6.53125e-11	-6.15625e-11	-5.5e-11	-5.4375e-11	-6.9375e-11	-5.3125e-11		-3.9375e-11	-3.9375e-11	-4.28125e-11	-4.65625e-11	-4.5e-11	-4.15625e-11	-4.15625e-11	-4.03125e-11	-4.5e-11	-4.03125e-11	-3.75e-11	-3.90625e-11	-3.84375e-11
-7.53125e-11	-6.6875e-11	-6.71875e-11	-5.53125e-11	-4.75e-11	-6.15625e-11	-5.8125e-11	-6.5e-11	-6.5625e-11	-6.65625e-11	-6.21875e-11	-6.5625e-11	-5.0625e-11		-4.78125e-11	-4.03125e-11	-4.28125e-11	-4.34375e-11	-3.8125e-11	-4.1875e-11	-3.8125e-11	-4.03125e-11	-4.15625e-11	-3.65625e-11	-3.40625e-11	-3.46875e-11	-3.90625e-11
-8.0625e-11	-6.375e-11	-6.6875e-11	-6.40625e-11	-5.53125e-11	-5.71875e-11	-5.78125e-11	-5.78125e-11	-6e-11	-6.59375e-11	-6.03125e-11	-6.9375e-11	-6.09375e-11		-4.40625e-11	-4.34375e-11	-4.25e-11	-3.75e-11	-4.5e-11	-4.03125e-11	-3.9375e-11	-4.34375e-11	-3.65625e-11	-3.90625e-11	-4.15625e-11	-3.4375e-11	-3.40625e-11
-7.28125e-11	-6.25e-11	-7.09375e-11	-6.53125e-11	-5.3125e-11	-6.5625e-11	-5.21875e-11	-6.1875e-11	-6.21875e-11	-5.28125e-11	-5.96875e-11	-6.28125e-11	-6.09375e-11		-4.5e-11	-4.21875e-11	-4.34375e-11	-3.84375e-11	-4.46875e-11	-4.53125e-11	-4.125e-11	-4.34375e-11	-3.84375e-11	-4.03125e-11	-3.78125e-11	-3.875e-11	-4.03125e-11
-7.21875e-11	-6.34375e-11	-6.875e-11	-6e-11	-5.5625e-11	-6.5e-11	-5.15625e-11	-6.25e-11	-6.125e-11	-5.8125e-11	-6.09375e-11	-6.1875e-11	-5.71875e-11		-4.65625e-11	-4.5e-11	-4.03125e-11	-4.40625e-11	-4.59375e-11	-4.1875e-11	-4.53125e-11	-4.3125e-11	-3.84375e-11	-3.78125e-11	-3.90625e-11	-3.8125e-11	-4.1875e-11
-7.21875e-11	-6.96875e-11	-6.75e-11	-6.5e-11	-5.21875e-11	-6.28125e-11	-5.375e-11	-6.25e-11	-6.09375e-11	-5.28125e-11	-6.34375e-11	-7.1875e-11	-5.96875e-11		-4.65625e-11	-4.8125e-11	-3.90625e-11	-4.28125e-11	-4.375e-11	-4.125e-11	-4.6875e-11	-4.71875e-11	-3.875e-11	-4.0625e-11	-4.34375e-11	-3.875e-11	-4.1875e-11
-8.03125e-11	-5.6875e-11	-6.03125e-11	-6.03125e-11	-5.59375e-11	-6.59375e-11	-5.90625e-11	-5.21875e-11	-6.09375e-11	-6.40625e-11	-6.4375e-11	-6.125e-11	-5.59375e-11		-4.5625e-11	-4.21875e-11	-4.15625e-11	-3.75e-11	-4.28125e-11	-4.28125e-11	-4.09375e-11	-4.5e-11	-4.1875e-11	-4.15625e-11	-4.03125e-11	-3.4375e-11	-4.15625e-11
-8.53125e-11	-6.53125e-11	-6.28125e-11	-6.9375e-11	-5.21875e-11	-6.625e-11	-6.03125e-11	-6.03125e-11	-6.53125e-11	-5.65625e-11	-6.03125e-11	-7e-11	-5.53125e-11		-4.34375e-11	-4.53125e-11	-4.625e-11	-3.4375e-11	-4.375e-11	-4.1875e-11	-4.09375e-11	-3.90625e-11	-4.46875e-11	-4.1875e-11	-3.34375e-11	-3.6875e-11	-3.65625e-11
-7.46875e-11	-6.21875e-11	-6.71875e-11	-7.53125e-11	-5.5e-11	-5.96875e-11	-5.46875e-11	-5.78125e-11	-5.9375e-11	-5.84375e-11	-6.03125e-11	-7e-11	-5.21875e-11		-4.09375e-11	-4.5e-11	-4.59375e-11	-3.65625e-11	-3.65625e-11	-4.3125e-11	-4.34375e-11	-4.15625e-11	-4.28125e-11	-3.8125e-11	-3.5625e-11	-3.90625e-11	-3.5e-11
-7.3125e-11	-6.5e-11	-6.5e-11	-6.03125e-11	-6.03125e-11	-6e-11	-5.5e-11	-6.53125e-11	-6.21875e-11	-6.1875e-11	-6.71875e-11	-6.03125e-11	-5.21875e-11		-4.5e-11	-4.1875e-11	-4.09375e-11	-4.25e-11	-3.875e-11	-4.375e-11	-4.09375e-11	-4.4375e-11	-4.375e-11	-3.90625e-11	-4.1875e-11	-3.8125e-11	-4.09375e-11
-7.96875e-11	-5.65625e-11	-7e-11	-6.9375e-11	-5.40625e-11	-5.8125e-11	-5.5e-11	-6.46875e-11	-5.8125e-11	-5.5625e-11	-6.46875e-11	-6.5e-11	-5.5625e-11		-4.34375e-11	-3.9375e-11	-4.0625e-11	-4.34375e-11	-4.53125e-11	-4.03125e-11	-4.03125e-11	-4.34375e-11	-3.53125e-11	-4.34375e-11	-4.0625e-11	-3.40625e-11	-3.875e-11
-7.3125e-11	-6.34375e-11	-6.5e-11	-6.5e-11	-5e-11	-5.96875e-11	-5.375e-11	-6.625e-11	-6.59375e-11	-5.875e-11	-5.65625e-11	-6.4375e-11	-5.90625e-11		-4.09375e-11	-4.15625e-11	-4.3125e-11	-4.65625e-11	-4.4375e-11	-3.4375e-11	-3.8125e-11	-4.4375e-11	-3.6875e-11	-3.53125e-11	-4.15625e-11	-3.875e-11	-3.46875e-11
-7.59375e-11	-6.15625e-11	-7.09375e-11	-6.0625e-11	-5.5625e-11	-6.34375e-11	-5.65625e-11	-6.5e-11	-5.65625e-11	-6.65625e-11	-6.0625e-11	-7.28125e-11	-5.71875e-11		-3.75e-11	-4.09375e-11	-4.375e-11	-4.6875e-11	-4.21875e-11	-3.6875e-11	-4.09375e-11	-4.4375e-11	-3.84375e-11	-3.46875e-11	-4.25e-11	-4.03125e-11	-3.59375e-11
-7.8125e-11	-6.3125e-11	-6.5625e-11	-6.03125e-11	-5.34375e-11	-6.65625e-11	-5.71875e-11	-6.34375e-11	-6.5e-11	-5.59375e-11	-6.5e-11	-6.03125e-11	-5.90625e-11		-4.1875e-11	-4.375e-11	-4.21875e-11	-4.5e-11	-4.03125e-11	-3.90625e-11	-4.5e-11	-4.21875e-11	-3.375e-11	-3.46875e-11	-4.5e-11	-3.28125e-11	-3.5625e-11
-7.90625e-11	-6.59375e-11	-7.15625e-11	-6.3125e-11	-5.9375e-11	-6.5625e-11	-5.375e-11	-5.9375e-11	-5.28125e-11	-5.59375e-11	-6.09375e-11	-6.34375e-11	-5.78125e-11		-5.125e-11	-4.59375e-11	-4.03125e-11	-3.84375e-11	-3.71875e-11	-4.09375e-11	-4.5e-11	-4.59375e-11	-3.59375e-11	-3.9375e-11	-4.21875e-11	-3.4375e-11	-3.625e-11
-8.125e-11	-5.6875e-11	-7.5e-11	-5.28125e-11	-5.59375e-11	-6.5625e-11	-5.59375e-11	-6.71875e-11	-5.9375e-11	-6.15625e-11	-6.78125e-11	-6.3125e-11	-6.125e-11		-4.71875e-11	-4.28125e-11	-4.4375e-11	-3.5e-11	-4.21875e-11	-4.65625e-11	-4.15625e-11	-4.15625e-11	-3.40625e-11	-4.15625e-11	-3.875e-11	-3.53125e-11	-3.59375e-11
-7.6875e-11	-6.15625e-11	-6.71875e-11	-6e-11	-5.09375e-11	-6.53125e-11	-5.625e-11	-6.40625e-11	-5.78125e-11	-6.8125e-11	-6.09375e-11	-6.46875e-11	-5.90625e-11		-4.28125e-11	-4.28125e-11	-4.375e-11	-4.03125e-11	-4.15625e-11	-4.53125e-11	-3.5625e-11	-4.4375e-11	-3.84375e-11	-4.03125e-11	-3.84375e-11	-3.84375e-11	-3.78125e-11
-7.78125e-11	-7.03125e-11	-6.125e-11	-6.21875e-11	-5.34375e-11	-6.28125e-11	-5.1875e-11	-6.6875e-11	-4.9375e-11	-5.53125e-11	-6.46875e-11	-5.65625e-11	-5.9375e-11		-3.84375e-11	-4.40625e-11	-4.5625e-11	-4.78125e-11	-4.5e-11	-3.90625e-11	-4.125e-11	-4.6875e-11	-3.875e-11	-4.09375e-11	-3.84375e-11	-3.875e-11	-3.9375e-11
-8.03125e-11	-6.21875e-11	-6.59375e-11	-6.0625e-11	-5.96875e-11	-5.84375e-11	-5.59375e-11	-6.875e-11	-5.6875e-11	-5.53125e-11	-6.03125e-11	-6.59375e-11	-5.625e-11		-4.21875e-11	-4.1875e-11	-4.46875e-11	-4.53125e-11	-5.28125e-11	-3.6875e-11	-4.5e-11	-4.28125e-11	-3.84375e-11	-3.8125e-11	-3.84375e-11	-3.75e-11	-4.1875e-11
-8.28125e-11	-6.5e-11	-6.90625e-11	-5.96875e-11	-5.375e-11	-5.4375e-11	-5.03125e-11	-6.25e-11	-6.15625e-11	-6.53125e-11	-6.03125e-11	-6.375e-11	-5.0625e-11		-4.9375e-11	-4.28125e-11	-4.28125e-11	-4.46875e-11	-4.59375e-11	-3.59375e-11	-4.1875e-11	-4.21875e-11	-4.28125e-11	-3.75e-11	-4.1875e-11	-3.3125e-11	-4.09375e-11
-7.28125e-11	-6.40625e-11	-6.8125e-11	-5.59375e-11	-6.03125e-11	-5.78125e-11	-5.9375e-11	-5.46875e-11	-5.84375e-11	-5.59375e-11	-5.96875e-11	-6.40625e-11	-5.96875e-11		-4.78125e-11	-4.375e-11	-4.15625e-11	-4.71875e-11	-4.03125e-11	-4.3125e-11	-4.28125e-11	-4.5625e-11	-4.15625e-11	-4.46875e-11	-3.6875e-11	-3.59375e-11	-3.78125e-11
-8.71875e-11	-6.40625e-11	-6.84375e-11	-6.46875e-11	-5.875e-11	-6.15625e-11	-5.0625e-11	-6.34375e-11	-5.28125e-11	-6.34375e-11	-6.40625e-11	-6.46875e-11	-5.75e-11		-4.09375e-11	-3.65625e-11	-3.96875e-11	-4.5e-11	-3.90625e-11	-3.78125e-11	-4.21875e-11	-4.21875e-11	-4.03125e-11	-3.84375e-11	-3.28125e-11	-3.65625e-11	-3.53125e-11
-7.78125e-11	-6e-11	-5.90625e-11	-6.65625e-11	-5.40625e-11	-6.28125e-11	-5.46875e-11	-5.875e-11	-6.84375e-11	-6.46875e-11	-6.375e-11	-6.15625e-11	-5.28125e-11		-4.28125e-11	-4.0625e-11	-4.625e-11	-3.5625e-11	-4.34375e-11	-4.15625e-11	-4.4375e-11	-4.3125e-11	-4.28125e-11	-3.5625e-11	-3.09375e-11	-3.59375e-11	-3.9375e-11
-7.5625e-11	-7e-11	-6.46875e-11	-5.84375e-11	-5.59375e-11	-5.96875e-11	-5.3125e-11	-6.40625e-11	-5.78125e-11	-6.28125e-11	-5.9375e-11	-6.53125e-11	-5.40625e-11		-4.71875e-11	-4.03125e-11	-4.53125e-11	-3.75e-11	-4.40625e-11	-4.03125e-11	-4.09375e-11	-3.71875e-11	-4.25e-11	-4.375e-11	-3.5e-11	-3.625e-11	-3.90625e-11
-7.78125e-11	-6e-11	-6.75e-11	-6.34375e-11	-5.84375e-11	-6.59375e-11	-5.875e-11	-6.09375e-11	-5.53125e-11	-5.9375e-11	-6.46875e-11	-6.09375e-11	-5.15625e-11		-4.15625e-11	-4.53125e-11	-4.40625e-11	-3.9375e-11	-4.28125e-11	-4.09375e-11	-3.75e-11	-4.28125e-11	-4.3125e-11	-4.21875e-11	-3.65625e-11	-3.71875e-11	-4.3125e-11
-7.03125e-11	-6.65625e-11	-7.21875e-11	-6.15625e-11	-5.875e-11	-6.59375e-11	-5.5e-11	-6.34375e-11	-5.4375e-11	-5.875e-11	-5.59375e-11	-5.96875e-11	-5.75e-11		-4.34375e-11	-4.5625e-11	-4.3125e-11	-4.03125e-11	-4.25e-11	-3.65625e-11	-4.03125e-11	-4.46875e-11	-4.28125e-11	-3.84375e-11	-4.0625e-11	-3.75e-11	-4.28125e-11
-8.1875e-11	-6.78125e-11	-6.15625e-11	-6.78125e-11	-5.90625e-11	-5.5e-11	-5.9375e-11	-5.65625e-11	-5.96875e-11	-6.03125e-11	-5.59375e-11	-6.125e-11	-5.8125e-11		-4.5625e-11	-4.71875e-11	-4.03125e-11	-3.78125e-11	-4.375e-11	-4.1875e-11	-3.875e-11	-4.46875e-11	-4.03125e-11	-4.28125e-11	-4.03125e-11	-3.46875e-11	-4.03125e-11
-7.53125e-11	-6.90625e-11	-6.84375e-11	-5.9375e-11	-5.96875e-11	-5.59375e-11	-5.4375e-11	-6.5e-11	-5.5e-11	-6.90625e-11	-6.28125e-11	-6.28125e-11	-5.9375e-11		-4.28125e-11	-4.5625e-11	-4.4375e-11	-4.28125e-11	-4.0625e-11	-4.40625e-11	-4.875e-11	-4.09375e-11	-3.9375e-11	-4.21875e-11	-4.03125e-11	-3.34375e-11	-3.90625e-11
-7.78125e-11	-6.8125e-11	-6.84375e-11	-6.59375e-11	-5.78125e-11	-6.40625e-11	-6.09375e-11	-5.96875e-11	-5.9375e-11	-5.65625e-11	-6e-11	-6.78125e-11	-5.5e-11		-4.375e-11	-4.46875e-11	-4.40625e-11	-4.25e-11	-4.4375e-11	-4.3125e-11	-4.3125e-11	-4.40625e-11	-4.0625e-11	-3.875e-11	-3.34375e-11	-3.625e-11	-3.96875e-11
-8.21875e-11	-6.65625e-11	-6.09375e-11	-7.03125e-11	-6.0625e-11	-6.25e-11	-4.78125e-11	-6.59375e-11	-6.1875e-11	-6.53125e-11	-6.40625e-11	-5.8125e-11	-5.5e-11		-4.46875e-11	-4.59375e-11	-4.34375e-11	-4.25e-11	-4.3125e-11	-4.09375e-11	-4.03125e-11	-4.6875e-11	-4.09375e-11	-3.9375e-11	-3.71875e-11	-3.65625e-11	-4.15625e-11
-8.03125e-11	-6.28125e-11	-6.4375e-11	-6.46875e-11	-4.65625e-11	-6.375e-11	-4.78125e-11	-6.625e-11	-6.59375e-11	-5.53125e-11	-5.9375e-11	-6.5e-11	-5.59375e-11		-4.5e-11	-3.71875e-11	-4.0625e-11	-4.40625e-11	-3.75e-11	-4.09375e-11	-3.875e-11	-4.75e-11	-3.84375e-11	-3.34375e-11	-3.78125e-11	-3.78125e-11	-3.59375e-11
-8.34375e-11	-6.28125e-11	-6.5e-11	-6.28125e-11	-6.03125e-11	-5.71875e-11	-5.28125e-11	-6.5625e-11	-5.5e-11	-5.75e-11	-7e-11	-5.8125e-11	-5.34375e-11		-4.03125e-11	-3.8125e-11	-4.0625e-11	-4.03125e-11	-4.03125e-11	-4.15625e-11	-3.75e-11	-3.84375e-11	-4.09375e-11	-3.34375e-11	-3.03125e-11	-3.5625e-11	-3.4375e-11
-7.46875e-11	-6.3125e-11	-6.5e-11	-6.53125e-11	-5.5e-11	-6.59375e-11	-5.53125e-11	-6.25e-11	-5.84375e-11	-6.125e-11	-6.21875e-11	-5.96875e-11	-5.84375e-11		-4.125e-11	-4.0625e-11	-4.65625e-11	-3.90625e-11	-4.71875e-11	-4.03125e-11	-4.375e-11	-3.78125e-11	-4.25e-11	-4.21875e-11	-3.5e-11	-3.65625e-11	-3.8125e-11
-7.65625e-11	-5.90625e-11	-5.96875e-11	-5.53125e-11	-5.625e-11	-7.4375e-11	-5.15625e-11	-5.4375e-11	-5.78125e-11	-5.65625e-11	-6.59375e-11	-6e-11	-5.25e-11		-4.0625e-11	-4.75e-11	-4.65625e-11	-3.78125e-11	-5.03125e-11	-4.15625e-11	-4.1875e-11	-4.3125e-11	-3.78125e-11	-4.71875e-11	-3.78125e-11	-4.28125e-11	-3.8125e-11
-7.78125e-11	-6.71875e-11	-6.15625e-11	-5.46875e-11	-5.53125e-11	-5.9375e-11	-5.375e-11	-5.53125e-11	-5.78125e-11	-5.28125e-11	-6.15625e-11	-6.34375e-11	-6.21875e-11		-4.03125e-11	-4.8125e-11	-4.1875e-11	-4.0625e-11	-4.3125e-11	-4.75e-11	-3.78125e-11	-4.03125e-11	-3.59375e-11	-3.84375e-11	-4.03125e-11	-3.84375e-11	-4.15625e-11
-7.34375e-11	-6.125e-11	-6.28125e-11	-6.09375e-11	-6.25e-11	-6.5625e-11	-5.34375e-11	-6.34375e-11	-5.6875e-11	-5.9375e-11	-6.65625e-11	-6.9375e-11	-6.0625e-11		-3.65625e-11	-4.15625e-11	-4.625e-11	-4.625e-11	-4.4375e-11	-4.46875e-11	-3.96875e-11	-4.25e-11	-3.90625e-11	-3.46875e-11	-3.53125e-11	-3.5625e-11	-4.09375e-11
-8.03125e-11	-6.09375e-11	-6.09375e-11	-6.59375e-11	-5.6875e-11	-5.65625e-11	-5.375e-11	-6.03125e-11	-5.53125e-11	-6e-11	-5.71875e-11	-6.53125e-11	-6.125e-11		-4.34375e-11	-4.125e-11	-4.21875e-11	-4.40625e-11	-4.1875e-11	-4.03125e-11	-4.28125e-11	-4.6875e-11	-4.03125e-11	-3.8125e-11	-3.8125e-11	-3.5e-11	-3.5625e-11
-8.28125e-11	-6.4375e-11	-6.75e-11	-6.4375e-11	-5.46875e-11	-6.09375e-11	-5.5625e-11	-6.34375e-11	-6.03125e-11	-6.0625e-11	-5.625e-11	-6.5e-11	-5.90625e-11		-4.90625e-11	-4.375e-11	-4.53125e-11	-4.09375e-11	-3.9375e-11	-3.8125e-11	-4.1875e-11	-4.71875e-11	-3.5e-11	-3.90625e-11	-4.15625e-11	-3.65625e-11	-3.8125e-11
-7.375e-11	-5.65625e-11	-5.90625e-11	-6.15625e-11	-5.03125e-11	-5.59375e-11	-5.5e-11	-5.875e-11	-6.125e-11	-5.875e-11	-6.3125e-11	-6.65625e-11	-6.15625e-11		-4.53125e-11	-4.28125e-11	-4.15625e-11	-4.0625e-11	-4.15625e-11	-4.15625e-11	-4.09375e-11	-3.71875e-11	-3.875e-11	-3.90625e-11	-3.875e-11	-3.28125e-11	-3.9375e-11
-7.46875e-11	-6.375e-11	-6.34375e-11	-6.40625e-11	-5.90625e-11	-6.40625e-11	-5.34375e-11	-6.4375e-11	-5.9375e-11	-6.125e-11	-6.21875e-11	-6.28125e-11	-5.78125e-11		-4.25e-11	-3.71875e-11	-4.4375e-11	-4.5e-11	-3.625e-11	-4.125e-11	-4.03125e-11	-3.21875e-11	-3.875e-11	-4.03125e-11	-4.03125e-11	-3.6875e-11	-3.4375e-11
-7.59375e-11	-7.125e-11	-6.59375e-11	-6.15625e-11	-6.09375e-11	-5.96875e-11	-5.5e-11	-6.125e-11	-6.5625e-11	-5.96875e-11	-6.0625e-11	-6.5e-11	-5.375e-11		-4.6875e-11	-3.65625e-11	-4.34375e-11	-4.46875e-11	-3.6875e-11	-4.03125e-11	-4.59375e-11	-4.25e-11	-4.21875e-11	-3.59375e-11	-3.71875e-11	-3.84375e-11	-3.65625e-11
-7.6875e-11	-5.78125e-11	-6.8125e-11	-6.5625e-11	-5.3125e-11	-5.8125e-11	-5.71875e-11	-6.15625e-11	-6.59375e-11	-5.625e-11	-5.90625e-11	-6.46875e-11	-5.84375e-11		-4.28125e-11	-4.28125e-11	-4.40625e-11	-4.0625e-11	-3.9375e-11	-3.65625e-11	-4.34375e-11	-4.1875e-11	-4.125e-11	-4.03125e-11	-4.25e-11	-3.6875e-11	-3.71875e-11
-7.34375e-11	-5.78125e-11	-6.375e-11	-6.03125e-11	-5.5e-11	-6.15625e-11	-5.46875e-11	-6.46875e-11	-5.9375e-11	-5.96875e-11	-6.5e-11	-6.34375e-11	-5.40625e-11		-4.34375e-11	-4.5625e-11	-4.25e-11	-4.34375e-11	-3.75e-11	-4.125e-11	-3.28125e-11	-4.5e-11	-3.75e-11	-4.0625e-11	-3.4375e-11	-3.78125e-11	-4.15625e-11
-7.5e-11	-5.53125e-11	-6.5625e-11	-6.6875e-11	-5.71875e-11	-6.3125e-11	-5.59375e-11	-5.96875e-11	-6.4375e-11	-6e-11	-5.9375e-11	-6.34375e-11	-5.90625e-11		-4.1875e-11	-4.40625e-11	-4.5e-11	-4.9375e-11	-3.75e-11	-4.03125e-11	-3.75e-11	-4.65625e-11	-3.90625e-11	-3.71875e-11	-4.15625e-11	-3.625e-11	-3.84375e-11
-8.15625e-11	-6.0625e-11	-5.875e-11	-6.15625e-11	-5.9375e-11	-6.3125e-11	-5.46875e-11	-6.375e-11	-6.03125e-11	-6.15625e-11	-6.625e-11	-6e-11	-5.96875e-11		-4.1875e-11	-4.46875e-11	-4.59375e-11	-4.0625e-11	-4.03125e-11	-3.78125e-11	-4.40625e-11	-4.53125e-11	-3.90625e-11	-3.78125e-11	-4.28125e-11	-3.5e-11	-3.90625e-11
-7.40625e-11	-6.5e-11	-6.71875e-11	-6.03125e-11	-5.5e-11	-6.78125e-11	-5.34375e-11	-6.3125e-11	-7e-11	-6.03125e-11	-6.15625e-11	-5.875e-11	-5.03125e-11		-4.40625e-11	-4.625e-11	-4.78125e-11	-4.03125e-11	-4.15625e-11	-3.6875e-11	-4.03125e-11	-4.5e-11	-4.15625e-11	-3.46875e-11	-4.1875e-11	-4.40625e-11	-4.0625e-11
-7.46875e-11	-6.75e-11	-5.84375e-11	-6.65625e-11	-5.78125e-11	-6.09375e-11	-5.75e-11	-6.28125e-11	-5.8125e-11	-5.96875e-11	-6.4375e-11	-6.5e-11	-5.90625e-11		-4.15625e-11	-4.90625e-11	-4.3125e-11	-4.59375e-11	-3.59375e-11	-3.90625e-11	-4.15625e-11	-4.1875e-11	-4.15625e-11	-3.875e-11	-4.15625e-11	-4.28125e-11	-3.53125e-11
-8.21875e-11	-7e-11	-6.5e-11	-6.125e-11	-5.71875e-11	-6.1875e-11	-5.40625e-11	-6.59375e-11	-6.125e-11	-5.8125e-11	-6.8125e-11	-6.78125e-11	-5.9375e-11		-4.28125e-11	-3.59375e-11	-4.5e-11	-4.5625e-11	-4.0625e-11	-3.90625e-11	-3.71875e-11	-4.21875e-11	-4.15625e-11	-3.71875e-11	-3.8125e-11	-3.46875e-11	-3.5625e-11
-7.28125e-11	-6.53125e-11	-6.71875e-11	-6.40625e-11	-5.78125e-11	-6.34375e-11	-4.96875e-11	-6.25e-11	-5.84375e-11	-6.15625e-11	-6.28125e-11	-4.65625e-11	-5.5e-11		-3.90625e-11	-3.875e-11	-4.375e-11	-4e-11	-3.875e-11	-3.875e-11	-3.96875e-11	-3.59375e-11	-3.6875e-11	-3.75e-11	-3.71875e-11	-3.40625e-11	-3.75e-11
-8.15625e-11	-6.625e-11	-6.1875e-11	-5.5e-11	-5.78125e-11	-6.53125e-11	-5.25e-11	-5.5e-11	-6.03125e-11	-6.125e-11	-5.625e-11	-6.65625e-11	-4.90625e-11		-4.40625e-11	-4.5625e-11	-4.40625e-11	-3.84375e-11	-3.9375e-11	-3.875e-11	-4.25e-11	-3.53125e-11	-3.8125e-11	-3.59375e-11	-4.09375e-11	-3.8125e-11	-4.25e-11
-7.4375e-11	-6.8125e-11	-5.96875e-11	-5.53125e-11	-5.78125e-11	-6.15625e-11	-6e-11	-5.78125e-11	-6.375e-11	-6.03125e-11	-6.625e-11	-6.03125e-11	-5.53125e-11		-5.21875e-11	-4.15625e-11	-4.71875e-11	-4.125e-11	-4.03125e-11	-3.8125e-11	-4.28125e-11	-4.28125e-11	-3.84375e-11	-3.90625e-11	-3.71875e-11	-3.6875e-11	-3.65625e-11
-7.15625e-11	-6.65625e-11	-6.40625e-11	-6.375e-11	-4.59375e-11	-6.1875e-11	-6.28125e-11	-5.625e-11	-6.125e-11	-6.09375e-11	-5.5625e-11	-6.28125e-11	-5.6875e-11		-4.5e-11	-3.90625e-11	-4.6875e-11	-4.03125e-11	-4.40625e-11	-4.0625e-11	-4.4375e-11	-4.84375e-11	-3.75e-11	-4.28125e-11	-4.09375e-11	-3.78125e-11	-3.75e-11
-8.15625e-11	-6.84375e-11	-6.71875e-11	-6.21875e-11	-5.3125e-11	-6.125e-11	-5.78125e-11	-6.03125e-11	-5.96875e-11	-6.96875e-11	-6.46875e-11	-5.625e-11	-5.4375e-11		-4.40625e-11	-4.28125e-11	-4.53125e-11	-4.375e-11	-4.28125e-11	-4.0625e-11	-3.9375e-11	-4.75e-11	-4.1875e-11	-4.28125e-11	-3.875e-11	-4.03125e-11	-4.28125e-11
-8.21875e-11	-6.84375e-11	-6.09375e-11	-5.96875e-11	-5.5625e-11	-6.40625e-11	-5.90625e-11	-6.03125e-11	-6.28125e-11	-5.78125e-11	-5.84375e-11	-5.25e-11	-5.4375e-11		-4.1875e-11	-4.03125e-11	-3.84375e-11	-4.40625e-11	-4.0625e-11	-4.5e-11	-4.4375e-11	-3.78125e-11	-4.21875e-11	-4.40625e-11	-3.71875e-11	-3.46875e-11	-3.59375e-11
-7.84375e-11	-6.84375e-11	-6.1875e-11	-6.09375e-11	-5.90625e-11	-6.96875e-11	-5e-11	-6.53125e-11	-6.875e-11	-6.03125e-11	-6.28125e-11	-6.9375e-11	-5.46875e-11		-4.59375e-11	-3.625e-11	-4.03125e-11	-4.3125e-11	-3.9375e-11	-4.3125e-11	-4.5625e-11	-4.3125e-11	-3.84375e-11	-3.5e-11	-3.8125e-11	-3.4375e-11	-3.03125e-11
-7.15625e-11	-6.4375e-11	-5.90625e-11	-5.40625e-11	-5.28125e-11	-6.71875e-11	-5.53125e-11	-5.71875e-11	-6.5e-11	-5.0625e-11	-6.40625e-11	-6.40625e-11	-5.25e-11		-4.40625e-11	-4.34375e-11	-4.09375e-11	-4.1875e-11	-4.03125e-11	-4.03125e-11	-4.03125e-11	-4.4375e-11	-4.03125e-11	-3.5e-11	-4.28125e-11	-3.34375e-11	-3.59375e-11
-7.90625e-11	-6.5e-11	-6.53125e-11	-5.8125e-11	-5.09375e-11	-6.375e-11	-6.15625e-11	-6.1875e-11	-6.875e-11	-6.03125e-11	-5.40625e-11	-6.625e-11	-5.125e-11		-4.5e-11	-4.4375e-11	-4.4375e-11	-4.125e-11	-4.25e-11	-3.875e-11	-4.03125e-11	-3.90625e-11	-4.15625e-11	-3.90625e-11	-4.125e-11	-3.6875e-11	-3.5e-11
-7e-11	-5.78125e-11	-7.1875e-11	-5.25e-11	-5.5625e-11	-6.09375e-11	-5.15625e-11	-6.40625e-11	-6.71875e-11	-5.1875e-11	-6.5625e-11	-6.625e-11	-6.25e-11		-4.8125e-11	-4.0625e-11	-3.75e-11	-4.3125e-11	-4.375e-11	-3.6875e-11	-4.375e-11	-4.09375e-11	-4.4375e-11	-3.9375e-11	-4.46875e-11	-3.65625e-11	-3.96875e-11
-7.3125e-11	-6.46875e-11	-6.40625e-11	-6.03125e-11	-5.84375e-11	-6.375e-11	-5.375e-11	-6.53125e-11	-6.09375e-11	-6.09375e-11	-6.28125e-11	-6.3125e-11	-5.8125e-11		-4.5e-11	-4.03125e-11	-3.84375e-11	-4.03125e-11	-4.09375e-11	-4.28125e-11	-4.03125e-11	-4.28125e-11	-4.03125e-11	-3.53125e-11	-4.03125e-11	-3.8125e-11	-3.90625e-11
-7.71875e-11	-6.6875e-11	-6.65625e-11	-5.8125e-11	-5.53125e-11	-6.21875e-11	-5.4375e-11	-6.09375e-11	-6.5e-11	-6.34375e-11	-6.09375e-11	-6e-11	-6.28125e-11		-4.5e-11	-4.3125e-11	-4.09375e-11	-4.15625e-11	-4.34375e-11	-3.96875e-11	-4.0625e-11	-4.46875e-11	-4.1875e-11	-3.78125e-11	-3.90625e-11	-3.96875e-11	-4.15625e-11
-7.84375e-11	-6.5625e-11	-6.34375e-11	-5.9375e-11	-5.375e-11	-6.03125e-11	-4.9375e-11	-5.9375e-11	-6.25e-11	-6.40625e-11	-6.28125e-11	-6.65625e-11	-5.1875e-11		-3.90625e-11	-4.375e-11	-4.40625e-11	-4.34375e-11	-4.4375e-11	-3.75e-11	-4.59375e-11	-3.90625e-11	-3.84375e-11	-4.15625e-11	-3.84375e-11	-3.65625e-11	-4.15625e-11
-8.03125e-11	-5.9375e-11	-6.90625e-11	-5.90625e-11	-5.59375e-11	-5.84375e-11	-5.59375e-11	-5.875e-11	-6.65625e-11	-6.21875e-11	-6.03125e-11	-6.375e-11	-5.59375e-11		-4.28125e-11	-4.28125e-11	-4.84375e-11	-3.96875e-11	-4.125e-11	-3.75e-11	-4.28125e-11	-4.1875e-11	-3.78125e-11	-3.8125e-11	-3.5e-11	-3.78125e-11	-4.15625e-11
-7.90625e-11	-5.96875e-11	-5.46875e-11	-6.375e-11	-5.875e-11	-6.71875e-11	-4.84375e-11	-6.09375e-11	-6.34375e-11	-6.15625e-11	-6.0625e-11	-6.84375e-11	-5.40625e-11		-4.75e-11	-4.03125e-11	-4.75e-11	-4.0625e-11	-4.21875e-11	-3.78125e-11	-3.90625e-11	-4.09375e-11	-4.1875e-11	-3.6875e-11	-3.1875e-11	-3.8125e-11	-3.9375e-11
-7.09375e-11	-5.8125e-11	-6.71875e-11	-5.90625e-11	-5.40625e-11	-6.8125e-11	-5.5e-11	-5.96875e-11	-6.28125e-11	-5.84375e-11	-6.65625e-11	-7.1875e-11	-6.40625e-11		-4.53125e-11	-3.84375e-11	-4.1875e-11	-3.96875e-11	-4.21875e-11	-3.84375e-11	-4.15625e-11	-4.0625e-11	-4.21875e-11	-3.75e-11	-3.59375e-11	-3.96875e-11	-3.40625e-11
-7.40625e-11	-5.6875e-11	-6.8125e-11	-5.34375e-11	-5.28125e-11	-5.90625e-11	-5.3125e-11	-6.21875e-11	-6.28125e-11	-6.59375e-11	-6.46875e-11	-6.71875e-11	-5.15625e-11		-4.3125e-11	-3.78125e-11	-4.21875e-11	-4.46875e-11	-4.5625e-11	-4.28125e-11	-4.5e-11	-4.21875e-11	-3.9375e-11	-3.25e-11	-3.84375e-11	-3.5625e-11	-3.3125e-11
-7.65625e-11	-6.78125e-11	-6.21875e-11	-6.875e-11	-6.28125e-11	-6.15625e-11	-5.34375e-11	-5.96875e-11	-6.125e-11	-5.78125e-11	-6.125e-11	-6.5e-11	-5.03125e-11		-4.09375e-11	-4.09375e-11	-4.34375e-11	-4.5625e-11	-4.40625e-11	-4.125e-11	-4.34375e-11	-4.15625e-11	-3.71875e-11	-3.90625e-11	-3.9375e-11	-3.9375e-11	-3.5e-11
-7.28125e-11	-6.71875e-11	-7.0625e-11	-5.6875e-11	-5.21875e-11	-6.28125e-11	-5e-11	-5.75e-11	-6.90625e-11	-5.96875e-11	-6.28125e-11	-5.84375e-11	-4.875e-11		-4.4375e-11	-4.65625e-11	-4.53125e-11	-4.0625e-11	-4.03125e-11	-4.3125e-11	-3.8125e-11	-4.28125e-11	-4.15625e-11	-3.625e-11	-3.46875e-11	-3.375e-11	-3.8125e-11
-7.21875e-11	-6.15625e-11	-6.09375e-11	-5.25e-11	-5.625e-11	-6e-11	-5.21875e-11	-6.90625e-11	-5.9375e-11	-6.34375e-11	-5.90625e-11	-6.59375e-11	-5.5625e-11		-4.03125e-11	-4.0625e-11	-4.28125e-11	-3.84375e-11	-4.03125e-11	-4.09375e-11	-3.28125e-11	-3.90625e-11	-4.21875e-11	-4.53125e-11	-3.71875e-11	-4.03125e-11	-3.46875e-11
-7.09375e-11	-6.28125e-11	-6.84375e-11	-6.21875e-11	-5.15625e-11	-6.34375e-11	-5.875e-11	-6.4375e-11	-6.4375e-11	-6.53125e-11	-5.59375e-11	-7.53125e-11	-5.78125e-11		-3.625e-11	-3.71875e-11	-4.46875e-11	-4.5e-11	-4.1875e-11	-3.8125e-11	-3.03125e-11	-4.28125e-11	-3.90625e-11	-4.53125e-11	-4.15625e-11	-4.15625e-11	-3.4375e-11
-7.3125e-11	-6.875e-11	-6.1875e-11	-6.1875e-11	-5.53125e-11	-6.625e-11	-6.40625e-11	-5.84375e-11	-6.84375e-11	-6.46875e-11	-6.40625e-11	-6.78125e-11	-5.28125e-11		-4.46875e-11	-4.40625e-11	-4.53125e-11	-4.28125e-11	-4.0625e-11	-4.03125e-11	-3.8125e-11	-4.71875e-11	-3.71875e-11	-3.78125e-11	-3.78125e-11	-3.75e-11	-4.15625e-11
-6.40625e-11	-6.375e-11	-6.28125e-11	-5.65625e-11	-5.625e-11	-6.375e-11	-5.9375e-11	-6.5e-11	-6.21875e-11	-6.1875e-11	-5.21875e-11	-6.53125e-11	-5.71875e-11		-4.40625e-11	-4.65625e-11	-4.09375e-11	-3.90625e-11	-4.0625e-11	-4.28125e-11	-4.5e-11	-4.5e-11	-4.15625e-11	-3.59375e-11	-4.21875e-11	-3.5e-11	-4.15625e-11
-7.59375e-11	-6.875e-11	-6e-11	-5.625e-11	-5.65625e-11	-6.15625e-11	-5.78125e-11	-6.15625e-11	-6.21875e-11	-6.03125e-11	-6.75e-11	-5.9375e-11	-6.34375e-11		-4.15625e-11	-3.6875e-11	-4.65625e-11	-3.90625e-11	-4.09375e-11	-4.28125e-11	-4.03125e-11	-4.625e-11	-4.09375e-11	-3.53125e-11	-4.25e-11	-3.78125e-11	-4.03125e-11
-6.90625e-11	-6.53125e-11	-6.9375e-11	-5.9375e-11	-5.15625e-11	-6.84375e-11	-5.96875e-11	-6.625e-11	-6e-11	-6.40625e-11	-5.53125e-11	-6.59375e-11	-5.84375e-11		-4.4375e-11	-3.90625e-11	-4.65625e-11	-4.15625e-11	-4.5625e-11	-4.125e-11	-4.5e-11	-4.53125e-11	-4.5e-11	-3.90625e-11	-3.9375e-11	-3.46875e-11	-3.90625e-11
-7.5e-11	-7.40625e-11	-6.9375e-11	-5.90625e-11	-5.03125e-11	-6.03125e-11	-6.21875e-11	-6.5e-11	-6.65625e-11	-6.40625e-11	-5.53125e-11	-6.78125e-11	-5.59375e-11		-4.15625e-11	-4.03125e-11	-5e-11	-4.5e-11	-4.40625e-11	-4.28125e-11	-4.6875e-11	-4.40625e-11	-4.28125e-11	-3.875e-11	-4.34375e-11	-3.40625e-11	-3.8125e-11
-7.40625e-11	-6.375e-11	-6.03125e-11	-5.90625e-11	-6.46875e-11	-6.53125e-11	-6.34375e-11	-6.46875e-11	-6.21875e-11	-5.96875e-11	-6.03125e-11	-6.90625e-11	-5.09375e-11		-4.28125e-11	-3.8125e-11	-4.625e-11	-4.4375e-11	-4.125e-11	-3.9375e-11	-4.53125e-11	-4.0625e-11	-4.09375e-11	-4.03125e-11	-3.90625e-11	-3.65625e-11	-4.15625e-11
-7.5625e-11	-7.28125e-11	-7.28125e-11	-6.0625e-11	-5.875e-11	-6.09375e-11	-5.5625e-11	-6.375e-11	-6.5625e-11	-5.78125e-11	-5.84375e-11	-6.6875e-11	-5.71875e-11		-4.3125e-11	-3.90625e-11	-4.03125e-11	-4.46875e-11	-4.875e-11	-4.15625e-11	-4.28125e-11	-4.125e-11	-3.6875e-11	-3.71875e-11	-4.0625e-11	-3.90625e-11	-4.46875e-11
-7.46875e-11	-6.9375e-11	-6.375e-11	-5.375e-11	-5.1875e-11	-5.84375e-11	-5.5e-11	-6.25e-11	-6.375e-11	-5.71875e-11	-5.96875e-11	-7.1875e-11	-5.90625e-11		-4.875e-11	-4.5e-11	-3.46875e-11	-3.78125e-11	-4.71875e-11	-3.90625e-11	-3.8125e-11	-3.65625e-11	-4.0625e-11	-3.5625e-11	-3.65625e-11	-4.03125e-11	-4.53125e-11
-7.40625e-11	-6.8125e-11	-7e-11	-6.03125e-11	-5.46875e-11	-5.84375e-11	-4.65625e-11	-6.6875e-11	-6.21875e-11	-6.375e-11	-5.96875e-11	-6.46875e-11	-5.53125e-11		-4.28125e-11	-4.84375e-11	-3.9375e-11	-3.71875e-11	-4.5e-11	-3.59375e-11	-3.53125e-11	-4.28125e-11	-3.75e-11	-3.6875e-11	-4.09375e-11	-3.46875e-11	-4.15625e-11
-7.40625e-11	-7e-11	-6e-11	-6.5e-11	-5.5625e-11	-6.15625e-11	-5.46875e-11	-6.53125e-11	-6.4375e-11	-6.125e-11	-5.46875e-11	-6.28125e-11	-5.90625e-11		-4.03125e-11	-4.3125e-11	-4.3125e-11	-4.09375e-11	-4.125e-11	-4.09375e-11	-4.59375e-11	-4.5e-11	-3.375e-11	-3.71875e-11	-4.03125e-11	-3.125e-11	-4.03125e-11
-7.40625e-11	-7.3125e-11	-6.84375e-11	-6.5625e-11	-5.75e-11	-5.84375e-11	-5.625e-11	-6.03125e-11	-6.40625e-11	-5.59375e-11	-5.84375e-11	-6.4375e-11	-6.15625e-11		-4.03125e-11	-3.40625e-11	-4.0625e-11	-4.5e-11	-3.9375e-11	-4.28125e-11	-4.59375e-11	-4.5625e-11	-3.9375e-11	-4.40625e-11	-3.90625e-11	-3.4375e-11	-3.59375e-11
-7.46875e-11	-6.84375e-11	-6.5e-11	-5.90625e-11	-6.34375e-11	-5.90625e-11	-4.8125e-11	-5.5625e-11	-6.21875e-11	-6.21875e-11	-5.8125e-11	-6.6875e-11	-6.125e-11		-4.53125e-11	-3.65625e-11	-4.53125e-11	-4.3125e-11	-3.71875e-11	-4.28125e-11	-4.34375e-11	-3.90625e-11	-4.25e-11	-4.09375e-11	-4.03125e-11	-3.6875e-11	-4.09375e-11
-7.9375e-11	-6.53125e-11	-6.5625e-11	-6.03125e-11	-5.8125e-11	-5.75e-11	-5.09375e-11	-6.71875e-11	-6.5625e-11	-6.03125e-11	-6.21875e-11	-6.5625e-11	-5.28125e-11		-4.21875e-11	-4.125e-11	-4.34375e-11	-4.21875e-11	-4.15625e-11	-3.90625e-11	-4.125e-11	-4.15625e-11	-4.03125e-11	-4.03125e-11	-3.84375e-11	-3.59375e-11	-4.03125e-11
-6.90625e-11	-6.4375e-11	-6.5625e-11	-6.09375e-11	-5.34375e-11	-6.0625e-11	-5.875e-11	-6.15625e-11	-6.34375e-11	-6.125e-11	-6.09375e-11	-6.75e-11	-5.53125e-11		-4.65625e-11	-4.34375e-11	-4.40625e-11	-4.03125e-11	-4.375e-11	-4.03125e-11	-3.96875e-11	-4.96875e-11	-4.0625e-11	-3.96875e-11	-3.875e-11	-3.78125e-11	-3.53125e-11
-7.9375e-11	-7.8125e-11	-6.5e-11	-5.96875e-11	-5.5e-11	-6.5e-11	-4.9375e-11	-6.53125e-11	-6.21875e-11	-5.96875e-11	-6.375e-11	-6.84375e-11	-5.65625e-11		-4.90625e-11	-4.4375e-11	-4.59375e-11	-4.0625e-11	-4.1875e-11	-3.875e-11	-4.0625e-11	-4.59375e-11	-4.09375e-11	-3.65625e-11	-4.0625e-11	-3.75e-11	-4.03125e-11
-7.90625e-11	-7.25e-11	-6.4375e-11	-6.21875e-11	-5.84375e-11	-6.03125e-11	-5.6875e-11	-6.625e-11	-6.1875e-11	-6.65625e-11	-5.8125e-11	-6.34375e-11	-5.78125e-11		-4.40625e-11	-4.3125e-11	-4.375e-11	-4.15625e-11	-4.40625e-11	-3.8125e-11	-4.5625e-11	-3.84375e-11	-4.1875e-11	-3.34375e-11	-4.09375e-11	-3.28125e-11	-3.9375e-11
-8.125e-11	-7.375e-11	-7.25e-11	-5.78125e-11	-5.5e-11	-6.21875e-11	-5.71875e-11	-6.1875e-11	-6.1875e-11	-5.875e-11	-6.1875e-11	-6.4375e-11	-5.6875e-11		-4.25e-11	-3.96875e-11	-4.375e-11	-4.28125e-11	-4.34375e-11	-4.0625e-11	-4.03125e-11	-4.03125e-11	-4.03125e-11	-3.4375e-11	-3.9375e-11	-3.40625e-11	-3.90625e-11
-7.8125e-11	-6.21875e-11	-6.34375e-11	-5.5e-11	-5.53125e-11	-6.3125e-11	-6.375e-11	-6.53125e-11	-6.21875e-11	-6.40625e-11	-6e-11	-6.5e-11	-5.46875e-11		-4.1875e-11	-4.0625e-11	-4.03125e-11	-3.8125e-11	-4.0625e-11	-4.34375e-11	-3.75e-11	-4.4375e-11	-3.96875e-11	-3.84375e-11	-3.53125e-11	-3.5e-11	-3.34375e-11
-7.21875e-11	-6.84375e-11	-6.59375e-11	-6.59375e-11	-6.03125e-11	-6.6875e-11	-5.25e-11	-6.28125e-11	-6.25e-11	-6.375e-11	-6.03125e-11	-6.34375e-11	-5.53125e-11		-4.4375e-11	-4.5625e-11	-4.125e-11	-4.28125e-11	-3.6875e-11	-4.375e-11	-4.1875e-11	-4.34375e-11	-3.71875e-11	-3.84375e-11	-3.6875e-11	-3.5e-11	-3.53125e-11
-7.4375e-11	-6.75e-11	-6.71875e-11	-6.34375e-11	-5.1875e-11	-6.25e-11	-5.84375e-11	-6.28125e-11	-6.1875e-11	-5.90625e-11	-5.03125e-11	-6.09375e-11	-5.28125e-11		-4.15625e-11	-4.03125e-11	-4.5625e-11	-4.46875e-11	-4.15625e-11	-4.28125e-11	-4.3125e-11	-4.0625e-11	-3.8125e-11	-3.75e-11	-3.5625e-11	-4.15625e-11	-3.84375e-11
-7.75e-11	-7.0625e-11	-6.65625e-11	-6.3125e-11	-5.28125e-11	-6.46875e-11	-5.71875e-11	-6.53125e-11	-6.65625e-11	-6.5e-11	-5.96875e-11	-6.1875e-11	-6.21875e-11		-4.46875e-11	-4e-11	-4.03125e-11	-4.1875e-11	-4.3125e-11	-4.1875e-11	-4.1875e-11	-4.25e-11	-3.71875e-11	-4.375e-11	-3.65625e-11	-4.34375e-11	-3.53125e-11
-7.53125e-11	-6.84375e-11	-6.71875e-11	-5.46875e-11	-5.28125e-11	-5.53125e-11	-5.28125e-11	-6.9375e-11	-6e-11	-5.21875e-11	-6.375e-11	-5.9375e-11	-5.96875e-11		-4.1875e-11	-4.28125e-11	-3.5e-11	-4.34375e-11	-4.15625e-11	-4.34375e-11	-3.90625e-11	-4.4375e-11	-3.46875e-11	-4.4375e-11	-3.9375e-11	-3.5625e-11	-3.6875e-11
-8.34375e-11	-6.71875e-11	-6.625e-11	-5.625e-11	-6.28125e-11	-6.53125e-11	-5.4375e-11	-5.5625e-11	-6.4375e-11	-6.84375e-11	-6.40625e-11	-6.21875e-11	-6.09375e-11		-4.25e-11	-4.34375e-11	-4.34375e-11	-4.125e-11	-3.75e-11	-4.15625e-11	-3.90625e-11	-3.9375e-11	-3.78125e-11	-4.03125e-11	-4.03125e-11	-3.34375e-11	-3.71875e-11
-7.6875e-11	-7.03125e-11	-7.59375e-11	-5.5625e-11	-5.09375e-11	-6.21875e-11	-5.3125e-11	-5.75e-11	-6.6875e-11	-6.21875e-11	-5.40625e-11	-6.46875e-11	-5.84375e-11		-4.40625e-11	-3.84375e-11	-4.8125e-11	-4.1875e-11	-4.09375e-11	-3.875e-11	-4.375e-11	-4.125e-11	-4.1875e-11	-4.28125e-11	-4.1875e-11	-3.09375e-11	-3.78125e-11
-7.625e-11	-6.84375e-11	-6.75e-11	-6.03125e-11	-5.125e-11	-6.15625e-11	-5.75e-11	-6.0625e-11	-6.78125e-11	-5.78125e-11	-6.21875e-11	-5.96875e-11	-6.1875e-11		-4.40625e-11	-4.375e-11	-4.40625e-11	-4.03125e-11	-4.4375e-11	-4.4375e-11	-4.46875e-11	-4.21875e-11	-4.15625e-11	-3.59375e-11	-4.09375e-11	-3.46875e-11	-3.59375e-11
-8.09375e-11	-6.34375e-11	-7.1875e-11	-5.96875e-11	-5.65625e-11	-6.40625e-11	-5.84375e-11	-6.71875e-11	-7.15625e-11	-5.65625e-11	-5.84375e-11	-6.90625e-11	-5.96875e-11		-4.25e-11	-4.5e-11	-4.375e-11	-3.71875e-11	-4.25e-11	-3.65625e-11	-4.65625e-11	-3.78125e-11	-4.15625e-11	-3.84375e-11	-3.59375e-11	-4e-11	-3.53125e-11
-6.8125e-11	-6.71875e-11	-6.84375e-11	-5.8125e-11	-5.59375e-11	-6.375e-11	-5.59375e-11	-6.15625e-11	-6.15625e-11	-6.03125e-11	-5.8125e-11	-6.125e-11	-5.5625e-11		-4.8125e-11	-4.28125e-11	-4.53125e-11	-4.28125e-11	-4.46875e-11	-3.40625e-11	-4.03125e-11	-4.5e-11	-4.03125e-11	-3.84375e-11	-4.03125e-11	-4.15625e-11	-3.96875e-11
-7.875e-11	-6.34375e-11	-6.71875e-11	-6.40625e-11	-5.65625e-11	-6.1875e-11	-5.34375e-11	-6.5e-11	-6.40625e-11	-5.875e-11	-6.5e-11	-5.625e-11	-5.59375e-11		-4.375e-11	-4.21875e-11	-4.6875e-11	-4.03125e-11	-4.34375e-11	-4.0625e-11	-4.125e-11	-4.65625e-11	-4.5e-11	-3.65625e-11	-4.03125e-11	-3.84375e-11	-3.96875e-11
-7.875e-11	-7.40625e-11	-7.28125e-11	-5.9375e-11	-6.1875e-11	-6.34375e-11	-6.5e-11	-6.28125e-11	-5.5e-11	-6.46875e-11	-6.0625e-11	-6.75e-11	-5.15625e-11		-4.28125e-11	-4.0625e-11	-4.3125e-11	-4.3125e-11	-3.78125e-11	-4.34375e-11	-4.09375e-11	-4.375e-11	-4.15625e-11	-4.09375e-11	-3.90625e-11	-4.03125e-11	-4.03125e-11
-7.40625e-11	-6.90625e-11	-7.03125e-11	-6.09375e-11	-5.59375e-11	-6.09375e-11	-5.3125e-11	-5.84375e-11	-6.34375e-11	-6.125e-11	-6.03125e-11	-6.625e-11	-5.53125e-11		-4.15625e-11	-4.46875e-11	-3.96875e-11	-4.28125e-11	-3.625e-11	-3.90625e-11	-4.4375e-11	-4.5625e-11	-3.15625e-11	-3.15625e-11	-3.75e-11	-4.03125e-11	-3.90625e-11
-7.5625e-11	-6.8125e-11	-7.1875e-11	-5.71875e-11	-5.40625e-11	-6.09375e-11	-5.6875e-11	-6.4375e-11	-6.0625e-11	-6.5e-11	-5.84375e-11	-6.78125e-11	-6.46875e-11		-4.1875e-11	-4e-11	-3.90625e-11	-4.34375e-11	-4.09375e-11	-3.96875e-11	-4.53125e-11	-3.78125e-11	-3.375e-11	-3.53125e-11	-4.1875e-11	-3.78125e-11	-3.84375e-11
-8.59375e-11	-7.03125e-11	-6.8125e-11	-6.09375e-11	-5.96875e-11	-6.28125e-11	-5.96875e-11	-6.46875e-11	-6.6875e-11	-5.6875e-11	-6.3125e-11	-6.96875e-11	-5.71875e-11		-4.5e-11	-3.8125e-11	-4.03125e-11	-4.28125e-11	-4.53125e-11	-4.78125e-11	-4e-11	-3.5e-11	-3.65625e-11	-3.8125e-11	-3.65625e-11	-2.84375e-11	-3.90625e-11
-7.65625e-11	-6.4375e-11	-6.59375e-11	-6.09375e-11	-5.65625e-11	-6.1875e-11	-5.5e-11	-5.25e-11	-6.03125e-11	-6.34375e-11	-5.53125e-11	-6.84375e-11	-5.96875e-11		-4.09375e-11	-4.34375e-11	-4.03125e-11	-4.46875e-11	-4.09375e-11	-4.28125e-11	-3.96875e-11	-4.0625e-11	-4.15625e-11	-3.625e-11	-4.34375e-11	-3.15625e-11	-3.96875e-11
-7.5e-11	-6.78125e-11	-7.46875e-11	-6.53125e-11	-6.0625e-11	-6.25e-11	-5.125e-11	-6.15625e-11	-6.34375e-11	-6.34375e-11	-5.90625e-11	-6.90625e-11	-5.46875e-11		-4.03125e-11	-4.53125e-11	-4.28125e-11	-4.15625e-11	-4.1875e-11	-4.15625e-11	-4.03125e-11	-4.3125e-11	-4.28125e-11	-3.75e-11	-4.09375e-11	-3.84375e-11	-4.5625e-11
-7.90625e-11	-7.125e-11	-6.71875e-11	-5.65625e-11	-5.65625e-11	-5.5625e-11	-5.21875e-11	-6.40625e-11	-6.78125e-11	-5.96875e-11	-6.40625e-11	-6.84375e-11	-5.78125e-11		-4.90625e-11	-4.1875e-11	-4.375e-11	-3.71875e-11	-4.40625e-11	-4.09375e-11	-4.15625e-11	-4.53125e-11	-4.0625e-11	-3.65625e-11	-3.90625e-11	-4.03125e-11	-4.21875e-11
-7.65625e-11	-7.34375e-11	-7.0625e-11	-5.5e-11	-6.09375e-11	-6.1875e-11	-5.34375e-11	-6.09375e-11	-6.46875e-11	-6.5e-11	-6.4375e-11	-5.96875e-11	-5.65625e-11		-4.46875e-11	-3.84375e-11	-4.53125e-11	-4.34375e-11	-4.0625e-11	-4.1875e-11	-4.40625e-11	-4.15625e-11	-3.84375e-11	-3.78125e-11	-4.125e-11	-3.71875e-11	-3.40625e-11
-8.25e-11	-7.125e-11	-6.75e-11	-6.5e-11	-6.09375e-11	-6.15625e-11	-5.625e-11	-6.15625e-11	-7.5e-11	-5.90625e-11	-6e-11	-6.46875e-11	-5.5e-11		-4.125e-11	-3.9375e-11	-4.5625e-11	-4.375e-11	-4.53125e-11	-3.96875e-11	-4.5625e-11	-4.03125e-11	-3.65625e-11	-3.90625e-11	-3.75e-11	-3.78125e-11	-3.4375e-11
-8.375e-11	-6.03125e-11	-6.5e-11	-5.9375e-11	-5.28125e-11	-6.5e-11	-5.71875e-11	-6.3125e-11	-5.5625e-11	-6.03125e-11	-5.65625e-11	-6.3125e-11	-5.96875e-11		-4.625e-11	-4.4375e-11	-4.40625e-11	-4.0625e-11	-3.90625e-11	-4.15625e-11	-4.1875e-11	-4.0625e-11	-3.75e-11	-3.625e-11	-3.5625e-11	-4.03125e-11	-3.875e-11
-8.09375e-11	-6.65625e-11	-6.84375e-11	-6.65625e-11	-5.4375e-11	-6.59375e-11	-6.125e-11	-6.40625e-11	-6.75e-11	-6.46875e-11	-6.34375e-11	-6.34375e-11	-6.21875e-11		-4.96875e-11	-4.59375e-11	-4.1875e-11	-3.96875e-11	-3.875e-11	-3.90625e-11	-3.75e-11	-3.90625e-11	-4.34375e-11	-3.53125e-11	-3.5e-11	-3.625e-11	-3.90625e-11
-8.59375e-11	-6.6875e-11	-6.84375e-11	-6e-11	-5.6875e-11	-5.46875e-11	-6.15625e-11	-6.5e-11	-6.3125e-11	-6.3125e-11	-6.59375e-11	-6.59375e-11	-5.21875e-11		-5.03125e-11	-3.65625e-11	-4.1875e-11	-4.09375e-11	-3.875e-11	-4.15625e-11	-3.78125e-11	-4.5e-11	-3.71875e-11	-3.96875e-11	-3.34375e-11	-3.40625e-11	-4.4375e-11
-7.65625e-11	-6.53125e-11	-6.6875e-11	-5.84375e-11	-5.40625e-11	-6.375e-11	-5.40625e-11	-6.21875e-11	-6.8125e-11	-6.21875e-11	-6.0625e-11	-7.34375e-11	-5.34375e-11		-4.15625e-11	-4.09375e-11	-4.5e-11	-4.15625e-11	-4.125e-11	-4.15625e-11	-4.21875e-11	-4.84375e-11	-4.09375e-11	-4.25e-11	-3.5e-11	-3.5e-11	-3.875e-11
-7.5625e-11	-6.53125e-11	-7e-11	-6e-11	-6.1875e-11	-6.53125e-11	-5.34375e-11	-6.25e-11	-6.65625e-11	-5.96875e-11	-6.3125e-11	-5.8125e-11	-6.09375e-11		-3.84375e-11	-4.3125e-11	-4.46875e-11	-3.96875e-11	-4.15625e-11	-4.125e-11	-4.65625e-11	-4.5e-11	-4.28125e-11	-4.25e-11	-3.78125e-11	-3.75e-11	-3.5625e-11
-7.65625e-11	-6.5e-11	-6.0625e-11	-6.125e-11	-5.59375e-11	-6e-11	-5.1875e-11	-5.96875e-11	-6.125e-11	-5.5625e-11	-6.25e-11	-6.5e-11	-6e-11		-4.3125e-11	-4.34375e-11	-4.46875e-11	-3.90625e-11	-3.375e-11	-4.09375e-11	-4.40625e-11	-4.71875e-11	-3.90625e-11	-4.03125e-11	-4.03125e-11	-4.03125e-11	-3.75e-11
-7.25e-11	-7.03125e-11	-6.6875e-11	-6.5625e-11	-5.6875e-11	-6.65625e-11	-5.3125e-11	-6.5e-11	-5.75e-11	-5.40625e-11	-6.28125e-11	-5.8125e-11	-6.03125e-11		-4.46875e-11	-4.75e-11	-4.28125e-11	-3.8125e-11	-3.28125e-11	-3.6875e-11	-4.0625e-11	-4.3125e-11	-3.4375e-11	-4.09375e-11	-4.03125e-11	-3.9375e-11	-3.53125e-11
-7.75e-11	-7.15625e-11	-6.3125e-11	-6e-11	-5.34375e-11	-6.4375e-11	-5.65625e-11	-6.03125e-11	-6.53125e-11	-6.625e-11	-5.96875e-11	-6.15625e-11	-5.375e-11		-4.59375e-11	-4.28125e-11	-4.65625e-11	-4.0625e-11	-4.28125e-11	-3.65625e-11	-4.34375e-11	-3.9375e-11	-3.875e-11	-3.75e-11	-3.59375e-11	-3.53125e-11	-3.9375e-11
-7.65625e-11	-6.6875e-11	-6.875e-11	-6.34375e-11	-6e-11	-5.9375e-11	-5.21875e-11	-5.40625e-11	-6.0625e-11	-6.21875e-11	-6.34375e-11	-5.875e-11	-6.25e-11		-4.5625e-11	-4.28125e-11	-4.28125e-11	-4e-11	-4.375e-11	-4.21875e-11	-4.09375e-11	-3.78125e-11	-4.21875e-11	-3.9375e-11	-3.4375e-11	-4e-11	-4.53125e-11
-7.90625e-11	-6.3125e-11	-6.96875e-11	-6.03125e-11	-5.625e-11	-6.46875e-11	-5.4375e-11	-6.375e-11	-6.625e-11	-5.875e-11	-5.90625e-11	-6.15625e-11	-5.5e-11		-4.625e-11	-4.71875e-11	-4.78125e-11	-3.78125e-11	-4.375e-11	-4.65625e-11	-4.125e-11	-4.03125e-11	-3.8125e-11	-4.03125e-11	-4.09375e-11	-3.625e-11	-3.65625e-11
-7.78125e-11	-6.3125e-11	-7.03125e-11	-5.8125e-11	-6.03125e-11	-6.1875e-11	-5.5625e-11	-5.46875e-11	-6.09375e-11	-6.1875e-11	-6.15625e-11	-6.34375e-11	-5.21875e-11		-4.40625e-11	-4.34375e-11	-4.28125e-11	-4.03125e-11	-3.8125e-11	-4.53125e-11	-4.21875e-11	-3.78125e-11	-3.84375e-11	-3.78125e-11	-4.3125e-11	-3.96875e-11	-3.1875e-11
-7.3125e-11	-7.375e-11	-6.5e-11	-6.53125e-11	-5.59375e-11	-5.5e-11	-5.53125e-11	-5.3125e-11	-6.3125e-11	-6.65625e-11	-6.4375e-11	-6.53125e-11	-5.84375e-11		-4.1875e-11	-4.40625e-11	-3.90625e-11	-4.1875e-11	-4.21875e-11	-4.34375e-11	-3.9375e-11	-3.90625e-11	-3.5e-11	-4.375e-11	-4.4375e-11	-3.625e-11	-3.4375e-11
-7.34375e-11	-6.4375e-11	-6.34375e-11	-5.90625e-11	-6.3125e-11	-5.65625e-11	-5.28125e-11	-6.09375e-11	-6.5e-11	-5.9375e-11	-5.90625e-11	-6.03125e-11	-6.09375e-11		-4.65625e-11	-4.21875e-11	-4.8125e-11	-4.53125e-11	-4.59375e-11	-4.125e-11	-4.40625e-11	-4.34375e-11	-3.15625e-11	-4.03125e-11	-3.90625e-11	-3.71875e-11	-3.4375e-11
-8.03125e-11	-6.625e-11	-6.96875e-11	-6.4375e-11	-5.6875e-11	-6.21875e-11	-5.46875e-11	-5.53125e-11	-6.4375e-11	-6.3125e-11	-6.09375e-11	-6.53125e-11	-5.5e-11		-4.09375e-11	-3.78125e-11	-4.8125e-11	-3.8125e-11	-4.25e-11	-4.0625e-11	-4.46875e-11	-4.09375e-11	-3.5e-11	-3.90625e-11	-3.75e-11	-4.03125e-11	-3.9375e-11
-8.03125e-11	-5.875e-11	-6.90625e-11	-6.1875e-11	-5.875e-11	-6.03125e-11	-5.9375e-11	-5.84375e-11	-6.25e-11	-6.15625e-11	-6.375e-11	-6.0625e-11	-5.4375e-11		-4.28125e-11	-4.53125e-11	-4.1875e-11	-3.71875e-11	-3.3125e-11	-4.03125e-11	-3.6875e-11	-5.0625e-11	-3.96875e-11	-3.8125e-11	-3.59375e-11	-3.875e-11	-4.03125e-11
-7.9375e-11	-6.46875e-11	-6.5625e-11	-5.4375e-11	-5.6875e-11	-6.625e-11	-5.1875e-11	-6.46875e-11	-6.03125e-11	-6.21875e-11	-5.9375e-11	-6.21875e-11	-4.96875e-11		-4.6875e-11	-4.9375e-11	-3.90625e-11	-3.6875e-11	-3.5e-11	-3.78125e-11	-4.03125e-11	-4.96875e-11	-3.90625e-11	-3.59375e-11	-3.75e-11	-4.1875e-11	-3.84375e-11
-7.9375e-11	-6.875e-11	-6.84375e-11	-6.46875e-11	-5.46875e-11	-6.28125e-11	-5.78125e-11	-5.9375e-11	-6.1875e-11	-5.96875e-11	-6.40625e-11	-6.34375e-11	-6.21875e-11		-4.3125e-11	-4.15625e-11	-3.96875e-11	-4.09375e-11	-4.03125e-11	-3.5e-11	-4.1875e-11	-4.15625e-11	-4.28125e-11	-3.40625e-11	-3.84375e-11	-4.125e-11	-4.25e-11
-7.875e-11	-6.28125e-11	-6.875e-11	-6.53125e-11	-6.34375e-11	-5.84375e-11	-5.375e-11	-6.03125e-11	-5.84375e-11	-6.78125e-11	-5.90625e-11	-6.375e-11	-5.3125e-11		-4.375e-11	-4.0625e-11	-4.28125e-11	-4.28125e-11	-4.46875e-11	-3.65625e-11	-3.78125e-11	-4.34375e-11	-4.125e-11	-3e-11	-3.4375e-11	-3.96875e-11	-3.4375e-11
-7.28125e-11	-6.6875e-11	-7.15625e-11	-6.625e-11	-5.53125e-11	-5.78125e-11	-5.71875e-11	-6.09375e-11	-6.6875e-11	-5.875e-11	-5.9375e-11	-6.28125e-11	-6.03125e-11		-4.625e-11	-3.9375e-11	-4.15625e-11	-4.375e-11	-4.4375e-11	-4.03125e-11	-3.84375e-11	-4.09375e-11	-4.21875e-11	-3.375e-11	-4.25e-11	-3.53125e-11	-3.5625e-11
-7.5e-11	-6.40625e-11	-6.75e-11	-6.25e-11	-5.78125e-11	-6.25e-11	-5.5e-11	-5.75e-11	-6.8125e-11	-5.78125e-11	-5.9375e-11	-6.53125e-11	-6.15625e-11		-4.15625e-11	-4.25e-11	-3.9375e-11	-4.03125e-11	-3.9375e-11	-4.03125e-11	-3.625e-11	-4.09375e-11	-4.03125e-11	-3.96875e-11	-4.28125e-11	-3.78125e-11	-3.75e-11
-8.15625e-11	-7e-11	-7.28125e-11	-6.5e-11	-4.90625e-11	-5.9375e-11	-5.65625e-11	-5.71875e-11	-5.875e-11	-5.5e-11	-6.40625e-11	-6.125e-11	-5.53125e-11		-4.21875e-11	-4.3125e-11	-4.03125e-11	-3.59375e-11	-4.3125e-11	-3.875e-11	-4.28125e-11	-4.25e-11	-3.875e-11	-4.34375e-11	-4.21875e-11	-3.875e-11	-4.28125e-11
-7.78125e-11	-7.53125e-11	-6.65625e-11	-6.1875e-11	-5.65625e-11	-6.09375e-11	-5.21875e-11	-5.53125e-11	-6.28125e-11	-6.125e-11	-6.25e-11	-6.46875e-11	-5.8125e-11		-4.15625e-11	-4.40625e-11	-4.28125e-11	-4.09375e-11	-4.34375e-11	-4.0625e-11	-4.53125e-11	-4.25e-11	-3.8125e-11	-4.125e-11	-4.1875e-11	-3.28125e-11	-3.875e-11
-7.59375e-11	-6.71875e-11	-7.1875e-11	-6.28125e-11	-5.9375e-11	-6.3125e-11	-4.5e-11	-5.84375e-11	-6e-11	-6.6875e-11	-6.15625e-11	-6.59375e-11	-5.1875e-11		-3.75e-11	-3.84375e-11	-4.5625e-11	-4.75e-11	-4.21875e-11	-4.28125e-11	-3.96875e-11	-4.125e-11	-3.8125e-11	-3.65625e-11	-4.15625e-11	-3.09375e-11	-3.65625e-11
-7.78125e-11	-6e-11	-6.46875e-11	-6.75e-11	-6.53125e-11	-6.09375e-11	-5e-11	-6.125e-11	-6.03125e-11	-5.875e-11	-5.8125e-11	-5.5625e-11	-5.0625e-11		-3.9375e-11	-3.71875e-11	-4.5e-11	-4.21875e-11	-4.15625e-11	-4.25e-11	-3.78125e-11	-4.4375e-11	-3.5e-11	-4.09375e-11	-3.96875e-11	-3.59375e-11	-3.96875e-11
-7.34375e-11	-6.15625e-11	-6.5e-11	-5.71875e-11	-5.78125e-11	-5.84375e-11	-5.8125e-11	-5.46875e-11	-6.3125e-11	-6.28125e-11	-5.53125e-11	-6.5e-11	-5.84375e-11		-4.5625e-11	-4.375e-11	-4.375e-11	-4.25e-11	-4.25e-11	-4.46875e-11	-3.96875e-11	-4.34375e-11	-3.78125e-11	-3.8125e-11	-4.1875e-11	-3.9375e-11	-3.65625e-11
-7.71875e-11	-5.84375e-11	-6.5e-11	-6.9375e-11	-6.15625e-11	-6.3125e-11	-5.5e-11	-6.1875e-11	-6.15625e-11	-6.75e-11	-5.53125e-11	-6.78125e-11	-5.65625e-11		-3.84375e-11	-4.59375e-11	-4.09375e-11	-4.3125e-11	-4.5e-11	-4.0625e-11	-3.6875e-11	-4.03125e-11	-4.1875e-11	-4.09375e-11	-4.03125e-11	-3.65625e-11	-3.5e-11
-7.5625e-11	-6.1875e-11	-7.03125e-11	-5.75e-11	-5.875e-11	-5.65625e-11	-5.125e-11	-6.40625e-11	-6.71875e-11	-6.1875e-11	-6.5625e-11	-6.1875e-11	-5.03125e-11		-3.90625e-11	-4.53125e-11	-4.03125e-11	-4.03125e-11	-4.1875e-11	-4.0625e-11	-3.71875e-11	-4.375e-11	-4.46875e-11	-3.71875e-11	-3.65625e-11	-4.03125e-11	-3.6875e-11
-7.46875e-11	-5.90625e-11	-6.90625e-11	-6e-11	-6.03125e-11	-6.90625e-11	-6.125e-11	-6.09375e-11	-7.125e-11	-5.90625e-11	-5.96875e-11	-6.59375e-11	-5.25e-11		-4.125e-11	-4.375e-11	-4.4375e-11	-4.25e-11	-4.09375e-11	-4.5e-11	-4.3125e-11	-4.03125e-11	-4.625e-11	-3.8125e-11	-3.5e-11	-3.5e-11	-3.875e-11
-7.375e-11	-6.1875e-11	-7.15625e-11	-6.125e-11	-6.21875e-11	-5.6875e-11	-5e-11	-5.71875e-11	-6.59375e-11	-5.46875e-11	-5.84375e-11	-6.21875e-11	-5.78125e-11		-4.03125e-11	-3.96875e-11	-4.65625e-11	-3.65625e-11	-4.6875e-11	-3.75e-11	-4.46875e-11	-4.21875e-11	-4.09375e-11	-4.03125e-11	-3.9375e-11	-3.6875e-11	-3.40625e-11
-7.4375e-11	-6.53125e-11	-7.28125e-11	-6.15625e-11	-5.625e-11	-6.3125e-11	-5.59375e-11	-6.375e-11	-6.28125e-11	-6.25e-11	-6.125e-11	-6.34375e-11	-5.5e-11		-4.1875e-11	-3.78125e-11	-4.0625e-11	-3.9375e-11	-4.5e-11	-3.65625e-11	-4.3125e-11	-4.28125e-11	-4.28125e-11	-3.5625e-11	-3.84375e-11	-3.71875e-11	-3.5e-11
-7.21875e-11	-5.9375e-11	-6.90625e-11	-6.46875e-11	-5.5625e-11	-6.3125e-11	-5.5e-11	-5.78125e-11	-7.03125e-11	-5.6875e-11	-6.125e-11	-6.28125e-11	-5.90625e-11		-4.59375e-11	-4.78125e-11	-3.90625e-11	-4.53125e-11	-3.84375e-11	-4.15625e-11	-4.21875e-11	-4.03125e-11	-4.25e-11	-3.71875e-11	-4.03125e-11	-3.84375e-11	-4.28125e-11
-7.84375e-11	-5.75e-11	-6.78125e-11	-5.84375e-11	-5.53125e-11	-6.125e-11	-5.90625e-11	-5.90625e-11	-6.6875e-11	-6.5e-11	-5.96875e-11	-6.15625e-11	-6.1875e-11		-5.03125e-11	-4.5e-11	-4.28125e-11	-3.90625e-11	-3.9375e-11	-4.40625e-11	-3.8125e-11	-4.34375e-11	-3.8125e-11	-3.40625e-11	-3.90625e-11	-3.75e-11	-4.125e-11
-7.625e-11	-6.1875e-11	-6.96875e-11	-5.84375e-11	-6.15625e-11	-6.1875e-11	-5.3125e-11	-6.09375e-11	-6.78125e-11	-5.40625e-11	-5.34375e-11	-5.71875e-11	-5.375e-11		-4.40625e-11	-3.78125e-11	-4.65625e-11	-4.03125e-11	-3.875e-11	-3.96875e-11	-3.875e-11	-4.5e-11	-4.3125e-11	-3.3125e-11	-3.84375e-11	-3.3125e-11	-3.625e-11
-7.40625e-11	-6.40625e-11	-6.75e-11	-5.5e-11	-6.28125e-11	-5.875e-11	-6.375e-11	-6.09375e-11	-6.6875e-11	-5.375e-11	-6.21875e-11	-6.15625e-11	-5.78125e-11		-4.125e-11	-4.90625e-11	-4.0625e-11	-4.28125e-11	-3.8125e-11	-3.9375e-11	-3.875e-11	-4.125e-11	-4.5e-11	-4.09375e-11	-3.8125e-11	-4.21875e-11	-3.625e-11
-7.3125e-11	-5.84375e-11	-6.4375e-11	-6.40625e-11	-5.84375e-11	-6.375e-11	-5.5625e-11	-6.21875e-11	-6.03125e-11	-5.78125e-11	-6.09375e-11	-6e-11	-5.5e-11		-4.25e-11	-4.5e-11	-4.15625e-11	-4.375e-11	-4.8125e-11	-4e-11	-3.84375e-11	-4.03125e-11	-4.0625e-11	-4.125e-11	-3.8125e-11	-4.34375e-11	-3.71875e-11
-7.65625e-11	-6.875e-11	-6.96875e-11	-5.90625e-11	-5.875e-11	-6.5e-11	-5.28125e-11	-6.4375e-11	-6.46875e-11	-5.8125e-11	-6.71875e-11	-6.53125e-11	-5.71875e-11		-4.1875e-11	-4.65625e-11	-4.59375e-11	-4.84375e-11	-3.90625e-11	-4.0625e-11	-3.90625e-11	-4.65625e-11	-4.09375e-11	-4e-11	-3.5e-11	-4.28125e-11	-3.8125e-11
-7.84375e-11	-6.03125e-11	-6.9375e-11	-5.84375e-11	-5.90625e-11	-5.65625e-11	-5.8125e-11	-6.125e-11	-6.4375e-11	-6.03125e-11	-5.46875e-11	-6.46875e-11	-5.5e-11		-4.53125e-11	-4.0625e-11	-4.71875e-11	-4.25e-11	-3.9375e-11	-4.15625e-11	-3.875e-11	-4.65625e-11	-3.75e-11	-4.15625e-11	-3.59375e-11	-4.03125e-11	-3.84375e-11
-7.78125e-11	-5.78125e-11	-6.5625e-11	-6.0625e-11	-5.59375e-11	-6.5e-11	-5.125e-11	-6.28125e-11	-6.0625e-11	-6.71875e-11	-5.8125e-11	-6.4375e-11	-5.4375e-11		-4.4375e-11	-4.46875e-11	-4.375e-11	-3.78125e-11	-4.09375e-11	-4.1875e-11	-3.84375e-11	-4.53125e-11	-3e-11	-3.8125e-11	-3.625e-11	-4.125e-11	-3.875e-11
-7.21875e-11	-6.28125e-11	-7.1875e-11	-6.65625e-11	-6.15625e-11	-6.4375e-11	-5.65625e-11	-6.3125e-11	-5.71875e-11	-6.4375e-11	-6.5e-11	-6.34375e-11	-5.28125e-11		-3.8125e-11	-4.53125e-11	-4.5625e-11	-4.28125e-11	-3.84375e-11	-3.84375e-11	-4.03125e-11	-5.09375e-11	-3.65625e-11	-3.65625e-11	-3.71875e-11	-3.875e-11	-4.375e-11
-7.53125e-11	-6.71875e-11	-6.71875e-11	-6.1875e-11	-5.625e-11	-5.875e-11	-5.75e-11	-6.84375e-11	-6.90625e-11	-6.28125e-11	-5.46875e-11	-6.78125e-11	-6.15625e-11		-4.28125e-11	-4.5e-11	-4.46875e-11	-4.03125e-11	-3.71875e-11	-3.59375e-11	-4.21875e-11	-5.0625e-11	-3.71875e-11	-4.15625e-11	-4.25e-11	-3.3125e-11	-4.21875e-11
-7.375e-11	-6.875e-11	-6.1875e-11	-6.40625e-11	-5.8125e-11	-6.75e-11	-5.71875e-11	-6.15625e-11	-6.53125e-11	-6.5e-11	-6.03125e-11	-6.28125e-11	-5.9375e-11		-4.3125e-11	-4.53125e-11	-3.78125e-11	-4.09375e-11	-4.40625e-11	-4.53125e-11	-4.1875e-11	-4.5e-11	-3.625e-11	-4.34375e-11	-4.1875e-11	-3.375e-11	-4.03125e-11
-7.09375e-11	-6.4375e-11	-6.6875e-11	-6.0625e-11	-5.59375e-11	-6.5625e-11	-5.9375e-11	-6.25e-11	-6.15625e-11	-6.03125e-11	-6.28125e-11	-6.375e-11	-6.65625e-11		-4.21875e-11	-4.09375e-11	-3.25e-11	-4.03125e-11	-4.21875e-11	-4.0625e-11	-4.53125e-11	-3.8125e-11	-4.15625e-11	-4.03125e-11	-4.5e-11	-3.78125e-11	-3.28125e-11
-7.21875e-11	-5.65625e-11	-6.40625e-11	-7.09375e-11	-5.65625e-11	-6.96875e-11	-5.15625e-11	-6.28125e-11	-6.96875e-11	-6.1875e-11	-6.0625e-11	-6.78125e-11	-5.8125e-11		-4.96875e-11	-4.15625e-11	-3.84375e-11	-3.65625e-11	-3.75e-11	-3.40625e-11	-4.03125e-11	-4.15625e-11	-4.15625e-11	-3.375e-11	-4.3125e-11	-3.5e-11	-3.28125e-11
-7.71875e-11	-5.71875e-11	-6.65625e-11	-6.3125e-11	-5.71875e-11	-6.21875e-11	-5.84375e-11	-6.34375e-11	-5.65625e-11	-6.34375e-11	-5.84375e-11	-6.59375e-11	-5.46875e-11		-4.46875e-11	-4.15625e-11	-3.78125e-11	-3.90625e-11	-4.03125e-11	-3.34375e-11	-4.28125e-11	-4.3125e-11	-3.8125e-11	-3.59375e-11	-4.0625e-11	-3.53125e-11	-4.09375e-11
-7.96875e-11	-6.40625e-11	-6.9375e-11	-6.21875e-11	-6.0625e-11	-6.28125e-11	-5.625e-11	-6.65625e-11	-6.03125e-11	-6.21875e-11	-6.46875e-11	-7.15625e-11	-5.6875e-11		-4.21875e-11	-4.53125e-11	-3.65625e-11	-4.34375e-11	-4.34375e-11	-4.40625e-11	-4.46875e-11	-4.09375e-11	-4.03125e-11	-4.03125e-11	-3.5e-11	-4e-11	-3.6875e-11
-7.15625e-11	-6.78125e-11	-6.4375e-11	-6.4375e-11	-5.0625e-11	-6e-11	-5.5e-11	-6.53125e-11	-6.3125e-11	-6.5e-11	-5.65625e-11	-6.6875e-11	-5.15625e-11		-4.40625e-11	-4.1875e-11	-3.90625e-11	-4.15625e-11	-4.34375e-11	-4.5e-11	-4.40625e-11	-4.4375e-11	-4.21875e-11	-4.21875e-11	-3.875e-11	-4.1875e-11	-4.03125e-11
-7.5e-11	-6.6875e-11	-7.0625e-11	-5.84375e-11	-5.53125e-11	-5.3125e-11	-5.28125e-11	-6.28125e-11	-6.53125e-11	-5.5625e-11	-5.90625e-11	-6.59375e-11	-5.25e-11		-4.4375e-11	-4.3125e-11	-4.46875e-11	-4.03125e-11	-4.78125e-11	-4.59375e-11	-3.75e-11	-4.15625e-11	-4.46875e-11	-3.90625e-11	-4.25e-11	-3.96875e-11	-3.84375e-11
-7.84375e-11	-5.9375e-11	-6.46875e-11	-6.375e-11	-5.375e-11	-6.9375e-11	-5.84375e-11	-6.53125e-11	-6.0625e-11	-6.15625e-11	-5.53125e-11	-6.4375e-11	-5.78125e-11		-4.5e-11	-4.53125e-11	-4.875e-11	-4.21875e-11	-4.96875e-11	-4.03125e-11	-4e-11	-4.1875e-11	-4.75e-11	-3.28125e-11	-3.6875e-11	-3.875e-11	-3.40625e-11
-7.5625e-11	-7.15625e-11	-6.71875e-11	-6.1875e-11	-6.40625e-11	-6.375e-11	-5.59375e-11	-6.15625e-11	-6.375e-11	-6.53125e-11	-6.09375e-11	-6.65625e-11	-6e-11		-4.46875e-11	-4.40625e-11	-4.46875e-11	-4.5625e-11	-4.34375e-11	-3.75e-11	-4.03125e-11	-4.5e-11	-4.625e-11	-3.46875e-11	-3.40625e-11	-3.65625e-11	-3.5625e-11
-7.53125e-11	-6.59375e-11	-6.8125e-11	-5.59375e-11	-5.375e-11	-5.8125e-11	-4.90625e-11	-6.5e-11	-6.0625e-11	-6.03125e-11	-6.15625e-11	-6.625e-11	-6.375e-11		-4.4375e-11	-4.375e-11	-4.40625e-11	-3.78125e-11	-4.40625e-11	-3.625e-11	-3.8125e-11	-4.09375e-11	-3.84375e-11	-4.03125e-11	-4.0625e-11	-3.65625e-11	-3.9375e-11
-8.0625e-11	-7.3125e-11	-7.21875e-11	-5.90625e-11	-5.8125e-11	-6.65625e-11	-5.5e-11	-6.375e-11	-5.84375e-11	-6.65625e-11	-5.75e-11	-6.65625e-11	-5.96875e-11		-4.03125e-11	-4.46875e-11	-4.125e-11	-4.1875e-11	-4.09375e-11	-4.1875e-11	-4.375e-11	-4.15625e-11	-4.125e-11	-3.96875e-11	-3.96875e-11	-3.46875e-11	-3.59375e-11
-7.5e-11	-6.59375e-11	-6.9375e-11	-6e-11	-5e-11	-5.9375e-11	-5.4375e-11	-6.375e-11	-6.34375e-11	-6.125e-11	-5.65625e-11	-5.9375e-11	-6.34375e-11		-4.25e-11	-4.46875e-11	-4.4375e-11	-4.03125e-11	-4.15625e-11	-3.53125e-11	-3.9375e-11	-4.40625e-11	-3.78125e-11	-3.9375e-11	-4.03125e-11	-3.59375e-11	-3.375e-11
-7.28125e-11	-7.09375e-11	-6.28125e-11	-5.9375e-11	-5.4375e-11	-5.3125e-11	-5.53125e-11	-6e-11	-6.15625e-11	-6.875e-11	-5.875e-11	-6.3125e-11	-5.53125e-11		-4.34375e-11	-4.5e-11	-4.53125e-11	-3.84375e-11	-4.1875e-11	-4.03125e-11	-4.03125e-11	-4.65625e-11	-3.71875e-11	-3.8125e-11	-4.03125e-11	-3.78125e-11	-3.71875e-11
-7.40625e-11	-6.5e-11	-7.03125e-11	-6.15625e-11	-4.875e-11	-6.40625e-11	-5.03125e-11	-6.34375e-11	-6.21875e-11	-6.375e-11	-6.125e-11	-6.5e-11	-6.5e-11		-4.375e-11	-4.21875e-11	-4.71875e-11	-4.28125e-11	-4.25e-11	-4.03125e-11	-3.9375e-11	-4.28125e-11	-3.96875e-11	-3.5e-11	-3.90625e-11	-4.53125e-11	-4.59375e-11
-7.375e-11	-5.84375e-11	-7.3125e-11	-6.40625e-11	-5.03125e-11	-6.34375e-11	-5.84375e-11	-6.46875e-11	-6.4375e-11	-6.90625e-11	-5.4375e-11	-6.1875e-11	-5.625e-11		-4.5625e-11	-4.28125e-11	-4.59375e-11	-4.78125e-11	-4.03125e-11	-4.28125e-11	-3.90625e-11	-4.03125e-11	-3.875e-11	-3.875e-11	-3.78125e-11	-4.03125e-11	-4.03125e-11
-7.25e-11	-5.75e-11	-6.8125e-11	-6.5625e-11	-5.46875e-11	-6.375e-11	-5.6875e-11	-6.59375e-11	-6.15625e-11	-6.53125e-11	-6.34375e-11	-6.84375e-11	-5.59375e-11		-4.5625e-11	-4.34375e-11	-4.3125e-11	-4.34375e-11	-4.28125e-11	-4.21875e-11	-3.65625e-11	-4.25e-11	-3.4375e-11	-4.0625e-11	-4.03125e-11	-3.25e-11	-3.71875e-11
-7.25e-11	-7.03125e-11	-6.65625e-11	-5.625e-11	-5.40625e-11	-6.09375e-11	-5.6875e-11	-6.40625e-11	-6.96875e-11	-6.09375e-11	-6.46875e-11	-6.59375e-11	-5.53125e-11		-4.46875e-11	-4.375e-11	-4.40625e-11	-4.1875e-11	-4.15625e-11	-3.6875e-11	-3.90625e-11	-4.15625e-11	-4.03125e-11	-3.90625e-11	-3.90625e-11	-3.5e-11	-3.53125e-11
-7.21875e-11	-7.5e-11	-7.46875e-11	-6.40625e-11	-6e-11	-6.53125e-11	-5.71875e-11	-5.71875e-11	-6.28125e-11	-6.5e-11	-5.96875e-11	-6.1875e-11	-6.28125e-11		-3.9375e-11	-4.53125e-11	-4.03125e-11	-4.4375e-11	-4.21875e-11	-3.5e-11	-3.90625e-11	-3.8125e-11	-4.0625e-11	-3.625e-11	-3.59375e-11	-3.84375e-11	-4.09375e-11
-7.6875e-11	-6.6875e-11	-7.09375e-11	-5.90625e-11	-5.375e-11	-6e-11	-6.25e-11	-6.59375e-11	-7.21875e-11	-5.78125e-11	-6.3125e-11	-6.65625e-11	-5.875e-11		-4.28125e-11	-4.375e-11	-3.9375e-11	-3.6875e-11	-4.21875e-11	-3.46875e-11	-3.75e-11	-4.28125e-11	-3.75e-11	-3.4375e-11	-3.78125e-11	-3.875e-11	-4.03125e-11
-7.3125e-11	-6.25e-11	-7.21875e-11	-6.09375e-11	-4.90625e-11	-6.03125e-11	-5.78125e-11	-6.40625e-11	-7.15625e-11	-6.375e-11	-6.03125e-11	-6.46875e-11	-5.59375e-11		-4.28125e-11	-4.4375e-11	-4.09375e-11	-3.5625e-11	-4.21875e-11	-4.34375e-11	-4.03125e-11	-4.0625e-11	-4.3125e-11	-3.28125e-11	-3.84375e-11	-4.125e-11	-3.5e-11
-8.1875e-11	-6.5e-11	-7.15625e-11	-5.90625e-11	-5.625e-11	-6.15625e-11	-5.71875e-11	-6.03125e-11	-6.5e-11	-6.1875e-11	-6.0625e-11	-5.96875e-11	-5.5625e-11		-4.4375e-11	-4.40625e-11	-4.4375e-11	-4.03125e-11	-3.90625e-11	-4.15625e-11	-4.15625e-11	-4.0625e-11	-4.09375e-11	-3.21875e-11	-3.90625e-11	-3.875e-11	-3.6875e-11
-7.625e-11	-6.5e-11	-7.0625e-11	-5.875e-11	-5.46875e-11	-6.3125e-11	-5.34375e-11	-6.8125e-11	-5.84375e-11	-6e-11	-5.84375e-11	-7.15625e-11	-5.78125e-11		-4.6875e-11	-4.125e-11	-4.09375e-11	-3.875e-11	-4.15625e-11	-3.875e-11	-4.3125e-11	-4.28125e-11	-4.1875e-11	-3.96875e-11	-4.0625e-11	-4.21875e-11	-3.78125e-11
-7.78125e-11	-6.96875e-11	-7.34375e-11	-5.65625e-11	-5.03125e-11	-6.09375e-11	-5.65625e-11	-6.5625e-11	-6.34375e-11	-6.375e-11	-6.03125e-11	-6.21875e-11	-5.15625e-11		-4.5e-11	-4.59375e-11	-4.15625e-11	-3.625e-11	-4.1875e-11	-3.875e-11	-3.84375e-11	-4.125e-11	-3.65625e-11	-3.78125e-11	-3.8125e-11	-3.625e-11	-3.46875e-11
-7.65625e-11	-5.65625e-11	-6.90625e-11	-5.8125e-11	-5e-11	-5.6875e-11	-5.9375e-11	-6.28125e-11	-6.53125e-11	-6.15625e-11	-6.375e-11	-6.71875e-11	-6.28125e-11		-4.03125e-11	-4.3125e-11	-4.34375e-11	-4.03125e-11	-4.3125e-11	-3.9375e-11	-3.53125e-11	-4.125e-11	-4.1875e-11	-3.65625e-11	-3.65625e-11	-3.90625e-11	-3.875e-11
-7.90625e-11	-7.03125e-11	-6.53125e-11	-5.65625e-11	-5.78125e-11	-6.1875e-11	-5.78125e-11	-6.34375e-11	-5.96875e-11	-6.21875e-11	-6.1875e-11	-6.125e-11	-5.59375e-11		-4.4375e-11	-4.3125e-11	-3.6875e-11	-4.34375e-11	-4.28125e-11	-3.71875e-11	-3.90625e-11	-4.3125e-11	-4.03125e-11	-3.75e-11	-3.8125e-11	-3.8125e-11	-4.09375e-11
-7.3125e-11	-7.03125e-11	-6.65625e-11	-5.53125e-11	-5.5e-11	-6e-11	-5.21875e-11	-5.8125e-11	-6.15625e-11	-6.125e-11	-6.0625e-11	-6.59375e-11	-5.5625e-11		-4.3125e-11	-4.0625e-11	-3.78125e-11	-4.40625e-11	-4.4375e-11	-4.15625e-11	-3.6875e-11	-4.34375e-11	-3.46875e-11	-3.53125e-11	-3.625e-11	-4e-11	-4.09375e-11
-7.8125e-11	-6.15625e-11	-6.75e-11	-6.03125e-11	-5.0625e-11	-6.34375e-11	-6.15625e-11	-6.21875e-11	-6.03125e-11	-6e-11	-5.78125e-11	-6.78125e-11	-5.375e-11		-4.28125e-11	-4.34375e-11	-4.5625e-11	-4.15625e-11	-4.03125e-11	-4.375e-11	-3.53125e-11	-4.34375e-11	-3.71875e-11	-3.90625e-11	-3.96875e-11	-3.5625e-11	-4.125e-11
-7.15625e-11	-7.0625e-11	-6.21875e-11	-6.28125e-11	-5.6875e-11	-6.28125e-11	-5.40625e-11	-6.15625e-11	-6.25e-11	-5.84375e-11	-6.1875e-11	-6.875e-11	-5.6875e-11		-5.0625e-11	-4.53125e-11	-4.375e-11	-4.34375e-11	-4.40625e-11	-4.375e-11	-4.03125e-11	-4.15625e-11	-3.84375e-11	-4.28125e-11	-3.15625e-11	-3.5625e-11	-3.65625e-11
-6.65625e-11	-6.25e-11	-6.8125e-11	-6.09375e-11	-5.78125e-11	-6.5625e-11	-4.96875e-11	-7e-11	-6.6875e-11	-6.3125e-11	-5.40625e-11	-6.71875e-11	-5.9375e-11		-4.90625e-11	-4.40625e-11	-4.15625e-11	-4.6875e-11	-4.375e-11	-4.3125e-11	-3.8125e-11	-4.46875e-11	-4.03125e-11	-4.1875e-11	-3.6875e-11	-3.40625e-11	-3.78125e-11
-6.78125e-11	-5.28125e-11	-6.03125e-11	-5.40625e-11	-5.25e-11	-5.75e-11	-5.5625e-11	-6.6875e-11	-6e-11	-6.34375e-11	-6.4375e-11	-6.78125e-11	-5.84375e-11		-4.8125e-11	-4.1875e-11	-4.65625e-11	-4.53125e-11	-4.6875e-11	-4.34375e-11	-4e-11	-4.4375e-11	-4.03125e-11	-4.0625e-11	-3.8125e-11	-3.4375e-11	-4.09375e-11
-7.09375e-11	-6.65625e-11	-6.65625e-11	-6.09375e-11	-5.84375e-11	-6.34375e-11	-6.28125e-11	-6.1875e-11	-6.75e-11	-6.0625e-11	-5.875e-11	-6.5e-11	-5.8125e-11		-4.28125e-11	-4.65625e-11	-4.40625e-11	-4.28125e-11	-4.5625e-11	-4.4375e-11	-4.03125e-11	-4.46875e-11	-4.03125e-11	-3.59375e-11	-3.625e-11	-3.46875e-11	-4.21875e-11
-7.25e-11	-6.6875e-11	-6.46875e-11	-5.84375e-11	-5.90625e-11	-6.03125e-11	-5.40625e-11	-6.40625e-11	-6.40625e-11	-5.625e-11	-6.4375e-11	-6.625e-11	-5.34375e-11		-4.4375e-11	-4.59375e-11	-4.34375e-11	-4.125e-11	-4.15625e-11	-4.65625e-11	-4.0625e-11	-4.53125e-11	-4.125e-11	-3.5e-11	-3.59375e-11	-3.34375e-11	-3.9375e-11
-7.71875e-11	-6.21875e-11	-6.34375e-11	-6.03125e-11	-6.34375e-11	-6.03125e-11	-5.0625e-11	-6.46875e-11	-6.6875e-11	-5.78125e-11	-5.84375e-11	-6.28125e-11	-6.09375e-11		-4.03125e-11	-4.40625e-11	-4.34375e-11	-4.4375e-11	-4.59375e-11	-3.65625e-11	-4.1875e-11	-3.90625e-11	-4.09375e-11	-4.03125e-11	-3.65625e-11	-3.71875e-11	-3.78125e-11
-7.65625e-11	-6.53125e-11	-7e-11	-6.375e-11	-5.875e-11	-5.78125e-11	-5.84375e-11	-6.15625e-11	-5.53125e-11	-5.875e-11	-5.21875e-11	-6.15625e-11	-5.375e-11		-4.53125e-11	-4.59375e-11	-4.0625e-11	-3.90625e-11	-4.8125e-11	-4.03125e-11	-4.15625e-11	-4.40625e-11	-3.53125e-11	-4.5e-11	-4.15625e-11	-4.03125e-11	-3.15625e-11
-8.03125e-11	-6.1875e-11	-6.46875e-11	-5.8125e-11	-5.78125e-11	-6.4375e-11	-5.84375e-11	-5.96875e-11	-5.65625e-11	-5.71875e-11	-5.9375e-11	-6.1875e-11	-5.84375e-11		-4.375e-11	-4.34375e-11	-3.875e-11	-4.375e-11	-4.65625e-11	-4.5e-11	-4.46875e-11	-4.4375e-11	-4.03125e-11	-4.03125e-11	-4.15625e-11	-3.84375e-11	-3.46875e-11
-6.78125e-11	-6.78125e-11	-6.53125e-11	-6.1875e-11	-5.25e-11	-5.96875e-11	-5.8125e-11	-5.59375e-11	-5.84375e-11	-5.71875e-11	-6.5e-11	-6.40625e-11	-5.90625e-11		-4.40625e-11	-4.1875e-11	-4.03125e-11	-4.5e-11	-4.1875e-11	-4.875e-11	-3.78125e-11	-4.09375e-11	-4.03125e-11	-3.78125e-11	-3.65625e-11	-3.875e-11	-3.90625e-11
-7.78125e-11	-6.5e-11	-6.65625e-11	-6.03125e-11	-5e-11	-5.84375e-11	-6.25e-11	-6.3125e-11	-6.03125e-11	-5.78125e-11	-6.21875e-11	-6.59375e-11	-6.03125e-11		-4.34375e-11	-4.4375e-11	-4.25e-11	-4.15625e-11	-4.3125e-11	-4.53125e-11	-3.09375e-11	-4.0625e-11	-4.03125e-11	-3.90625e-11	-3.9375e-11	-3.78125e-11	-3.53125e-11
-7.53125e-11	-6.4375e-11	-6.6875e-11	-5.9375e-11	-4.53125e-11	-6.34375e-11	-6.09375e-11	-6.09375e-11	-5.84375e-11	-5.5625e-11	-6.15625e-11	-6.3125e-11	-6.09375e-11		-4.03125e-11	-4.75e-11	-4.3125e-11	-4.5e-11	-4.34375e-11	-4.3125e-11	-4.125e-11	-4.59375e-11	-4.03125e-11	-3.5625e-11	-3.46875e-11	-3.28125e-11	-3.65625e-11
-7.09375e-11	-6.46875e-11	-6.78125e-11	-5.53125e-11	-5.15625e-11	-6.3125e-11	-5.875e-11	-6.28125e-11	-5.90625e-11	-6.09375e-11	-6.53125e-11	-6.5e-11	-6e-11		-3.875e-11	-4.5e-11	-3.875e-11	-4.3125e-11	-3.875e-11	-3.3125e-11	-4.40625e-11	-4.875e-11	-4.15625e-11	-3.375e-11	-3.34375e-11	-3.25e-11	-3.84375e-11
-7.84375e-11	-6.5e-11	-6.9375e-11	-5.65625e-11	-5.53125e-11	-6.1875e-11	-5.1875e-11	-6.6875e-11	-6.65625e-11	-6.65625e-11	-5.5625e-11	-6.5e-11	-5.28125e-11		-4.21875e-11	-4.59375e-11	-3.59375e-11	-4.65625e-11	-4.21875e-11	-3.71875e-11	-3.875e-11	-4.5e-11	-4.03125e-11	-3.84375e-11	-3.84375e-11	-3.6875e-11	-3.84375e-11
-7.8125e-11	-6.28125e-11	-7.0625e-11	-6.15625e-11	-5.90625e-11	-5.9375e-11	-5.40625e-11	-5.78125e-11	-6.03125e-11	-5.84375e-11	-6.0625e-11	-7.1875e-11	-5.8125e-11		-4.09375e-11	-4.59375e-11	-3.4375e-11	-4.0625e-11	-4.40625e-11	-4.4375e-11	-3.71875e-11	-4.5e-11	-3.59375e-11	-3.78125e-11	-4.53125e-11	-3.8125e-11	-3.28125e-11
-7.8125e-11	-5.84375e-11	-7.15625e-11	-5.90625e-11	-4.875e-11	-5.90625e-11	-5.625e-11	-5.6875e-11	-5.875e-11	-6.40625e-11	-5.46875e-11	-5.78125e-11	-6.3125e-11		-4.03125e-11	-3.9375e-11	-4.03125e-11	-3.59375e-11	-4.1875e-11	-3.6875e-11	-3.875e-11	-5.09375e-11	-4.125e-11	-3.96875e-11	-3.90625e-11	-3.34375e-11	-3.34375e-11
-7.8125e-11	-6.59375e-11	-6.3125e-11	-5.71875e-11	-6.03125e-11	-6.53125e-11	-5.09375e-11	-6.34375e-11	-6.4375e-11	-5.5e-11	-5.90625e-11	-6.5e-11	-5.75e-11		-4.25e-11	-4.03125e-11	-4.40625e-11	-3.59375e-11	-4.03125e-11	-3.59375e-11	-4.03125e-11	-4.46875e-11	-4.4375e-11	-3.84375e-11	-4.15625e-11	-3.90625e-11	-3.6875e-11
-7.75e-11	-7.03125e-11	-7.3125e-11	-6.09375e-11	-4.96875e-11	-6.65625e-11	-5.5e-11	-6.71875e-11	-6.15625e-11	-6.46875e-11	-5.90625e-11	-6.71875e-11	-6.53125e-11		-4.34375e-11	-4.1875e-11	-4.15625e-11	-3.90625e-11	-4.34375e-11	-3.71875e-11	-4.125e-11	-3.90625e-11	-4e-11	-4.09375e-11	-4.40625e-11	-3.875e-11	-3.5625e-11
-8.25e-11	-6.15625e-11	-7.5625e-11	-6.65625e-11	-5.59375e-11	-5.9375e-11	-5.84375e-11	-6.09375e-11	-6e-11	-6.375e-11	-6e-11	-6.65625e-11	-6.21875e-11		-4.1875e-11	-4.3125e-11	-4.0625e-11	-3.65625e-11	-4.375e-11	-4.03125e-11	-4.03125e-11	-3.71875e-11	-4.28125e-11	-4.28125e-11	-4.65625e-11	-3.34375e-11	-3.8125e-11
-7.75e-11	-6.9375e-11	-6.6875e-11	-6.6875e-11	-4.78125e-11	-7.28125e-11	-5.28125e-11	-6.1875e-11	-5.28125e-11	-5.75e-11	-5.84375e-11	-6.4375e-11	-5.90625e-11		-4.03125e-11	-4.375e-11	-4.09375e-11	-3.4375e-11	-4.40625e-11	-3.9375e-11	-4.21875e-11	-4.28125e-11	-4.03125e-11	-4.65625e-11	-4.15625e-11	-3.5e-11	-4.1875e-11
-7.40625e-11	-6.375e-11	-7.5e-11	-6.5625e-11	-5.59375e-11	-6.34375e-11	-5.21875e-11	-6.65625e-11	-5.59375e-11	-6.03125e-11	-6.09375e-11	-6.78125e-11	-6.40625e-11		-4.5e-11	-4.4375e-11	-4.09375e-11	-3.71875e-11	-4.1875e-11	-4.28125e-11	-4.4375e-11	-4.46875e-11	-3.9375e-11	-3.875e-11	-4.21875e-11	-3.78125e-11	-4.125e-11
-7.4375e-11	-6.28125e-11	-6.84375e-11	-5.90625e-11	-5.5e-11	-5.71875e-11	-5.59375e-11	-6.21875e-11	-5.90625e-11	-6.46875e-11	-6.40625e-11	-6.625e-11	-5.90625e-11		-4.65625e-11	-3.96875e-11	-4e-11	-3.78125e-11	-3.84375e-11	-3.90625e-11	-4.34375e-11	-4.3125e-11	-3.46875e-11	-3.40625e-11	-4.03125e-11	-3.8125e-11	-4.03125e-11
-7.4375e-11	-6.15625e-11	-6.6875e-11	-6.0625e-11	-5.09375e-11	-6.125e-11	-5.5625e-11	-5.9375e-11	-6.15625e-11	-5.65625e-11	-5.6875e-11	-6.5e-11	-6.6875e-11		-4.46875e-11	-4.3125e-11	-4.09375e-11	-4.53125e-11	-3.5e-11	-3.5625e-11	-4.25e-11	-4.84375e-11	-4e-11	-3.5e-11	-3.6875e-11	-3.9375e-11	-3.9375e-11
-8.34375e-11	-6.4375e-11	-7.75e-11	-5.90625e-11	-5.25e-11	-6.03125e-11	-5.28125e-11	-6.125e-11	-6.5e-11	-5.78125e-11	-5.96875e-11	-6.28125e-11	-5.6875e-11		-4.21875e-11	-4.90625e-11	-4.46875e-11	-4.71875e-11	-4.03125e-11	-4.09375e-11	-3.9375e-11	-4.84375e-11	-4.34375e-11	-3.34375e-11	-3.4375e-11	-4.15625e-11	-4.34375e-11
-8.03125e-11	-6.59375e-11	-7.1875e-11	-6.46875e-11	-5.5e-11	-5.46875e-11	-6.21875e-11	-5.84375e-11	-5.90625e-11	-5.53125e-11	-5.1875e-11	-6.84375e-11	-6.15625e-11		-4.09375e-11	-4.15625e-11	-4.4375e-11	-4.03125e-11	-4.34375e-11	-4.53125e-11	-3.5625e-11	-4.46875e-11	-4.40625e-11	-3.53125e-11	-4.84375e-11	-4.09375e-11	-4.09375e-11
-8.03125e-11	-6.34375e-11	-6.46875e-11	-6.15625e-11	-5.375e-11	-5.9375e-11	-5.84375e-11	-6.53125e-11	-5.71875e-11	-6.03125e-11	-5.9375e-11	-6.125e-11	-5.75e-11		-4.15625e-11	-4.03125e-11	-4.03125e-11	-4.1875e-11	-4.25e-11	-4.59375e-11	-3.84375e-11	-4.09375e-11	-3.9375e-11	-4.21875e-11	-4.5e-11	-4.34375e-11	-4.0625e-11
-7.71875e-11	-6.0625e-11	-6.6875e-11	-5.78125e-11	-5.65625e-11	-5.5625e-11	-5.5e-11	-6.28125e-11	-6.46875e-11	-5.875e-11	-6e-11	-5.6875e-11	-5.25e-11		-4.59375e-11	-4.84375e-11	-3.90625e-11	-4.1875e-11	-4.15625e-11	-3.6875e-11	-4.15625e-11	-4.375e-11	-3.46875e-11	-4.15625e-11	-4.21875e-11	-3.75e-11	-3.75e-11
-7.78125e-11	-7.1875e-11	-7.15625e-11	-5.4375e-11	-5.78125e-11	-5.40625e-11	-5.90625e-11	-5.6875e-11	-7.03125e-11	-6.4375e-11	-6e-11	-6.28125e-11	-6.28125e-11		-3.9375e-11	-4.03125e-11	-4.125e-11	-3.65625e-11	-4.3125e-11	-4.125e-11	-4.5e-11	-4.09375e-11	-3.46875e-11	-4.15625e-11	-3.5625e-11	-4.03125e-11	-3.4375e-11
-7.53125e-11	-6.84375e-11	-7.28125e-11	-6.28125e-11	-5.90625e-11	-6.53125e-11	-5.21875e-11	-6.59375e-11	-5.875e-11	-6.03125e-11	-6.15625e-11	-5.96875e-11	-6.09375e-11		-4.34375e-11	-4.25e-11	-4.21875e-11	-4.03125e-11	-4.1875e-11	-4.03125e-11	-4.15625e-11	-3.9375e-11	-4.125e-11	-4.21875e-11	-3.34375e-11	-3.78125e-11	-3.46875e-11
-7.40625e-11	-6.28125e-11	-6.6875e-11	-6.28125e-11	-6.65625e-11	-6.1875e-11	-5.28125e-11	-6.6875e-11	-6.09375e-11	-6.5e-11	-6.375e-11	-6.3125e-11	-6.1875e-11		-4.59375e-11	-4.59375e-11	-4.03125e-11	-4.03125e-11	-4.3125e-11	-3.71875e-11	-4.03125e-11	-4.4375e-11	-4.0625e-11	-4.5e-11	-3.5625e-11	-3.375e-11	-3.3125e-11
-7.3125e-11	-6.96875e-11	-6.71875e-11	-6.3125e-11	-5.15625e-11	-5.8125e-11	-5.5e-11	-5.84375e-11	-7.09375e-11	-5.5625e-11	-5.875e-11	-6.4375e-11	-6.21875e-11		-4.125e-11	-4.8125e-11	-3.875e-11	-3.8125e-11	-3.65625e-11	-3.65625e-11	-4.28125e-11	-4.53125e-11	-4.34375e-11	-3.90625e-11	-3.53125e-11	-3.375e-11	-4.0625e-11
-7.0625e-11	-6.40625e-11	-6.6875e-11	-5.90625e-11	-6e-11	-5.6875e-11	-5.4375e-11	-6.28125e-11	-6.09375e-11	-5.8125e-11	-5.21875e-11	-6.0625e-11	-6.5e-11		-4.78125e-11	-4.5e-11	-4.0625e-11	-3.40625e-11	-4.03125e-11	-3.46875e-11	-4.5625e-11	-4.65625e-11	-4.46875e-11	-3.53125e-11	-3.6875e-11	-3.5e-11	-4.15625e-11
-7.46875e-11	-6.3125e-11	-7.1875e-11	-5.9375e-11	-6.03125e-11	-6.875e-11	-5.90625e-11	-6.375e-11	-5.46875e-11	-6.09375e-11	-5.90625e-11	-6.6875e-11	-6.34375e-11		-4.65625e-11	-4.15625e-11	-4.5625e-11	-4.21875e-11	-4.75e-11	-3.84375e-11	-4.25e-11	-4.34375e-11	-4.03125e-11	-3.46875e-11	-3.90625e-11	-4.28125e-11	-3.5625e-11
-7.46875e-11	-6.5e-11	-6.96875e-11	-5.125e-11	-5.84375e-11	-6.28125e-11	-5.96875e-11	-6.5625e-11	-6.0625e-11	-5.78125e-11	-5.28125e-11	-6.25e-11	-5.75e-11		-4.21875e-11	-4.75e-11	-4.28125e-11	-3.90625e-11	-4.46875e-11	-4.375e-11	-4.34375e-11	-3.8125e-11	-3.78125e-11	-3.625e-11	-3.90625e-11	-3.8125e-11	-3.46875e-11
-6.75e-11	-6.65625e-11	-6.59375e-11	-5.3125e-11	-6.34375e-11	-6.65625e-11	-5.34375e-11	-6.03125e-11	-6.15625e-11	-5.15625e-11	-6.5e-11	-6.5e-11	-6.125e-11		-4.5e-11	-4.28125e-11	-3.90625e-11	-3.5625e-11	-4.3125e-11	-3.6875e-11	-4.3125e-11	-4.1875e-11	-4.09375e-11	-3.875e-11	-3.65625e-11	-4.09375e-11	-3.40625e-11
-7.34375e-11	-7.0625e-11	-6.84375e-11	-6.21875e-11	-5.96875e-11	-6.6875e-11	-5.96875e-11	-6.3125e-11	-6.03125e-11	-6.375e-11	-6.09375e-11	-6.375e-11	-6.5e-11		-4.53125e-11	-4.40625e-11	-4.375e-11	-4.46875e-11	-4.71875e-11	-4.0625e-11	-3.625e-11	-4.3125e-11	-4.09375e-11	-4.1875e-11	-4.125e-11	-3.59375e-11	-3.6875e-11
-7.28125e-11	-6.53125e-11	-7.375e-11	-6.15625e-11	-5.59375e-11	-6.03125e-11	-4.78125e-11	-7.09375e-11	-5.84375e-11	-6.375e-11	-5e-11	-6.71875e-11	-5.75e-11		-4.0625e-11	-4.03125e-11	-4.34375e-11	-4.09375e-11	-4.40625e-11	-3.90625e-11	-4.21875e-11	-4.6875e-11	-4.46875e-11	-4.40625e-11	-3.84375e-11	-3.5e-11	-3.6875e-11
-7.09375e-11	-6.34375e-11	-6.71875e-11	-5.6875e-11	-5.5e-11	-6e-11	-6.03125e-11	-6.59375e-11	-5.875e-11	-6.40625e-11	-6.15625e-11	-6.0625e-11	-6.59375e-11		-3.78125e-11	-3.625e-11	-4.375e-11	-4.46875e-11	-4.65625e-11	-4.15625e-11	-4.375e-11	-4.5e-11	-3.90625e-11	-4.125e-11	-3.8125e-11	-3.71875e-11	-3.71875e-11
-6.71875e-11	-5.5e-11	-7.21875e-11	-6.03125e-11	-5.40625e-11	-6.5625e-11	-5e-11	-5.90625e-11	-6.46875e-11	-6.1875e-11	-5.8125e-11	-6.5e-11	-5.875e-11		-4.1875e-11	-3.84375e-11	-4.09375e-11	-4.15625e-11	-4.4375e-11	-4.15625e-11	-4.21875e-11	-4.46875e-11	-3.875e-11	-3.875e-11	-3.71875e-11	-3.84375e-11	-3.3125e-11
-7.09375e-11	-5.65625e-11	-6.8125e-11	-5.46875e-11	-6e-11	-6.15625e-11	-5.15625e-11	-5.5e-11	-5.90625e-11	-6.5e-11	-5.65625e-11	-6e-11	-5.71875e-11		-4.4375e-11	-4.21875e-11	-4.28125e-11	-4.09375e-11	-3.78125e-11	-4.3125e-11	-4.0625e-11	-4.53125e-11	-3.625e-11	-3.8125e-11	-4.40625e-11	-3.9375e-11	-3.3125e-11
-7.28125e-11	-6.75e-11	-6.75e-11	-6.28125e-11	-5.25e-11	-5.84375e-11	-5.5e-11	-6.65625e-11	-6.15625e-11	-5.71875e-11	-5.53125e-11	-5.9375e-11	-5.71875e-11		-4.15625e-11	-4.4375e-11	-3.9375e-11	-4.28125e-11	-4.40625e-11	-3.75e-11	-4.1875e-11	-4.40625e-11	-4.125e-11	-4.15625e-11	-4.4375e-11	-4.09375e-11	-4.03125e-11
-7.1875e-11	-6.46875e-11	-6.96875e-11	-5.03125e-11	-5.96875e-11	-5.8125e-11	-4.875e-11	-6.78125e-11	-6.0625e-11	-6.28125e-11	-5.40625e-11	-6.5e-11	-5.8125e-11		-4.34375e-11	-4.90625e-11	-3.71875e-11	-4.4375e-11	-4.6875e-11	-3.40625e-11	-3.9375e-11	-4.21875e-11	-3.875e-11	-4.03125e-11	-4.15625e-11	-3.84375e-11	-4.3125e-11
-7.4375e-11	-6.65625e-11	-6.5e-11	-5.84375e-11	-4.84375e-11	-6.28125e-11	-4.875e-11	-6.59375e-11	-6.28125e-11	-5.84375e-11	-5.9375e-11	-6.46875e-11	-5.65625e-11		-3.84375e-11	-4.21875e-11	-4.125e-11	-4.09375e-11	-4.71875e-11	-4.40625e-11	-3.84375e-11	-4.0625e-11	-3.625e-11	-3.96875e-11	-3.5e-11	-3.59375e-11	-4.0625e-11
-7e-11	-6.46875e-11	-6.4375e-11	-6.21875e-11	-5.25e-11	-6.28125e-11	-5.34375e-11	-6.46875e-11	-6.46875e-11	-5.9375e-11	-6.125e-11	-5.8125e-11	-5.90625e-11		-4.125e-11	-4.25e-11	-4.1875e-11	-4.03125e-11	-4.15625e-11	-4.5e-11	-4.3125e-11	-4.1875e-11	-3.0625e-11	-4.03125e-11	-3.65625e-11	-3.84375e-11	-3.8125e-11
-7.46875e-11	-6.34375e-11	-7.03125e-11	-6.125e-11	-5.84375e-11	-5.71875e-11	-5.46875e-11	-6.4375e-11	-6.28125e-11	-6.46875e-11	-5.8125e-11	-6.71875e-11	-5.6875e-11		-4.59375e-11	-4.59375e-11	-3.75e-11	-3.8125e-11	-4.28125e-11	-3.8125e-11	-4.40625e-11	-4.5e-11	-3.46875e-11	-4.40625e-11	-3.53125e-11	-3.90625e-11	-3.8125e-11
-7.15625e-11	-6.15625e-11	-6.90625e-11	-6.15625e-11	-5.15625e-11	-5.78125e-11	-5.5e-11	-6.15625e-11	-6.09375e-11	-6.375e-11	-5.53125e-11	-6.4375e-11	-5.90625e-11		-4.4375e-11	-4.875e-11	-3.5e-11	-4.5e-11	-4.09375e-11	-3.90625e-11	-4.21875e-11	-4.5625e-11	-4.15625e-11	-3.8125e-11	-3.71875e-11	-3.46875e-11	-3.90625e-11
-7.5e-11	-5.78125e-11	-6.65625e-11	-6.5e-11	-5.5e-11	-6.40625e-11	-5.125e-11	-6.4375e-11	-6.0625e-11	-5.90625e-11	-5.65625e-11	-6.3125e-11	-6.65625e-11		-4.46875e-11	-5.03125e-11	-4.09375e-11	-4.3125e-11	-4.03125e-11	-3.8125e-11	-4.28125e-11	-4.78125e-11	-4.34375e-11	-4.03125e-11	-3.9375e-11	-3.59375e-11	-3.96875e-11
-7.34375e-11	-6.78125e-11	-7e-11	-6e-11	-5.5e-11	-6.3125e-11	-5.28125e-11	-5.96875e-11	-5.8125e-11	-6.03125e-11	-6.78125e-11	-6.125e-11	-6.0625e-11		-4.75e-11	-4.71875e-11	-4.78125e-11	-3.6875e-11	-4.03125e-11	-3.65625e-11	-4.03125e-11	-3.84375e-11	-3.84375e-11	-4.46875e-11	-3.96875e-11	-3.34375e-11	-3.46875e-11
-6.5e-11	-6.15625e-11	-7.25e-11	-6.0625e-11	-4.96875e-11	-5.5625e-11	-5.40625e-11	-6.625e-11	-6.34375e-11	-5.5e-11	-5.71875e-11	-6.34375e-11	-5.46875e-11		-4.53125e-11	-4.28125e-11	-4.1875e-11	-3.59375e-11	-4.1875e-11	-4.0625e-11	-4.375e-11	-4.40625e-11	-4.03125e-11	-4.28125e-11	-3.65625e-11	-3.78125e-11	-3.71875e-11
-7.53125e-11	-6.28125e-11	-7.28125e-11	-5.71875e-11	-5.53125e-11	-5.53125e-11	-5.375e-11	-7e-11	-5.65625e-11	-6.21875e-11	-6.15625e-11	-6.59375e-11	-6.03125e-11		-5.03125e-11	-4.40625e-11	-3.78125e-11	-4.1875e-11	-4.40625e-11	-4.1875e-11	-4e-11	-4e-11	-4.0625e-11	-3.5625e-11	-3.625e-11	-4.03125e-11	-3.34375e-11
-7.5e-11	-6.40625e-11	-6.71875e-11	-6.40625e-11	-5.75e-11	-6.40625e-11	-5.21875e-11	-6.53125e-11	-5.96875e-11	-5.75e-11	-5.8125e-11	-5.6875e-11	-6.03125e-11		-4.46875e-11	-4.25e-11	-4.09375e-11	-4.3125e-11	-4.34375e-11	-3.84375e-11	-3.625e-11	-4.15625e-11	-3.75e-11	-3.40625e-11	-3.875e-11	-3.8125e-11	-3.53125e-11
-7.5625e-11	-6.53125e-11	-6.90625e-11	-6.15625e-11	-5.28125e-11	-5.90625e-11	-5.75e-11	-6.40625e-11	-6.15625e-11	-5.65625e-11	-6.21875e-11	-6.15625e-11	-5.96875e-11		-3.96875e-11	-3.71875e-11	-4.03125e-11	-4.125e-11	-3.90625e-11	-3.9375e-11	-4.28125e-11	-4.09375e-11	-4.1875e-11	-4.03125e-11	-3.75e-11	-3.5625e-11	-4.03125e-11
-7.09375e-11	-6.5e-11	-6.875e-11	-5.96875e-11	-5.09375e-11	-5.71875e-11	-5.375e-11	-6.40625e-11	-6.15625e-11	-6.0625e-11	-5.78125e-11	-7.03125e-11	-6.40625e-11		-3.6875e-11	-4.15625e-11	-4.46875e-11	-4.15625e-11	-3.9375e-11	-4.375e-11	-3.8125e-11	-4.3125e-11	-4.15625e-11	-4.03125e-11	-3.59375e-11	-3.40625e-11	-3.9375e-11
-6.96875e-11	-6.84375e-11	-6.875e-11	-6.21875e-11	-5.6875e-11	-5.6875e-11	-5.96875e-11	-6.1875e-11	-6.40625e-11	-6.3125e-11	-5.09375e-11	-6.5e-11	-5.40625e-11		-4.375e-11	-3.96875e-11	-4.1875e-11	-4.59375e-11	-4.25e-11	-3.90625e-11	-4.21875e-11	-4.40625e-11	-3.96875e-11	-3.71875e-11	-3.53125e-11	-3.71875e-11	-3.46875e-11
-6.96875e-11	-6.65625e-11	-6.6875e-11	-5.15625e-11	-5.375e-11	-6.25e-11	-5.875e-11	-6.3125e-11	-6.15625e-11	-5.40625e-11	-5.6875e-11	-6.5e-11	-5.90625e-11		-4.28125e-11	-4.15625e-11	-4.0625e-11	-4.40625e-11	-4.34375e-11	-4.21875e-11	-3.8125e-11	-4.5e-11	-4.125e-11	-4.03125e-11	-3.9375e-11	-4.03125e-11	-3.46875e-11
-7.21875e-11	-7.28125e-11	-6.53125e-11	-6.40625e-11	-4.71875e-11	-7e-11	-5.34375e-11	-5.9375e-11	-5.84375e-11	-5.65625e-11	-5.375e-11	-6.78125e-11	-6.71875e-11		-4.1875e-11	-4.28125e-11	-4.0625e-11	-4.28125e-11	-4.53125e-11	-4.03125e-11	-3.84375e-11	-4.09375e-11	-4.46875e-11	-3.84375e-11	-4.34375e-11	-3.78125e-11	-3.40625e-11
-7.0625e-11	-6.53125e-11	-6.3125e-11	-6.5e-11	-5.21875e-11	-6.46875e-11	-5.03125e-11	-6.53125e-11	-6.5e-11	-6.03125e-11	-5.71875e-11	-5.3125e-11	-5.8125e-11		-4.28125e-11	-4.59375e-11	-4.40625e-11	-3.875e-11	-4.6875e-11	-4.78125e-11	-4.03125e-11	-4.78125e-11	-4.4375e-11	-4.34375e-11	-4.1875e-11	-3.5625e-11	-3.59375e-11
-7.625e-11	-6.53125e-11	-6.09375e-11	-5.1875e-11	-5.625e-11	-6.46875e-11	-6.09375e-11	-6.6875e-11	-6.25e-11	-6.15625e-11	-5.875e-11	-6.15625e-11	-6.03125e-11		-4.5e-11	-4.53125e-11	-4.0625e-11	-3.90625e-11	-4.40625e-11	-4.28125e-11	-3.90625e-11	-4.6875e-11	-4.34375e-11	-4.40625e-11	-3.53125e-11	-3.625e-11	-3.4375e-11
-7.09375e-11	-6.78125e-11	-6.78125e-11	-5.78125e-11	-5.34375e-11	-6.28125e-11	-6.21875e-11	-6.0625e-11	-5.9375e-11	-5.6875e-11	-6.3125e-11	-6.28125e-11	-6.0625e-11		-5.03125e-11	-4.5625e-11	-4.28125e-11	-4.375e-11	-3.78125e-11	-4.15625e-11	-4.28125e-11	-4.5625e-11	-3.59375e-11	-4.03125e-11	-3.40625e-11	-3.78125e-11	-3.6875e-11
-7.9375e-11	-6.8125e-11	-6.46875e-11	-6.3125e-11	-5.03125e-11	-5.625e-11	-4.90625e-11	-5.90625e-11	-6.28125e-11	-6e-11	-6.40625e-11	-6.28125e-11	-5.9375e-11		-4.53125e-11	-4.46875e-11	-4.28125e-11	-4.5625e-11	-4.21875e-11	-3.90625e-11	-4.5e-11	-5.03125e-11	-3.34375e-11	-3.875e-11	-3.625e-11	-4.03125e-11	-3.96875e-11
-7.21875e-11	-6.40625e-11	-6.5625e-11	-6.15625e-11	-5.90625e-11	-6.625e-11	-5.9375e-11	-5.84375e-11	-5.625e-11	-5.5e-11	-5.78125e-11	-5.65625e-11	-5.96875e-11		-4.46875e-11	-4.15625e-11	-4.53125e-11	-4.03125e-11	-4.40625e-11	-4.46875e-11	-4.78125e-11	-4.3125e-11	-4e-11	-4.375e-11	-3.6875e-11	-3.625e-11	-4.125e-11
-7.25e-11	-6.90625e-11	-6.40625e-11	-6.125e-11	-5.78125e-11	-6.46875e-11	-5.96875e-11	-6.625e-11	-6.40625e-11	-6.28125e-11	-6.21875e-11	-5.9375e-11	-6.90625e-11		-3.90625e-11	-4.34375e-11	-4.09375e-11	-4.03125e-11	-4.34375e-11	-4.03125e-11	-4.3125e-11	-4.4375e-11	-4.15625e-11	-4.3125e-11	-3.90625e-11	-3.65625e-11	-4.21875e-11
-7.5e-11	-6.46875e-11	-6.75e-11	-6.6875e-11	-5.40625e-11	-6.46875e-11	-5.4375e-11	-5.6875e-11	-6.40625e-11	-5.8125e-11	-6.125e-11	-6.34375e-11	-6.125e-11		-4.03125e-11	-4.5e-11	-4.3125e-11	-3.84375e-11	-4.3125e-11	-3.90625e-11	-4.21875e-11	-4.53125e-11	-4.28125e-11	-3.65625e-11	-3.90625e-11	-3.8125e-11	-3.875e-11
-8.09375e-11	-7.21875e-11	-6.53125e-11	-5.65625e-11	-5.0625e-11	-7e-11	-4.90625e-11	-6.375e-11	-6.375e-11	-5.90625e-11	-6.34375e-11	-6.6875e-11	-5.09375e-11		-3.6875e-11	-4.34375e-11	-4.3125e-11	-4.1875e-11	-4.5e-11	-4.03125e-11	-3.90625e-11	-4.1875e-11	-4.15625e-11	-3.21875e-11	-4.5e-11	-3.75e-11	-4.1875e-11
-7.15625e-11	-6.8125e-11	-7.5625e-11	-5.65625e-11	-5.78125e-11	-5.875e-11	-5.46875e-11	-6.625e-11	-6.4375e-11	-6.125e-11	-6e-11	-6e-11	-5.5625e-11		-3.84375e-11	-4.5625e-11	-4.5e-11	-3.875e-11	-4.28125e-11	-4.09375e-11	-4.15625e-11	-4.78125e-11	-3.9375e-11	-3.34375e-11	-4.03125e-11	-2.78125e-11	-4.40625e-11
-6.71875e-11	-6.40625e-11	-5.96875e-11	-5.84375e-11	-5.9375e-11	-6.09375e-11	-5.84375e-11	-6.21875e-11	-6.375e-11	-6.125e-11	-5.40625e-11	-6.28125e-11	-5.46875e-11		-4.0625e-11	-4.65625e-11	-4.34375e-11	-4.09375e-11	-4.09375e-11	-4.03125e-11	-4.46875e-11	-4.40625e-11	-3.6875e-11	-4.40625e-11	-3.34375e-11	-3.375e-11	-4.15625e-11
-6.90625e-11	-7.46875e-11	-6.78125e-11	-6.125e-11	-5.71875e-11	-6.03125e-11	-6.0625e-11	-6.5e-11	-6.75e-11	-6.125e-11	-6.0625e-11	-6.5e-11	-6e-11		-4.53125e-11	-4.46875e-11	-4.28125e-11	-3.8125e-11	-4.21875e-11	-4.15625e-11	-4.375e-11	-4.375e-11	-3.46875e-11	-4.59375e-11	-3.90625e-11	-3.59375e-11	-3.5e-11
-7.625e-11	-6.84375e-11	-7.03125e-11	-4.96875e-11	-5.21875e-11	-6.03125e-11	-5.1875e-11	-6.375e-11	-6.21875e-11	-6.09375e-11	-5.3125e-11	-6.21875e-11	-5.84375e-11		-4.71875e-11	-4.59375e-11	-4.4375e-11	-4.125e-11	-4.21875e-11	-4.03125e-11	-4.09375e-11	-4.6875e-11	-3.8125e-11	-3.84375e-11	-4.03125e-11	-3.53125e-11	-3.28125e-11
-7.1875e-11	-6.65625e-11	-6.71875e-11	-5.65625e-11	-5.3125e-11	-6.03125e-11	-5.125e-11	-7.09375e-11	-6.15625e-11	-5.84375e-11	-5.90625e-11	-6.46875e-11	-6.375e-11		-4.03125e-11	-4.40625e-11	-4.40625e-11	-4.21875e-11	-4.28125e-11	-3.78125e-11	-3.71875e-11	-4.25e-11	-4.34375e-11	-3.9375e-11	-3.8125e-11	-3.65625e-11	-3.65625e-11
-7.4375e-11	-7.03125e-11	-6.9375e-11	-5.46875e-11	-5.28125e-11	-6.21875e-11	-5.40625e-11	-6.4375e-11	-6.84375e-11	-5.78125e-11	-6.5e-11	-6.84375e-11	-5.59375e-11		-4.03125e-11	-4.34375e-11	-4.15625e-11	-4.21875e-11	-4.15625e-11	-4.1875e-11	-4.1875e-11	-4.34375e-11	-4.4375e-11	-4.09375e-11	-4.03125e-11	-4.15625e-11	-3.78125e-11
-7.4375e-11	-7.25e-11	-7.25e-11	-5.4375e-11	-4.59375e-11	-6.59375e-11	-5.1875e-11	-6.90625e-11	-6.53125e-11	-5.6875e-11	-6.21875e-11	-6.15625e-11	-6.15625e-11		-4.5e-11	-4.40625e-11	-4.03125e-11	-4.15625e-11	-4.25e-11	-4.40625e-11	-4.09375e-11	-4.46875e-11	-3.90625e-11	-3.875e-11	-3.5e-11	-3.65625e-11	-3.8125e-11
-7.03125e-11	-7.03125e-11	-6.875e-11	-5.40625e-11	-5.40625e-11	-5.9375e-11	-5.59375e-11	-7.03125e-11	-5.65625e-11	-5.75e-11	-5.78125e-11	-6.6875e-11	-5.125e-11		-4.25e-11	-4.78125e-11	-3.65625e-11	-3.96875e-11	-4.875e-11	-4.6875e-11	-4.125e-11	-4.40625e-11	-4.15625e-11	-4.03125e-11	-3.5e-11	-3.8125e-11	-3.84375e-11
-7e-11	-6.65625e-11	-7.3125e-11	-5.90625e-11	-5.25e-11	-6.21875e-11	-5.71875e-11	-6.53125e-11	-6.125e-11	-5.8125e-11	-6.28125e-11	-6.34375e-11	-5.84375e-11		-4.28125e-11	-4.9375e-11	-4.3125e-11	-3.46875e-11	-4.4375e-11	-4.375e-11	-4.375e-11	-4.3125e-11	-4.28125e-11	-3.78125e-11	-3.53125e-11	-3.96875e-11	-3.90625e-11
-7.875e-11	-6.75e-11	-7.09375e-11	-5.59375e-11	-5.78125e-11	-5.46875e-11	-5.40625e-11	-7.0625e-11	-6.875e-11	-5.875e-11	-6.5e-11	-7.40625e-11	-6.0625e-11		-3.78125e-11	-4.5e-11	-4.34375e-11	-3.90625e-11	-4.28125e-11	-3.875e-11	-4.78125e-11	-4.15625e-11	-4.5e-11	-3.59375e-11	-3.78125e-11	-4.375e-11	-4.03125e-11
-7.5e-11	-7.28125e-11	-6.96875e-11	-5.8125e-11	-4.875e-11	-6.40625e-11	-5.71875e-11	-6.8125e-11	-6.40625e-11	-5.5625e-11	-6.34375e-11	-6.75e-11	-6.09375e-11		-3.875e-11	-4.5e-11	-4.03125e-11	-4.21875e-11	-4.28125e-11	-3.46875e-11	-4.25e-11	-4.28125e-11	-4.34375e-11	-3.875e-11	-4.40625e-11	-4.3125e-11	-4.125e-11
-7.40625e-11	-6.6875e-11	-6.90625e-11	-5.8125e-11	-5.34375e-11	-5.78125e-11	-4.875e-11	-6.53125e-11	-6.28125e-11	-5.78125e-11	-5.90625e-11	-6.84375e-11	-5.90625e-11		-4.15625e-11	-4.28125e-11	-4.25e-11	-4.03125e-11	-4.125e-11	-3.90625e-11	-3.65625e-11	-4.46875e-11	-4.125e-11	-3.71875e-11	-4.15625e-11	-4.03125e-11	-3.4375e-11
-7.28125e-11	-6.375e-11	-6.875e-11	-5.78125e-11	-5.03125e-11	-5.53125e-11	-5.90625e-11	-6.6875e-11	-6.6875e-11	-5.90625e-11	-6.5625e-11	-6.59375e-11	-6.4375e-11		-4.65625e-11	-4.28125e-11	-3.90625e-11	-4.125e-11	-4.0625e-11	-4.09375e-11	-3.90625e-11	-4.6875e-11	-3.71875e-11	-3.96875e-11	-3.65625e-11	-3.90625e-11	-3.34375e-11
-7.375e-11	-6.375e-11	-7.59375e-11	-5.75e-11	-5.28125e-11	-6.25e-11	-5.90625e-11	-7.03125e-11	-6.6875e-11	-5.21875e-11	-6.34375e-11	-7.03125e-11	-6.4375e-11		-4.65625e-11	-3.9375e-11	-4.03125e-11	-3.96875e-11	-4.03125e-11	-3.90625e-11	-3.625e-11	-4.40625e-11	-3.28125e-11	-4.40625e-11	-3.6875e-11	-4.375e-11	-3.75e-11
-6.90625e-11	-6.71875e-11	-6.65625e-11	-5.9375e-11	-5.09375e-11	-6.0625e-11	-5.875e-11	-6.28125e-11	-7.0625e-11	-5.875e-11	-5.8125e-11	-6.65625e-11	-6.03125e-11		-4.71875e-11	-4.40625e-11	-4.40625e-11	-4.25e-11	-4.46875e-11	-3.9375e-11	-3.84375e-11	-4.03125e-11	-3.90625e-11	-3.59375e-11	-3.59375e-11	-4.28125e-11	-3.84375e-11
-6.875e-11	-6.90625e-11	-6.5e-11	-5.59375e-11	-5.40625e-11	-6.1875e-11	-5.3125e-11	-6.3125e-11	-6.375e-11	-6.1875e-11	-6.03125e-11	-6.8125e-11	-5.4375e-11		-4.59375e-11	-4.59375e-11	-4.21875e-11	-4.03125e-11	-4.34375e-11	-3.90625e-11	-3.34375e-11	-4.03125e-11	-3.84375e-11	-3.90625e-11	-3.6875e-11	-3.40625e-11	-4.03125e-11
-7.46875e-11	-6.71875e-11	-7.1875e-11	-5.46875e-11	-5.21875e-11	-5.75e-11	-5.5625e-11	-6.8125e-11	-6.5e-11	-5.84375e-11	-6.28125e-11	-7.0625e-11	-6.4375e-11		-4.21875e-11	-4.53125e-11	-4.03125e-11	-4.25e-11	-4.5625e-11	-3.84375e-11	-4.0625e-11	-4.0625e-11	-4.25e-11	-3.96875e-11	-3.78125e-11	-3.5625e-11	-3.6875e-11
-7.53125e-11	-6.71875e-11	-7.03125e-11	-5.71875e-11	-5.5e-11	-6.71875e-11	-6.4375e-11	-6.40625e-11	-6.71875e-11	-6.0625e-11	-6e-11	-6.6875e-11	-5.625e-11		-4.28125e-11	-4.5625e-11	-4.15625e-11	-4.5e-11	-4.25e-11	-4.40625e-11	-4.03125e-11	-4.03125e-11	-4.5e-11	-3.71875e-11	-4.15625e-11	-3.46875e-11	-4.28125e-11
-7.5e-11	-6.3125e-11	-7.46875e-11	-5.5e-11	-5.5e-11	-5.5625e-11	-6.46875e-11	-6.59375e-11	-6.84375e-11	-5.875e-11	-6e-11	-6.3125e-11	-6e-11		-4.53125e-11	-4.8125e-11	-4.5e-11	-4.5625e-11	-4.09375e-11	-4.53125e-11	-3.90625e-11	-4.8125e-11	-4.4375e-11	-3.84375e-11	-3.84375e-11	-2.84375e-11	-3.78125e-11
-7.625e-11	-6.53125e-11	-7.5e-11	-5.6875e-11	-5.4375e-11	-5.875e-11	-5.5e-11	-6.6875e-11	-5.96875e-11	-5.78125e-11	-5.84375e-11	-7e-11	-5.75e-11		-4.1875e-11	-4.46875e-11	-4.3125e-11	-4.78125e-11	-4e-11	-4.09375e-11	-3.9375e-11	-5e-11	-3.59375e-11	-4.03125e-11	-3.59375e-11	-2.90625e-11	-4.1875e-11
-7.40625e-11	-6.15625e-11	-6.75e-11	-5.71875e-11	-5.46875e-11	-6.46875e-11	-5.8125e-11	-6.8125e-11	-7.125e-11	-5.625e-11	-7.09375e-11	-6.15625e-11	-5.46875e-11		-4.4375e-11	-4.15625e-11	-4.03125e-11	-4.34375e-11	-4.09375e-11	-4.40625e-11	-3.875e-11	-4.9375e-11	-3.34375e-11	-3.53125e-11	-3.78125e-11	-3.4375e-11	-3.4375e-11
-7.84375e-11	-7.4375e-11	-7.03125e-11	-5.96875e-11	-5.15625e-11	-5.53125e-11	-6.09375e-11	-6.8125e-11	-7e-11	-6.125e-11	-5.71875e-11	-6.6875e-11	-6.15625e-11		-4.34375e-11	-4.03125e-11	-4.4375e-11	-4.15625e-11	-4.59375e-11	-3.875e-11	-4e-11	-4.53125e-11	-3.90625e-11	-3.4375e-11	-3.5e-11	-3.875e-11	-3.3125e-11
-7.8125e-11	-7.34375e-11	-6.375e-11	-5.84375e-11	-5.5e-11	-5.78125e-11	-6.625e-11	-6.125e-11	-6.5e-11	-5.75e-11	-6.15625e-11	-6.71875e-11	-5.5625e-11		-3.5e-11	-3.8125e-11	-4.375e-11	-4.375e-11	-4.8125e-11	-3.5625e-11	-4.1875e-11	-4.65625e-11	-4.03125e-11	-3.78125e-11	-3.15625e-11	-3.5e-11	-3.78125e-11
-7.34375e-11	-6.96875e-11	-7.5e-11	-6.0625e-11	-6.40625e-11	-5.59375e-11	-6.03125e-11	-6.03125e-11	-6.53125e-11	-5.5625e-11	-6.15625e-11	-7.46875e-11	-6.375e-11		-3.46875e-11	-4.0625e-11	-4.3125e-11	-4.125e-11	-4.4375e-11	-3.9375e-11	-4.53125e-11	-4.0625e-11	-3.78125e-11	-4.5e-11	-3.5e-11	-3.625e-11	-4.53125e-11
-7.875e-11	-7.34375e-11	-6.59375e-11	-5.71875e-11	-5.4375e-11	-6.09375e-11	-6.3125e-11	-6.46875e-11	-6.5625e-11	-6.09375e-11	-5.96875e-11	-6.3125e-11	-6.53125e-11		-4.03125e-11	-4.75e-11	-4.21875e-11	-4.21875e-11	-4.53125e-11	-4.59375e-11	-4.5625e-11	-4.03125e-11	-4.46875e-11	-4.15625e-11	-4.375e-11	-3.21875e-11	-4.03125e-11
-6.875e-11	-6.8125e-11	-6.65625e-11	-5.3125e-11	-5.21875e-11	-5.96875e-11	-5.65625e-11	-6.4375e-11	-6e-11	-5.9375e-11	-6.09375e-11	-6.78125e-11	-5.90625e-11		-4.0625e-11	-5.03125e-11	-4.0625e-11	-4.1875e-11	-4.78125e-11	-4.28125e-11	-4.03125e-11	-4.59375e-11	-4.5625e-11	-4e-11	-3.8125e-11	-3.53125e-11	-4.03125e-11
-7.65625e-11	-6.6875e-11	-6.40625e-11	-5.78125e-11	-5.53125e-11	-5.59375e-11	-6.40625e-11	-7.125e-11	-6.96875e-11	-6.03125e-11	-6e-11	-6.6875e-11	-5.78125e-11		-4.375e-11	-4.53125e-11	-4.25e-11	-3.75e-11	-4.6875e-11	-4.25e-11	-4.125e-11	-4.75e-11	-3.8125e-11	-4.3125e-11	-3.65625e-11	-3.59375e-11	-3.75e-11
-7.21875e-11	-7.03125e-11	-7.3125e-11	-5.59375e-11	-5.875e-11	-5.59375e-11	-6.03125e-11	-6.65625e-11	-6.1875e-11	-5.875e-11	-6.34375e-11	-5.96875e-11	-5.6875e-11		-4.9375e-11	-4.8125e-11	-4.28125e-11	-3.46875e-11	-4.1875e-11	-4.21875e-11	-4.15625e-11	-4.15625e-11	-3.78125e-11	-3.84375e-11	-3.84375e-11	-4.34375e-11	-3.5625e-11
-7.21875e-11	-7.0625e-11	-6.59375e-11	-6.6875e-11	-5.53125e-11	-5.78125e-11	-4.96875e-11	-6.53125e-11	-7.03125e-11	-6.21875e-11	-6.78125e-11	-6.5e-11	-5.46875e-11		-4.34375e-11	-4.875e-11	-4.25e-11	-3.78125e-11	-4.125e-11	-4.5e-11	-3.8125e-11	-4.4375e-11	-4.34375e-11	-3.59375e-11	-3.46875e-11	-4.0625e-11	-3.9375e-11
-7.78125e-11	-7.3125e-11	-6.4375e-11	-5.6875e-11	-5.625e-11	-5.5e-11	-5.78125e-11	-6.4375e-11	-6.5e-11	-5.6875e-11	-6.46875e-11	-7.15625e-11	-5.46875e-11		-4.3125e-11	-3.84375e-11	-3.875e-11	-4.375e-11	-4.53125e-11	-3.9375e-11	-4.1875e-11	-4.28125e-11	-4.15625e-11	-3.4375e-11	-3.75e-11	-3.5625e-11	-3.625e-11
-7.3125e-11	-7.03125e-11	-6.875e-11	-5.46875e-11	-4.6875e-11	-5.84375e-11	-5.75e-11	-6.5e-11	-6.28125e-11	-5.5625e-11	-5.40625e-11	-6.21875e-11	-6.03125e-11		-4.28125e-11	-4.03125e-11	-4.03125e-11	-4.4375e-11	-4.0625e-11	-3.625e-11	-4.65625e-11	-4.28125e-11	-4e-11	-3.78125e-11	-4.28125e-11	-3.90625e-11	-4.0625e-11
-7.375e-11	-6.96875e-11	-6.75e-11	-6.1875e-11	-5.53125e-11	-5.71875e-11	-5.4375e-11	-6.28125e-11	-6.875e-11	-6.09375e-11	-6.40625e-11	-6.53125e-11	-6.03125e-11		-4.375e-11	-4.4375e-11	-4.1875e-11	-4.15625e-11	-3.9375e-11	-3.78125e-11	-4.3125e-11	-4.28125e-11	-3.65625e-11	-3.625e-11	-3.875e-11	-4.1875e-11	-4.28125e-11
-7.21875e-11	-6.46875e-11	-6.96875e-11	-6.03125e-11	-5.25e-11	-6e-11	-5.90625e-11	-6.40625e-11	-6.625e-11	-5.53125e-11	-6.0625e-11	-6.71875e-11	-5.46875e-11		-4.3125e-11	-4.34375e-11	-4.21875e-11	-3.65625e-11	-4.09375e-11	-3.65625e-11	-4.09375e-11	-4.09375e-11	-3.625e-11	-3.65625e-11	-3.40625e-11	-4.4375e-11	-3.90625e-11
-8.21875e-11	-6.71875e-11	-6.6875e-11	-6.15625e-11	-4.75e-11	-6.375e-11	-5.53125e-11	-6.59375e-11	-6.21875e-11	-6.34375e-11	-6.09375e-11	-6.71875e-11	-5.8125e-11		-4.15625e-11	-4.3125e-11	-4.15625e-11	-4.125e-11	-3.96875e-11	-3.5625e-11	-4.09375e-11	-3.875e-11	-3.625e-11	-3.84375e-11	-3.46875e-11	-3.46875e-11	-3.59375e-11
-6.8125e-11	-6.375e-11	-6.59375e-11	-6.28125e-11	-5.03125e-11	-5.78125e-11	-5.59375e-11	-7.0625e-11	-6.78125e-11	-5.71875e-11	-6.34375e-11	-6.53125e-11	-6.0625e-11		-4.34375e-11	-4.53125e-11	-3.9375e-11	-3.90625e-11	-3.5e-11	-3.84375e-11	-4.28125e-11	-4.53125e-11	-3.9375e-11	-4.09375e-11	-3.21875e-11	-3.5e-11	-3.65625e-11
-7.625e-11	-6.8125e-11	-6.59375e-11	-5.65625e-11	-4.96875e-11	-6.15625e-11	-4.84375e-11	-6.8125e-11	-6.5e-11	-5.1875e-11	-6.15625e-11	-6.78125e-11	-5.875e-11		-4.5e-11	-4.28125e-11	-3.90625e-11	-3.875e-11	-3.65625e-11	-4.21875e-11	-4.15625e-11	-4.40625e-11	-3.8125e-11	-3.71875e-11	-3.125e-11	-3.78125e-11	-3.59375e-11
-6.9375e-11	-6.28125e-11	-6.75e-11	-5.34375e-11	-5.34375e-11	-6.28125e-11	-5.96875e-11	-5.96875e-11	-6.6875e-11	-5.59375e-11	-6.90625e-11	-6.625e-11	-5.65625e-11		-4.40625e-11	-4.09375e-11	-3.84375e-11	-4.15625e-11	-4.25e-11	-3.78125e-11	-4.40625e-11	-3.75e-11	-4.03125e-11	-3.90625e-11	-4.3125e-11	-3.34375e-11	-3.90625e-11
-7.84375e-11	-6.84375e-11	-7e-11	-5.96875e-11	-4.96875e-11	-5.9375e-11	-5.65625e-11	-7.03125e-11	-6.625e-11	-6.34375e-11	-5.71875e-11	-6.40625e-11	-5.96875e-11		-4.09375e-11	-4.03125e-11	-3.90625e-11	-3.84375e-11	-4.375e-11	-3.90625e-11	-3.59375e-11	-4.15625e-11	-3.875e-11	-4.5625e-11	-4.65625e-11	-3.59375e-11	-4.0625e-11
-7.125e-11	-6.46875e-11	-7.28125e-11	-5.53125e-11	-5.1875e-11	-5.53125e-11	-5.90625e-11	-6.34375e-11	-6.21875e-11	-6.21875e-11	-5.75e-11	-6.84375e-11	-6.09375e-11		-4.03125e-11	-3.9375e-11	-4.03125e-11	-3.8125e-11	-4.40625e-11	-4.0625e-11	-3.75e-11	-4.875e-11	-4.21875e-11	-3.96875e-11	-4.03125e-11	-4.21875e-11	-3.53125e-11
-7.25e-11	-6.96875e-11	-7.15625e-11	-6.34375e-11	-5.53125e-11	-5.34375e-11	-5.21875e-11	-6.09375e-11	-5.6875e-11	-6.03125e-11	-5.71875e-11	-7.1875e-11	-6.125e-11		-4.59375e-11	-4.21875e-11	-3.59375e-11	-3.78125e-11	-4.0625e-11	-3.71875e-11	-3.8125e-11	-4.53125e-11	-3.9375e-11	-3.78125e-11	-3.96875e-11	-3.46875e-11	-4.34375e-11
-7.5625e-11	-6.8125e-11	-6.78125e-11	-5.625e-11	-5.15625e-11	-5.75e-11	-5.65625e-11	-6.5e-11	-6.46875e-11	-5.9375e-11	-5.90625e-11	-6.125e-11	-6.25e-11		-4.34375e-11	-4.34375e-11	-4.25e-11	-3.28125e-11	-4.875e-11	-3.78125e-11	-3.84375e-11	-4.0625e-11	-4.09375e-11	-3.75e-11	-3.90625e-11	-3.0625e-11	-4.15625e-11
-7.375e-11	-6.5625e-11	-6.40625e-11	-5.71875e-11	-4.96875e-11	-5.90625e-11	-5.53125e-11	-6.5e-11	-6.3125e-11	-5.96875e-11	-5.40625e-11	-6.53125e-11	-5.6875e-11		-4.28125e-11	-4.65625e-11	-4.59375e-11	-4.03125e-11	-4.125e-11	-4.03125e-11	-4.0625e-11	-4.15625e-11	-4.09375e-11	-4.0625e-11	-3.5e-11	-3.8125e-11	-3.78125e-11
-6.96875e-11	-6.71875e-11	-6.5e-11	-6.09375e-11	-5.125e-11	-5.71875e-11	-5.28125e-11	-6.46875e-11	-6.53125e-11	-5.46875e-11	-6.03125e-11	-6.5625e-11	-6.46875e-11		-4.25e-11	-4.28125e-11	-4.40625e-11	-4.625e-11	-4e-11	-4.375e-11	-3.78125e-11	-5.03125e-11	-4.34375e-11	-4.40625e-11	-3.65625e-11	-4.53125e-11	-3.28125e-11
-7.5625e-11	-6.875e-11	-6.75e-11	-6.03125e-11	-5.5625e-11	-6.1875e-11	-5.59375e-11	-6.34375e-11	-7.28125e-11	-5.4375e-11	-6.28125e-11	-6.15625e-11	-5.21875e-11		-4.46875e-11	-3.9375e-11	-4.375e-11	-4.53125e-11	-4.1875e-11	-4.21875e-11	-4.4375e-11	-4.8125e-11	-4.0625e-11	-4.03125e-11	-4.125e-11	-4.25e-11	-3.5e-11
-7.3125e-11	-6.21875e-11	-7.0625e-11	-6.5e-11	-4.5e-11	-6.0625e-11	-5.03125e-11	-6.03125e-11	-6.625e-11	-4.96875e-11	-6.03125e-11	-7.09375e-11	-5.65625e-11		-4.78125e-11	-4.46875e-11	-4.40625e-11	-3.65625e-11	-4.1875e-11	-4.34375e-11	-4.3125e-11	-4.53125e-11	-4.15625e-11	-3.53125e-11	-4.15625e-11	-3.875e-11	-3.75e-11
-7.9375e-11	-7e-11	-7.09375e-11	-6.375e-11	-5.21875e-11	-6.34375e-11	-5.1875e-11	-5.875e-11	-6.375e-11	-5.5625e-11	-6.59375e-11	-6.125e-11	-6.0625e-11		-4.40625e-11	-4.53125e-11	-4.34375e-11	-4.0625e-11	-4.34375e-11	-4.28125e-11	-3.53125e-11	-3.9375e-11	-3.78125e-11	-3.78125e-11	-4.34375e-11	-3.71875e-11	-3.46875e-11
-7.875e-11	-6.0625e-11	-7e-11	-6.4375e-11	-5.1875e-11	-5.8125e-11	-5.53125e-11	-6.28125e-11	-6.46875e-11	-5.96875e-11	-5.4375e-11	-6.46875e-11	-5.28125e-11		-4.34375e-11	-4.34375e-11	-4.5625e-11	-4.25e-11	-4.65625e-11	-4.1875e-11	-3.8125e-11	-3.6875e-11	-4.03125e-11	-4.375e-11	-4.4375e-11	-3.875e-11	-3.3125e-11
-7.40625e-11	-6.84375e-11	-7.1875e-11	-6.59375e-11	-5.4375e-11	-5.875e-11	-5.9375e-11	-5.15625e-11	-6.28125e-11	-5.71875e-11	-5.96875e-11	-6.5e-11	-5.78125e-11		-4.28125e-11	-4.65625e-11	-4.03125e-11	-4.3125e-11	-4.59375e-11	-4.34375e-11	-4.5625e-11	-4.15625e-11	-3.59375e-11	-4.25e-11	-4e-11	-3.875e-11	-3.71875e-11
-6.5625e-11	-5.65625e-11	-6.5e-11	-6.59375e-11	-5.3125e-11	-5.78125e-11	-5.40625e-11	-6.40625e-11	-6.59375e-11	-5.5e-11	-6.09375e-11	-5.84375e-11	-5.90625e-11		-4.28125e-11	-4.5625e-11	-3.8125e-11	-4.40625e-11	-3.9375e-11	-4.15625e-11	-4.375e-11	-4.375e-11	-3.96875e-11	-3.9375e-11	-3.9375e-11	-3.53125e-11	-4.0625e-11
-7.0625e-11	-6.125e-11	-6.28125e-11	-5.90625e-11	-5.46875e-11	-5.5e-11	-5.8125e-11	-6.25e-11	-6.46875e-11	-6.40625e-11	-5.4375e-11	-6.75e-11	-5.75e-11		-4.5e-11	-4.28125e-11	-3.65625e-11	-4.5e-11	-4.15625e-11	-4.15625e-11	-4.1875e-11	-4.125e-11	-4.46875e-11	-3.59375e-11	-3.65625e-11	-3.28125e-11	-3.6875e-11
-7.75e-11	-6.28125e-11	-6.46875e-11	-5.59375e-11	-5.15625e-11	-6.34375e-11	-5.84375e-11	-6.09375e-11	-6.78125e-11	-5.90625e-11	-6.46875e-11	-5.9375e-11	-6.4375e-11		-4.375e-11	-4.4375e-11	-3.6875e-11	-4.34375e-11	-4.28125e-11	-4.1875e-11	-4.1875e-11	-3.9375e-11	-4.53125e-11	-4.09375e-11	-3.96875e-11	-3.625e-11	-3.8125e-11
-8.15625e-11	-6.9375e-11	-6.84375e-11	-6.65625e-11	-5.15625e-11	-5.75e-11	-5.71875e-11	-5.78125e-11	-6.78125e-11	-5.65625e-11	-5.78125e-11	-6.3125e-11	-6.09375e-11		-3.8125e-11	-3.90625e-11	-3.90625e-11	-4.125e-11	-4.40625e-11	-4.21875e-11	-4.21875e-11	-4.03125e-11	-4.28125e-11	-4.40625e-11	-3.8125e-11	-3.34375e-11	-3.28125e-11
-7.21875e-11	-6.6875e-11	-6.8125e-11	-6.5e-11	-5.3125e-11	-5.40625e-11	-5.90625e-11	-6.3125e-11	-6.25e-11	-5.53125e-11	-5.65625e-11	-6.40625e-11	-5.9375e-11		-4.46875e-11	-3.78125e-11	-4.09375e-11	-4.03125e-11	-4.09375e-11	-4.03125e-11	-3.78125e-11	-4.09375e-11	-4.46875e-11	-3.84375e-11	-3.65625e-11	-3.5625e-11	-3.34375e-11
-7.34375e-11	-5.8125e-11	-6.9375e-11	-6e-11	-5.40625e-11	-6.1875e-11	-6.28125e-11	-5.5e-11	-6.40625e-11	-6.09375e-11	-5.40625e-11	-6.84375e-11	-6.5e-11		-3.9375e-11	-3.9375e-11	-4.375e-11	-4.1875e-11	-4.1875e-11	-4.1875e-11	-3.90625e-11	-3.90625e-11	-4.28125e-11	-3.84375e-11	-3.90625e-11	-3.65625e-11	-3.3125e-11
-7.65625e-11	-6.375e-11	-7.03125e-11	-6.46875e-11	-5e-11	-5.65625e-11	-5.53125e-11	-5.25e-11	-6.5625e-11	-5.53125e-11	-6.03125e-11	-6.53125e-11	-6.0625e-11		-3.6875e-11	-4.46875e-11	-4.53125e-11	-4.5e-11	-4.0625e-11	-4.28125e-11	-3.90625e-11	-4.0625e-11	-4.40625e-11	-4.09375e-11	-4.28125e-11	-3.5e-11	-3.53125e-11
-7.3125e-11	-6.46875e-11	-7.53125e-11	-6.4375e-11	-5.75e-11	-6.09375e-11	-5.53125e-11	-6.21875e-11	-7.1875e-11	-5.96875e-11	-5.875e-11	-6.125e-11	-5.625e-11		-4.03125e-11	-4.34375e-11	-4.5e-11	-4.4375e-11	-3.96875e-11	-4.03125e-11	-3.8125e-11	-3.90625e-11	-4.34375e-11	-3.8125e-11	-3.84375e-11	-3.5625e-11	-3.5e-11
-7.3125e-11	-6.40625e-11	-6.4375e-11	-5.9375e-11	-4.84375e-11	-5.4375e-11	-5.96875e-11	-6.21875e-11	-6.96875e-11	-5.3125e-11	-5.6875e-11	-6.625e-11	-5.375e-11		-4.8125e-11	-4.15625e-11	-4.3125e-11	-4.78125e-11	-4.46875e-11	-4.15625e-11	-4.1875e-11	-4.15625e-11	-3.96875e-11	-4.03125e-11	-3.78125e-11	-3.5e-11	-3.8125e-11
-7.15625e-11	-6.3125e-11	-6.78125e-11	-6.15625e-11	-5.34375e-11	-5.5625e-11	-5.65625e-11	-6.09375e-11	-6.28125e-11	-5.875e-11	-6.3125e-11	-7.28125e-11	-5.90625e-11		-4.71875e-11	-4.15625e-11	-4.625e-11	-4.5e-11	-4.03125e-11	-4.03125e-11	-4.28125e-11	-4.71875e-11	-3.75e-11	-3.84375e-11	-3.53125e-11	-3.90625e-11	-3.78125e-11
-7.375e-11	-6.59375e-11	-7.40625e-11	-6.3125e-11	-5.28125e-11	-6.21875e-11	-6e-11	-6.03125e-11	-6.34375e-11	-5.9375e-11	-5.1875e-11	-6.5625e-11	-6.4375e-11		-4.28125e-11	-4.40625e-11	-4.75e-11	-3.875e-11	-4.8125e-11	-4.03125e-11	-4.03125e-11	-4.34375e-11	-3.90625e-11	-3.84375e-11	-3.8125e-11	-4.03125e-11	-4.03125e-11
-7.28125e-11	-6.4375e-11	-6.5e-11	-6.5625e-11	-5.15625e-11	-6.0625e-11	-5.46875e-11	-6.4375e-11	-5.84375e-11	-6.15625e-11	-6.03125e-11	-6.65625e-11	-5.5e-11		-4.34375e-11	-4.6875e-11	-4.34375e-11	-3.84375e-11	-4.15625e-11	-4.03125e-11	-4.3125e-11	-4.75e-11	-4.28125e-11	-4.03125e-11	-3.96875e-11	-3.65625e-11	-3.9375e-11
-7.21875e-11	-6.5e-11	-6.90625e-11	-6.09375e-11	-5.34375e-11	-6.1875e-11	-5.78125e-11	-6.34375e-11	-6.21875e-11	-5.8125e-11	-5.65625e-11	-6e-11	-6.625e-11		-4.6875e-11	-4.34375e-11	-4.65625e-11	-3.75e-11	-4.40625e-11	-3.9375e-11	-4.03125e-11	-4.625e-11	-4.03125e-11	-4.34375e-11	-4.03125e-11	-3.34375e-11	-3.78125e-11
-7.46875e-11	-6.1875e-11	-6.3125e-11	-6.21875e-11	-5.1875e-11	-5.78125e-11	-5.53125e-11	-6.3125e-11	-6.34375e-11	-5.4375e-11	-6.90625e-11	-6.21875e-11	-6.03125e-11		-4.5e-11	-4.15625e-11	-4.15625e-11	-4.5625e-11	-3.75e-11	-3.90625e-11	-4.34375e-11	-4.59375e-11	-3.59375e-11	-3.90625e-11	-3.84375e-11	-3.375e-11	-3.5e-11
-7.46875e-11	-6.4375e-11	-7.28125e-11	-6e-11	-5.3125e-11	-5.90625e-11	-5.53125e-11	-6.5e-11	-5.71875e-11	-5.84375e-11	-6e-11	-6.8125e-11	-5.96875e-11		-4.21875e-11	-4.3125e-11	-4.28125e-11	-4.34375e-11	-3.53125e-11	-4.59375e-11	-4.5e-11	-4.03125e-11	-4.03125e-11	-4.03125e-11	-4.28125e-11	-3.71875e-11	-3.9375e-11
-7.34375e-11	-7e-11	-6.53125e-11	-6.46875e-11	-5.5625e-11	-6.28125e-11	-6.125e-11	-6.1875e-11	-6.1875e-11	-5.78125e-11	-5.96875e-11	-5.84375e-11	-6.375e-11		-3.96875e-11	-4.15625e-11	-4.25e-11	-3.9375e-11	-3.59375e-11	-4.21875e-11	-4.09375e-11	-3.96875e-11	-3.96875e-11	-4.03125e-11	-4.03125e-11	-3.8125e-11	-4.28125e-11
-7.8125e-11	-6.9375e-11	-6.75e-11	-5.9375e-11	-5.40625e-11	-5.53125e-11	-5.84375e-11	-6.40625e-11	-6.09375e-11	-5.21875e-11	-5.625e-11	-6.5e-11	-5.8125e-11		-4.40625e-11	-4.09375e-11	-4.03125e-11	-3.53125e-11	-4.09375e-11	-4.375e-11	-3.625e-11	-4.40625e-11	-3.6875e-11	-3.90625e-11	-4.25e-11	-3.78125e-11	-3.9375e-11
-7.875e-11	-6.53125e-11	-6.78125e-11	-6.15625e-11	-5.5625e-11	-5.8125e-11	-5.8125e-11	-6.21875e-11	-6.0625e-11	-5.71875e-11	-6.03125e-11	-6.625e-11	-5.5625e-11		-4.375e-11	-4.28125e-11	-4.0625e-11	-4.125e-11	-4.5e-11	-4.09375e-11	-3.5625e-11	-4.1875e-11	-4.0625e-11	-3.46875e-11	-4.28125e-11	-4.15625e-11	-3.9375e-11
-7.09375e-11	-6.875e-11	-6.84375e-11	-6.3125e-11	-5.28125e-11	-6.4375e-11	-5.6875e-11	-6.84375e-11	-6.21875e-11	-5.625e-11	-5.5625e-11	-6.40625e-11	-6.40625e-11		-4.34375e-11	-4.46875e-11	-4.0625e-11	-4.65625e-11	-4.15625e-11	-3.90625e-11	-4.5e-11	-4.03125e-11	-4.34375e-11	-3.53125e-11	-4.03125e-11	-4.375e-11	-4.21875e-11
-7.4375e-11	-7.09375e-11	-6.78125e-11	-6.71875e-11	-5.1875e-11	-5.34375e-11	-6.3125e-11	-6.28125e-11	-6.46875e-11	-5.03125e-11	-6.09375e-11	-5.78125e-11	-6.46875e-11		-4.25e-11	-4.5e-11	-4.40625e-11	-4.9375e-11	-4.0625e-11	-3.9375e-11	-4.34375e-11	-4.5e-11	-4.53125e-11	-3.78125e-11	-3.625e-11	-4.03125e-11	-3.78125e-11
-7.5e-11	-6.4375e-11	-7.34375e-11	-6.71875e-11	-5.3125e-11	-6.3125e-11	-5.03125e-11	-6.4375e-11	-6.375e-11	-5.75e-11	-6.53125e-11	-6.34375e-11	-5.03125e-11		-4.03125e-11	-4.21875e-11	-3.9375e-11	-3.9375e-11	-4.15625e-11	-4.21875e-11	-4.09375e-11	-4.03125e-11	-4.03125e-11	-3.9375e-11	-3.40625e-11	-4.03125e-11	-3.78125e-11
-8.09375e-11	-6.5e-11	-6.21875e-11	-5.90625e-11	-5.03125e-11	-6e-11	-5.40625e-11	-6.53125e-11	-6.8125e-11	-5.71875e-11	-5.96875e-11	-6.28125e-11	-5.78125e-11		-4.21875e-11	-4.0625e-11	-3.9375e-11	-4.15625e-11	-4.78125e-11	-3.71875e-11	-4.5e-11	-4.125e-11	-3.59375e-11	-3.8125e-11	-3.71875e-11	-3.625e-11	-4e-11
-6.78125e-11	-7e-11	-7.75e-11	-5.96875e-11	-5.78125e-11	-5.625e-11	-5.9375e-11	-6.1875e-11	-6.5e-11	-5.46875e-11	-6.28125e-11	-6.625e-11	-6.03125e-11		-4.4375e-11	-4.21875e-11	-3.625e-11	-4.1875e-11	-4.125e-11	-3.84375e-11	-4.5e-11	-4.09375e-11	-3.9375e-11	-3.40625e-11	-3.8125e-11	-3.03125e-11	-3.84375e-11
-7.5e-11	-6.96875e-11	-6.59375e-11	-5.84375e-11	-5.65625e-11	-6.71875e-11	-5e-11	-6.8125e-11	-6.625e-11	-5.71875e-11	-5.6875e-11	-6.6875e-11	-6.15625e-11		-4.125e-11	-3.78125e-11	-3.65625e-11	-3.71875e-11	-4.21875e-11	-4.15625e-11	-3.84375e-11	-4.125e-11	-4.28125e-11	-3.53125e-11	-4.03125e-11	-3.03125e-11	-3.71875e-11
-7.84375e-11	-6.5e-11	-7.3125e-11	-5.9375e-11	-5.4375e-11	-5.9375e-11	-5.875e-11	-5.75e-11	-6.375e-11	-5.125e-11	-5.4375e-11	-6.28125e-11	-5.9375e-11		-4.46875e-11	-4.03125e-11	-4.5625e-11	-4.46875e-11	-4.09375e-11	-3.84375e-11	-3.78125e-11	-4.0625e-11	-4.0625e-11	-4.0625e-11	-3.90625e-11	-3.5e-11	-3.625e-11
-7.15625e-11	-6.9375e-11	-7.21875e-11	-6.21875e-11	-5.46875e-11	-6.34375e-11	-5.3125e-11	-6.03125e-11	-6.40625e-11	-5.3125e-11	-5.875e-11	-5.71875e-11	-5.90625e-11		-4.09375e-11	-4.28125e-11	-4.53125e-11	-4.5e-11	-4.125e-11	-4.3125e-11	-4.625e-11	-3.9375e-11	-5.03125e-11	-3.96875e-11	-4.03125e-11	-4.15625e-11	-3.75e-11
-7.53125e-11	-7.21875e-11	-7.0625e-11	-5.3125e-11	-5.53125e-11	-5.78125e-11	-5.25e-11	-6.90625e-11	-6.4375e-11	-5.125e-11	-5.34375e-11	-6.65625e-11	-5.84375e-11		-3.6875e-11	-4.625e-11	-4.34375e-11	-4.53125e-11	-4.0625e-11	-4.15625e-11	-4.28125e-11	-3.40625e-11	-4.28125e-11	-4.40625e-11	-4.03125e-11	-3.84375e-11	-3.9375e-11
-7.8125e-11	-6.65625e-11	-6.75e-11	-6.125e-11	-5.15625e-11	-6.53125e-11	-5.78125e-11	-5.4375e-11	-6.84375e-11	-6.0625e-11	-6.625e-11	-6.15625e-11	-5.46875e-11		-4.03125e-11	-4.53125e-11	-4.28125e-11	-4.4375e-11	-4.25e-11	-4.03125e-11	-4.34375e-11	-4.15625e-11	-4.0625e-11	-4.15625e-11	-3.9375e-11	-3.59375e-11	-3.84375e-11
-7.75e-11	-6.625e-11	-7e-11	-6.15625e-11	-5.6875e-11	-6.03125e-11	-5.65625e-11	-6.53125e-11	-7e-11	-5.65625e-11	-6.15625e-11	-6.34375e-11	-5.90625e-11		-3.8125e-11	-4.84375e-11	-4.5625e-11	-3.75e-11	-4.15625e-11	-3.90625e-11	-4.09375e-11	-4.78125e-11	-4.03125e-11	-3.65625e-11	-4.1875e-11	-3.5e-11	-3.53125e-11
-7.25e-11	-6.875e-11	-6.6875e-11	-6.5e-11	-5.28125e-11	-5.96875e-11	-5.90625e-11	-6e-11	-7.15625e-11	-6.1875e-11	-5.6875e-11	-6.375e-11	-5.6875e-11		-3.6875e-11	-4.4375e-11	-4.34375e-11	-3.9375e-11	-4.03125e-11	-4.25e-11	-4.03125e-11	-4.53125e-11	-4.125e-11	-4.03125e-11	-4.03125e-11	-3.78125e-11	-3.5e-11
-7.65625e-11	-6.28125e-11	-6.46875e-11	-5.59375e-11	-4.78125e-11	-6.21875e-11	-5.59375e-11	-6.34375e-11	-6.40625e-11	-5.71875e-11	-6e-11	-7.3125e-11	-6.03125e-11		-3.78125e-11	-4.28125e-11	-4.21875e-11	-4.40625e-11	-4.03125e-11	-4.625e-11	-4.1875e-11	-4.40625e-11	-4.4375e-11	-4.375e-11	-3.6875e-11	-3.6875e-11	-3.9375e-11
-8.40625e-11	-6.5e-11	-7.1875e-11	-5.59375e-11	-6.34375e-11	-6.59375e-11	-6.15625e-11	-5.78125e-11	-6.09375e-11	-5.71875e-11	-5.84375e-11	-6.53125e-11	-5.90625e-11		-4.65625e-11	-4.5e-11	-4.5e-11	-3.90625e-11	-4.28125e-11	-4.1875e-11	-4.125e-11	-4.28125e-11	-4.5625e-11	-4.21875e-11	-4.21875e-11	-3.78125e-11	-3.625e-11
-7.5625e-11	-6.59375e-11	-6.46875e-11	-6.875e-11	-5.90625e-11	-6.21875e-11	-6.28125e-11	-6.78125e-11	-7.375e-11	-5.65625e-11	-5.34375e-11	-6.1875e-11	-5.625e-11		-4.9375e-11	-4.875e-11	-4.53125e-11	-3.78125e-11	-4.375e-11	-4.0625e-11	-3.6875e-11	-3.875e-11	-3.84375e-11	-4.15625e-11	-3.875e-11	-3.78125e-11	-4.125e-11
-7.65625e-11	-6.9375e-11	-6.8125e-11	-5.90625e-11	-5.53125e-11	-6.1875e-11	-5.65625e-11	-6.40625e-11	-6.59375e-11	-5.9375e-11	-5.875e-11	-6.90625e-11	-6.375e-11		-4.59375e-11	-4.5e-11	-4.1875e-11	-4.28125e-11	-4.5e-11	-3.9375e-11	-3.8125e-11	-4.03125e-11	-3.34375e-11	-4.03125e-11	-3.03125e-11	-3.3125e-11	-3.4375e-11
-7.78125e-11	-7e-11	-6.25e-11	-6.25e-11	-6.09375e-11	-6.03125e-11	-5.84375e-11	-6.4375e-11	-6.125e-11	-6.46875e-11	-5.75e-11	-6.53125e-11	-5.46875e-11		-4.15625e-11	-4.5625e-11	-4.03125e-11	-4.28125e-11	-4.5e-11	-3.8125e-11	-3.71875e-11	-4.46875e-11	-3.875e-11	-3.5e-11	-3.125e-11	-3.34375e-11	-3.59375e-11
-7.65625e-11	-7.0625e-11	-7.0625e-11	-5.9375e-11	-5.28125e-11	-5.5e-11	-6.65625e-11	-5.75e-11	-6.03125e-11	-6.0625e-11	-5.65625e-11	-6.125e-11	-5.78125e-11		-4.0625e-11	-4.53125e-11	-4.21875e-11	-4.4375e-11	-4.21875e-11	-4.03125e-11	-4.375e-11	-4.34375e-11	-3.78125e-11	-3.75e-11	-3.5625e-11	-3.6875e-11	-4.21875e-11
-7.65625e-11	-6.65625e-11	-7.03125e-11	-5.59375e-11	-5.09375e-11	-5.5e-11	-5.78125e-11	-6.34375e-11	-6.53125e-11	-6.5625e-11	-6.34375e-11	-6.40625e-11	-5.5e-11		-4.0625e-11	-5e-11	-4.65625e-11	-4.71875e-11	-4.03125e-11	-4.375e-11	-4.6875e-11	-4.84375e-11	-4.03125e-11	-4.40625e-11	-4.125e-11	-4.28125e-11	-4.03125e-11
-7.78125e-11	-6.96875e-11	-6.4375e-11	-5.15625e-11	-5.8125e-11	-6.125e-11	-5.5e-11	-5.84375e-11	-7.03125e-11	-5.46875e-11	-5.03125e-11	-6.28125e-11	-5.59375e-11		-3.84375e-11	-4.3125e-11	-4.59375e-11	-4.4375e-11	-4.28125e-11	-4.53125e-11	-4.25e-11	-4.3125e-11	-4.03125e-11	-4.1875e-11	-4.15625e-11	-4.09375e-11	-3.9375e-11
-7.28125e-11	-6.28125e-11	-6.53125e-11	-6.3125e-11	-5.375e-11	-5.84375e-11	-5.46875e-11	-6.25e-11	-6.78125e-11	-6.1875e-11	-5.875e-11	-6.53125e-11	-6.4375e-11		-4.28125e-11	-4.03125e-11	-4.15625e-11	-4.15625e-11	-4.09375e-11	-4.625e-11	-4.03125e-11	-4.25e-11	-4.21875e-11	-3.6875e-11	-4.03125e-11	-3.6875e-11	-3.65625e-11
-7.4375e-11	-7.03125e-11	-6.65625e-11	-6.21875e-11	-5.09375e-11	-6.5e-11	-5.78125e-11	-6.40625e-11	-6.9375e-11	-6.9375e-11	-5.84375e-11	-6.5625e-11	-5.6875e-11		-3.9375e-11	-4.1875e-11	-4.28125e-11	-4.28125e-11	-3.5625e-11	-4.53125e-11	-3.71875e-11	-3.90625e-11	-3.78125e-11	-3.21875e-11	-4.125e-11	-3.4375e-11	-3.65625e-11
-7.5e-11	-6.59375e-11	-7.125e-11	-6.125e-11	-6.40625e-11	-6.21875e-11	-5.59375e-11	-5.71875e-11	-6.4375e-11	-5.78125e-11	-5.34375e-11	-6.46875e-11	-5.90625e-11		-4.03125e-11	-4.125e-11	-3.9375e-11	-4.1875e-11	-3.90625e-11	-3.90625e-11	-4.15625e-11	-3.875e-11	-4.5e-11	-3.21875e-11	-4.0625e-11	-3.71875e-11	-3.75e-11
-7.28125e-11	-7.1875e-11	-6.59375e-11	-5.71875e-11	-5.5e-11	-5.90625e-11	-5.625e-11	-6.375e-11	-6.6875e-11	-5.875e-11	-5.5625e-11	-6.21875e-11	-6.0625e-11		-5.0625e-11	-3.875e-11	-3.78125e-11	-4.1875e-11	-4.15625e-11	-3.78125e-11	-4.4375e-11	-4.1875e-11	-4.28125e-11	-3.90625e-11	-4.03125e-11	-4.0625e-11	-4.03125e-11
-7.375e-11	-6.375e-11	-6.59375e-11	-5.625e-11	-5.96875e-11	-6.40625e-11	-6.1875e-11	-6.71875e-11	-6.03125e-11	-6.53125e-11	-5.46875e-11	-7.09375e-11	-5.875e-11		-5.09375e-11	-4.03125e-11	-4.15625e-11	-4.34375e-11	-4.46875e-11	-3.78125e-11	-4.125e-11	-4.25e-11	-3.75e-11	-4.25e-11	-3.65625e-11	-4.46875e-11	-3.59375e-11
-7.4375e-11	-6.84375e-11	-6.8125e-11	-5.53125e-11	-6.28125e-11	-6.03125e-11	-4.71875e-11	-6.375e-11	-6.625e-11	-6.5e-11	-6.3125e-11	-5.65625e-11	-5.75e-11		-4.40625e-11	-4.03125e-11	-4.03125e-11	-4.15625e-11	-4.46875e-11	-3.84375e-11	-3.90625e-11	-4.21875e-11	-3.53125e-11	-4.28125e-11	-3.5625e-11	-3.5e-11	-3.65625e-11
-7.21875e-11	-6.84375e-11	-6.34375e-11	-6.03125e-11	-5.5e-11	-6.15625e-11	-6.15625e-11	-5.9375e-11	-6.03125e-11	-6.28125e-11	-5.71875e-11	-5.96875e-11	-5.4375e-11		-4.28125e-11	-4.375e-11	-4.09375e-11	-4.21875e-11	-4.125e-11	-4.28125e-11	-4.4375e-11	-4.375e-11	-4.15625e-11	-4.40625e-11	-4.03125e-11	-3.25e-11	-3.78125e-11
-8.21875e-11	-7.25e-11	-6.1875e-11	-6.375e-11	-5.53125e-11	-6.03125e-11	-5.53125e-11	-6.375e-11	-6.4375e-11	-5.90625e-11	-6.15625e-11	-6.25e-11	-5.78125e-11		-4.75e-11	-4.78125e-11	-4.40625e-11	-3.84375e-11	-3.9375e-11	-4.40625e-11	-4.3125e-11	-4.28125e-11	-4.3125e-11	-4.09375e-11	-4.03125e-11	-3.5e-11	-3.71875e-11
-6.71875e-11	-6.84375e-11	-6.65625e-11	-5.875e-11	-5.03125e-11	-5.46875e-11	-5.84375e-11	-6.28125e-11	-6.15625e-11	-5.6875e-11	-5.15625e-11	-6.03125e-11	-5.40625e-11		-4.65625e-11	-4.4375e-11	-4.25e-11	-3.8125e-11	-4.125e-11	-4.5e-11	-4.34375e-11	-4.34375e-11	-4.3125e-11	-4.15625e-11	-3.90625e-11	-3.78125e-11	-3.59375e-11
-7.40625e-11	-7.15625e-11	-7.125e-11	-5.71875e-11	-5.46875e-11	-6.09375e-11	-5.5e-11	-7.0625e-11	-7.375e-11	-5.1875e-11	-6.59375e-11	-6.34375e-11	-5.59375e-11		-3.875e-11	-3.8125e-11	-4.28125e-11	-3.96875e-11	-4.3125e-11	-4.40625e-11	-4.40625e-11	-4.53125e-11	-3.84375e-11	-4.28125e-11	-3.96875e-11	-3.46875e-11	-4.375e-11
-7.4375e-11	-7.09375e-11	-6.90625e-11	-5.9375e-11	-5.625e-11	-5.65625e-11	-5.71875e-11	-6.3125e-11	-6.15625e-11	-5.6875e-11	-5.6875e-11	-7.15625e-11	-5.78125e-11		-4.1875e-11	-3.90625e-11	-4.03125e-11	-4.15625e-11	-4.5e-11	-4.28125e-11	-4.34375e-11	-4.5625e-11	-3.9375e-11	-3.5e-11	-4.15625e-11	-3.53125e-11	-4.125e-11
-7.03125e-11	-7.21875e-11	-6.15625e-11	-6.4375e-11	-5.65625e-11	-5.90625e-11	-6.0625e-11	-6.09375e-11	-6.46875e-11	-6e-11	-6.15625e-11	-6.71875e-11	-5.5e-11		-4.40625e-11	-4.03125e-11	-4.4375e-11	-4.15625e-11	-4.46875e-11	-4.1875e-11	-3.90625e-11	-4.09375e-11	-4.25e-11	-3.53125e-11	-4.53125e-11	-3.6875e-11	-3.65625e-11
-7.1875e-11	-7.0625e-11	-6.65625e-11	-5.84375e-11	-5.28125e-11	-6.65625e-11	-5.15625e-11	-5.78125e-11	-6.21875e-11	-5.90625e-11	-5.84375e-11	-6.34375e-11	-5.9375e-11		-4.1875e-11	-4.71875e-11	-4.59375e-11	-4.1875e-11	-4.5e-11	-4.09375e-11	-3.9375e-11	-3.71875e-11	-3.78125e-11	-3.84375e-11	-3.6875e-11	-3.46875e-11	-3.59375e-11
-7.5625e-11	-6.1875e-11	-6.6875e-11	-5.90625e-11	-5.15625e-11	-5.21875e-11	-5.65625e-11	-6.46875e-11	-6.28125e-11	-6e-11	-5.71875e-11	-6.6875e-11	-5.875e-11		-4.34375e-11	-4.65625e-11	-5e-11	-4.40625e-11	-4.1875e-11	-3.71875e-11	-3.96875e-11	-4.375e-11	-4.28125e-11	-4.03125e-11	-3.5625e-11	-3.15625e-11	-4.15625e-11
-7.71875e-11	-6.21875e-11	-6.46875e-11	-5.625e-11	-5.34375e-11	-6.3125e-11	-6.5e-11	-5.59375e-11	-7.125e-11	-6.0625e-11	-5.5e-11	-7.21875e-11	-5.71875e-11		-4.59375e-11	-4.375e-11	-4.1875e-11	-4.09375e-11	-4.03125e-11	-3.46875e-11	-4.25e-11	-4.15625e-11	-4.09375e-11	-3.9375e-11	-4.03125e-11	-3.875e-11	-3.65625e-11
-7.1875e-11	-6.375e-11	-6.53125e-11	-6.125e-11	-5.5e-11	-7.1875e-11	-5.5625e-11	-6.875e-11	-6.03125e-11	-5.875e-11	-5.71875e-11	-6.71875e-11	-5.71875e-11		-4.3125e-11	-4.25e-11	-4.5e-11	-4.03125e-11	-4.3125e-11	-4.65625e-11	-4.09375e-11	-4.125e-11	-4.03125e-11	-4.15625e-11	-4.09375e-11	-4.1875e-11	-3.6875e-11
-7.3125e-11	-6.6875e-11	-6.65625e-11	-5.375e-11	-5.21875e-11	-6.84375e-11	-5.875e-11	-5.84375e-11	-5.6875e-11	-6.5e-11	-6.34375e-11	-6.09375e-11	-6.15625e-11		-4.375e-11	-4.34375e-11	-4.21875e-11	-4.03125e-11	-4.21875e-11	-3.96875e-11	-4.03125e-11	-4.65625e-11	-4.28125e-11	-3.625e-11	-4.15625e-11	-3.46875e-11	-4.78125e-11
-7.03125e-11	-6.4375e-11	-6.09375e-11	-5.59375e-11	-5.28125e-11	-6.9375e-11	-6.5625e-11	-5.96875e-11	-5.8125e-11	-6.28125e-11	-6.8125e-11	-7.125e-11	-5.5625e-11		-4.96875e-11	-4.28125e-11	-4.40625e-11	-4.09375e-11	-3.875e-11	-4.125e-11	-4.21875e-11	-4.15625e-11	-4.0625e-11	-4.09375e-11	-3.9375e-11	-4e-11	-4.03125e-11
-7.3125e-11	-7.25e-11	-6.96875e-11	-6.3125e-11	-5.53125e-11	-6.21875e-11	-5.8125e-11	-6.5e-11	-6.03125e-11	-5.9375e-11	-5.59375e-11	-6.65625e-11	-6.34375e-11		-4.46875e-11	-4.375e-11	-3.84375e-11	-4.03125e-11	-4.125e-11	-4.25e-11	-4.09375e-11	-3.96875e-11	-4.09375e-11	-4.4375e-11	-4.40625e-11	-4.1875e-11	-3.8125e-11
-7.3125e-11	-6.0625e-11	-5.8125e-11	-5.46875e-11	-5.5e-11	-5.84375e-11	-5.28125e-11	-5.9375e-11	-6.71875e-11	-5.875e-11	-5.6875e-11	-6.15625e-11	-5.84375e-11		-4.34375e-11	-4.09375e-11	-4.15625e-11	-4.34375e-11	-4.28125e-11	-3.46875e-11	-4.375e-11	-3.84375e-11	-3.75e-11	-3.625e-11	-3.96875e-11	-3.71875e-11	-3.84375e-11
-7.71875e-11	-6.5e-11	-6.59375e-11	-5.6875e-11	-5.21875e-11	-5.9375e-11	-6.15625e-11	-5.9375e-11	-6.46875e-11	-5.28125e-11	-5.125e-11	-6.4375e-11	-5.75e-11		-4.21875e-11	-3.6875e-11	-4.53125e-11	-4.09375e-11	-4.15625e-11	-4.09375e-11	-4.03125e-11	-4.34375e-11	-3.71875e-11	-3.625e-11	-3.53125e-11	-3.6875e-11	-4.09375e-11
-7.15625e-11	-5.875e-11	-6.625e-11	-5.59375e-11	-5.5e-11	-6.09375e-11	-6.21875e-11	-5.9375e-11	-6.09375e-11	-5.53125e-11	-6.03125e-11	-7e-11	-6e-11		-4.375e-11	-3.96875e-11	-4.96875e-11	-4.03125e-11	-3.96875e-11	-4.21875e-11	-4.59375e-11	-4.46875e-11	-4.4375e-11	-3.84375e-11	-4.03125e-11	-3.5625e-11	-4.1875e-11
-7.8125e-11	-6.5625e-11	-6.65625e-11	-6.0625e-11	-5.125e-11	-6.15625e-11	-5.71875e-11	-5.0625e-11	-6.21875e-11	-6e-11	-6.09375e-11	-6.90625e-11	-5.9375e-11		-4.0625e-11	-4.46875e-11	-4.0625e-11	-3.9375e-11	-3.96875e-11	-3.8125e-11	-4.53125e-11	-4.03125e-11	-4.5e-11	-4.1875e-11	-3.96875e-11	-3.53125e-11	-3.75e-11
-7.90625e-11	-6.25e-11	-7.03125e-11	-6.28125e-11	-5.71875e-11	-5.96875e-11	-5.6875e-11	-6.09375e-11	-6.09375e-11	-5.15625e-11	-6.09375e-11	-6.4375e-11	-6.71875e-11		-4.46875e-11	-4.34375e-11	-4.09375e-11	-4.53125e-11	-4.34375e-11	-3.8125e-11	-3.84375e-11	-4.4375e-11	-4.5e-11	-4.1875e-11	-3.5625e-11	-4.03125e-11	-3.8125e-11
-7.4375e-11	-6.625e-11	-7.34375e-11	-6.21875e-11	-5.0625e-11	-6.375e-11	-5.78125e-11	-6.28125e-11	-6.8125e-11	-6.53125e-11	-5.90625e-11	-6.59375e-11	-5.9375e-11		-4.09375e-11	-4.5625e-11	-4.3125e-11	-4.125e-11	-4.03125e-11	-3.875e-11	-4.21875e-11	-4.5625e-11	-4.03125e-11	-3.53125e-11	-3.84375e-11	-3.84375e-11	-3.59375e-11
-7.3125e-11	-6.8125e-11	-6.84375e-11	-6.3125e-11	-5.09375e-11	-5.90625e-11	-5.0625e-11	-5.75e-11	-6.375e-11	-5.53125e-11	-5.8125e-11	-6.625e-11	-4.96875e-11		-4.03125e-11	-4.21875e-11	-4.53125e-11	-4.09375e-11	-4.09375e-11	-4.5e-11	-4.21875e-11	-4.5625e-11	-3.75e-11	-4.03125e-11	-3.5625e-11	-3.6875e-11	-3.5e-11
-8.15625e-11	-6.6875e-11	-6.625e-11	-5.9375e-11	-5.90625e-11	-6.125e-11	-6.0625e-11	-6.625e-11	-6.5e-11	-5.9375e-11	-5.125e-11	-6.3125e-11	-5.0625e-11		-3.875e-11	-4.46875e-11	-4.65625e-11	-3.90625e-11	-4.125e-11	-5e-11	-4.09375e-11	-4.65625e-11	-3.65625e-11	-4.3125e-11	-4.28125e-11	-3.59375e-11	-3.84375e-11
-7.15625e-11	-6.8125e-11	-6.59375e-11	-5.84375e-11	-4.59375e-11	-6.375e-11	-6.1875e-11	-6.21875e-11	-6.03125e-11	-5.53125e-11	-5.875e-11	-5.9375e-11	-5.5e-11		-3.90625e-11	-5e-11	-4.28125e-11	-4.5e-11	-4.25e-11	-4.0625e-11	-4.21875e-11	-4.40625e-11	-3.5e-11	-4.375e-11	-4.40625e-11	-3.78125e-11	-3.875e-11
-7.71875e-11	-6.78125e-11	-6.9375e-11	-5e-11	-6.1875e-11	-6.34375e-11	-6.125e-11	-5.96875e-11	-6.40625e-11	-5.21875e-11	-5.625e-11	-6.25e-11	-5.5625e-11		-4.15625e-11	-4.46875e-11	-4.59375e-11	-4.53125e-11	-4.3125e-11	-3.90625e-11	-3.96875e-11	-4.65625e-11	-3.84375e-11	-3.84375e-11	-4.1875e-11	-3.59375e-11	-3.6875e-11
-7.6875e-11	-6.8125e-11	-6.84375e-11	-5.9375e-11	-5.53125e-11	-6.59375e-11	-5.65625e-11	-6.28125e-11	-6.65625e-11	-5.40625e-11	-6.25e-11	-6.53125e-11	-6.5e-11		-3.65625e-11	-4.53125e-11	-4.4375e-11	-4.8125e-11	-4.28125e-11	-4.1875e-11	-4.125e-11	-4.03125e-11	-4.375e-11	-3.90625e-11	-3.875e-11	-3.59375e-11	-4.03125e-11
-7.59375e-11	-6.375e-11	-7.125e-11	-5.65625e-11	-5.46875e-11	-6.25e-11	-5.84375e-11	-5.65625e-11	-6.53125e-11	-5.46875e-11	-6.46875e-11	-7.21875e-11	-5.875e-11		-4.03125e-11	-4.1875e-11	-4.15625e-11	-4.03125e-11	-4.09375e-11	-4.28125e-11	-4.53125e-11	-4.0625e-11	-4.46875e-11	-3.65625e-11	-3.34375e-11	-4.03125e-11	-4.1875e-11
-7.75e-11	-6.09375e-11	-6.8125e-11	-5.8125e-11	-5.4375e-11	-6.46875e-11	-5.1875e-11	-5.34375e-11	-6.8125e-11	-5.5625e-11	-5.3125e-11	-6.5625e-11	-5.9375e-11		-4.40625e-11	-3.78125e-11	-4.375e-11	-3.90625e-11	-3.9375e-11	-4.46875e-11	-4.4375e-11	-3.875e-11	-4.15625e-11	-3.625e-11	-3.40625e-11	-3.875e-11	-4.0625e-11
-7.5625e-11	-6.4375e-11	-7.1875e-11	-6.53125e-11	-5.65625e-11	-6.53125e-11	-5.5e-11	-5.71875e-11	-6.21875e-11	-5.96875e-11	-5.65625e-11	-6.5625e-11	-6.125e-11		-4.28125e-11	-4.03125e-11	-3.8125e-11	-4.03125e-11	-4.09375e-11	-4.3125e-11	-3.84375e-11	-3.875e-11	-3.78125e-11	-3.84375e-11	-4.3125e-11	-4.09375e-11	-4.15625e-11
-7.9375e-11	-6.625e-11	-6.59375e-11	-6.5625e-11	-6.03125e-11	-6.8125e-11	-5.71875e-11	-6.3125e-11	-6e-11	-5.84375e-11	-6e-11	-6.125e-11	-5.75e-11		-4.375e-11	-4.15625e-11	-3.9375e-11	-4.34375e-11	-3.8125e-11	-4.15625e-11	-4.03125e-11	-4.0625e-11	-3.96875e-11	-3.59375e-11	-4.40625e-11	-3.65625e-11	-3.8125e-11
-7.875e-11	-6.03125e-11	-7.375e-11	-5.84375e-11	-5.875e-11	-5.53125e-11	-5.96875e-11	-6.1875e-11	-5.65625e-11	-5.5625e-11	-5.9375e-11	-6.65625e-11	-5.84375e-11		-4.40625e-11	-4.03125e-11	-4.15625e-11	-4.4375e-11	-4.28125e-11	-3.8125e-11	-4.09375e-11	-3.4375e-11	-3.65625e-11	-3.625e-11	-3.875e-11	-3.875e-11	-3.78125e-11
-6.90625e-11	-6.25e-11	-6.5625e-11	-5.96875e-11	-6.5e-11	-5.96875e-11	-5.5e-11	-5.6875e-11	-6.1875e-11	-5.875e-11	-5.65625e-11	-6.90625e-11	-6.34375e-11		-4.5625e-11	-3.84375e-11	-4.09375e-11	-4.53125e-11	-4.34375e-11	-4.09375e-11	-4.28125e-11	-3.59375e-11	-3.8125e-11	-3.90625e-11	-3.5625e-11	-3.5e-11	-3.78125e-11
-7.625e-11	-6.96875e-11	-7.03125e-11	-6.40625e-11	-5.46875e-11	-6.40625e-11	-5.65625e-11	-6.1875e-11	-6.28125e-11	-5.78125e-11	-5.28125e-11	-6.375e-11	-6.1875e-11		-4.34375e-11	-4.28125e-11	-4.34375e-11	-4.71875e-11	-4.5625e-11	-4.0625e-11	-3.78125e-11	-3.78125e-11	-4.5e-11	-4.15625e-11	-4.09375e-11	-3.75e-11	-4.3125e-11
-7.6875e-11	-7.03125e-11	-6.21875e-11	-5.6875e-11	-5.5e-11	-6.09375e-11	-5.40625e-11	-5.71875e-11	-6.15625e-11	-5.53125e-11	-5.5e-11	-6.09375e-11	-5.78125e-11		-3.78125e-11	-4.84375e-11	-4.46875e-11	-4.625e-11	-4.46875e-11	-4.46875e-11	-3.59375e-11	-4.875e-11	-4.34375e-11	-3.84375e-11	-3.71875e-11	-3.90625e-11	-4.15625e-11
-7.34375e-11	-6.6875e-11	-6.84375e-11	-6.09375e-11	-6.3125e-11	-6.53125e-11	-5.375e-11	-5.59375e-11	-6.28125e-11	-5.96875e-11	-6.40625e-11	-6.875e-11	-5.8125e-11		-4.40625e-11	-4.4375e-11	-4.5625e-11	-4.15625e-11	-4.46875e-11	-4.09375e-11	-3.625e-11	-4.6875e-11	-3.84375e-11	-4.15625e-11	-3.78125e-11	-3.75e-11	-3.84375e-11
-7.46875e-11	-6.53125e-11	-7.34375e-11	-5.40625e-11	-5.53125e-11	-6.1875e-11	-5.34375e-11	-5.5625e-11	-6.0625e-11	-6.125e-11	-6.4375e-11	-6.65625e-11	-5.625e-11		-4.625e-11	-4.5625e-11	-4.34375e-11	-4.09375e-11	-3.9375e-11	-4.3125e-11	-4.28125e-11	-4.34375e-11	-4.15625e-11	-3.875e-11	-4.5e-11	-3.28125e-11	-3.9375e-11
-7.375e-11	-6.8125e-11	-7.28125e-11	-5.59375e-11	-5.78125e-11	-6.03125e-11	-5.6875e-11	-5.28125e-11	-6.15625e-11	-6.15625e-11	-5.84375e-11	-6.125e-11	-4.96875e-11		-4.5625e-11	-4.09375e-11	-4.09375e-11	-4.09375e-11	-3.6875e-11	-4.09375e-11	-4.6875e-11	-4.65625e-11	-4.03125e-11	-3.59375e-11	-3.78125e-11	-3.4375e-11	-3.90625e-11
-7.53125e-11	-6.53125e-11	-6.625e-11	-6.25e-11	-5.34375e-11	-6.5e-11	-5.875e-11	-5.5e-11	-6.65625e-11	-5.28125e-11	-5.3125e-11	-6.1875e-11	-6.03125e-11		-4.53125e-11	-4.1875e-11	-3.5e-11	-4.53125e-11	-4.28125e-11	-4.5e-11	-4.1875e-11	-3.8125e-11	-3.71875e-11	-3.96875e-11	-3.75e-11	-3.84375e-11	-3.78125e-11
-7.90625e-11	-6.71875e-11	-6.875e-11	-5.71875e-11	-6.03125e-11	-6.28125e-11	-5.71875e-11	-5.9375e-11	-5.75e-11	-5.65625e-11	-6e-11	-6.875e-11	-5.75e-11		-4.25e-11	-4.03125e-11	-4.25e-11	-4.34375e-11	-4.5e-11	-4.53125e-11	-4.375e-11	-4.15625e-11	-3.90625e-11	-3.8125e-11	-3.84375e-11	-3.25e-11	-4.1875e-11
-8.0625e-11	-5.59375e-11	-7.3125e-11	-6.09375e-11	-6.28125e-11	-6.1875e-11	-5.03125e-11	-6.1875e-11	-6.15625e-11	-5.21875e-11	-5.40625e-11	-7.125e-11	-5.9375e-11		-4.6875e-11	-4.15625e-11	-4.03125e-11	-4.3125e-11	-4.3125e-11	-4.53125e-11	-3.84375e-11	-4.5e-11	-4.125e-11	-3.65625e-11	-3.6875e-11	-3.15625e-11	-4.21875e-11
-7.75e-11	-6.46875e-11	-7.71875e-11	-6.5e-11	-5.21875e-11	-6.0625e-11	-5.25e-11	-5.15625e-11	-5.40625e-11	-5.15625e-11	-5.71875e-11	-5.71875e-11	-5.15625e-11		-4.46875e-11	-4.53125e-11	-4.5e-11	-3.8125e-11	-4.21875e-11	-3.96875e-11	-4.1875e-11	-4.21875e-11	-4.3125e-11	-3.5e-11	-3.65625e-11	-3.5625e-11	-3.65625e-11
-6.96875e-11	-6.90625e-11	-7.03125e-11	-5.5625e-11	-5.8125e-11	-6.03125e-11	-5.15625e-11	-5.9375e-11	-5.9375e-11	-4.59375e-11	-5.625e-11	-6.59375e-11	-5.9375e-11		-4.28125e-11	-4.59375e-11	-4.5625e-11	-4.03125e-11	-4.5e-11	-3.65625e-11	-4.34375e-11	-4.15625e-11	-4.03125e-11	-3.71875e-11	-4.09375e-11	-3.6875e-11	-3.6875e-11
-7.28125e-11	-6.9375e-11	-6.90625e-11	-6.15625e-11	-5.90625e-11	-5.96875e-11	-5.1875e-11	-5.5e-11	-5.78125e-11	-5.34375e-11	-6.28125e-11	-6.40625e-11	-5.4375e-11		-4.34375e-11	-4.5625e-11	-4.09375e-11	-4.03125e-11	-3.59375e-11	-3.5e-11	-4.28125e-11	-4.1875e-11	-3.53125e-11	-3.78125e-11	-3.90625e-11	-3.75e-11	-3.84375e-11
-7.84375e-11	-6.8125e-11	-7.03125e-11	-6.71875e-11	-6.15625e-11	-6.15625e-11	-5.28125e-11	-5.25e-11	-5.15625e-11	-5e-11	-6.03125e-11	-6.1875e-11	-5.03125e-11		-4.5e-11	-4.03125e-11	-4.03125e-11	-4.1875e-11	-3.875e-11	-3.625e-11	-3.84375e-11	-4.71875e-11	-3.78125e-11	-4.03125e-11	-3.5e-11	-3.5625e-11	-3.78125e-11
-7e-11	-6.5625e-11	-7.625e-11	-6.5e-11	-5.34375e-11	-6.28125e-11	-5.84375e-11	-5.375e-11	-6.28125e-11	-5.34375e-11	-6.125e-11	-6.5e-11	-6.4375e-11		-4.28125e-11	-4.09375e-11	-4.40625e-11	-4.3125e-11	-4.375e-11	-3.78125e-11	-4.03125e-11	-4.4375e-11	-3.78125e-11	-4.15625e-11	-3.9375e-11	-3.5e-11	-4.21875e-11
-7.3125e-11	-6.90625e-11	-7.34375e-11	-5.5625e-11	-5.4375e-11	-5.96875e-11	-5.25e-11	-5.6875e-11	-6.28125e-11	-5.0625e-11	-5.09375e-11	-6.4375e-11	-5.59375e-11		-4.5e-11	-4.375e-11	-4.34375e-11	-4.375e-11	-4.40625e-11	-4.09375e-11	-3.9375e-11	-4.0625e-11	-3.75e-11	-4.03125e-11	-3.8125e-11	-3.65625e-11	-3.75e-11
-7.03125e-11	-6.125e-11	-6.9375e-11	-6.28125e-11	-5.28125e-11	-6e-11	-5.4375e-11	-5.65625e-11	-6.15625e-11	-4.5e-11	-5.84375e-11	-6.3125e-11	-5.90625e-11		-4.4375e-11	-4.03125e-11	-4.5e-11	-3.8125e-11	-4.40625e-11	-4.375e-11	-4.4375e-11	-4.03125e-11	-4.09375e-11	-4.34375e-11	-4.03125e-11	-3.53125e-11	-3.65625e-11
-7.4375e-11	-6.1875e-11	-6.90625e-11	-6.46875e-11	-5.71875e-11	-6.15625e-11	-6.03125e-11	-5.78125e-11	-6.375e-11	-5.21875e-11	-6.21875e-11	-5.96875e-11	-6.03125e-11		-4.03125e-11	-4.28125e-11	-3.6875e-11	-3.90625e-11	-4.71875e-11	-4.78125e-11	-4.1875e-11	-3.65625e-11	-4.1875e-11	-4.21875e-11	-3.125e-11	-4.125e-11	-4.1875e-11
-7.1875e-11	-6.4375e-11	-7.21875e-11	-6.125e-11	-5.40625e-11	-6.625e-11	-5.34375e-11	-5.96875e-11	-5.9375e-11	-5.21875e-11	-6.25e-11	-6.34375e-11	-6.71875e-11		-3.84375e-11	-4.65625e-11	-4.71875e-11	-4.78125e-11	-4.46875e-11	-4.65625e-11	-3.65625e-11	-3.4375e-11	-3.9375e-11	-3.84375e-11	-3.25e-11	-4.4375e-11	-3.71875e-11
-7.6875e-11	-6.28125e-11	-7.0625e-11	-6.03125e-11	-5.34375e-11	-6.28125e-11	-5.5625e-11	-6.40625e-11	-5.65625e-11	-4.84375e-11	-5.5e-11	-6.40625e-11	-6.09375e-11		-4.15625e-11	-4.09375e-11	-4.46875e-11	-4.6875e-11	-4.21875e-11	-4.03125e-11	-4.53125e-11	-4.34375e-11	-4.03125e-11	-4.03125e-11	-3.375e-11	-3.84375e-11	-3.59375e-11
-7.1875e-11	-6.40625e-11	-6.46875e-11	-6.53125e-11	-5.96875e-11	-6.09375e-11	-5.46875e-11	-6.40625e-11	-5.9375e-11	-5.6875e-11	-6.0625e-11	-6.40625e-11	-5.375e-11		-4.84375e-11	-4.28125e-11	-3.84375e-11	-3.96875e-11	-4.34375e-11	-3.5625e-11	-4.96875e-11	-4.84375e-11	-4.375e-11	-4.03125e-11	-4.40625e-11	-4.03125e-11	-3.5e-11
-7.40625e-11	-6.21875e-11	-7.15625e-11	-6.28125e-11	-5.5e-11	-6.625e-11	-5.28125e-11	-5.875e-11	-5.71875e-11	-5.71875e-11	-4.96875e-11	-6.5e-11	-6.21875e-11		-4.59375e-11	-4.09375e-11	-4.21875e-11	-4.09375e-11	-4.625e-11	-4.15625e-11	-4.46875e-11	-4.46875e-11	-3.875e-11	-3.6875e-11	-4.15625e-11	-3.90625e-11	-3.90625e-11
-6.9375e-11	-6.03125e-11	-6.65625e-11	-6.1875e-11	-5.46875e-11	-6.5625e-11	-4.875e-11	-6.1875e-11	-5.46875e-11	-5.40625e-11	-5.40625e-11	-6.3125e-11	-5.375e-11		-4.6875e-11	-4.15625e-11	-5e-11	-4.34375e-11	-4.21875e-11	-4.5e-11	-3.90625e-11	-4.46875e-11	-4.28125e-11	-3.625e-11	-3.625e-11	-3.40625e-11	-4.21875e-11
-7.15625e-11	-6.46875e-11	-6.6875e-11	-6.21875e-11	-6.15625e-11	-5.53125e-11	-5.40625e-11	-5.4375e-11	-6e-11	-5.1875e-11	-5.875e-11	-6.28125e-11	-6.03125e-11		-4.40625e-11	-4.09375e-11	-4.65625e-11	-4.21875e-11	-4.03125e-11	-4.78125e-11	-4.09375e-11	-4.09375e-11	-3.59375e-11	-3.90625e-11	-3.71875e-11	-3.59375e-11	-3.71875e-11
-6.90625e-11	-7e-11	-6.21875e-11	-5.9375e-11	-5.71875e-11	-6.4375e-11	-5.1875e-11	-6.25e-11	-5.4375e-11	-5.75e-11	-6.25e-11	-5.59375e-11	-5.25e-11		-4.5625e-11	-4.65625e-11	-4.5e-11	-4.46875e-11	-4.21875e-11	-3.96875e-11	-4.34375e-11	-4.40625e-11	-3.6875e-11	-4.40625e-11	-3.875e-11	-3.46875e-11	-3.46875e-11
-7.8125e-11	-6.03125e-11	-7e-11	-6.53125e-11	-6.375e-11	-7e-11	-5.71875e-11	-5.875e-11	-5.5625e-11	-5.53125e-11	-5.84375e-11	-6.15625e-11	-5.84375e-11		-4.75e-11	-4.65625e-11	-4.21875e-11	-4.5e-11	-4.34375e-11	-3.78125e-11	-4.25e-11	-4.4375e-11	-4.21875e-11	-3.65625e-11	-3.5e-11	-3.375e-11	-3.59375e-11
-7.28125e-11	-6.59375e-11	-6.6875e-11	-5.9375e-11	-5.46875e-11	-6.21875e-11	-5.46875e-11	-6.34375e-11	-5.65625e-11	-5.28125e-11	-5.59375e-11	-6.625e-11	-6.09375e-11		-4.53125e-11	-4.9375e-11	-4e-11	-3.875e-11	-4.03125e-11	-4.34375e-11	-4.1875e-11	-4.21875e-11	-3.875e-11	-4.125e-11	-4.5e-11	-3.875e-11	-3.71875e-11
-7.46875e-11	-6.09375e-11	-6.6875e-11	-5.84375e-11	-5.78125e-11	-5.4375e-11	-5.84375e-11	-5.875e-11	-6.09375e-11	-5.40625e-11	-5.875e-11	-7.15625e-11	-6.1875e-11		-4.03125e-11	-4.28125e-11	-4.375e-11	-3.90625e-11	-4.53125e-11	-4.4375e-11	-4.15625e-11	-3.9375e-11	-4.25e-11	-4.4375e-11	-4.5e-11	-3.21875e-11	-3.90625e-11
-8.15625e-11	-7.0625e-11	-7.25e-11	-6.21875e-11	-5.65625e-11	-6.3125e-11	-5.5625e-11	-5.5e-11	-6.5e-11	-5.5e-11	-6.0625e-11	-5.65625e-11	-5.6875e-11		-4.125e-11	-4.28125e-11	-3.9375e-11	-4.03125e-11	-4.34375e-11	-3.75e-11	-3.9375e-11	-4.125e-11	-5.03125e-11	-3.84375e-11	-4e-11	-3.03125e-11	-3.8125e-11
-8.09375e-11	-6.5e-11	-6.71875e-11	-5.78125e-11	-5.59375e-11	-6.34375e-11	-5.03125e-11	-6.03125e-11	-5.90625e-11	-6.03125e-11	-6.5e-11	-6.21875e-11	-5.90625e-11		-4.28125e-11	-4.875e-11	-3.96875e-11	-3.8125e-11	-4.78125e-11	-4.21875e-11	-4.0625e-11	-3.65625e-11	-4.34375e-11	-3.65625e-11	-3.5e-11	-3.59375e-11	-3.90625e-11
-7.125e-11	-6.84375e-11	-7.03125e-11	-5.6875e-11	-5.78125e-11	-6.34375e-11	-5.40625e-11	-6.28125e-11	-5.53125e-11	-5.71875e-11	-5.90625e-11	-6.65625e-11	-5.46875e-11		-4.21875e-11	-4.8125e-11	-4.0625e-11	-4.03125e-11	-4.09375e-11	-4.09375e-11	-4.65625e-11	-4.3125e-11	-3.71875e-11	-4.0625e-11	-3.34375e-11	-3.75e-11	-3.75e-11
-7.21875e-11	-6.46875e-11	-6.90625e-11	-6.40625e-11	-5.375e-11	-6.4375e-11	-6.03125e-11	-6.0625e-11	-6.15625e-11	-6.03125e-11	-5.6875e-11	-6.46875e-11	-5.875e-11		-4.5625e-11	-4.65625e-11	-4.5e-11	-3.75e-11	-4.21875e-11	-3.875e-11	-4.03125e-11	-4.375e-11	-3.9375e-11	-4.09375e-11	-3.625e-11	-4.21875e-11	-3.90625e-11
-7.375e-11	-6.375e-11	-6.90625e-11	-6.15625e-11	-5.9375e-11	-6.28125e-11	-5.03125e-11	-6.90625e-11	-5.8125e-11	-5.375e-11	-5.96875e-11	-6.625e-11	-5.6875e-11		-4.09375e-11	-4.40625e-11	-4.78125e-11	-4.09375e-11	-3.6875e-11	-3.90625e-11	-3.71875e-11	-4.28125e-11	-3.40625e-11	-3.5e-11	-4.03125e-11	-4.03125e-11	-4.40625e-11
-7.28125e-11	-6.09375e-11	-6.8125e-11	-5.90625e-11	-5.4375e-11	-6.15625e-11	-5.5625e-11	-6.03125e-11	-5.65625e-11	-5.1875e-11	-6.4375e-11	-6.15625e-11	-5.65625e-11		-4.03125e-11	-4.15625e-11	-4.21875e-11	-3.6875e-11	-3.78125e-11	-4.15625e-11	-3.875e-11	-4.28125e-11	-3.15625e-11	-3.375e-11	-4.03125e-11	-3.90625e-11	-4.03125e-11
-7.40625e-11	-6.5e-11	-7.5e-11	-6.46875e-11	-6.1875e-11	-6.34375e-11	-5.15625e-11	-6.84375e-11	-6.59375e-11	-6.0625e-11	-5.75e-11	-6.25e-11	-6e-11		-4.3125e-11	-3.71875e-11	-3.96875e-11	-4.40625e-11	-4.1875e-11	-4.3125e-11	-3.65625e-11	-4.09375e-11	-3.625e-11	-3.75e-11	-3.71875e-11	-4.25e-11	-3.625e-11
-7.71875e-11	-6.46875e-11	-7.21875e-11	-5.78125e-11	-6.375e-11	-6.9375e-11	-5.59375e-11	-6.4375e-11	-6.46875e-11	-5.65625e-11	-5.96875e-11	-6.28125e-11	-6.1875e-11		-4.1875e-11	-4.59375e-11	-4.125e-11	-4.375e-11	-4.53125e-11	-4.15625e-11	-3.90625e-11	-4.34375e-11	-3.78125e-11	-4.03125e-11	-3.78125e-11	-3.6875e-11	-4.125e-11
-7.4375e-11	-6.8125e-11	-6.75e-11	-6.78125e-11	-6.15625e-11	-6.75e-11	-5.28125e-11	-6.3125e-11	-6.15625e-11	-5.46875e-11	-6.375e-11	-6.34375e-11	-6.28125e-11		-4.28125e-11	-3.96875e-11	-4.1875e-11	-4.15625e-11	-4.375e-11	-4.09375e-11	-4.125e-11	-4.40625e-11	-4.3125e-11	-3.71875e-11	-4.15625e-11	-3.5e-11	-3.6875e-11
-8.03125e-11	-6.5e-11	-7.28125e-11	-6.25e-11	-5.84375e-11	-7.15625e-11	-5.1875e-11	-6.65625e-11	-5.5625e-11	-5.8125e-11	-5.75e-11	-6.34375e-11	-5.78125e-11		-4.28125e-11	-3.875e-11	-4.65625e-11	-4.15625e-11	-4.6875e-11	-4.1875e-11	-4.15625e-11	-4.46875e-11	-4.4375e-11	-4.375e-11	-3.6875e-11	-3.125e-11	-3.875e-11
-7.875e-11	-6.34375e-11	-7.03125e-11	-6.78125e-11	-6.03125e-11	-5.34375e-11	-5.5e-11	-5.9375e-11	-6.46875e-11	-5.65625e-11	-6.03125e-11	-6.75e-11	-5.09375e-11		-4.375e-11	-3.78125e-11	-4.375e-11	-3.90625e-11	-4.46875e-11	-3.8125e-11	-4.3125e-11	-4e-11	-4.1875e-11	-4.53125e-11	-4.375e-11	-3.59375e-11	-3.9375e-11
-7.6875e-11	-5.78125e-11	-6.8125e-11	-6.125e-11	-5.96875e-11	-5.75e-11	-5.5e-11	-6.21875e-11	-6e-11	-6.28125e-11	-6.0625e-11	-6.21875e-11	-6.21875e-11		-4.40625e-11	-4.28125e-11	-4.1875e-11	-3.71875e-11	-4.15625e-11	-4.0625e-11	-4.625e-11	-4.40625e-11	-3.8125e-11	-3.84375e-11	-4.84375e-11	-4.15625e-11	-3.625e-11
-8.03125e-11	-6.5e-11	-6.875e-11	-6.34375e-11	-5.875e-11	-6.21875e-11	-5.21875e-11	-6.125e-11	-5.5e-11	-5.625e-11	-6.03125e-11	-6.15625e-11	-5.65625e-11		-4.40625e-11	-4.375e-11	-4.75e-11	-4.28125e-11	-4.09375e-11	-4.21875e-11	-4.40625e-11	-4.1875e-11	-4.21875e-11	-3.65625e-11	-4.5e-11	-3.5e-11	-3.53125e-11
-8.25e-11	-7e-11	-6.75e-11	-6.03125e-11	-5.53125e-11	-5.78125e-11	-5.5e-11	-5.96875e-11	-6.34375e-11	-6.09375e-11	-5.5625e-11	-5.65625e-11	-5.875e-11		-4.34375e-11	-4.28125e-11	-4.375e-11	-4.4375e-11	-4.375e-11	-4.40625e-11	-4.0625e-11	-4e-11	-4.125e-11	-3.75e-11	-4.15625e-11	-3.5e-11	-4.09375e-11
-7.5625e-11	-6.15625e-11	-6.65625e-11	-5.8125e-11	-6.59375e-11	-5.625e-11	-5.875e-11	-6.1875e-11	-6.5e-11	-6.03125e-11	-6.25e-11	-6.125e-11	-5.84375e-11		-4.28125e-11	-4.03125e-11	-4.5e-11	-4.03125e-11	-4e-11	-4.15625e-11	-3.78125e-11	-4.09375e-11	-4.09375e-11	-3.65625e-11	-3.65625e-11	-3.65625e-11	-4.15625e-11
-7.1875e-11	-6.28125e-11	-7e-11	-5.5e-11	-5.5e-11	-6.1875e-11	-5.15625e-11	-6.46875e-11	-5.96875e-11	-5.78125e-11	-5.78125e-11	-5.96875e-11	-5.1875e-11		-4.4375e-11	-4.25e-11	-4.25e-11	-4.09375e-11	-4.5e-11	-4.03125e-11	-3.8125e-11	-4.0625e-11	-4.0625e-11	-4.03125e-11	-3.25e-11	-4.09375e-11	-4.125e-11
-7.5e-11	-7.8125e-11	-7.28125e-11	-5.8125e-11	-5.875e-11	-6.15625e-11	-5.8125e-11	-5.9375e-11	-6.25e-11	-5.53125e-11	-5.4375e-11	-6.6875e-11	-5.75e-11		-4.78125e-11	-4.34375e-11	-4.21875e-11	-3.46875e-11	-4.46875e-11	-4.03125e-11	-4.03125e-11	-4.1875e-11	-3.9375e-11	-4.03125e-11	-4.28125e-11	-3.53125e-11	-3.40625e-11
-7.6875e-11	-6.5625e-11	-7.0625e-11	-6.03125e-11	-6.3125e-11	-5.84375e-11	-6.40625e-11	-6.5e-11	-6.5625e-11	-6.46875e-11	-5.625e-11	-5.75e-11	-5.65625e-11		-4.65625e-11	-4.0625e-11	-4.5e-11	-4.03125e-11	-4.9375e-11	-4.03125e-11	-4.0625e-11	-4.3125e-11	-3.5e-11	-3.8125e-11	-4.03125e-11	-3.78125e-11	-3.53125e-11
-8.03125e-11	-6.5e-11	-6.46875e-11	-6.5e-11	-5.625e-11	-6.03125e-11	-5.5e-11	-6.5625e-11	-6.09375e-11	-5.4375e-11	-5.78125e-11	-6.90625e-11	-6.15625e-11		-4.1875e-11	-4.28125e-11	-4.15625e-11	-4.375e-11	-4.4375e-11	-4.21875e-11	-3.84375e-11	-4.34375e-11	-4.03125e-11	-3.65625e-11	-3.65625e-11	-4.125e-11	-3.8125e-11
-6.78125e-11	-6.59375e-11	-7.40625e-11	-5.5625e-11	-6.15625e-11	-5.875e-11	-4.96875e-11	-6.59375e-11	-6.0625e-11	-5.5e-11	-5.53125e-11	-6.8125e-11	-5.4375e-11		-4.65625e-11	-4.46875e-11	-4.03125e-11	-4.125e-11	-4.4375e-11	-3.78125e-11	-3.84375e-11	-4.25e-11	-3.78125e-11	-3.9375e-11	-3.875e-11	-4.03125e-11	-4.09375e-11
-7.28125e-11	-6.28125e-11	-6.90625e-11	-6.03125e-11	-6.21875e-11	-5.9375e-11	-5.28125e-11	-6.59375e-11	-6.15625e-11	-5.59375e-11	-5.6875e-11	-6.21875e-11	-5.5e-11		-4.5625e-11	-4.28125e-11	-4e-11	-4.5e-11	-4.625e-11	-3.84375e-11	-4.125e-11	-4.40625e-11	-3.84375e-11	-3.625e-11	-3.96875e-11	-3.90625e-11	-4.03125e-11
-7.3125e-11	-6.84375e-11	-6.9375e-11	-6.375e-11	-6e-11	-7.34375e-11	-6.3125e-11	-6.0625e-11	-6.34375e-11	-6.03125e-11	-6.03125e-11	-7e-11	-6.03125e-11		-4.28125e-11	-4.40625e-11	-4.46875e-11	-4.59375e-11	-4.15625e-11	-4.15625e-11	-4.21875e-11	-3.71875e-11	-3.59375e-11	-3.65625e-11	-3.9375e-11	-3.28125e-11	-3.84375e-11
-7.15625e-11	-6.5e-11	-6.90625e-11	-6.53125e-11	-6.0625e-11	-6.03125e-11	-5.5e-11	-6.21875e-11	-6.53125e-11	-6.3125e-11	-5.6875e-11	-6.03125e-11	-6.1875e-11		-4.4375e-11	-4.21875e-11	-4.34375e-11	-4.4375e-11	-4.03125e-11	-4.0625e-11	-4.09375e-11	-4.03125e-11	-3.90625e-11	-3.84375e-11	-4.28125e-11	-3.5625e-11	-3.71875e-11
-7.78125e-11	-6.4375e-11	-7e-11	-6.34375e-11	-5.84375e-11	-5.84375e-11	-5.90625e-11	-6.21875e-11	-6.03125e-11	-5.8125e-11	-5.9375e-11	-6.1875e-11	-5.59375e-11		-4.78125e-11	-3.59375e-11	-4.53125e-11	-3.78125e-11	-4.03125e-11	-4.125e-11	-3.875e-11	-4.03125e-11	-4.0625e-11	-4.03125e-11	-4.0625e-11	-3.40625e-11	-3.53125e-11
-7.09375e-11	-7.21875e-11	-7e-11	-5.65625e-11	-5.71875e-11	-5.84375e-11	-6e-11	-6.09375e-11	-5.90625e-11	-5.53125e-11	-5.15625e-11	-6.125e-11	-5.875e-11		-4.375e-11	-4.0625e-11	-4.15625e-11	-3.71875e-11	-4.21875e-11	-3.59375e-11	-4.40625e-11	-4.03125e-11	-4.125e-11	-3.5625e-11	-3.84375e-11	-3.5625e-11	-3.96875e-11
-6.96875e-11	-6.84375e-11	-5.96875e-11	-6.15625e-11	-6.3125e-11	-6.5e-11	-5.5e-11	-6.59375e-11	-6.40625e-11	-6.03125e-11	-6.46875e-11	-6.15625e-11	-6.4375e-11		-4.09375e-11	-4.15625e-11	-3.96875e-11	-4.40625e-11	-3.9375e-11	-3.6875e-11	-4.34375e-11	-4.5625e-11	-4.28125e-11	-3.78125e-11	-3.71875e-11	-3.53125e-11	-3.78125e-11
-7.15625e-11	-6.65625e-11	-6.375e-11	-6.28125e-11	-6.125e-11	-5.59375e-11	-5.8125e-11	-5.40625e-11	-6e-11	-6.1875e-11	-5.78125e-11	-6.28125e-11	-5.3125e-11		-4.46875e-11	-4.3125e-11	-4.0625e-11	-4.34375e-11	-3.84375e-11	-3.59375e-11	-4.15625e-11	-4.1875e-11	-3.71875e-11	-3.6875e-11	-3.59375e-11	-3.53125e-11	-3.875e-11
-7.28125e-11	-6.78125e-11	-7.15625e-11	-6.53125e-11	-5.9375e-11	-6.375e-11	-5.6875e-11	-6.375e-11	-5.8125e-11	-5.5e-11	-6.53125e-11	-5.71875e-11	-5.65625e-11		-4.65625e-11	-4.09375e-11	-3.875e-11	-4.4375e-11	-4.1875e-11	-3.96875e-11	-4.40625e-11	-3.90625e-11	-3.65625e-11	-3.96875e-11	-3.84375e-11	-3.59375e-11	-3.6875e-11
-6.78125e-11	-7.1875e-11	-6.5625e-11	-6.875e-11	-5.96875e-11	-5.8125e-11	-5.75e-11	-6.21875e-11	-6.21875e-11	-5.875e-11	-6.09375e-11	-6.75e-11	-6.375e-11		-4.4375e-11	-4.28125e-11	-3.71875e-11	-4.4375e-11	-4.5e-11	-4.03125e-11	-4.40625e-11	-3.40625e-11	-4.03125e-11	-4.0625e-11	-3.84375e-11	-3.40625e-11	-4.15625e-11
-7.65625e-11	-7.0625e-11	-6.78125e-11	-6e-11	-6.03125e-11	-6.40625e-11	-5.5625e-11	-5.21875e-11	-5.75e-11	-5.40625e-11	-5.8125e-11	-6.96875e-11	-5.96875e-11		-4.9375e-11	-4.3125e-11	-4.03125e-11	-4.03125e-11	-4.3125e-11	-3.75e-11	-3.875e-11	-3.65625e-11	-4.0625e-11	-4.0625e-11	-3.84375e-11	-3.28125e-11	-4.21875e-11
-7.375e-11	-7.09375e-11	-6.5e-11	-5.65625e-11	-6.03125e-11	-6.34375e-11	-6.03125e-11	-5.1875e-11	-5.5625e-11	-6.1875e-11	-5.375e-11	-6.625e-11	-5.375e-11		-4.5625e-11	-4.34375e-11	-4.59375e-11	-3.71875e-11	-4.34375e-11	-3.875e-11	-3.875e-11	-4.1875e-11	-3.9375e-11	-3.9375e-11	-3.25e-11	-4.21875e-11	-4.15625e-11
-7.15625e-11	-7.0625e-11	-6.34375e-11	-6.03125e-11	-5.78125e-11	-6.5e-11	-6.21875e-11	-6.0625e-11	-6.21875e-11	-6.03125e-11	-5.59375e-11	-6.5e-11	-5.28125e-11		-4.53125e-11	-4.375e-11	-4.34375e-11	-3.6875e-11	-4.40625e-11	-4.46875e-11	-3.84375e-11	-3.5625e-11	-3.59375e-11	-3.90625e-11	-3.34375e-11	-3.53125e-11	-3.6875e-11
-7.65625e-11	-6.1875e-11	-6.375e-11	-6.53125e-11	-5.71875e-11	-5.71875e-11	-5.28125e-11	-6.1875e-11	-5.78125e-11	-5.34375e-11	-6e-11	-6.5625e-11	-5.9375e-11		-4.59375e-11	-4.15625e-11	-4.4375e-11	-4.03125e-11	-4.125e-11	-4.09375e-11	-3.78125e-11	-3.625e-11	-4.03125e-11	-3.4375e-11	-3.8125e-11	-3.5e-11	-3.78125e-11
-7e-11	-6.625e-11	-6.78125e-11	-5.78125e-11	-5.625e-11	-6.5e-11	-5.6875e-11	-6.65625e-11	-6.03125e-11	-6.1875e-11	-6.28125e-11	-6.40625e-11	-5.53125e-11		-4.46875e-11	-4.375e-11	-4.4375e-11	-4.59375e-11	-4.65625e-11	-4.5e-11	-4.125e-11	-4.59375e-11	-4.34375e-11	-3.4375e-11	-4.125e-11	-3.6875e-11	-3.90625e-11
-7.65625e-11	-7.25e-11	-6.46875e-11	-5.84375e-11	-5.78125e-11	-6.53125e-11	-5.34375e-11	-5.75e-11	-6.46875e-11	-5.84375e-11	-5.8125e-11	-6.625e-11	-6e-11		-4.40625e-11	-4.09375e-11	-4.09375e-11	-4.25e-11	-4.03125e-11	-4.375e-11	-4.28125e-11	-4.46875e-11	-4.15625e-11	-3.375e-11	-3.8125e-11	-3.34375e-11	-3.9375e-11
-7.21875e-11	-7.03125e-11	-6.1875e-11	-5.65625e-11	-6e-11	-5.6875e-11	-5.34375e-11	-5.78125e-11	-5.96875e-11	-6.15625e-11	-6.03125e-11	-6.3125e-11	-5.71875e-11		-4.6875e-11	-4.03125e-11	-4.28125e-11	-4.09375e-11	-4.03125e-11	-4.125e-11	-4.21875e-11	-4.125e-11	-4.0625e-11	-3.90625e-11	-4.03125e-11	-3.71875e-11	-3.84375e-11
-7.4375e-11	-6.9375e-11	-6.4375e-11	-5.9375e-11	-5.5e-11	-5.8125e-11	-5.5e-11	-5.71875e-11	-6.4375e-11	-6.21875e-11	-5.9375e-11	-6.1875e-11	-5.15625e-11		-4.71875e-11	-4.40625e-11	-4.15625e-11	-3.46875e-11	-3.84375e-11	-4.1875e-11	-4.25e-11	-4.28125e-11	-3.9375e-11	-4.09375e-11	-3.71875e-11	-4.03125e-11	-3.8125e-11
-7.3125e-11	-6.3125e-11	-6.34375e-11	-5.9375e-11	-5.78125e-11	-6.34375e-11	-6.6875e-11	-6.1875e-11	-6.15625e-11	-6.03125e-11	-6.3125e-11	-6.59375e-11	-5.46875e-11		-4.53125e-11	-4.71875e-11	-3.78125e-11	-4.375e-11	-4.21875e-11	-4.34375e-11	-4.4375e-11	-4.46875e-11	-3.65625e-11	-3.84375e-11	-3.59375e-11	-3.6875e-11	-4.28125e-11
-7.1875e-11	-7.25e-11	-6.25e-11	-5.96875e-11	-6.25e-11	-6.1875e-11	-5.5625e-11	-5.65625e-11	-5.8125e-11	-5.71875e-11	-6.03125e-11	-6.6875e-11	-5.53125e-11		-3.9375e-11	-4.4375e-11	-4.0625e-11	-4.40625e-11	-4.3125e-11	-4.28125e-11	-3.8125e-11	-4.375e-11	-4.0625e-11	-3.71875e-11	-3.6875e-11	-3.78125e-11	-4.03125e-11
-7.1875e-11	-7.09375e-11	-6.625e-11	-6.375e-11	-5.6875e-11	-5.65625e-11	-6.28125e-11	-6.0625e-11	-5.9375e-11	-5.65625e-11	-6.03125e-11	-6.3125e-11	-5.71875e-11		-4.40625e-11	-3.84375e-11	-3.71875e-11	-4.09375e-11	-3.875e-11	-4.375e-11	-3.78125e-11	-3.9375e-11	-4.34375e-11	-3.65625e-11	-4.5e-11	-3.875e-11	-3.34375e-11
-7.65625e-11	-7.15625e-11	-6.8125e-11	-5.84375e-11	-5.75e-11	-6.1875e-11	-5.96875e-11	-5.78125e-11	-6.1875e-11	-6.59375e-11	-5.84375e-11	-6.96875e-11	-5.875e-11		-4.59375e-11	-4.78125e-11	-4.15625e-11	-4.21875e-11	-4.03125e-11	-4.03125e-11	-4.1875e-11	-4.53125e-11	-4.46875e-11	-3.59375e-11	-4.40625e-11	-4.21875e-11	-3.71875e-11
-8.34375e-11	-6.65625e-11	-6.5625e-11	-6e-11	-6.3125e-11	-5.78125e-11	-5.6875e-11	-5.6875e-11	-6.28125e-11	-6.46875e-11	-6.21875e-11	-6.40625e-11	-5.1875e-11		-3.9375e-11	-4.21875e-11	-4.03125e-11	-4.625e-11	-4.5e-11	-3.8125e-11	-4.5e-11	-4.4375e-11	-3.90625e-11	-4.0625e-11	-4.09375e-11	-3.53125e-11	-4.40625e-11
-7.4375e-11	-6.1875e-11	-6.625e-11	-5.65625e-11	-5.875e-11	-6.21875e-11	-6.1875e-11	-5.53125e-11	-6.5e-11	-6e-11	-6.03125e-11	-6.5625e-11	-5.6875e-11		-4.15625e-11	-4.375e-11	-4.28125e-11	-4.5e-11	-4.5e-11	-3.78125e-11	-4.34375e-11	-4.09375e-11	-3.625e-11	-4.15625e-11	-3.9375e-11	-3.625e-11	-4.5e-11
-7.0625e-11	-6.96875e-11	-6.65625e-11	-5.53125e-11	-6.3125e-11	-5.59375e-11	-5.34375e-11	-5.40625e-11	-6.84375e-11	-5.84375e-11	-5.96875e-11	-6.125e-11	-5.15625e-11		-4.4375e-11	-4.3125e-11	-3.96875e-11	-4.375e-11	-3.59375e-11	-3.8125e-11	-4.4375e-11	-4.34375e-11	-4.03125e-11	-4.1875e-11	-3.78125e-11	-3.8125e-11	-4.34375e-11
-8.28125e-11	-6.4375e-11	-6.53125e-11	-6.15625e-11	-5.625e-11	-5.625e-11	-5.9375e-11	-5.90625e-11	-5.84375e-11	-6.0625e-11	-6.1875e-11	-6.6875e-11	-5.4375e-11		-4.59375e-11	-4.3125e-11	-3.96875e-11	-3.78125e-11	-4.15625e-11	-3.96875e-11	-4.28125e-11	-4.34375e-11	-4.25e-11	-3.96875e-11	-3.96875e-11	-3.84375e-11	-4.15625e-11
-7.75e-11	-7.03125e-11	-6.59375e-11	-5.625e-11	-5.40625e-11	-5.46875e-11	-6.1875e-11	-5.78125e-11	-6.21875e-11	-6.28125e-11	-6.1875e-11	-7e-11	-5.625e-11		-3.9375e-11	-4.375e-11	-4.46875e-11	-4.125e-11	-4.1875e-11	-4.5e-11	-4.25e-11	-4.375e-11	-3.65625e-11	-3.71875e-11	-4.28125e-11	-3.90625e-11	-3.875e-11
-7.40625e-11	-6.84375e-11	-7.625e-11	-6.0625e-11	-6.1875e-11	-5.65625e-11	-6e-11	-6.03125e-11	-6.15625e-11	-5.34375e-11	-5.59375e-11	-6.53125e-11	-5.59375e-11		-3.75e-11	-4.03125e-11	-4.90625e-11	-4.5e-11	-4.03125e-11	-3.84375e-11	-4.09375e-11	-4.65625e-11	-3.65625e-11	-3.8125e-11	-4e-11	-3.5e-11	-3.5e-11
-8.03125e-11	-7.40625e-11	-7.3125e-11	-6.1875e-11	-5.78125e-11	-6.5e-11	-5.46875e-11	-6.40625e-11	-5.9375e-11	-5.6875e-11	-6.34375e-11	-6.21875e-11	-5.4375e-11		-4.375e-11	-3.53125e-11	-4.46875e-11	-4.28125e-11	-3.84375e-11	-3.71875e-11	-3.8125e-11	-3.8125e-11	-3.6875e-11	-3.75e-11	-3.84375e-11	-4.125e-11	-3.53125e-11
-8.28125e-11	-7.375e-11	-6.625e-11	-6.03125e-11	-5.6875e-11	-5.78125e-11	-5.8125e-11	-6.15625e-11	-6.1875e-11	-6e-11	-6.53125e-11	-7.21875e-11	-6e-11		-4.34375e-11	-3.96875e-11	-3.9375e-11	-4.03125e-11	-3.625e-11	-3.78125e-11	-3.65625e-11	-3.84375e-11	-3.90625e-11	-4.09375e-11	-3.46875e-11	-4.125e-11	-3.65625e-11
-7.0625e-11	-6.875e-11	-7.4375e-11	-5.875e-11	-5.40625e-11	-6.21875e-11	-5.375e-11	-6.6875e-11	-6.15625e-11	-5.96875e-11	-6e-11	-6.6875e-11	-5.59375e-11		-4.34375e-11	-4.4375e-11	-4.15625e-11	-4.15625e-11	-4.40625e-11	-3.4375e-11	-4.1875e-11	-4.28125e-11	-4.40625e-11	-4.03125e-11	-3.96875e-11	-3.6875e-11	-3.75e-11
-7.71875e-11	-7.375e-11	-7e-11	-5.65625e-11	-5.375e-11	-5.8125e-11	-5.78125e-11	-5.9375e-11	-5.84375e-11	-5.875e-11	-6e-11	-6.03125e-11	-5.65625e-11		-4.5e-11	-4.375e-11	-4.28125e-11	-4.375e-11	-4.9375e-11	-4.21875e-11	-4.5e-11	-4.34375e-11	-4.8125e-11	-4.09375e-11	-4.09375e-11	-3.65625e-11	-4.09375e-11
-7.15625e-11	-7.5e-11	-7.09375e-11	-5.96875e-11	-6.09375e-11	-6.375e-11	-5.625e-11	-6.3125e-11	-6.84375e-11	-6.3125e-11	-5.5e-11	-6.34375e-11	-6.21875e-11		-4.40625e-11	-3.84375e-11	-3.5e-11	-4.03125e-11	-4.34375e-11	-4.21875e-11	-4.28125e-11	-4.65625e-11	-4.625e-11	-3.84375e-11	-3.8125e-11	-3.78125e-11	-4.28125e-11
-7.65625e-11	-6.9375e-11	-7e-11	-6.28125e-11	-5.59375e-11	-5.8125e-11	-6.34375e-11	-6.09375e-11	-6.09375e-11	-5.875e-11	-5.96875e-11	-6.03125e-11	-5.53125e-11		-3.96875e-11	-3.6875e-11	-3.625e-11	-3.84375e-11	-4.1875e-11	-3.1875e-11	-4.0625e-11	-4.09375e-11	-3.65625e-11	-3.65625e-11	-4.21875e-11	-4.46875e-11	-4e-11
-7.1875e-11	-7e-11	-7.15625e-11	-6.46875e-11	-5.65625e-11	-5.34375e-11	-6.0625e-11	-5.875e-11	-6.34375e-11	-6.3125e-11	-5.96875e-11	-7.09375e-11	-5.625e-11		-4.28125e-11	-4.4375e-11	-4.09375e-11	-4.1875e-11	-4.21875e-11	-3.875e-11	-4.03125e-11	-3.65625e-11	-3.78125e-11	-3.8125e-11	-4.625e-11	-3.84375e-11	-3.5e-11
-7.65625e-11	-6.46875e-11	-7.0625e-11	-6.65625e-11	-5.65625e-11	-5.90625e-11	-6.09375e-11	-5.875e-11	-5.96875e-11	-5.84375e-11	-6.15625e-11	-7.0625e-11	-4.8125e-11		-4.21875e-11	-4.5e-11	-4.21875e-11	-4.15625e-11	-4.375e-11	-4.0625e-11	-4.09375e-11	-3.84375e-11	-4.375e-11	-3.90625e-11	-4.0625e-11	-3.59375e-11	-3.875e-11
-8.15625e-11	-6.40625e-11	-6.90625e-11	-6.1875e-11	-5.84375e-11	-6.34375e-11	-6.03125e-11	-5.1875e-11	-6.03125e-11	-5.40625e-11	-6e-11	-6.46875e-11	-5.125e-11		-4.375e-11	-4.03125e-11	-4.40625e-11	-4.0625e-11	-4.40625e-11	-3.8125e-11	-3.875e-11	-4.15625e-11	-4.0625e-11	-3.8125e-11	-3.65625e-11	-3.6875e-11	-4.1875e-11
-7.875e-11	-6.5e-11	-7.15625e-11	-6.15625e-11	-5.8125e-11	-6.21875e-11	-5.96875e-11	-5.84375e-11	-6.65625e-11	-5.53125e-11	-5.96875e-11	-6.5e-11	-6.375e-11		-5.125e-11	-4.40625e-11	-4.78125e-11	-4.4375e-11	-4.09375e-11	-4.4375e-11	-4.1875e-11	-4.09375e-11	-3.78125e-11	-4.1875e-11	-3.40625e-11	-3.34375e-11	-3.75e-11
-7.53125e-11	-7e-11	-6.46875e-11	-5.96875e-11	-5.5e-11	-6.03125e-11	-5.09375e-11	-5.96875e-11	-6.125e-11	-5.6875e-11	-6.125e-11	-6.46875e-11	-5.59375e-11		-4.9375e-11	-4.25e-11	-4.75e-11	-4.5e-11	-4.03125e-11	-4.09375e-11	-4.3125e-11	-4.375e-11	-3.46875e-11	-3.90625e-11	-3.71875e-11	-3.53125e-11	-3.96875e-11
-7.46875e-11	-6.9375e-11	-7.53125e-11	-5.78125e-11	-5.53125e-11	-5.75e-11	-4.96875e-11	-5.84375e-11	-6.09375e-11	-5.78125e-11	-6.375e-11	-6.40625e-11	-5.5e-11		-4.21875e-11	-4.5e-11	-4.65625e-11	-4.03125e-11	-4.28125e-11	-4.59375e-11	-4.53125e-11	-4.0625e-11	-3.59375e-11	-3.65625e-11	-3.875e-11	-3.78125e-11	-3.59375e-11
-7.15625e-11	-6.34375e-11	-6.84375e-11	-6.0625e-11	-5.5e-11	-5.9375e-11	-5.21875e-11	-5.75e-11	-6.40625e-11	-5.65625e-11	-5.84375e-11	-6.71875e-11	-5.78125e-11		-3.84375e-11	-4.6875e-11	-4.5e-11	-4.15625e-11	-4.5625e-11	-4.28125e-11	-4.0625e-11	-3.84375e-11	-3.75e-11	-3.8125e-11	-4.15625e-11	-3.65625e-11	-3.5e-11
-7.625e-11	-6.90625e-11	-6.65625e-11	-6.46875e-11	-5.78125e-11	-6.59375e-11	-5.59375e-11	-5.625e-11	-6.1875e-11	-6.03125e-11	-5.90625e-11	-6.5625e-11	-5.34375e-11		-4.1875e-11	-4.53125e-11	-4.28125e-11	-3.53125e-11	-4.03125e-11	-4.15625e-11	-4.1875e-11	-4.3125e-11	-4.15625e-11	-3.53125e-11	-3.71875e-11	-3.875e-11	-4.03125e-11
-7.53125e-11	-6.8125e-11	-6.71875e-11	-6.1875e-11	-5.09375e-11	-6.53125e-11	-6.15625e-11	-5.75e-11	-6e-11	-5.5625e-11	-5.53125e-11	-6.78125e-11	-5.84375e-11		-4.90625e-11	-4.71875e-11	-4.09375e-11	-3.5625e-11	-3.8125e-11	-4.03125e-11	-4.28125e-11	-4.5e-11	-4.125e-11	-4.03125e-11	-3.78125e-11	-3.84375e-11	-4.625e-11
-7.625e-11	-6.90625e-11	-7.0625e-11	-6.40625e-11	-5.84375e-11	-5.96875e-11	-5.46875e-11	-5.59375e-11	-6.15625e-11	-5.84375e-11	-6.0625e-11	-6.40625e-11	-5.84375e-11		-4.28125e-11	-4.1875e-11	-4.15625e-11	-4.0625e-11	-4.21875e-11	-4.15625e-11	-4.3125e-11	-3.90625e-11	-3.78125e-11	-3.53125e-11	-3.6875e-11	-3.34375e-11	-4.09375e-11
-7.5e-11	-6.4375e-11	-6.3125e-11	-5.96875e-11	-5.78125e-11	-5.875e-11	-5.53125e-11	-6.5e-11	-6.03125e-11	-6.125e-11	-5.53125e-11	-6.84375e-11	-5e-11		-4.03125e-11	-4.3125e-11	-3.65625e-11	-4.15625e-11	-4.65625e-11	-3.71875e-11	-4.21875e-11	-4.59375e-11	-3.59375e-11	-3.40625e-11	-4.125e-11	-3.65625e-11	-3.78125e-11
-7.65625e-11	-6.875e-11	-6.90625e-11	-5.9375e-11	-5.28125e-11	-6.65625e-11	-6.03125e-11	-5.8125e-11	-7.0625e-11	-5.875e-11	-6.4375e-11	-7.09375e-11	-6.03125e-11		-4.4375e-11	-4.46875e-11	-3.78125e-11	-3.90625e-11	-4.65625e-11	-3.78125e-11	-4.03125e-11	-4.28125e-11	-4.1875e-11	-3.28125e-11	-3.53125e-11	-3.78125e-11	-3.03125e-11
-8.09375e-11	-6.3125e-11	-7.40625e-11	-6.5625e-11	-5.5e-11	-6.625e-11	-6.59375e-11	-5.8125e-11	-5.96875e-11	-6.15625e-11	-6.59375e-11	-6.84375e-11	-5.84375e-11		-4.5e-11	-4.03125e-11	-4.46875e-11	-4.34375e-11	-3.78125e-11	-4.21875e-11	-4.46875e-11	-4.15625e-11	-4.375e-11	-3.5e-11	-3.78125e-11	-3.34375e-11	-3.5e-11
-8.0625e-11	-7.40625e-11	-6.84375e-11	-5.9375e-11	-5.75e-11	-6.375e-11	-5.90625e-11	-6.15625e-11	-6.96875e-11	-6.5e-11	-6.03125e-11	-6.5625e-11	-5.59375e-11		-4.28125e-11	-4.34375e-11	-4.71875e-11	-3.71875e-11	-4.34375e-11	-4.1875e-11	-5.03125e-11	-4.09375e-11	-4.40625e-11	-4.15625e-11	-3.75e-11	-3.5e-11	-3.84375e-11
-7.65625e-11	-6.96875e-11	-7.5e-11	-6.15625e-11	-5.6875e-11	-6.4375e-11	-6.3125e-11	-5.96875e-11	-6.78125e-11	-5.9375e-11	-5.53125e-11	-6.65625e-11	-5.375e-11		-4.125e-11	-4.1875e-11	-4.59375e-11	-3.53125e-11	-4.90625e-11	-3.84375e-11	-4.28125e-11	-3.8125e-11	-3.90625e-11	-4.125e-11	-4.09375e-11	-3.84375e-11	-3.375e-11
-8.21875e-11	-7.03125e-11	-7e-11	-5.59375e-11	-5.28125e-11	-6.28125e-11	-6.40625e-11	-6.1875e-11	-6.46875e-11	-6.125e-11	-5.375e-11	-6.15625e-11	-5.21875e-11		-4.4375e-11	-3.96875e-11	-4.375e-11	-4.3125e-11	-4.40625e-11	-3.5e-11	-4.03125e-11	-4.09375e-11	-4.03125e-11	-4.1875e-11	-4.5625e-11	-3.625e-11	-3.59375e-11
-7.875e-11	-6.90625e-11	-7.25e-11	-5.71875e-11	-5.5625e-11	-6.28125e-11	-5.78125e-11	-6.03125e-11	-5.875e-11	-5.4375e-11	-6.03125e-11	-5.875e-11	-5.625e-11		-4.40625e-11	-3.96875e-11	-3.78125e-11	-4.03125e-11	-3.78125e-11	-3.78125e-11	-4.1875e-11	-3.875e-11	-4.28125e-11	-3.84375e-11	-4.15625e-11	-4.03125e-11	-3.84375e-11
-8.25e-11	-6.375e-11	-6.96875e-11	-6.375e-11	-5.40625e-11	-6.5e-11	-5.9375e-11	-6.59375e-11	-6.03125e-11	-5.8125e-11	-5.71875e-11	-6.0625e-11	-5.84375e-11		-4.4375e-11	-4.28125e-11	-4.21875e-11	-4.5e-11	-3.78125e-11	-4.78125e-11	-4.625e-11	-4e-11	-4.34375e-11	-3.875e-11	-3.84375e-11	-4.09375e-11	-4.03125e-11
-7.90625e-11	-6.53125e-11	-6.71875e-11	-6.03125e-11	-5.78125e-11	-5.46875e-11	-5.6875e-11	-5.96875e-11	-5.21875e-11	-5.59375e-11	-6.03125e-11	-5.8125e-11	-5.1875e-11		-4.0625e-11	-3.9375e-11	-4.34375e-11	-3.9375e-11	-4.03125e-11	-4.03125e-11	-4.28125e-11	-4.34375e-11	-4.4375e-11	-4.0625e-11	-4.375e-11	-4.03125e-11	-3.90625e-11
-7.625e-11	-7e-11	-7.34375e-11	-6.28125e-11	-5.5e-11	-5.8125e-11	-6.0625e-11	-5.75e-11	-5.625e-11	-6e-11	-5.5625e-11	-6.71875e-11	-5.34375e-11		-3.9375e-11	-4.5e-11	-4.25e-11	-4.21875e-11	-4.40625e-11	-3.59375e-11	-3.96875e-11	-4.625e-11	-3.8125e-11	-4.21875e-11	-4.21875e-11	-3.5625e-11	-3.9375e-11
-7.53125e-11	-6.78125e-11	-6.09375e-11	-5.8125e-11	-5.0625e-11	-6.09375e-11	-6.34375e-11	-6.5e-11	-6e-11	-5.71875e-11	-6.4375e-11	-6.78125e-11	-6.46875e-11		-4.40625e-11	-4.28125e-11	-4.0625e-11	-4.21875e-11	-4.28125e-11	-3.5625e-11	-4.28125e-11	-4.09375e-11	-3.5625e-11	-3.875e-11	-4.0625e-11	-3.6875e-11	-3.71875e-11
-8.03125e-11	-7.03125e-11	-7.15625e-11	-5.8125e-11	-5.875e-11	-5.59375e-11	-6.53125e-11	-5.8125e-11	-6.5e-11	-5.8125e-11	-6.28125e-11	-5.90625e-11	-6.1875e-11		-4.53125e-11	-3.625e-11	-4.09375e-11	-4.25e-11	-4.03125e-11	-4.34375e-11	-4.28125e-11	-4.03125e-11	-3.6875e-11	-4.0625e-11	-3.8125e-11	-3.5e-11	-4.03125e-11
-7.78125e-11	-7.5e-11	-7.71875e-11	-6.4375e-11	-6e-11	-6.28125e-11	-5.40625e-11	-5.6875e-11	-5.65625e-11	-5.90625e-11	-5.875e-11	-6.46875e-11	-5.90625e-11		-4.53125e-11	-3.78125e-11	-4.4375e-11	-3.78125e-11	-4.125e-11	-4.6875e-11	-4.09375e-11	-4.65625e-11	-4.28125e-11	-3.875e-11	-3.875e-11	-3.9375e-11	-3.625e-11
-7.15625e-11	-6.5e-11	-6.75e-11	-6.21875e-11	-5.03125e-11	-5.96875e-11	-5.9375e-11	-6.46875e-11	-6.3125e-11	-5.21875e-11	-6.21875e-11	-6.15625e-11	-5.75e-11		-4.21875e-11	-4.3125e-11	-4.4375e-11	-4.375e-11	-4.3125e-11	-4.65625e-11	-4.40625e-11	-4.34375e-11	-4.25e-11	-3.75e-11	-3.65625e-11	-3.46875e-11	-3.46875e-11
-7.59375e-11	-6.6875e-11	-7.25e-11	-5.71875e-11	-5.28125e-11	-5.90625e-11	-6.5625e-11	-6.28125e-11	-6.0625e-11	-5.78125e-11	-6.28125e-11	-6.40625e-11	-6.15625e-11		-4.34375e-11	-4.4375e-11	-4.5e-11	-4.5e-11	-4.03125e-11	-4.34375e-11	-4.03125e-11	-4.625e-11	-3.59375e-11	-3.59375e-11	-4.09375e-11	-3.6875e-11	-3.59375e-11
-7.0625e-11	-6.65625e-11	-6.6875e-11	-6.03125e-11	-5.15625e-11	-5.5e-11	-5.90625e-11	-5.75e-11	-6.53125e-11	-5.1875e-11	-5.6875e-11	-6.5e-11	-5.78125e-11		-4.625e-11	-4.59375e-11	-4.3125e-11	-4.03125e-11	-3.90625e-11	-4.09375e-11	-3.9375e-11	-4.1875e-11	-3.46875e-11	-4.03125e-11	-3.84375e-11	-3.9375e-11	-3.75e-11
-7.75e-11	-6.40625e-11	-6.5e-11	-6.625e-11	-4.59375e-11	-4.96875e-11	-6.15625e-11	-5.84375e-11	-6.25e-11	-5e-11	-6.40625e-11	-6.78125e-11	-5.875e-11		-4.09375e-11	-4.40625e-11	-4.21875e-11	-4.5e-11	-4.5e-11	-3.6875e-11	-3.8125e-11	-4.03125e-11	-4.03125e-11	-3.84375e-11	-3.5e-11	-3.3125e-11	-4.03125e-11
-6.96875e-11	-6.5e-11	-6.4375e-11	-6.46875e-11	-5.625e-11	-5.8125e-11	-5.4375e-11	-6.28125e-11	-6.1875e-11	-5.84375e-11	-6.5e-11	-6.1875e-11	-5.6875e-11		-3.875e-11	-4.03125e-11	-4.1875e-11	-4.0625e-11	-4.28125e-11	-3.84375e-11	-3.6875e-11	-3.78125e-11	-4.15625e-11	-3.84375e-11	-3.71875e-11	-3.65625e-11	-4.03125e-11
-7.59375e-11	-7.09375e-11	-6.5e-11	-5.9375e-11	-5.59375e-11	-6.125e-11	-6.4375e-11	-5.78125e-11	-6.15625e-11	-5.25e-11	-5.53125e-11	-5.84375e-11	-5.375e-11		-4.03125e-11	-3.9375e-11	-4.5e-11	-4.15625e-11	-4.03125e-11	-3.90625e-11	-4.0625e-11	-4.03125e-11	-4.03125e-11	-4.125e-11	-3.84375e-11	-4.15625e-11	-4.3125e-11
-7.625e-11	-7.0625e-11	-6.5625e-11	-6.5625e-11	-5.5e-11	-6.375e-11	-5.8125e-11	-5.46875e-11	-5.84375e-11	-5.5625e-11	-5.84375e-11	-6.5625e-11	-5.71875e-11		-4.53125e-11	-4.28125e-11	-4.28125e-11	-4.09375e-11	-4.25e-11	-3.6875e-11	-3.625e-11	-3.90625e-11	-3.84375e-11	-4.03125e-11	-3.75e-11	-3.6875e-11	-4.03125e-11
-8.21875e-11	-6.84375e-11	-6.84375e-11	-5.90625e-11	-6.8125e-11	-5.65625e-11	-5.96875e-11	-5.90625e-11	-6.53125e-11	-5.53125e-11	-6.125e-11	-6.40625e-11	-4.5625e-11		-4.53125e-11	-4.6875e-11	-3.875e-11	-4.03125e-11	-4.03125e-11	-3.96875e-11	-4.0625e-11	-4.15625e-11	-4.3125e-11	-3.625e-11	-3.65625e-11	-3.8125e-11	-4.15625e-11
-7.9375e-11	-6.625e-11	-6.34375e-11	-5.9375e-11	-5e-11	-5.46875e-11	-5.25e-11	-5.8125e-11	-6.4375e-11	-6.125e-11	-6.03125e-11	-6.5e-11	-5.84375e-11		-4.34375e-11	-4.46875e-11	-3.8125e-11	-4.34375e-11	-4.34375e-11	-4.125e-11	-3.84375e-11	-4.78125e-11	-4.34375e-11	-4.0625e-11	-3.65625e-11	-3.9375e-11	-3.84375e-11
-7.21875e-11	-6.9375e-11	-6.5625e-11	-6.0625e-11	-5.96875e-11	-5.78125e-11	-5.78125e-11	-6.375e-11	-6.46875e-11	-5.40625e-11	-6.03125e-11	-6.65625e-11	-5.28125e-11		-4.5e-11	-4.5625e-11	-4.375e-11	-4.15625e-11	-3.8125e-11	-3.90625e-11	-4.0625e-11	-4.40625e-11	-4.09375e-11	-4.03125e-11	-3.5625e-11	-3.9375e-11	-3.84375e-11
-7.6875e-11	-6.46875e-11	-7.0625e-11	-6.375e-11	-5.71875e-11	-6.15625e-11	-5.96875e-11	-6.21875e-11	-6.65625e-11	-4.9375e-11	-5.90625e-11	-6.53125e-11	-6.3125e-11		-4.21875e-11	-4.34375e-11	-4.1875e-11	-3.71875e-11	-3.90625e-11	-3.5e-11	-4.34375e-11	-4.28125e-11	-4.15625e-11	-3.625e-11	-3.96875e-11	-3.875e-11	-3.65625e-11
-7.65625e-11	-6.46875e-11	-6.40625e-11	-5.78125e-11	-5.6875e-11	-5.75e-11	-6.15625e-11	-6.5e-11	-5.5625e-11	-6.1875e-11	-5.34375e-11	-5.96875e-11	-6.15625e-11		-4.3125e-11	-4.28125e-11	-4.34375e-11	-4.03125e-11	-4.0625e-11	-4.03125e-11	-4.21875e-11	-4.1875e-11	-4.5e-11	-4.03125e-11	-3.90625e-11	-3.59375e-11	-3.34375e-11
-7.84375e-11	-6.28125e-11	-6.90625e-11	-6.34375e-11	-5.71875e-11	-5.84375e-11	-5.375e-11	-5.9375e-11	-6.03125e-11	-4.96875e-11	-6.21875e-11	-6.53125e-11	-5.5e-11		-4.53125e-11	-4.25e-11	-4.28125e-11	-3.65625e-11	-3.8125e-11	-4.40625e-11	-4.21875e-11	-4.34375e-11	-4.15625e-11	-3.78125e-11	-4.1875e-11	-4.28125e-11	-3.90625e-11
-7.4375e-11	-6.84375e-11	-6.8125e-11	-6.375e-11	-5.90625e-11	-5.5e-11	-6.5e-11	-6.21875e-11	-5.375e-11	-5.375e-11	-6.03125e-11	-6.78125e-11	-6.34375e-11		-4.8125e-11	-4.375e-11	-4.03125e-11	-4.0625e-11	-3.75e-11	-3.78125e-11	-4.625e-11	-4.375e-11	-4.15625e-11	-3.53125e-11	-4.1875e-11	-4.125e-11	-4.65625e-11
-7.03125e-11	-6.71875e-11	-6.6875e-11	-6.15625e-11	-5.78125e-11	-6.28125e-11	-5.03125e-11	-5.5e-11	-6.34375e-11	-5.875e-11	-6.1875e-11	-6.625e-11	-5.78125e-11		-4.3125e-11	-4.15625e-11	-4.375e-11	-4.46875e-11	-4.3125e-11	-3.75e-11	-4.03125e-11	-3.65625e-11	-3.84375e-11	-3.8125e-11	-4.25e-11	-3.90625e-11	-4.46875e-11
-7.1875e-11	-6.6875e-11	-7.09375e-11	-5.71875e-11	-5.46875e-11	-6.3125e-11	-5e-11	-6.28125e-11	-6.1875e-11	-5.9375e-11	-6.3125e-11	-5.625e-11	-6.25e-11		-4.5e-11	-4.25e-11	-4.4375e-11	-4.84375e-11	-4.0625e-11	-3.90625e-11	-3.75e-11	-4.21875e-11	-3.9375e-11	-3.90625e-11	-3.96875e-11	-4.28125e-11	-3.96875e-11
-8.03125e-11	-6.875e-11	-6.5e-11	-6.21875e-11	-6.21875e-11	-6.40625e-11	-5.46875e-11	-5.46875e-11	-5.96875e-11	-5.71875e-11	-5.9375e-11	-6.5e-11	-6.0625e-11		-4.5e-11	-4.21875e-11	-4.3125e-11	-4.375e-11	-4.375e-11	-3.84375e-11	-3.90625e-11	-3.5e-11	-3.96875e-11	-3.90625e-11	-3.65625e-11	-3.8125e-11	-3.90625e-11
-7.3125e-11	-6.21875e-11	-6.78125e-11	-6.1875e-11	-5.21875e-11	-6.53125e-11	-5e-11	-6.03125e-11	-6.28125e-11	-5.375e-11	-5.84375e-11	-6.46875e-11	-6.25e-11		-4.09375e-11	-4.9375e-11	-4.1875e-11	-3.78125e-11	-4.59375e-11	-3.71875e-11	-4.25e-11	-3.71875e-11	-4.09375e-11	-3.71875e-11	-3.5e-11	-3.34375e-11	-3.65625e-11
-6.9375e-11	-5.90625e-11	-6.75e-11	-6.625e-11	-5.4375e-11	-5.65625e-11	-5.78125e-11	-6.1875e-11	-6.34375e-11	-5.90625e-11	-5.625e-11	-6.75e-11	-5.96875e-11		-4.34375e-11	-4.65625e-11	-4.46875e-11	-3.84375e-11	-4.53125e-11	-3.90625e-11	-4.21875e-11	-4.3125e-11	-3.8125e-11	-3.3125e-11	-3.90625e-11	-3.34375e-11	-3.4375e-11
-7.21875e-11	-6.84375e-11	-7.09375e-11	-6.03125e-11	-6.09375e-11	-6.09375e-11	-5.71875e-11	-5.78125e-11	-6.5625e-11	-5.46875e-11	-5.71875e-11	-6.4375e-11	-6.09375e-11		-4.375e-11	-4.5e-11	-4.65625e-11	-3.9375e-11	-4.09375e-11	-3.625e-11	-4.21875e-11	-3.9375e-11	-4.4375e-11	-3.71875e-11	-4.46875e-11	-3.875e-11	-3.84375e-11
-8.03125e-11	-6.1875e-11	-6.9375e-11	-6e-11	-5.5e-11	-5.875e-11	-6.125e-11	-5.53125e-11	-5.9375e-11	-5.9375e-11	-5.84375e-11	-6.125e-11	-6.1875e-11		-4.78125e-11	-4.15625e-11	-4.28125e-11	-4.5e-11	-3.90625e-11	-3.90625e-11	-4.40625e-11	-4.03125e-11	-4.125e-11	-3.78125e-11	-4.5e-11	-3.8125e-11	-4.03125e-11
-7.125e-11	-6.34375e-11	-7.03125e-11	-5.90625e-11	-5.78125e-11	-6.4375e-11	-5.78125e-11	-5.53125e-11	-6.34375e-11	-5.25e-11	-5.53125e-11	-6.59375e-11	-6.3125e-11		-4.09375e-11	-4.15625e-11	-4.28125e-11	-3.90625e-11	-3.75e-11	-4.1875e-11	-4.28125e-11	-3.78125e-11	-4.0625e-11	-4.15625e-11	-3.59375e-11	-3.59375e-11	-3.78125e-11
-7.34375e-11	-6.625e-11	-6.71875e-11	-6.1875e-11	-5.5e-11	-5.71875e-11	-5.6875e-11	-5.71875e-11	-6.1875e-11	-5.75e-11	-5.59375e-11	-6.09375e-11	-6.40625e-11		-3.1875e-11	-4.53125e-11	-4.25e-11	-3.78125e-11	-4.34375e-11	-3.5e-11	-4.0625e-11	-4.1875e-11	-3.65625e-11	-4.5625e-11	-3.5e-11	-3.90625e-11	-3.5625e-11
-8.1875e-11	-6.5625e-11	-7e-11	-5.78125e-11	-6.0625e-11	-6.0625e-11	-6.125e-11	-5.84375e-11	-6.28125e-11	-5.65625e-11	-5.8125e-11	-6.03125e-11	-6.0625e-11		-4.25e-11	-4.125e-11	-4.09375e-11	-4.53125e-11	-3.875e-11	-4.03125e-11	-3.59375e-11	-4.28125e-11	-4.0625e-11	-3.78125e-11	-4.28125e-11	-3.875e-11	-3.9375e-11
-8.15625e-11	-7.1875e-11	-7.28125e-11	-6.375e-11	-6.0625e-11	-6.15625e-11	-5.4375e-11	-6e-11	-6.28125e-11	-5.5e-11	-6e-11	-5.96875e-11	-6.15625e-11		-4.3125e-11	-4.5e-11	-4.0625e-11	-4.5e-11	-3.78125e-11	-4.28125e-11	-3.84375e-11	-4.53125e-11	-4.375e-11	-3.53125e-11	-3.6875e-11	-3.59375e-11	-3.46875e-11
-7.28125e-11	-6.8125e-11	-6.5e-11	-6.3125e-11	-5.71875e-11	-6.125e-11	-5.90625e-11	-5.375e-11	-6.78125e-11	-5.28125e-11	-5.875e-11	-6.09375e-11	-6.875e-11		-4.09375e-11	-4.53125e-11	-4.28125e-11	-4.03125e-11	-4.15625e-11	-4.15625e-11	-4.25e-11	-4.375e-11	-4.03125e-11	-3.6875e-11	-3.625e-11	-3.59375e-11	-3.9375e-11
-8.03125e-11	-6.5e-11	-6.53125e-11	-5.90625e-11	-5.53125e-11	-5.65625e-11	-6.03125e-11	-6.375e-11	-6.28125e-11	-5.75e-11	-6.21875e-11	-6.21875e-11	-5.59375e-11		-4.375e-11	-4.6875e-11	-4.3125e-11	-4.375e-11	-4.65625e-11	-4.28125e-11	-3.46875e-11	-4.0625e-11	-4.3125e-11	-3.59375e-11	-3.96875e-11	-3.6875e-11	-3.71875e-11
-7.1875e-11	-6.53125e-11	-6.8125e-11	-6.5e-11	-5.84375e-11	-6.40625e-11	-6.25e-11	-5.90625e-11	-6.3125e-11	-5.5e-11	-5.65625e-11	-6.09375e-11	-6.28125e-11		-4.78125e-11	-4.3125e-11	-4.15625e-11	-4.59375e-11	-4.53125e-11	-4.34375e-11	-3.75e-11	-3.75e-11	-3.9375e-11	-3.3125e-11	-4.15625e-11	-3.84375e-11	-3.6875e-11
-7.53125e-11	-6.125e-11	-6.59375e-11	-6.34375e-11	-4.75e-11	-6.09375e-11	-5.90625e-11	-5.59375e-11	-6.15625e-11	-5.5e-11	-5.625e-11	-5.78125e-11	-5.90625e-11		-4.53125e-11	-4.1875e-11	-3.6875e-11	-4.59375e-11	-3.96875e-11	-4.0625e-11	-4.21875e-11	-4.03125e-11	-3.5e-11	-3.5e-11	-3.5625e-11	-3.8125e-11	-4.0625e-11
-7.5e-11	-7.09375e-11	-6.65625e-11	-6.90625e-11	-6.40625e-11	-5.84375e-11	-5.34375e-11	-5.46875e-11	-6.90625e-11	-5.5625e-11	-5.9375e-11	-6.65625e-11	-5.9375e-11		-4.4375e-11	-4.28125e-11	-3.90625e-11	-3.78125e-11	-4.46875e-11	-4.15625e-11	-4.4375e-11	-4.59375e-11	-3.5e-11	-3.5e-11	-3.40625e-11	-3.78125e-11	-4.34375e-11
-7.53125e-11	-6.96875e-11	-6.9375e-11	-5.90625e-11	-5.375e-11	-6.3125e-11	-5.5e-11	-6.15625e-11	-5.375e-11	-5.90625e-11	-5.21875e-11	-6.25e-11	-5.84375e-11		-4.28125e-11	-4.21875e-11	-3.90625e-11	-3.53125e-11	-4.5e-11	-4.40625e-11	-3.75e-11	-4.78125e-11	-3.9375e-11	-3.59375e-11	-3.78125e-11	-3.8125e-11	-4.21875e-11
-8.03125e-11	-7e-11	-6.59375e-11	-6.1875e-11	-5.5e-11	-5.875e-11	-5.84375e-11	-5.6875e-11	-6.34375e-11	-5.15625e-11	-5.90625e-11	-6.59375e-11	-6e-11		-4.40625e-11	-4.1875e-11	-4.03125e-11	-4.28125e-11	-4.34375e-11	-4.125e-11	-3.84375e-11	-4.5e-11	-4.3125e-11	-3.6875e-11	-3.5625e-11	-3.4375e-11	-3.34375e-11
-8.125e-11	-6.71875e-11	-6.5e-11	-6.0625e-11	-5.875e-11	-5.3125e-11	-5.53125e-11	-6.09375e-11	-6.78125e-11	-5.75e-11	-5.96875e-11	-6.125e-11	-6.125e-11		-4.375e-11	-4.28125e-11	-4.40625e-11	-3.8125e-11	-4.5e-11	-4.09375e-11	-4.03125e-11	-4.375e-11	-3.5e-11	-4.03125e-11	-3.90625e-11	-3.90625e-11	-3.1875e-11
-8.125e-11	-6.1875e-11	-6.625e-11	-6.09375e-11	-5.40625e-11	-6.4375e-11	-5.15625e-11	-6.09375e-11	-6.46875e-11	-5.4375e-11	-5.28125e-11	-6.71875e-11	-6.6875e-11		-3.53125e-11	-4.28125e-11	-4.375e-11	-3.8125e-11	-4.15625e-11	-4.25e-11	-3.875e-11	-4.0625e-11	-3.6875e-11	-4.375e-11	-4.15625e-11	-3.5e-11	-3.9375e-11
-8.03125e-11	-6.40625e-11	-6.78125e-11	-7.1875e-11	-5.53125e-11	-5.84375e-11	-6.09375e-11	-5.5625e-11	-6.03125e-11	-5.09375e-11	-6.09375e-11	-6.53125e-11	-5.4375e-11		-4.15625e-11	-4.53125e-11	-4.40625e-11	-4.28125e-11	-3.96875e-11	-3.84375e-11	-3.90625e-11	-4.3125e-11	-3.65625e-11	-3.9375e-11	-3.78125e-11	-3.375e-11	-4.09375e-11
-7.3125e-11	-7.15625e-11	-7.09375e-11	-6.65625e-11	-5.53125e-11	-5.65625e-11	-6.5e-11	-6.53125e-11	-6.40625e-11	-5.4375e-11	-6.03125e-11	-6.78125e-11	-6.34375e-11		-4.28125e-11	-4.34375e-11	-4.28125e-11	-3.8125e-11	-4.3125e-11	-3.65625e-11	-3.875e-11	-3.9375e-11	-4.28125e-11	-3.6875e-11	-3.78125e-11	-4.1875e-11	-3.84375e-11
-7.875e-11	-6.71875e-11	-6.28125e-11	-6.65625e-11	-5.3125e-11	-6.03125e-11	-6.4375e-11	-6.28125e-11	-6.25e-11	-5.34375e-11	-6.1875e-11	-6.40625e-11	-5.46875e-11		-3.9375e-11	-4.6875e-11	-4.40625e-11	-4.03125e-11	-4.40625e-11	-3.78125e-11	-4.625e-11	-4.09375e-11	-4.78125e-11	-4.03125e-11	-3.875e-11	-4.09375e-11	-3.3125e-11
-7.90625e-11	-6.9375e-11	-7e-11	-6.28125e-11	-5.53125e-11	-6.28125e-11	-5.78125e-11	-5.5e-11	-6e-11	-5.625e-11	-6.03125e-11	-6.59375e-11	-5.0625e-11		-4.40625e-11	-4e-11	-4.28125e-11	-4.375e-11	-4.46875e-11	-4.53125e-11	-4.4375e-11	-4.125e-11	-4.25e-11	-3.6875e-11	-3.5625e-11	-3.65625e-11	-3.15625e-11
-7.78125e-11	-6.75e-11	-7.09375e-11	-5.71875e-11	-5.84375e-11	-5.8125e-11	-5.96875e-11	-5.9375e-11	-6.8125e-11	-5.71875e-11	-6.0625e-11	-6.5e-11	-6.78125e-11		-4.71875e-11	-3.78125e-11	-4.03125e-11	-3.9375e-11	-3.4375e-11	-4.78125e-11	-4.03125e-11	-4.5e-11	-4.0625e-11	-3.78125e-11	-3.59375e-11	-3.90625e-11	-3.40625e-11
-7.9375e-11	-7.0625e-11	-7.03125e-11	-6.3125e-11	-6.03125e-11	-6.1875e-11	-5.03125e-11	-5.8125e-11	-5.875e-11	-5.09375e-11	-6.3125e-11	-6.53125e-11	-5.71875e-11		-4.46875e-11	-3.84375e-11	-4.09375e-11	-4.3125e-11	-3.875e-11	-4.34375e-11	-4.0625e-11	-4.75e-11	-3.78125e-11	-3.65625e-11	-3.78125e-11	-3.53125e-11	-3.59375e-11
-7.34375e-11	-7.1875e-11	-5.96875e-11	-5.96875e-11	-5.5e-11	-6.59375e-11	-6.34375e-11	-5.5625e-11	-6.34375e-11	-5.46875e-11	-6.3125e-11	-7.03125e-11	-6.125e-11		-4.21875e-11	-4.0625e-11	-4e-11	-4.09375e-11	-4.46875e-11	-3.625e-11	-4.21875e-11	-4.53125e-11	-4.09375e-11	-3.25e-11	-3.8125e-11	-3.375e-11	-3.71875e-11
-8.40625e-11	-6.625e-11	-6.75e-11	-5.25e-11	-6.15625e-11	-6.09375e-11	-5.46875e-11	-5.65625e-11	-6.15625e-11	-5.53125e-11	-5.8125e-11	-6.40625e-11	-6.15625e-11		-4.3125e-11	-4.40625e-11	-4.0625e-11	-4.71875e-11	-4.46875e-11	-3.75e-11	-4.3125e-11	-3.6875e-11	-3.84375e-11	-3.59375e-11	-3.875e-11	-3.40625e-11	-3.9375e-11
-8.3125e-11	-7.5625e-11	-6.34375e-11	-5.5e-11	-5.03125e-11	-6.65625e-11	-5.375e-11	-6.09375e-11	-6.5625e-11	-6.03125e-11	-5.53125e-11	-7.15625e-11	-5.75e-11		-4.875e-11	-4.3125e-11	-4.03125e-11	-4.59375e-11	-4.53125e-11	-3.78125e-11	-3.90625e-11	-4.03125e-11	-3.78125e-11	-4.03125e-11	-3.5e-11	-3.6875e-11	-4.0625e-11
-8.03125e-11	-6.15625e-11	-6.71875e-11	-5.84375e-11	-5.90625e-11	-5.8125e-11	-5.9375e-11	-5.6875e-11	-6.59375e-11	-5.15625e-11	-6.09375e-11	-6.375e-11	-5.25e-11		-4.65625e-11	-4.1875e-11	-3.875e-11	-4.125e-11	-4.5625e-11	-4.21875e-11	-3.75e-11	-4.125e-11	-4.15625e-11	-3.78125e-11	-3.9375e-11	-3.65625e-11	-3.90625e-11
-7.21875e-11	-7.0625e-11	-7.53125e-11	-5.53125e-11	-4.9375e-11	-5.34375e-11	-5.6875e-11	-5.375e-11	-6.40625e-11	-5.5e-11	-6.03125e-11	-6.4375e-11	-5.5e-11		-4.28125e-11	-4.53125e-11	-4.4375e-11	-3.71875e-11	-4.28125e-11	-4.40625e-11	-3.5625e-11	-3.59375e-11	-3.90625e-11	-3.5e-11	-3.625e-11	-3.40625e-11	-3.625e-11
-7.46875e-11	-6.59375e-11	-7.46875e-11	-6.40625e-11	-6.0625e-11	-6.34375e-11	-5.375e-11	-5.90625e-11	-6.3125e-11	-5.0625e-11	-5.40625e-11	-6.46875e-11	-5.21875e-11		-4.375e-11	-4.5e-11	-3.9375e-11	-3.8125e-11	-4.375e-11	-4.125e-11	-4.125e-11	-3.9375e-11	-4.21875e-11	-3.5e-11	-3.75e-11	-3.40625e-11	-3.59375e-11
-7.09375e-11	-6.96875e-11	-5.78125e-11	-6.03125e-11	-5.1875e-11	-6.40625e-11	-6.3125e-11	-6.25e-11	-6.15625e-11	-5.875e-11	-6.125e-11	-7.125e-11	-5.90625e-11		-4.3125e-11	-4.59375e-11	-3.84375e-11	-3.9375e-11	-4.8125e-11	-3.78125e-11	-4.46875e-11	-4.3125e-11	-4.34375e-11	-3.84375e-11	-3.90625e-11	-3.78125e-11	-3.625e-11
-7.46875e-11	-6.78125e-11	-6.75e-11	-5.1875e-11	-5.4375e-11	-6.34375e-11	-5.59375e-11	-5.4375e-11	-6.40625e-11	-5.6875e-11	-5.46875e-11	-6.96875e-11	-6.34375e-11		-4.78125e-11	-4.53125e-11	-4.125e-11	-3.46875e-11	-4.4375e-11	-3.65625e-11	-4.1875e-11	-4.5e-11	-4.15625e-11	-4.03125e-11	-4.15625e-11	-3.5e-11	-4.03125e-11
-8.125e-11	-7.46875e-11	-6.40625e-11	-5.6875e-11	-5.625e-11	-5.90625e-11	-6.5625e-11	-5.84375e-11	-5.75e-11	-5.65625e-11	-5.5625e-11	-6.1875e-11	-6.53125e-11		-4.1875e-11	-4.34375e-11	-4.6875e-11	-3.625e-11	-4.03125e-11	-4.125e-11	-4.65625e-11	-4.5625e-11	-4.15625e-11	-4.15625e-11	-3.84375e-11	-3.5e-11	-3.65625e-11
-7.40625e-11	-6.96875e-11	-6.28125e-11	-5.71875e-11	-5.875e-11	-6.03125e-11	-6.1875e-11	-6.34375e-11	-6.53125e-11	-5.96875e-11	-6.5e-11	-6.40625e-11	-5.5e-11		-4.15625e-11	-4.4375e-11	-4.15625e-11	-3.59375e-11	-4.59375e-11	-4.375e-11	-4.25e-11	-4.5e-11	-4.03125e-11	-3.625e-11	-3.4375e-11	-3.09375e-11	-3.6875e-11
-7.46875e-11	-6.71875e-11	-6.6875e-11	-6.09375e-11	-5.59375e-11	-6.15625e-11	-6.0625e-11	-5.375e-11	-6.21875e-11	-6.15625e-11	-6.15625e-11	-6.71875e-11	-6.6875e-11		-4.125e-11	-3.8125e-11	-4.28125e-11	-3.75e-11	-4.4375e-11	-4.4375e-11	-3.78125e-11	-4.5625e-11	-3.65625e-11	-3.3125e-11	-3.65625e-11	-3.5625e-11	-3.9375e-11
-8.03125e-11	-7.21875e-11	-6.34375e-11	-5.53125e-11	-5.5625e-11	-5.15625e-11	-5.5e-11	-5.96875e-11	-6.15625e-11	-5.5625e-11	-6.0625e-11	-6.59375e-11	-5.6875e-11		-4.15625e-11	-4.84375e-11	-4.34375e-11	-4.4375e-11	-4.3125e-11	-4.21875e-11	-4.09375e-11	-4.6875e-11	-4.03125e-11	-3.71875e-11	-3.5e-11	-4.125e-11	-4.03125e-11
-8.03125e-11	-7.09375e-11	-6.1875e-11	-5.625e-11	-5.21875e-11	-5.9375e-11	-5.5625e-11	-6.0625e-11	-6.15625e-11	-5.40625e-11	-5.3125e-11	-6.5e-11	-5.78125e-11		-4.75e-11	-5.0625e-11	-4.34375e-11	-4.34375e-11	-3.625e-11	-4.0625e-11	-4.28125e-11	-4.5e-11	-4.28125e-11	-4.03125e-11	-3.0625e-11	-4.40625e-11	-4.1875e-11
-6.84375e-11	-7.21875e-11	-6.65625e-11	-6.28125e-11	-4.875e-11	-4.84375e-11	-5.4375e-11	-5.59375e-11	-6.65625e-11	-5.59375e-11	-5.6875e-11	-6.40625e-11	-6.15625e-11		-4.65625e-11	-4.0625e-11	-4.375e-11	-4.15625e-11	-4.15625e-11	-3.9375e-11	-3.53125e-11	-4.0625e-11	-3.9375e-11	-3.6875e-11	-3.125e-11	-3.9375e-11	-4.03125e-11
-7.3125e-11	-7.15625e-11	-6.34375e-11	-6.15625e-11	-5.96875e-11	-6.03125e-11	-5.28125e-11	-5.3125e-11	-6.34375e-11	-5.34375e-11	-6.09375e-11	-6.875e-11	-5.59375e-11		-3.9375e-11	-3.96875e-11	-4.4375e-11	-4.0625e-11	-3.6875e-11	-3.9375e-11	-3.8125e-11	-4.15625e-11	-3.6875e-11	-4.15625e-11	-3.4375e-11	-3.5e-11	-4.40625e-11
-7.84375e-11	-7.25e-11	-7.09375e-11	-5.875e-11	-5.71875e-11	-6.46875e-11	-5.875e-11	-6.375e-11	-5.90625e-11	-5.3125e-11	-6.21875e-11	-6.78125e-11	-6.15625e-11		-4.09375e-11	-4.0625e-11	-3.8125e-11	-3.90625e-11	-4.25e-11	-3.8125e-11	-3.5e-11	-4.5e-11	-3.9375e-11	-3.90625e-11	-4.1875e-11	-3.84375e-11	-3.65625e-11
-8.03125e-11	-7.59375e-11	-7.375e-11	-6.28125e-11	-4.9375e-11	-5.375e-11	-5.46875e-11	-5.8125e-11	-5.84375e-11	-6.34375e-11	-6.15625e-11	-6.5e-11	-5.84375e-11		-4.40625e-11	-4.5e-11	-3.84375e-11	-4.03125e-11	-4.28125e-11	-3.9375e-11	-3.34375e-11	-4.625e-11	-4.09375e-11	-4.15625e-11	-4.0625e-11	-4.21875e-11	-3.28125e-11
-7.8125e-11	-7.375e-11	-6.625e-11	-5.84375e-11	-6.0625e-11	-5.6875e-11	-5.96875e-11	-6.78125e-11	-6.21875e-11	-5.34375e-11	-6.28125e-11	-6.25e-11	-5.46875e-11		-4.09375e-11	-4.09375e-11	-4.15625e-11	-3.8125e-11	-4.46875e-11	-4.03125e-11	-3.0625e-11	-4.4375e-11	-4.34375e-11	-4.28125e-11	-4.03125e-11	-3.65625e-11	-3.71875e-11
-8.5e-11	-7.5625e-11	-6.125e-11	-6.5e-11	-5.5e-11	-5.84375e-11	-5.65625e-11	-6.21875e-11	-6.28125e-11	-5.46875e-11	-5.75e-11	-6.75e-11	-5.78125e-11		-4.1875e-11	-4.03125e-11	-4.15625e-11	-3.875e-11	-4.5e-11	-3.78125e-11	-3.90625e-11	-4.21875e-11	-4.0625e-11	-3.59375e-11	-4.21875e-11	-3.65625e-11	-3.875e-11
-7.96875e-11	-7.125e-11	-6.84375e-11	-5.9375e-11	-6.03125e-11	-6.28125e-11	-5.5e-11	-6.28125e-11	-6.21875e-11	-6.09375e-11	-6.21875e-11	-7e-11	-5.59375e-11		-3.96875e-11	-4.375e-11	-4.03125e-11	-4.46875e-11	-4.03125e-11	-3.53125e-11	-4.125e-11	-3.9375e-11	-3.71875e-11	-3.09375e-11	-4.53125e-11	-3.40625e-11	-4.40625e-11
-8.40625e-11	-6.53125e-11	-7.09375e-11	-6.15625e-11	-5.9375e-11	-6.5e-11	-5e-11	-6.0625e-11	-6.3125e-11	-6.5e-11	-5.96875e-11	-6.5e-11	-6.40625e-11		-4.375e-11	-4.1875e-11	-4.0625e-11	-4.78125e-11	-4.28125e-11	-3.875e-11	-4.3125e-11	-3.84375e-11	-3.5625e-11	-3.5e-11	-3.84375e-11	-4e-11	-4.28125e-11
-8.0625e-11	-6.65625e-11	-6.53125e-11	-6.28125e-11	-5.3125e-11	-6.0625e-11	-5.65625e-11	-6.15625e-11	-6.40625e-11	-5.5625e-11	-5.59375e-11	-6.28125e-11	-5.09375e-11		-4.21875e-11	-4.03125e-11	-3.75e-11	-4.03125e-11	-4.375e-11	-4.21875e-11	-4.375e-11	-3.75e-11	-3.625e-11	-3.84375e-11	-3.1875e-11	-3.78125e-11	-4.0625e-11
-7.9375e-11	-6.65625e-11	-7.25e-11	-6.46875e-11	-4.84375e-11	-6.46875e-11	-5.90625e-11	-5.875e-11	-6.375e-11	-5.84375e-11	-6.4375e-11	-6.71875e-11	-5.75e-11		-4.4375e-11	-4.4375e-11	-3.84375e-11	-3.8125e-11	-4.53125e-11	-4.5e-11	-4.3125e-11	-4.125e-11	-4.28125e-11	-4.1875e-11	-3.5e-11	-3.84375e-11	-3.5625e-11
-7.46875e-11	-6.5e-11	-6.71875e-11	-5.84375e-11	-5.71875e-11	-5.3125e-11	-5.8125e-11	-5.84375e-11	-6.15625e-11	-5.6875e-11	-5.96875e-11	-6.5e-11	-5.875e-11		-4.875e-11	-4.59375e-11	-4.21875e-11	-4.28125e-11	-4.40625e-11	-4.53125e-11	-4.03125e-11	-4.78125e-11	-3.53125e-11	-3.84375e-11	-3.6875e-11	-4.15625e-11	-3.6875e-11
-7.65625e-11	-6.75e-11	-6.375e-11	-5.5e-11	-5.5e-11	-6.0625e-11	-5.1875e-11	-5.71875e-11	-6.53125e-11	-5.34375e-11	-6e-11	-6.15625e-11	-5.8125e-11		-4.3125e-11	-4.28125e-11	-4.1875e-11	-4.65625e-11	-4.03125e-11	-3.6875e-11	-4.53125e-11	-4.59375e-11	-3.78125e-11	-3.40625e-11	-3.78125e-11	-4.21875e-11	-4.03125e-11
-7.46875e-11	-7.75e-11	-6.75e-11	-6.03125e-11	-6.03125e-11	-5.21875e-11	-5.59375e-11	-6.21875e-11	-6.3125e-11	-5.625e-11	-5.78125e-11	-7.09375e-11	-5.1875e-11		-4.46875e-11	-4.375e-11	-4.0625e-11	-4.3125e-11	-4.03125e-11	-4.03125e-11	-3.71875e-11	-4.21875e-11	-4.28125e-11	-3.96875e-11	-4.15625e-11	-3.6875e-11	-3.84375e-11
-7.4375e-11	-6.125e-11	-7.5625e-11	-6.375e-11	-5.46875e-11	-5.9375e-11	-4.5e-11	-5.71875e-11	-6.28125e-11	-5.34375e-11	-5.875e-11	-6.8125e-11	-5.90625e-11		-4.53125e-11	-4.03125e-11	-4.59375e-11	-4.03125e-11	-4.375e-11	-4.28125e-11	-3.59375e-11	-4.21875e-11	-4.625e-11	-4.28125e-11	-4.34375e-11	-3.53125e-11	-4.03125e-11
-7.53125e-11	-7.3125e-11	-6.875e-11	-5.875e-11	-5.5e-11	-6.5e-11	-5.28125e-11	-5.28125e-11	-5.21875e-11	-5.65625e-11	-6.15625e-11	-6.5625e-11	-5.6875e-11		-4.25e-11	-4.1875e-11	-4.40625e-11	-3.96875e-11	-4.375e-11	-4.25e-11	-4.375e-11	-4.71875e-11	-4e-11	-4.03125e-11	-4.375e-11	-3.90625e-11	-3.71875e-11
-7.59375e-11	-6.6875e-11	-7.4375e-11	-6.1875e-11	-5.84375e-11	-5.75e-11	-5.4375e-11	-6.3125e-11	-6.71875e-11	-5.71875e-11	-6.28125e-11	-6.78125e-11	-6.03125e-11		-4.28125e-11	-4.03125e-11	-3.9375e-11	-4.09375e-11	-4.1875e-11	-4.5e-11	-4.15625e-11	-4.1875e-11	-4.09375e-11	-4.28125e-11	-3.65625e-11	-4.15625e-11	-3.71875e-11
-7.78125e-11	-6.9375e-11	-7.3125e-11	-6.34375e-11	-5.71875e-11	-6.375e-11	-6e-11	-5.21875e-11	-5.875e-11	-5.03125e-11	-5.59375e-11	-6.59375e-11	-5.40625e-11		-4.34375e-11	-4.25e-11	-4.0625e-11	-3.59375e-11	-4.28125e-11	-4.28125e-11	-3.65625e-11	-4.5e-11	-4.375e-11	-4.0625e-11	-3.21875e-11	-3.875e-11	-3.4375e-11
-7.375e-11	-6.53125e-11	-7.28125e-11	-5.5e-11	-5.53125e-11	-5.875e-11	-6.625e-11	-6.15625e-11	-5.78125e-11	-5.78125e-11	-6.1875e-11	-6.40625e-11	-6.03125e-11		-4.5e-11	-4.03125e-11	-4.03125e-11	-3.5e-11	-4.34375e-11	-4.21875e-11	-3.34375e-11	-4.375e-11	-4.1875e-11	-4.0625e-11	-3.40625e-11	-3.65625e-11	-3.8125e-11
-7.8125e-11	-7.25e-11	-7.34375e-11	-6.71875e-11	-5.03125e-11	-6.4375e-11	-5.9375e-11	-5.15625e-11	-6.75e-11	-6.09375e-11	-6.21875e-11	-6.71875e-11	-5.71875e-11		-3.8125e-11	-4.65625e-11	-3.84375e-11	-4.21875e-11	-4.53125e-11	-4.1875e-11	-3.53125e-11	-4.5e-11	-4.03125e-11	-4.03125e-11	-4.15625e-11	-3.4375e-11	-3.65625e-11
-7.5625e-11	-6.6875e-11	-6.90625e-11	-6.15625e-11	-5.46875e-11	-5.34375e-11	-6.28125e-11	-6.59375e-11	-6.71875e-11	-6.0625e-11	-5.125e-11	-6.8125e-11	-6.0625e-11		-3.75e-11	-4.53125e-11	-4.3125e-11	-4.3125e-11	-4.1875e-11	-3.875e-11	-3.46875e-11	-4.5e-11	-4.40625e-11	-3.5e-11	-4.34375e-11	-3.71875e-11	-4.09375e-11
-7.84375e-11	-6.28125e-11	-7.3125e-11	-6.21875e-11	-5.09375e-11	-5.3125e-11	-5.5625e-11	-6.3125e-11	-6.125e-11	-5.21875e-11	-5.75e-11	-6.90625e-11	-5.34375e-11		-4.21875e-11	-4.5625e-11	-4.6875e-11	-3.84375e-11	-4.15625e-11	-4.21875e-11	-4.03125e-11	-4.46875e-11	-3.9375e-11	-3.625e-11	-4.15625e-11	-3.875e-11	-3.71875e-11
-7.65625e-11	-6.78125e-11	-7.03125e-11	-5.78125e-11	-5.09375e-11	-6e-11	-5.59375e-11	-5.9375e-11	-6.34375e-11	-6.40625e-11	-6.3125e-11	-6.5e-11	-5.53125e-11		-4.40625e-11	-4.84375e-11	-4.3125e-11	-4.03125e-11	-4.34375e-11	-4.28125e-11	-3.84375e-11	-4.46875e-11	-4.03125e-11	-3.875e-11	-3.875e-11	-3.90625e-11	-4.28125e-11
-8.03125e-11	-6.53125e-11	-7.34375e-11	-5.71875e-11	-6.03125e-11	-6.03125e-11	-5.71875e-11	-5.6875e-11	-5.65625e-11	-6.34375e-11	-6.28125e-11	-5.78125e-11	-5.53125e-11		-4.09375e-11	-4.3125e-11	-4.03125e-11	-3.90625e-11	-4.5e-11	-4.1875e-11	-4.03125e-11	-4.4375e-11	-4.125e-11	-3.875e-11	-3.6875e-11	-3.1875e-11	-3.75e-11
-8.59375e-11	-6.09375e-11	-7.0625e-11	-5.03125e-11	-5.46875e-11	-6.03125e-11	-6.03125e-11	-5.5e-11	-6.53125e-11	-5.96875e-11	-6.21875e-11	-5.6875e-11	-5.3125e-11		-4.34375e-11	-3.75e-11	-3.78125e-11	-3.78125e-11	-4.53125e-11	-4.03125e-11	-3.84375e-11	-4.5e-11	-4.15625e-11	-4.28125e-11	-3.4375e-11	-3.34375e-11	-3.6875e-11
-7.6875e-11	-6.84375e-11	-6.96875e-11	-6.28125e-11	-5.5e-11	-5.75e-11	-6.15625e-11	-6.75e-11	-5.90625e-11	-5.625e-11	-5.875e-11	-6.0625e-11	-5.625e-11		-4.53125e-11	-4.09375e-11	-3.75e-11	-4.21875e-11	-4.28125e-11	-3.90625e-11	-3.9375e-11	-4.34375e-11	-4.625e-11	-4.5e-11	-3.65625e-11	-3.71875e-11	-3.1875e-11
-8.03125e-11	-6.5e-11	-7.34375e-11	-6.15625e-11	-5.6875e-11	-6.46875e-11	-6.40625e-11	-5.59375e-11	-5.78125e-11	-5.84375e-11	-6.5e-11	-6.3125e-11	-5.59375e-11		-4.6875e-11	-4.53125e-11	-4.09375e-11	-4.375e-11	-4.25e-11	-3.875e-11	-4.03125e-11	-3.78125e-11	-4.4375e-11	-4.15625e-11	-3.40625e-11	-4.15625e-11	-3.4375e-11
-7.5e-11	-6.84375e-11	-6.90625e-11	-6.09375e-11	-6.0625e-11	-6.03125e-11	-5.34375e-11	-6.25e-11	-6.15625e-11	-5.96875e-11	-6.1875e-11	-6.78125e-11	-5.46875e-11		-3.96875e-11	-4.5e-11	-4.125e-11	-4.6875e-11	-4.5e-11	-4.15625e-11	-4.09375e-11	-3.9375e-11	-4.28125e-11	-3.40625e-11	-3.40625e-11	-3.4375e-11	-3.84375e-11
-7.59375e-11	-7.40625e-11	-7.53125e-11	-6.03125e-11	-5.375e-11	-5.65625e-11	-5.34375e-11	-6.3125e-11	-5.9375e-11	-5.71875e-11	-5.65625e-11	-6.71875e-11	-5.8125e-11		-4.40625e-11	-4.09375e-11	-3.75e-11	-4.3125e-11	-4.46875e-11	-4.40625e-11	-4.15625e-11	-4.03125e-11	-4.125e-11	-3.65625e-11	-3.71875e-11	-3.90625e-11	-3.8125e-11
-7.78125e-11	-6.15625e-11	-7e-11	-6.40625e-11	-5.4375e-11	-6.40625e-11	-5.59375e-11	-5.8125e-11	-5.625e-11	-5.53125e-11	-6.4375e-11	-6.71875e-11	-6.1875e-11		-4.375e-11	-4.53125e-11	-3.65625e-11	-4.34375e-11	-4.4375e-11	-4.21875e-11	-3.90625e-11	-4.28125e-11	-3.84375e-11	-3.6875e-11	-4.40625e-11	-4.15625e-11	-4.1875e-11
-7.28125e-11	-6.90625e-11	-7.5625e-11	-5.4375e-11	-5.84375e-11	-6.5e-11	-5.71875e-11	-6.15625e-11	-5.9375e-11	-5.625e-11	-6.375e-11	-7.34375e-11	-5.78125e-11		-4.21875e-11	-4.6875e-11	-4.125e-11	-3.90625e-11	-4.5625e-11	-4.1875e-11	-3.9375e-11	-4.46875e-11	-4.15625e-11	-3.65625e-11	-4.21875e-11	-4.25e-11	-3.875e-11
-7.5625e-11	-6.28125e-11	-7.28125e-11	-6.3125e-11	-4.96875e-11	-5.78125e-11	-6.15625e-11	-5.8125e-11	-6.375e-11	-5.5625e-11	-6.59375e-11	-6.90625e-11	-5.6875e-11		-4.53125e-11	-4.46875e-11	-4.46875e-11	-3.78125e-11	-4.125e-11	-4.21875e-11	-4.03125e-11	-4.1875e-11	-4.03125e-11	-3.46875e-11	-3.53125e-11	-3.59375e-11	-3.5e-11
-7.5e-11	-6.625e-11	-6.9375e-11	-5.28125e-11	-5.25e-11	-6.21875e-11	-5.34375e-11	-6.5e-11	-6.625e-11	-5.28125e-11	-6.3125e-11	-7.1875e-11	-5.0625e-11		-4.4375e-11	-4.5e-11	-3.40625e-11	-4.15625e-11	-4.0625e-11	-4.28125e-11	-4.28125e-11	-4.28125e-11	-3.75e-11	-3.8125e-11	-3.9375e-11	-3.71875e-11	-3.84375e-11
-7.59375e-11	-6.53125e-11	-6.5e-11	-6.59375e-11	-5.21875e-11	-5.625e-11	-5.46875e-11	-5.5e-11	-6.4375e-11	-5.5625e-11	-5.53125e-11	-6.53125e-11	-5.75e-11		-4.4375e-11	-4.25e-11	-3.59375e-11	-4.46875e-11	-4.0625e-11	-3.59375e-11	-4.125e-11	-4.6875e-11	-3.78125e-11	-4.03125e-11	-3.53125e-11	-3.5e-11	-4.03125e-11
-7.25e-11	-7e-11	-6.5e-11	-5.90625e-11	-5.59375e-11	-6.46875e-11	-5.84375e-11	-6.28125e-11	-6.625e-11	-6.09375e-11	-6.5e-11	-7e-11	-5.4375e-11		-4.1875e-11	-4.46875e-11	-4.0625e-11	-4.28125e-11	-4.4375e-11	-4.09375e-11	-4.375e-11	-3.90625e-11	-3.65625e-11	-3.78125e-11	-3.46875e-11	-3.90625e-11	-3.78125e-11
-7.96875e-11	-6.5625e-11	-6.6875e-11	-6.03125e-11	-5.90625e-11	-6.09375e-11	-5.59375e-11	-5.28125e-11	-6.40625e-11	-5.28125e-11	-5.40625e-11	-7e-11	-5.46875e-11		-4.5e-11	-4.125e-11	-4.40625e-11	-4.03125e-11	-3.625e-11	-4.28125e-11	-3.6875e-11	-3.78125e-11	-4.375e-11	-4.28125e-11	-3.71875e-11	-3.65625e-11	-3.59375e-11
-7.8125e-11	-6.21875e-11	-7.15625e-11	-6.84375e-11	-5.71875e-11	-5.9375e-11	-5.96875e-11	-5.875e-11	-5.8125e-11	-5.3125e-11	-6.03125e-11	-6.96875e-11	-5.375e-11		-4.3125e-11	-4.46875e-11	-4.65625e-11	-3.5625e-11	-3.625e-11	-4.03125e-11	-3.34375e-11	-3.9375e-11	-4.25e-11	-4.25e-11	-3.78125e-11	-3.78125e-11	-3.53125e-11
-6.6875e-11	-6.34375e-11	-7e-11	-5.84375e-11	-5.21875e-11	-6.3125e-11	-5.9375e-11	-5.8125e-11	-5.90625e-11	-5.84375e-11	-6.375e-11	-6.5e-11	-6.625e-11		-4.21875e-11	-4.59375e-11	-5.03125e-11	-3.65625e-11	-4.34375e-11	-4.0625e-11	-3.53125e-11	-4.15625e-11	-4.03125e-11	-3.4375e-11	-3.46875e-11	-3.8125e-11	-4.03125e-11
-7.375e-11	-6.4375e-11	-7.15625e-11	-6.46875e-11	-5.15625e-11	-5.90625e-11	-5.375e-11	-6.03125e-11	-6.125e-11	-6.25e-11	-6.28125e-11	-6.46875e-11	-6e-11		-4.4375e-11	-4.34375e-11	-4.21875e-11	-4.03125e-11	-4.46875e-11	-3.71875e-11	-3.9375e-11	-4.34375e-11	-3.875e-11	-2.8125e-11	-3.71875e-11	-4.21875e-11	-3.375e-11
-7.71875e-11	-7.28125e-11	-7.78125e-11	-6.90625e-11	-5.5e-11	-6.71875e-11	-5.46875e-11	-5.84375e-11	-6.34375e-11	-5.28125e-11	-6.09375e-11	-6.59375e-11	-5.96875e-11		-4.53125e-11	-4.375e-11	-4.03125e-11	-3.5625e-11	-4.65625e-11	-4.03125e-11	-4.125e-11	-4.34375e-11	-4.0625e-11	-3.59375e-11	-3.90625e-11	-4.15625e-11	-3.40625e-11
-7.125e-11	-7.4375e-11	-6.71875e-11	-5.46875e-11	-5e-11	-6.5625e-11	-5.5e-11	-6.0625e-11	-6.03125e-11	-5.84375e-11	-5.84375e-11	-6.0625e-11	-5.9375e-11		-4.40625e-11	-4.15625e-11	-4.34375e-11	-4.125e-11	-3.9375e-11	-4.5e-11	-4.40625e-11	-4.1875e-11	-4.40625e-11	-3.8125e-11	-3.9375e-11	-3.71875e-11	-4.4375e-11
-7.6875e-11	-6.71875e-11	-7.3125e-11	-6.09375e-11	-5.6875e-11	-6.375e-11	-5.90625e-11	-5.6875e-11	-5.3125e-11	-5.5625e-11	-5.90625e-11	-6.1875e-11	-6.21875e-11		-4.09375e-11	-4.21875e-11	-3.84375e-11	-4.4375e-11	-3.46875e-11	-4.46875e-11	-3.53125e-11	-4.15625e-11	-4.28125e-11	-3.8125e-11	-3.875e-11	-3.625e-11	-4.0625e-11
-7.71875e-11	-6.625e-11	-7.1875e-11	-6.09375e-11	-6.125e-11	-5.78125e-11	-5.6875e-11	-5.65625e-11	-6.21875e-11	-5.28125e-11	-6.15625e-11	-6.4375e-11	-6.90625e-11		-4.25e-11	-4.65625e-11	-4.03125e-11	-4.28125e-11	-3.8125e-11	-4.09375e-11	-4.15625e-11	-3.96875e-11	-4.15625e-11	-3.625e-11	-3.125e-11	-4.21875e-11	-4.21875e-11
-7.5e-11	-6.78125e-11	-7.03125e-11	-6.34375e-11	-5.9375e-11	-6.21875e-11	-5.40625e-11	-5.90625e-11	-6.40625e-11	-5.6875e-11	-5.90625e-11	-6.78125e-11	-6.09375e-11		-4.4375e-11	-4.46875e-11	-4.03125e-11	-4.28125e-11	-4.21875e-11	-3.78125e-11	-3.46875e-11	-4.4375e-11	-3.84375e-11	-3.5e-11	-3.5e-11	-4.1875e-11	-4.4375e-11
-7.3125e-11	-6.96875e-11	-7.3125e-11	-6.3125e-11	-5.78125e-11	-6.3125e-11	-5.71875e-11	-5.9375e-11	-5.46875e-11	-5.5625e-11	-5.90625e-11	-6.78125e-11	-5.71875e-11		-4.21875e-11	-3.875e-11	-4.03125e-11	-4.375e-11	-4.46875e-11	-4.1875e-11	-3.5e-11	-3.78125e-11	-3.9375e-11	-3.71875e-11	-4.25e-11	-3.21875e-11	-3.75e-11
-7.84375e-11	-6.8125e-11	-5.84375e-11	-5.9375e-11	-5.21875e-11	-6.25e-11	-5.6875e-11	-5.71875e-11	-6.21875e-11	-6.21875e-11	-5.46875e-11	-5.75e-11	-6.28125e-11		-4.125e-11	-4.15625e-11	-4.28125e-11	-4.25e-11	-4.59375e-11	-4.03125e-11	-3.9375e-11	-4.1875e-11	-4.03125e-11	-3.78125e-11	-4.0625e-11	-3.375e-11	-3.28125e-11
-7.8125e-11	-6.4375e-11	-6.96875e-11	-5.5e-11	-6.71875e-11	-5.96875e-11	-5.15625e-11	-5.59375e-11	-6.28125e-11	-5.5e-11	-6.15625e-11	-6.75e-11	-6.25e-11		-4.65625e-11	-4.40625e-11	-4.09375e-11	-4.3125e-11	-4.53125e-11	-3.40625e-11	-4.21875e-11	-4.90625e-11	-3.875e-11	-4.40625e-11	-3.71875e-11	-3.34375e-11	-3.40625e-11
-7.625e-11	-7.09375e-11	-7.4375e-11	-6.4375e-11	-5.59375e-11	-5.875e-11	-5.78125e-11	-6.1875e-11	-6.21875e-11	-5.875e-11	-5.34375e-11	-6.53125e-11	-5.46875e-11		-4.6875e-11	-3.5625e-11	-4.375e-11	-4.59375e-11	-4.1875e-11	-3.5625e-11	-4.09375e-11	-4.1875e-11	-3.84375e-11	-3.5e-11	-3.9375e-11	-3.65625e-11	-3.96875e-11
-7.6875e-11	-6.3125e-11	-6.21875e-11	-6.34375e-11	-6.40625e-11	-6.28125e-11	-6.46875e-11	-6.15625e-11	-6.09375e-11	-5.28125e-11	-6.09375e-11	-6.40625e-11	-5.75e-11		-4.15625e-11	-4.21875e-11	-3.40625e-11	-4.28125e-11	-3.71875e-11	-4.15625e-11	-3.6875e-11	-3.5e-11	-3.90625e-11	-3.65625e-11	-4.3125e-11	-3.46875e-11	-4.125e-11
-7.1875e-11	-6.78125e-11	-6.375e-11	-5.90625e-11	-5.71875e-11	-6.4375e-11	-5.5625e-11	-5.46875e-11	-6.3125e-11	-5.3125e-11	-5.625e-11	-6.4375e-11	-5.8125e-11		-3.875e-11	-4.75e-11	-3.375e-11	-4.1875e-11	-3.65625e-11	-4.4375e-11	-3.5625e-11	-3.71875e-11	-3.53125e-11	-4.03125e-11	-3.84375e-11	-3.5625e-11	-3.6875e-11
-7.34375e-11	-7e-11	-6.96875e-11	-6.09375e-11	-5.78125e-11	-5.40625e-11	-5.09375e-11	-6e-11	-6.375e-11	-5.4375e-11	-5.84375e-11	-6.0625e-11	-5.3125e-11		-4.1875e-11	-4.53125e-11	-4.34375e-11	-4.40625e-11	-4.125e-11	-4.34375e-11	-3.8125e-11	-3.9375e-11	-3.84375e-11	-4.1875e-11	-4.1875e-11	-4.34375e-11	-3.65625e-11
-7.625e-11	-6.90625e-11	-7.78125e-11	-6.09375e-11	-5.90625e-11	-5.6875e-11	-5.3125e-11	-5.96875e-11	-6.3125e-11	-5.0625e-11	-6.15625e-11	-6.1875e-11	-6.5e-11		-4.46875e-11	-4.4375e-11	-4.40625e-11	-3.78125e-11	-4.1875e-11	-3.5625e-11	-4.09375e-11	-4.59375e-11	-4.03125e-11	-3.96875e-11	-3.75e-11	-4.46875e-11	-3.90625e-11
-7.09375e-11	-6.8125e-11	-7.25e-11	-6.5e-11	-6.125e-11	-6.53125e-11	-4.90625e-11	-5.53125e-11	-6.125e-11	-5.6875e-11	-5.53125e-11	-6.3125e-11	-6.40625e-11		-4.65625e-11	-3.65625e-11	-4.15625e-11	-4.0625e-11	-4.625e-11	-3.8125e-11	-4.03125e-11	-4.65625e-11	-4.59375e-11	-4.40625e-11	-3.90625e-11	-4.15625e-11	-3.5625e-11
-7.5625e-11	-6.25e-11	-6.90625e-11	-6.28125e-11	-5.5625e-11	-6.46875e-11	-5.4375e-11	-6.03125e-11	-6.125e-11	-6.21875e-11	-5.8125e-11	-6.28125e-11	-5.9375e-11		-4.40625e-11	-3.84375e-11	-3.75e-11	-3.9375e-11	-4.5e-11	-4.40625e-11	-4.03125e-11	-4.84375e-11	-3.71875e-11	-3.90625e-11	-3.84375e-11	-4.125e-11	-3.84375e-11
-7e-11	-6.34375e-11	-7.0625e-11	-6.6875e-11	-5.6875e-11	-6.09375e-11	-5.375e-11	-6.375e-11	-6.03125e-11	-6.15625e-11	-5.78125e-11	-6.46875e-11	-5.6875e-11		-4.03125e-11	-4.40625e-11	-4.34375e-11	-3.65625e-11	-4.375e-11	-4.28125e-11	-4.40625e-11	-4.8125e-11	-3.71875e-11	-4.03125e-11	-3.78125e-11	-3.84375e-11	-4.03125e-11
-7.875e-11	-6.75e-11	-7.09375e-11	-6.65625e-11	-5.3125e-11	-6.125e-11	-5.84375e-11	-6.46875e-11	-6.40625e-11	-5.15625e-11	-6.09375e-11	-6.40625e-11	-6.375e-11		-3.71875e-11	-4.71875e-11	-4.53125e-11	-4.03125e-11	-4.84375e-11	-4.53125e-11	-3.84375e-11	-4.90625e-11	-4.4375e-11	-3.8125e-11	-3.65625e-11	-3.65625e-11	-3.78125e-11
-7.375e-11	-6.1875e-11	-6.71875e-11	-5.75e-11	-5.90625e-11	-6.21875e-11	-5.5e-11	-6e-11	-6.34375e-11	-5.28125e-11	-5.875e-11	-6.34375e-11	-5.9375e-11		-4.09375e-11	-4.40625e-11	-4.125e-11	-3.8125e-11	-4.53125e-11	-4.28125e-11	-3.875e-11	-4.84375e-11	-4.34375e-11	-3.59375e-11	-3.71875e-11	-4.1875e-11	-3.84375e-11
-7.5e-11	-6.75e-11	-7.28125e-11	-5.78125e-11	-5.8125e-11	-5.71875e-11	-5.84375e-11	-6.53125e-11	-6.25e-11	-5.84375e-11	-5.875e-11	-6.0625e-11	-5.40625e-11		-4.40625e-11	-4.8125e-11	-4.53125e-11	-3.90625e-11	-3.90625e-11	-4.21875e-11	-4.4375e-11	-4.40625e-11	-4.3125e-11	-3.4375e-11	-3.9375e-11	-3.65625e-11	-4.15625e-11
-7.5e-11	-7.15625e-11	-6.46875e-11	-6.25e-11	-5.34375e-11	-5.9375e-11	-4.9375e-11	-5.84375e-11	-5.5e-11	-6.90625e-11	-5.4375e-11	-5.4375e-11	-5.90625e-11		-4.78125e-11	-4.375e-11	-4.21875e-11	-4.28125e-11	-3.84375e-11	-4.1875e-11	-4.1875e-11	-3.96875e-11	-3.625e-11	-3.5625e-11	-4.1875e-11	-3.59375e-11	-4.09375e-11
-6.9375e-11	-6.25e-11	-5.96875e-11	-5.46875e-11	-5.4375e-11	-5.90625e-11	-5.6875e-11	-6.09375e-11	-6.40625e-11	-5.71875e-11	-6.0625e-11	-5.90625e-11	-5.6875e-11		-4.03125e-11	-4.15625e-11	-4.1875e-11	-4.34375e-11	-4.34375e-11	-4.03125e-11	-4.125e-11	-3.65625e-11	-3.21875e-11	-4.03125e-11	-3.71875e-11	-3.53125e-11	-3.5625e-11
-7.90625e-11	-6.375e-11	-6.59375e-11	-6.25e-11	-5.65625e-11	-6.3125e-11	-5.96875e-11	-5.90625e-11	-7.40625e-11	-6.03125e-11	-5.34375e-11	-6e-11	-5.3125e-11		-4.4375e-11	-4.0625e-11	-4.75e-11	-4.09375e-11	-4.375e-11	-3.96875e-11	-3.90625e-11	-4.15625e-11	-3.34375e-11	-3.90625e-11	-3.84375e-11	-3.6875e-11	-3.65625e-11
-6.96875e-11	-7.125e-11	-7.375e-11	-6.59375e-11	-5.59375e-11	-5.65625e-11	-5.15625e-11	-5.59375e-11	-6.34375e-11	-5.78125e-11	-5.84375e-11	-6.90625e-11	-5.53125e-11		-4.375e-11	-3.90625e-11	-4.59375e-11	-4.28125e-11	-4.0625e-11	-4.15625e-11	-3.6875e-11	-3.875e-11	-3.875e-11	-3.5625e-11	-3.71875e-11	-4.03125e-11	-4e-11
-7.59375e-11	-6.34375e-11	-6.5e-11	-6.03125e-11	-6.65625e-11	-6.09375e-11	-5.46875e-11	-6.8125e-11	-5.9375e-11	-5.96875e-11	-5.6875e-11	-6.46875e-11	-6.03125e-11		-4.53125e-11	-4.1875e-11	-4.625e-11	-4.3125e-11	-3.8125e-11	-4.0625e-11	-3.46875e-11	-3.6875e-11	-4.53125e-11	-3.53125e-11	-3.5e-11	-3.90625e-11	-3.71875e-11
-7.0625e-11	-7.1875e-11	-6.71875e-11	-5.15625e-11	-5.875e-11	-6.15625e-11	-5.71875e-11	-5.90625e-11	-6.09375e-11	-5.53125e-11	-5.96875e-11	-6.5e-11	-5.6875e-11		-3.6875e-11	-4.84375e-11	-4.28125e-11	-4.03125e-11	-4.15625e-11	-3.71875e-11	-3.90625e-11	-4.25e-11	-4.15625e-11	-3.875e-11	-3.75e-11	-3.9375e-11	-3.46875e-11
-7.46875e-11	-6.71875e-11	-6.34375e-11	-6.53125e-11	-6.1875e-11	-5.78125e-11	-5.1875e-11	-6.4375e-11	-6.3125e-11	-5.28125e-11	-6e-11	-5.90625e-11	-6.5e-11		-4.03125e-11	-4.5e-11	-4.03125e-11	-4.09375e-11	-4.21875e-11	-3.75e-11	-4.21875e-11	-4.3125e-11	-4.0625e-11	-3.8125e-11	-3.40625e-11	-3.53125e-11	-3.5625e-11
-7.3125e-11	-6.90625e-11	-6.71875e-11	-6.3125e-11	-6.34375e-11	-6.09375e-11	-5.65625e-11	-6.21875e-11	-6.28125e-11	-6.0625e-11	-5.8125e-11	-6e-11	-6.59375e-11		-4.375e-11	-3.78125e-11	-4.34375e-11	-4.65625e-11	-4.03125e-11	-4.28125e-11	-4.125e-11	-4.71875e-11	-4.625e-11	-3.75e-11	-3.6875e-11	-3.65625e-11	-4.0625e-11
-8.03125e-11	-6.34375e-11	-6.46875e-11	-6.28125e-11	-5.40625e-11	-5.84375e-11	-6.34375e-11	-5.96875e-11	-6.46875e-11	-5.8125e-11	-6.5625e-11	-6.96875e-11	-5.6875e-11		-3.84375e-11	-4.15625e-11	-4.40625e-11	-4.25e-11	-4.25e-11	-4.46875e-11	-3.5e-11	-4.5625e-11	-4.28125e-11	-3.84375e-11	-3.6875e-11	-3.90625e-11	-4.21875e-11
-7.4375e-11	-6.875e-11	-6.65625e-11	-6.25e-11	-5.96875e-11	-6.71875e-11	-5.25e-11	-5.65625e-11	-6.4375e-11	-5.96875e-11	-5.6875e-11	-6.5e-11	-6.8125e-11		-4.21875e-11	-4.5e-11	-4e-11	-3.84375e-11	-4.53125e-11	-4.53125e-11	-4.4375e-11	-4.0625e-11	-3.90625e-11	-4.28125e-11	-3.875e-11	-3.53125e-11	-4.03125e-11
-7.1875e-11	-6.1875e-11	-6.03125e-11	-5.65625e-11	-5.875e-11	-5.96875e-11	-5.9375e-11	-6.5625e-11	-6.15625e-11	-6.5e-11	-6.03125e-11	-6.21875e-11	-5.78125e-11		-4.53125e-11	-4.375e-11	-4.1875e-11	-4.28125e-11	-4.0625e-11	-4.09375e-11	-4.40625e-11	-4.03125e-11	-3.96875e-11	-3.90625e-11	-4.0625e-11	-2.96875e-11	-3.625e-11
-7.21875e-11	-6.71875e-11	-6.5e-11	-6.46875e-11	-4.96875e-11	-6.40625e-11	-6.0625e-11	-5.9375e-11	-6.0625e-11	-6.09375e-11	-6.5625e-11	-6.15625e-11	-6.0625e-11		-4.5625e-11	-4.5625e-11	-4.59375e-11	-4.34375e-11	-4.15625e-11	-3.78125e-11	-3.90625e-11	-4.1875e-11	-3.65625e-11	-3.90625e-11	-3.71875e-11	-3.3125e-11	-3.875e-11
-7.5e-11	-6.3125e-11	-6.78125e-11	-6.625e-11	-6.5e-11	-6.03125e-11	-6e-11	-6.15625e-11	-7e-11	-5.875e-11	-5.65625e-11	-7.0625e-11	-6.15625e-11		-4.21875e-11	-4.8125e-11	-4.40625e-11	-3.65625e-11	-4.21875e-11	-4.03125e-11	-3.71875e-11	-4.5625e-11	-3.46875e-11	-3.375e-11	-4.21875e-11	-3.71875e-11	-3.5625e-11
-7.34375e-11	-6.34375e-11	-6.8125e-11	-6.03125e-11	-6.375e-11	-6.09375e-11	-5.15625e-11	-6.03125e-11	-5.78125e-11	-5.59375e-11	-5.5e-11	-6.46875e-11	-5.59375e-11		-3.78125e-11	-4.40625e-11	-3.96875e-11	-3.40625e-11	-4.5e-11	-4.21875e-11	-4.40625e-11	-4.3125e-11	-3.875e-11	-3.65625e-11	-3.84375e-11	-4.3125e-11	-3.53125e-11
-7.03125e-11	-7.46875e-11	-6.5625e-11	-6.0625e-11	-5.78125e-11	-5.75e-11	-5.78125e-11	-5.75e-11	-6.25e-11	-6.375e-11	-5.90625e-11	-6.75e-11	-6e-11		-4.1875e-11	-4.09375e-11	-4.4375e-11	-4.03125e-11	-4.53125e-11	-3.78125e-11	-4.40625e-11	-4.21875e-11	-4.03125e-11	-3.78125e-11	-3.9375e-11	-3.96875e-11	-3.9375e-11
-7.84375e-11	-6.84375e-11	-6.59375e-11	-6.03125e-11	-6.1875e-11	-5.8125e-11	-5.34375e-11	-6.65625e-11	-5.5625e-11	-5.5e-11	-5.96875e-11	-6.34375e-11	-5.96875e-11		-5.09375e-11	-4.15625e-11	-4.0625e-11	-3.9375e-11	-4.65625e-11	-3.6875e-11	-3.59375e-11	-3.9375e-11	-4.1875e-11	-3.84375e-11	-3.8125e-11	-3.625e-11	-3.6875e-11
-6.34375e-11	-6.96875e-11	-6.4375e-11	-6.65625e-11	-6e-11	-6.1875e-11	-5.875e-11	-6.34375e-11	-7e-11	-5.84375e-11	-6.09375e-11	-6.0625e-11	-5.34375e-11		-4.40625e-11	-3.8125e-11	-3.875e-11	-4.71875e-11	-4.0625e-11	-3.625e-11	-3.875e-11	-3.9375e-11	-4.1875e-11	-3.78125e-11	-3.625e-11	-3.15625e-11	-3.53125e-11
-7.21875e-11	-6.28125e-11	-6.28125e-11	-6.1875e-11	-6.09375e-11	-6.21875e-11	-6.3125e-11	-6.71875e-11	-5.5625e-11	-5.625e-11	-6.03125e-11	-6.65625e-11	-6.59375e-11		-4.40625e-11	-4.21875e-11	-4.0625e-11	-4.15625e-11	-3.96875e-11	-3.5e-11	-4.03125e-11	-4.15625e-11	-3.9375e-11	-3.46875e-11	-3.65625e-11	-3.34375e-11	-3.6875e-11
-6.9375e-11	-6e-11	-7e-11	-6.03125e-11	-6.40625e-11	-6.53125e-11	-5.46875e-11	-6.4375e-11	-6.40625e-11	-6.0625e-11	-5.875e-11	-6.96875e-11	-5.78125e-11		-4.1875e-11	-4.34375e-11	-3.90625e-11	-4.09375e-11	-3.84375e-11	-3.5e-11	-4.15625e-11	-4.53125e-11	-4.03125e-11	-3.9375e-11	-4.15625e-11	-3.65625e-11	-3.9375e-11
-7.15625e-11	-6.15625e-11	-5.65625e-11	-5.78125e-11	-5.59375e-11	-5.9375e-11	-5.84375e-11	-6.1875e-11	-5.78125e-11	-6.09375e-11	-6.0625e-11	-6.6875e-11	-5.65625e-11		-4.0625e-11	-4.28125e-11	-4.125e-11	-4.0625e-11	-4.03125e-11	-4.53125e-11	-4.46875e-11	-4.40625e-11	-3.46875e-11	-3.84375e-11	-3.96875e-11	-3.84375e-11	-4.4375e-11
-6.46875e-11	-6.46875e-11	-6.53125e-11	-5.875e-11	-5.71875e-11	-5.65625e-11	-5.625e-11	-6.625e-11	-6.03125e-11	-6.25e-11	-5.4375e-11	-6.03125e-11	-5.59375e-11		-4.65625e-11	-4.78125e-11	-4.4375e-11	-3.5625e-11	-4.03125e-11	-4.0625e-11	-4.21875e-11	-4.5e-11	-3.5e-11	-3.78125e-11	-3.625e-11	-4.09375e-11	-4.375e-11
-7.375e-11	-7.34375e-11	-6.28125e-11	-6.1875e-11	-6.09375e-11	-6.09375e-11	-5.96875e-11	-6.0625e-11	-5.96875e-11	-5.71875e-11	-6.09375e-11	-5.96875e-11	-6.28125e-11		-4.59375e-11	-4.40625e-11	-4.375e-11	-3.875e-11	-4.96875e-11	-4.0625e-11	-4.71875e-11	-4.4375e-11	-4.3125e-11	-3.96875e-11	-4.21875e-11	-3.46875e-11	-3.625e-11
-7.5625e-11	-7e-11	-6.59375e-11	-6.4375e-11	-5.65625e-11	-5.40625e-11	-5.71875e-11	-5.9375e-11	-6.5e-11	-5.90625e-11	-6e-11	-6.40625e-11	-5.375e-11		-4.59375e-11	-4.09375e-11	-4.15625e-11	-4.53125e-11	-4.78125e-11	-4.1875e-11	-4.3125e-11	-4.40625e-11	-4.40625e-11	-3.78125e-11	-4.3125e-11	-4.21875e-11	-3.53125e-11
-8e-11	-6.90625e-11	-7.03125e-11	-6.28125e-11	-6.3125e-11	-6.34375e-11	-6.59375e-11	-6.375e-11	-6.09375e-11	-6.15625e-11	-5.71875e-11	-6.84375e-11	-5.28125e-11		-5.03125e-11	-4.53125e-11	-3.90625e-11	-4.5625e-11	-4.28125e-11	-3.84375e-11	-3.53125e-11	-4.09375e-11	-3.9375e-11	-3.78125e-11	-4.03125e-11	-4.15625e-11	-4.03125e-11
-7.28125e-11	-6.90625e-11	-7.21875e-11	-6.21875e-11	-5.65625e-11	-6.40625e-11	-5.59375e-11	-6.40625e-11	-6.375e-11	-6.28125e-11	-5.9375e-11	-6.5e-11	-4.9375e-11		-4.46875e-11	-4.4375e-11	-3.90625e-11	-3.9375e-11	-4.28125e-11	-4e-11	-3.75e-11	-4.15625e-11	-4.03125e-11	-3.71875e-11	-4.125e-11	-3.46875e-11	-4.09375e-11
-7.28125e-11	-6.65625e-11	-6.875e-11	-6.03125e-11	-5.90625e-11	-6.03125e-11	-6.46875e-11	-6.5e-11	-5.96875e-11	-6.03125e-11	-5.625e-11	-6.53125e-11	-5.5625e-11		-4.28125e-11	-4.375e-11	-4.03125e-11	-3.8125e-11	-4.59375e-11	-4.03125e-11	-4.25e-11	-3.90625e-11	-3.875e-11	-4.125e-11	-3.875e-11	-3.40625e-11	-4.09375e-11
-7.4375e-11	-7e-11	-6.59375e-11	-5.9375e-11	-6.03125e-11	-6.375e-11	-6.0625e-11	-6.03125e-11	-6.03125e-11	-5.5e-11	-5.90625e-11	-6.40625e-11	-5.90625e-11		-4.34375e-11	-4.5e-11	-4.09375e-11	-4.03125e-11	-4.375e-11	-3.5e-11	-3.6875e-11	-4.09375e-11	-3.84375e-11	-4.0625e-11	-4.03125e-11	-3.5e-11	-3.40625e-11
-7.3125e-11	-6.6875e-11	-6.34375e-11	-5.6875e-11	-6.5625e-11	-5.84375e-11	-5.9375e-11	-6.59375e-11	-6.40625e-11	-6.15625e-11	-6.34375e-11	-6.84375e-11	-5.875e-11		-4.125e-11	-4.21875e-11	-4.375e-11	-3.6875e-11	-4.1875e-11	-3.75e-11	-3.53125e-11	-4.15625e-11	-4.6875e-11	-4.28125e-11	-4.125e-11	-3.125e-11	-3.84375e-11
-7.09375e-11	-7.65625e-11	-6.625e-11	-5.46875e-11	-6.0625e-11	-6.03125e-11	-6.40625e-11	-6.25e-11	-6.5e-11	-5.90625e-11	-6.25e-11	-6.59375e-11	-5.5625e-11		-4.46875e-11	-4.40625e-11	-4.375e-11	-3.5e-11	-4.21875e-11	-4.09375e-11	-3.6875e-11	-4.3125e-11	-4.03125e-11	-4.21875e-11	-3.375e-11	-3.625e-11	-3.6875e-11
-7.5e-11	-6.5e-11	-7.28125e-11	-5.8125e-11	-5.65625e-11	-5.4375e-11	-5.59375e-11	-5.21875e-11	-6.0625e-11	-5.84375e-11	-5.4375e-11	-7.03125e-11	-5.21875e-11		-4.03125e-11	-4.53125e-11	-4.03125e-11	-4.15625e-11	-4.5e-11	-3.90625e-11	-4.375e-11	-4.46875e-11	-4.40625e-11	-4.09375e-11	-3.78125e-11	-3.75e-11	-3.84375e-11
-7.84375e-11	-6.6875e-11	-6.8125e-11	-5.78125e-11	-5.3125e-11	-6.28125e-11	-5.90625e-11	-5.65625e-11	-6.6875e-11	-6.15625e-11	-5.125e-11	-5.84375e-11	-5.28125e-11		-4.03125e-11	-3.84375e-11	-3.625e-11	-4.28125e-11	-4.59375e-11	-4.15625e-11	-4.15625e-11	-4.03125e-11	-4.21875e-11	-3.5e-11	-3.59375e-11	-3.3125e-11	-4.03125e-11
-7.28125e-11	-6.78125e-11	-6.96875e-11	-5.5e-11	-6.125e-11	-6.28125e-11	-5.21875e-11	-6.0625e-11	-6.0625e-11	-6.5e-11	-5.375e-11	-6.65625e-11	-5.6875e-11		-4.84375e-11	-4.03125e-11	-3.65625e-11	-4.6875e-11	-4.34375e-11	-4.25e-11	-4.0625e-11	-3.9375e-11	-4.28125e-11	-3.9375e-11	-3.6875e-11	-3.4375e-11	-3.375e-11
-7.53125e-11	-6.5625e-11	-7.15625e-11	-6.5625e-11	-5.09375e-11	-5.96875e-11	-5.90625e-11	-6.78125e-11	-6.9375e-11	-6.5e-11	-5.90625e-11	-6.625e-11	-5.84375e-11		-4.34375e-11	-4.75e-11	-4.4375e-11	-4.625e-11	-4.71875e-11	-3.53125e-11	-4.375e-11	-4.3125e-11	-3.96875e-11	-3.59375e-11	-4.4375e-11	-4.15625e-11	-3.84375e-11
-8.15625e-11	-7.4375e-11	-7.1875e-11	-6.0625e-11	-5.8125e-11	-5.5625e-11	-6.03125e-11	-6.28125e-11	-6.34375e-11	-5.34375e-11	-5.84375e-11	-6.78125e-11	-5.96875e-11		-4.1875e-11	-4.53125e-11	-4.09375e-11	-4.21875e-11	-4.40625e-11	-4.125e-11	-4.6875e-11	-4.28125e-11	-3.84375e-11	-3.3125e-11	-4.25e-11	-4.28125e-11	-3.53125e-11
-8.03125e-11	-6.03125e-11	-7.28125e-11	-6e-11	-5.5e-11	-6.78125e-11	-5.5e-11	-5.9375e-11	-6.25e-11	-6.15625e-11	-6.09375e-11	-7.21875e-11	-5.84375e-11		-4.40625e-11	-4.46875e-11	-4.53125e-11	-3.9375e-11	-4.59375e-11	-4.15625e-11	-4.125e-11	-4.40625e-11	-3.90625e-11	-3.625e-11	-4.09375e-11	-4.125e-11	-3.28125e-11
-7.15625e-11	-7.3125e-11	-7.28125e-11	-5.5e-11	-6.03125e-11	-5.84375e-11	-5.5e-11	-6.5625e-11	-6.4375e-11	-6.03125e-11	-5.9375e-11	-6.09375e-11	-6.03125e-11		-4.53125e-11	-4.5e-11	-4.28125e-11	-4.03125e-11	-4.125e-11	-4.15625e-11	-4.46875e-11	-4.5625e-11	-4.15625e-11	-4.03125e-11	-4.15625e-11	-3.78125e-11	-3.53125e-11
-7.15625e-11	-7.15625e-11	-7.1875e-11	-5.46875e-11	-6.125e-11	-6.3125e-11	-5.75e-11	-5.6875e-11	-6.15625e-11	-6.3125e-11	-6.53125e-11	-6.4375e-11	-5.75e-11		-4.65625e-11	-3.875e-11	-4.4375e-11	-3.8125e-11	-4.09375e-11	-4.09375e-11	-3.9375e-11	-4.125e-11	-3.71875e-11	-3.5625e-11	-3.90625e-11	-3.40625e-11	-3.6875e-11
-7.5e-11	-6.65625e-11	-7.4375e-11	-6.9375e-11	-6.25e-11	-5.78125e-11	-6.5e-11	-6.28125e-11	-6.25e-11	-6.09375e-11	-6.34375e-11	-6.0625e-11	-5.90625e-11		-4.28125e-11	-4.15625e-11	-4.40625e-11	-3.78125e-11	-4.09375e-11	-3.84375e-11	-4.15625e-11	-4.40625e-11	-4.25e-11	-3.9375e-11	-3.78125e-11	-3.875e-11	-3.78125e-11
-7.71875e-11	-7.4375e-11	-6.75e-11	-5.5e-11	-5.8125e-11	-6.09375e-11	-5.84375e-11	-6.46875e-11	-5.84375e-11	-6.1875e-11	-5.5e-11	-5.40625e-11	-5.59375e-11		-3.53125e-11	-4.6875e-11	-3.90625e-11	-3.90625e-11	-3.875e-11	-4.03125e-11	-3.84375e-11	-4.6875e-11	-4.28125e-11	-4.375e-11	-3.65625e-11	-3.59375e-11	-3.84375e-11
-7.96875e-11	-7.21875e-11	-7.5e-11	-6.25e-11	-5.78125e-11	-5.53125e-11	-5.53125e-11	-6.5e-11	-6.65625e-11	-5.84375e-11	-6.03125e-11	-6.65625e-11	-5.53125e-11		-3.875e-11	-4.5625e-11	-3.6875e-11	-4.0625e-11	-3.84375e-11	-4.03125e-11	-3.875e-11	-4.65625e-11	-4.34375e-11	-3.875e-11	-3.65625e-11	-3.75e-11	-3.9375e-11
-8.4375e-11	-6.28125e-11	-7.15625e-11	-5.8125e-11	-6.3125e-11	-6.46875e-11	-6.125e-11	-6.15625e-11	-5.90625e-11	-5.59375e-11	-6.34375e-11	-6.5e-11	-6.21875e-11		-4.71875e-11	-3.8125e-11	-4.03125e-11	-3.65625e-11	-3.875e-11	-3.71875e-11	-3.875e-11	-4.75e-11	-4.15625e-11	-3.84375e-11	-3.78125e-11	-3.96875e-11	-4.1875e-11
-7.46875e-11	-6.46875e-11	-7.0625e-11	-6.40625e-11	-5.4375e-11	-6.09375e-11	-5.875e-11	-6.1875e-11	-5.90625e-11	-6.28125e-11	-5.9375e-11	-6.90625e-11	-5.90625e-11		-4.25e-11	-4.5e-11	-4.28125e-11	-3.90625e-11	-3.96875e-11	-4.03125e-11	-3.9375e-11	-4.375e-11	-3.96875e-11	-3.40625e-11	-3.9375e-11	-4.15625e-11	-3.53125e-11
-8.125e-11	-6.1875e-11	-7.03125e-11	-6.5e-11	-5.875e-11	-5.78125e-11	-6.0625e-11	-6.78125e-11	-5.71875e-11	-5.15625e-11	-6.28125e-11	-6.40625e-11	-5.75e-11		-4.71875e-11	-4.5e-11	-4.34375e-11	-3.71875e-11	-4.5e-11	-3.90625e-11	-4.15625e-11	-4.21875e-11	-4.03125e-11	-3.96875e-11	-3.90625e-11	-3.96875e-11	-3.15625e-11
-7.65625e-11	-6.59375e-11	-6.96875e-11	-6.21875e-11	-5.09375e-11	-5.6875e-11	-5.5e-11	-6.75e-11	-5.9375e-11	-6.125e-11	-5.90625e-11	-6.03125e-11	-5.5625e-11		-4.40625e-11	-4.65625e-11	-4.21875e-11	-4.65625e-11	-4.34375e-11	-4.03125e-11	-4.03125e-11	-4.53125e-11	-3.53125e-11	-4.03125e-11	-3.71875e-11	-3.8125e-11	-3.5e-11
-7.625e-11	-6.09375e-11	-6.25e-11	-6.03125e-11	-5.875e-11	-6.09375e-11	-5.65625e-11	-6.375e-11	-6.90625e-11	-6.59375e-11	-6.40625e-11	-6.21875e-11	-5.40625e-11		-4.03125e-11	-4.84375e-11	-4.34375e-11	-3.84375e-11	-4.6875e-11	-3.84375e-11	-3.71875e-11	-4.34375e-11	-3.875e-11	-3.65625e-11	-3.59375e-11	-3.84375e-11	-3.78125e-11
-7.59375e-11	-6.90625e-11	-6.6875e-11	-5.78125e-11	-5.4375e-11	-6.09375e-11	-5.21875e-11	-5.5e-11	-5.90625e-11	-6.25e-11	-5.46875e-11	-6.15625e-11	-5.53125e-11		-4.0625e-11	-4.8125e-11	-4.28125e-11	-3.625e-11	-4.875e-11	-3.9375e-11	-4.03125e-11	-4.0625e-11	-4.1875e-11	-3.625e-11	-4.0625e-11	-4.03125e-11	-3.65625e-11
-7.8125e-11	-7.0625e-11	-6.8125e-11	-6.0625e-11	-5.40625e-11	-5.90625e-11	-5.5625e-11	-6.375e-11	-6.3125e-11	-6.34375e-11	-6.25e-11	-6.34375e-11	-6.03125e-11		-4.71875e-11	-4.5625e-11	-4.34375e-11	-4.3125e-11	-4.53125e-11	-3.96875e-11	-4.1875e-11	-4.15625e-11	-3.71875e-11	-3.84375e-11	-3.84375e-11	-3.84375e-11	-4.28125e-11
-7.9375e-11	-6.65625e-11	-6.46875e-11	-5.28125e-11	-5.53125e-11	-6.5e-11	-5.875e-11	-5.75e-11	-6.28125e-11	-6.0625e-11	-5.75e-11	-6.5e-11	-5.5e-11		-4.34375e-11	-4.34375e-11	-4.375e-11	-4.3125e-11	-3.6875e-11	-4.0625e-11	-4.53125e-11	-4.3125e-11	-4.28125e-11	-3.71875e-11	-3.65625e-11	-4.03125e-11	-4.34375e-11
-7.34375e-11	-6.8125e-11	-7.125e-11	-5.8125e-11	-5.71875e-11	-6.40625e-11	-6.40625e-11	-6.03125e-11	-6.1875e-11	-5.96875e-11	-6.34375e-11	-6.34375e-11	-5.875e-11		-4.40625e-11	-3.65625e-11	-4.40625e-11	-4.0625e-11	-4.53125e-11	-4.625e-11	-4.28125e-11	-4.40625e-11	-4.3125e-11	-4.125e-11	-3.875e-11	-4.03125e-11	-4.1875e-11
-7.875e-11	-7.1875e-11	-6.84375e-11	-5.8125e-11	-5.40625e-11	-6.375e-11	-5.875e-11	-6.15625e-11	-5.9375e-11	-5.5e-11	-5.78125e-11	-6.25e-11	-5.4375e-11		-4.90625e-11	-3.6875e-11	-4.1875e-11	-4.125e-11	-4.21875e-11	-4.5e-11	-4.5e-11	-4.125e-11	-3.875e-11	-4.03125e-11	-3.875e-11	-3.40625e-11	-3.84375e-11
-7.40625e-11	-6.8125e-11	-7.03125e-11	-5.09375e-11	-5.21875e-11	-6.125e-11	-4.84375e-11	-6.5e-11	-6.84375e-11	-5.5625e-11	-5.71875e-11	-6.75e-11	-5.1875e-11		-4.03125e-11	-4.15625e-11	-4.28125e-11	-4.15625e-11	-4.5625e-11	-3.84375e-11	-4.34375e-11	-3.90625e-11	-3.90625e-11	-4.28125e-11	-3.78125e-11	-3.40625e-11	-4.03125e-11
-7.6875e-11	-6.90625e-11	-7e-11	-6.3125e-11	-5.90625e-11	-6e-11	-5.75e-11	-5.78125e-11	-6.34375e-11	-6.46875e-11	-5.96875e-11	-6.5625e-11	-5.53125e-11		-3.40625e-11	-4.0625e-11	-3.59375e-11	-4.28125e-11	-4.1875e-11	-3.59375e-11	-4.1875e-11	-3.625e-11	-3.9375e-11	-4.09375e-11	-3.53125e-11	-3.75e-11	-3.875e-11
-7.375e-11	-6.6875e-11	-7.3125e-11	-6.34375e-11	-5.03125e-11	-5.90625e-11	-5.84375e-11	-5.71875e-11	-6.59375e-11	-5.65625e-11	-6.75e-11	-6.96875e-11	-5.75e-11		-3.71875e-11	-4.21875e-11	-4.03125e-11	-4.1875e-11	-3.84375e-11	-4.03125e-11	-3.6875e-11	-3.5625e-11	-3.5625e-11	-3.8125e-11	-3.8125e-11	-3.875e-11	-3.3125e-11
-7.53125e-11	-7.3125e-11	-6.78125e-11	-5.375e-11	-5.125e-11	-5.9375e-11	-5.65625e-11	-5.90625e-11	-6.40625e-11	-5.6875e-11	-5.15625e-11	-6.375e-11	-5.1875e-11		-4.09375e-11	-4.25e-11	-4.03125e-11	-3.71875e-11	-3.71875e-11	-4.09375e-11	-4.21875e-11	-4.375e-11	-3.8125e-11	-3.625e-11	-4.15625e-11	-3.8125e-11	-4.03125e-11
-7.34375e-11	-6.625e-11	-6.90625e-11	-5.78125e-11	-5.375e-11	-5.90625e-11	-5.78125e-11	-6.78125e-11	-6.4375e-11	-6.03125e-11	-6.0625e-11	-6.78125e-11	-5.53125e-11		-4.4375e-11	-4.3125e-11	-4.1875e-11	-4.09375e-11	-4.0625e-11	-4.28125e-11	-4.28125e-11	-4.53125e-11	-4.15625e-11	-3.8125e-11	-3.875e-11	-3.65625e-11	-4.375e-11
-7.28125e-11	-6.65625e-11	-6.65625e-11	-5.4375e-11	-5.4375e-11	-6.03125e-11	-6.125e-11	-6.6875e-11	-6.34375e-11	-5.84375e-11	-5.84375e-11	-6.5e-11	-5.9375e-11		-4.34375e-11	-4.40625e-11	-3.71875e-11	-4.625e-11	-4.34375e-11	-4.1875e-11	-3.90625e-11	-3.65625e-11	-3.90625e-11	-4.03125e-11	-4.03125e-11	-3.59375e-11	-3.875e-11
-7.3125e-11	-6.5625e-11	-6.71875e-11	-6.03125e-11	-4.96875e-11	-5.59375e-11	-5.625e-11	-6.46875e-11	-6.1875e-11	-4.96875e-11	-6e-11	-6.46875e-11	-5.84375e-11		-4.78125e-11	-4.71875e-11	-4.0625e-11	-4.21875e-11	-4.53125e-11	-4.1875e-11	-4.03125e-11	-4.03125e-11	-3.78125e-11	-3.90625e-11	-3.53125e-11	-3.1875e-11	-3.90625e-11
-7.15625e-11	-6.53125e-11	-6.84375e-11	-6.34375e-11	-5.78125e-11	-6.03125e-11	-6.21875e-11	-6.65625e-11	-6.03125e-11	-6.46875e-11	-6.09375e-11	-6.28125e-11	-6.15625e-11		-4.40625e-11	-4.40625e-11	-4.53125e-11	-4.3125e-11	-4.34375e-11	-3.40625e-11	-3.875e-11	-4.1875e-11	-3.9375e-11	-4.03125e-11	-4.03125e-11	-3.1875e-11	-4.03125e-11
-6.8125e-11	-6.78125e-11	-6.625e-11	-6.03125e-11	-5.3125e-11	-6.5e-11	-5.71875e-11	-6.75e-11	-5.90625e-11	-5.28125e-11	-5.34375e-11	-6.15625e-11	-5.4375e-11		-4.6875e-11	-4.5e-11	-3.96875e-11	-4.28125e-11	-3.9375e-11	-4.03125e-11	-4.28125e-11	-4.125e-11	-3.6875e-11	-3.8125e-11	-4.09375e-11	-3.5625e-11	-3.5e-11
-7.03125e-11	-6.90625e-11	-6.5625e-11	-5.59375e-11	-6.53125e-11	-6.28125e-11	-5.40625e-11	-6.46875e-11	-5.8125e-11	-6.25e-11	-6.84375e-11	-6.59375e-11	-5.875e-11		-4.5e-11	-4.625e-11	-4.5625e-11	-3.8125e-11	-3.8125e-11	-4.125e-11	-5e-11	-4.21875e-11	-3.8125e-11	-4.15625e-11	-3.90625e-11	-3.5625e-11	-3.625e-11
-7.40625e-11	-6.9375e-11	-7.4375e-11	-6.03125e-11	-5.25e-11	-6.625e-11	-5.5e-11	-6.5625e-11	-6.65625e-11	-6.03125e-11	-6.8125e-11	-5.90625e-11	-6.0625e-11		-4.1875e-11	-4.5e-11	-4.875e-11	-3.8125e-11	-4.03125e-11	-4.15625e-11	-4.4375e-11	-4.375e-11	-4.09375e-11	-3.65625e-11	-3.75e-11	-3.65625e-11	-4.28125e-11
-7.65625e-11	-6.21875e-11	-6.59375e-11	-6.21875e-11	-6.34375e-11	-6.34375e-11	-5.375e-11	-6.0625e-11	-6.5e-11	-5.78125e-11	-5.5e-11	-6.3125e-11	-5.59375e-11		-4.09375e-11	-4.53125e-11	-4.75e-11	-3.78125e-11	-4.40625e-11	-4.15625e-11	-3.8125e-11	-4.21875e-11	-4.03125e-11	-3.53125e-11	-4.03125e-11	-3.5e-11	-3.78125e-11
-7.65625e-11	-6.90625e-11	-6.625e-11	-5.65625e-11	-5.65625e-11	-6.5e-11	-5.875e-11	-7.15625e-11	-6.0625e-11	-5.59375e-11	-6.25e-11	-6.5e-11	-5.96875e-11		-3.90625e-11	-3.65625e-11	-4.375e-11	-3.5e-11	-4.25e-11	-4.40625e-11	-4.5e-11	-4.3125e-11	-4.15625e-11	-3.8125e-11	-3.84375e-11	-3.8125e-11	-3.65625e-11
-7.03125e-11	-6.625e-11	-6.71875e-11	-5.5e-11	-5.71875e-11	-6e-11	-5.75e-11	-6.5625e-11	-6.9375e-11	-5.46875e-11	-5.90625e-11	-6.84375e-11	-5.3125e-11		-4.0625e-11	-4.40625e-11	-4.65625e-11	-4.28125e-11	-4.59375e-11	-3.96875e-11	-4.46875e-11	-4.53125e-11	-3.84375e-11	-4.15625e-11	-4.03125e-11	-3.90625e-11	-3.625e-11
-7.40625e-11	-6.71875e-11	-7.1875e-11	-6.15625e-11	-5.5625e-11	-6.21875e-11	-5.40625e-11	-5.84375e-11	-5.625e-11	-5.4375e-11	-6.71875e-11	-6.5e-11	-5.875e-11		-4.15625e-11	-4.59375e-11	-4.46875e-11	-3.78125e-11	-4.59375e-11	-4e-11	-3.78125e-11	-4.59375e-11	-3.8125e-11	-3.75e-11	-4.15625e-11	-4.0625e-11	-3.1875e-11
-7.21875e-11	-7.375e-11	-6.71875e-11	-5.90625e-11	-5.625e-11	-6.5e-11	-5.15625e-11	-5.875e-11	-6.59375e-11	-6.21875e-11	-6.21875e-11	-6.6875e-11	-5.75e-11		-4.15625e-11	-4.15625e-11	-4.5e-11	-3.78125e-11	-4.4375e-11	-4.28125e-11	-3.65625e-11	-4.4375e-11	-3.9375e-11	-3.75e-11	-4.03125e-11	-3.59375e-11	-3.8125e-11
-7.65625e-11	-6.84375e-11	-6.21875e-11	-5.71875e-11	-5.59375e-11	-6.125e-11	-5.15625e-11	-6.3125e-11	-6.03125e-11	-5.59375e-11	-5.78125e-11	-5.8125e-11	-5.625e-11		-3.78125e-11	-4.84375e-11	-4.0625e-11	-4.15625e-11	-4.28125e-11	-4.53125e-11	-4.0625e-11	-4.0625e-11	-4.03125e-11	-3.75e-11	-4.21875e-11	-4.03125e-11	-4.28125e-11
-7.03125e-11	-7.3125e-11	-6.59375e-11	-5.9375e-11	-5.25e-11	-6.4375e-11	-5.40625e-11	-6.1875e-11	-6.8125e-11	-6.09375e-11	-6.21875e-11	-5.9375e-11	-6.28125e-11		-3.53125e-11	-4.4375e-11	-3.78125e-11	-5.09375e-11	-4.3125e-11	-4.0625e-11	-4.28125e-11	-4.03125e-11	-3.9375e-11	-3.5625e-11	-4.15625e-11	-3.6875e-11	-4.34375e-11
-7.09375e-11	-6.9375e-11	-7.40625e-11	-6.46875e-11	-5.9375e-11	-6.15625e-11	-5.25e-11	-5.9375e-11	-6.65625e-11	-5.28125e-11	-6.375e-11	-6.40625e-11	-6.03125e-11		-4.15625e-11	-4.15625e-11	-4.53125e-11	-4.3125e-11	-4.40625e-11	-4.0625e-11	-4.75e-11	-3.90625e-11	-4.03125e-11	-4.28125e-11	-3.5625e-11	-3.53125e-11	-3.9375e-11
-7.0625e-11	-6.9375e-11	-5.78125e-11	-5.59375e-11	-5.625e-11	-6.09375e-11	-5.46875e-11	-5.65625e-11	-6.0625e-11	-6.09375e-11	-6.90625e-11	-7.1875e-11	-5.96875e-11		-4.21875e-11	-4.4375e-11	-4.40625e-11	-3.65625e-11	-4.65625e-11	-4.03125e-11	-4.71875e-11	-4.03125e-11	-4.03125e-11	-3.78125e-11	-3.53125e-11	-3.40625e-11	-3.90625e-11
-7.0625e-11	-6.65625e-11	-6.4375e-11	-5.21875e-11	-5.78125e-11	-6.59375e-11	-5.125e-11	-6.4375e-11	-6.78125e-11	-5.96875e-11	-6.09375e-11	-6.40625e-11	-5.25e-11		-4.09375e-11	-4.21875e-11	-4.34375e-11	-4.59375e-11	-4.28125e-11	-4.15625e-11	-4.0625e-11	-4.4375e-11	-4.28125e-11	-3.5625e-11	-3.15625e-11	-3.625e-11	-4.09375e-11
-7.09375e-11	-5.8125e-11	-6.71875e-11	-6.03125e-11	-5.34375e-11	-6.53125e-11	-5.21875e-11	-6.46875e-11	-6.21875e-11	-5.65625e-11	-5.46875e-11	-5.96875e-11	-5.875e-11		-4.9375e-11	-4.03125e-11	-4.53125e-11	-4.625e-11	-3.90625e-11	-3.78125e-11	-3.875e-11	-4.53125e-11	-4.28125e-11	-4.21875e-11	-3.46875e-11	-3.0625e-11	-3.78125e-11
-7.21875e-11	-6.9375e-11	-7.03125e-11	-6.65625e-11	-5.78125e-11	-6.21875e-11	-5.59375e-11	-6.625e-11	-5.3125e-11	-5.9375e-11	-5.46875e-11	-5.9375e-11	-6.09375e-11		-4.84375e-11	-4.125e-11	-4.9375e-11	-3.75e-11	-4.3125e-11	-3.90625e-11	-4.25e-11	-4.28125e-11	-4.15625e-11	-4.03125e-11	-3.375e-11	-3.28125e-11	-3.875e-11
-7.5e-11	-6.8125e-11	-7.53125e-11	-6.0625e-11	-5.03125e-11	-6.5e-11	-5.125e-11	-6.125e-11	-6.3125e-11	-5.78125e-11	-6.21875e-11	-6.59375e-11	-5.9375e-11		-4.25e-11	-4.15625e-11	-4.0625e-11	-4.03125e-11	-4.15625e-11	-4.15625e-11	-3.6875e-11	-3.28125e-11	-3.78125e-11	-3.5e-11	-3.34375e-11	-3.5625e-11	-4.03125e-11
-7.09375e-11	-6.5e-11	-6.9375e-11	-5.84375e-11	-5.5625e-11	-6.5625e-11	-6.25e-11	-6.65625e-11	-5.875e-11	-6.125e-11	-5.46875e-11	-6.15625e-11	-5.96875e-11		-4.28125e-11	-4.34375e-11	-4.3125e-11	-4.15625e-11	-4.1875e-11	-4.1875e-11	-3.59375e-11	-3.9375e-11	-3.78125e-11	-3.90625e-11	-3.34375e-11	-3.625e-11	-3.46875e-11
-6.9375e-11	-7.03125e-11	-6.9375e-11	-5.1875e-11	-5.28125e-11	-5.40625e-11	-5.71875e-11	-6.28125e-11	-5.875e-11	-4.96875e-11	-6.28125e-11	-5.9375e-11	-6.15625e-11		-4.09375e-11	-4.4375e-11	-4.34375e-11	-4.15625e-11	-4.15625e-11	-4.46875e-11	-3.875e-11	-4.46875e-11	-3.6875e-11	-4.375e-11	-3.40625e-11	-3.28125e-11	-3.84375e-11
-7.40625e-11	-6.21875e-11	-7e-11	-6.40625e-11	-5.5e-11	-7e-11	-5.8125e-11	-6.03125e-11	-5.9375e-11	-5.34375e-11	-5.875e-11	-6.1875e-11	-5.65625e-11		-4.0625e-11	-4.5e-11	-4.375e-11	-3.90625e-11	-4.1875e-11	-4.9375e-11	-4.09375e-11	-4.0625e-11	-3.9375e-11	-3.625e-11	-3.8125e-11	-3.6875e-11	-3.9375e-11
-7.03125e-11	-6.5e-11	-6.5625e-11	-6.15625e-11	-6.21875e-11	-5.9375e-11	-5.4375e-11	-6.65625e-11	-5.90625e-11	-4.90625e-11	-5.59375e-11	-6.71875e-11	-5.59375e-11		-4.0625e-11	-4.125e-11	-4.28125e-11	-4.09375e-11	-4.4375e-11	-5e-11	-3.875e-11	-4.0625e-11	-4.28125e-11	-3.8125e-11	-3.65625e-11	-3.78125e-11	-3.53125e-11
-7.4375e-11	-7.21875e-11	-6.90625e-11	-6.25e-11	-5.90625e-11	-6.5e-11	-5.625e-11	-6.1875e-11	-6.40625e-11	-5.65625e-11	-6.4375e-11	-6.53125e-11	-6.25e-11		-4.15625e-11	-4.5e-11	-4.46875e-11	-4.125e-11	-4.375e-11	-4.1875e-11	-4.15625e-11	-4.5e-11	-4.34375e-11	-4.1875e-11	-3.71875e-11	-3.9375e-11	-4.03125e-11
-8.40625e-11	-7.125e-11	-6.6875e-11	-6.03125e-11	-5.96875e-11	-5.71875e-11	-5.84375e-11	-6.84375e-11	-5.6875e-11	-5.6875e-11	-6.5625e-11	-6.21875e-11	-5.96875e-11		-4.5625e-11	-4.40625e-11	-4.4375e-11	-3.96875e-11	-4.84375e-11	-4.03125e-11	-3.9375e-11	-4.09375e-11	-3.71875e-11	-4.09375e-11	-3.96875e-11	-4.4375e-11	-3.46875e-11
-7.78125e-11	-6.9375e-11	-7.46875e-11	-6.21875e-11	-5.21875e-11	-6.5625e-11	-5.9375e-11	-5.78125e-11	-6.25e-11	-5.90625e-11	-6.34375e-11	-6.5625e-11	-6.03125e-11		-3.875e-11	-4.21875e-11	-4.28125e-11	-4.15625e-11	-4.90625e-11	-4.125e-11	-4.28125e-11	-4.40625e-11	-3.59375e-11	-3.6875e-11	-3.84375e-11	-3.59375e-11	-3.90625e-11
-7.9375e-11	-6.375e-11	-6.03125e-11	-5.90625e-11	-6.03125e-11	-6.8125e-11	-6.21875e-11	-6.25e-11	-5.71875e-11	-6.09375e-11	-5.78125e-11	-6.5625e-11	-5.8125e-11		-4.5e-11	-4.21875e-11	-4.28125e-11	-4.8125e-11	-4.46875e-11	-4.1875e-11	-3.8125e-11	-3.84375e-11	-3.65625e-11	-3.875e-11	-3.6875e-11	-3.9375e-11	-4.09375e-11
-7.96875e-11	-6.90625e-11	-6.4375e-11	-6.375e-11	-6.34375e-11	-6.71875e-11	-5.84375e-11	-6.46875e-11	-6.5625e-11	-4.90625e-11	-6.15625e-11	-6.5e-11	-5.96875e-11		-4.40625e-11	-4.53125e-11	-4.3125e-11	-4.3125e-11	-4.40625e-11	-3.53125e-11	-3.59375e-11	-3.65625e-11	-3.90625e-11	-4.125e-11	-4.34375e-11	-3.5e-11	-3.59375e-11
-8.03125e-11	-6.46875e-11	-6.90625e-11	-6.28125e-11	-6.28125e-11	-6.3125e-11	-5.25e-11	-5.5e-11	-6.40625e-11	-5.59375e-11	-5.90625e-11	-6.375e-11	-6.3125e-11		-4.625e-11	-4.375e-11	-4.40625e-11	-4.40625e-11	-4.40625e-11	-3.90625e-11	-3.5e-11	-4.09375e-11	-4.125e-11	-3.875e-11	-4.46875e-11	-3.65625e-11	-4.09375e-11
-7.5625e-11	-6.625e-11	-6.53125e-11	-6.125e-11	-5.78125e-11	-6.375e-11	-5.34375e-11	-6.40625e-11	-6.34375e-11	-5.125e-11	-5.75e-11	-6.125e-11	-6.0625e-11		-4.59375e-11	-4.09375e-11	-4.53125e-11	-4.34375e-11	-4.25e-11	-4.65625e-11	-3.90625e-11	-4.46875e-11	-4.0625e-11	-4.09375e-11	-4.03125e-11	-3.65625e-11	-4.46875e-11
-7.65625e-11	-6.40625e-11	-6.71875e-11	-6.28125e-11	-5.625e-11	-6.84375e-11	-6.09375e-11	-5.96875e-11	-6.34375e-11	-5.8125e-11	-6.65625e-11	-6.34375e-11	-5.71875e-11		-3.90625e-11	-3.9375e-11	-4.03125e-11	-4.53125e-11	-4.15625e-11	-3.78125e-11	-4.15625e-11	-4.4375e-11	-4.15625e-11	-3.65625e-11	-3.59375e-11	-3.71875e-11	-4.34375e-11
-7.875e-11	-6.5625e-11	-6.8125e-11	-5.96875e-11	-5.4375e-11	-6.59375e-11	-4.9375e-11	-5.78125e-11	-5.59375e-11	-5.28125e-11	-5.75e-11	-6.09375e-11	-6.21875e-11		-3.78125e-11	-4.34375e-11	-4.4375e-11	-3.90625e-11	-3.90625e-11	-3.84375e-11	-3.65625e-11	-4.15625e-11	-3.84375e-11	-3.84375e-11	-3.15625e-11	-3.46875e-11	-3.78125e-11
-7.125e-11	-6.875e-11	-7.15625e-11	-6.5e-11	-5.5e-11	-5.96875e-11	-5e-11	-6.375e-11	-5.84375e-11	-5.0625e-11	-5.9375e-11	-6.375e-11	-5.375e-11		-3.875e-11	-4.6875e-11	-4.46875e-11	-3.875e-11	-4.0625e-11	-4.53125e-11	-4.0625e-11	-4.15625e-11	-4.28125e-11	-3.6875e-11	-3.5e-11	-3.84375e-11	-3.84375e-11
-7.65625e-11	-6.4375e-11	-6.71875e-11	-5.625e-11	-5.875e-11	-6.15625e-11	-5.78125e-11	-6.34375e-11	-6.3125e-11	-5.53125e-11	-5.5625e-11	-6.3125e-11	-5.71875e-11		-3.78125e-11	-4.15625e-11	-4.40625e-11	-4.1875e-11	-4.59375e-11	-4.375e-11	-4.59375e-11	-4.03125e-11	-4.28125e-11	-3.15625e-11	-3.53125e-11	-3.71875e-11	-3.78125e-11
-7e-11	-6.375e-11	-6.71875e-11	-6.28125e-11	-6.21875e-11	-5.9375e-11	-5.84375e-11	-6.1875e-11	-6.3125e-11	-6.15625e-11	-6.15625e-11	-6.71875e-11	-5.625e-11		-4.4375e-11	-3.78125e-11	-4.1875e-11	-4.4375e-11	-4.375e-11	-4.15625e-11	-4.8125e-11	-4.09375e-11	-3.96875e-11	-3.6875e-11	-3.5e-11	-3.65625e-11	-4.03125e-11
-7.90625e-11	-7e-11	-7.28125e-11	-6.65625e-11	-5.5e-11	-6.34375e-11	-5.40625e-11	-6.03125e-11	-6.53125e-11	-5.65625e-11	-5.875e-11	-5.9375e-11	-6.3125e-11		-4.65625e-11	-4.8125e-11	-4.4375e-11	-4.15625e-11	-4.09375e-11	-4.40625e-11	-4.375e-11	-4.3125e-11	-3.8125e-11	-4.03125e-11	-3.6875e-11	-3.875e-11	-3.5e-11
-7.71875e-11	-6.875e-11	-7.40625e-11	-6.25e-11	-6.15625e-11	-7.0625e-11	-5.46875e-11	-6.5e-11	-5.78125e-11	-5.375e-11	-6.375e-11	-6.40625e-11	-6.0625e-11		-4.40625e-11	-4.0625e-11	-5e-11	-3.78125e-11	-3.90625e-11	-4.3125e-11	-4.125e-11	-4.40625e-11	-4.28125e-11	-3.53125e-11	-3.84375e-11	-4.03125e-11	-3.5625e-11
-7.21875e-11	-7e-11	-7.1875e-11	-6.15625e-11	-6.09375e-11	-6.75e-11	-5.90625e-11	-6.46875e-11	-6.59375e-11	-5.5e-11	-6.0625e-11	-6.6875e-11	-6.59375e-11		-4.59375e-11	-3.90625e-11	-4.65625e-11	-3.9375e-11	-4.15625e-11	-4.28125e-11	-4.03125e-11	-3.78125e-11	-4.03125e-11	-3.9375e-11	-3.59375e-11	-3.75e-11	-3.9375e-11
-7.6875e-11	-7e-11	-6.875e-11	-5.6875e-11	-6.125e-11	-6.625e-11	-6.21875e-11	-6.03125e-11	-6.34375e-11	-5.21875e-11	-6.59375e-11	-6.65625e-11	-6.3125e-11		-4.21875e-11	-4.53125e-11	-4.5e-11	-4.28125e-11	-4.375e-11	-3.96875e-11	-4.8125e-11	-3.78125e-11	-4.21875e-11	-3.6875e-11	-3.40625e-11	-3.6875e-11	-4.21875e-11
-6.5e-11	-6.53125e-11	-7.0625e-11	-5.8125e-11	-5.84375e-11	-6.53125e-11	-5.625e-11	-6.34375e-11	-6.28125e-11	-5.15625e-11	-5.5625e-11	-6.21875e-11	-5.65625e-11		-4.21875e-11	-4.03125e-11	-4.375e-11	-4.46875e-11	-4.28125e-11	-3.5625e-11	-4.6875e-11	-4.09375e-11	-4.375e-11	-4.03125e-11	-3.59375e-11	-3.78125e-11	-3.90625e-11
-7.65625e-11	-6.71875e-11	-6.40625e-11	-5.90625e-11	-6.09375e-11	-5.5625e-11	-5.34375e-11	-5.875e-11	-6.125e-11	-5.53125e-11	-6e-11	-6.25e-11	-6.1875e-11		-4.1875e-11	-4.0625e-11	-4.03125e-11	-4.46875e-11	-4.6875e-11	-3.65625e-11	-4.40625e-11	-4.3125e-11	-3.6875e-11	-3.59375e-11	-3.8125e-11	-3.6875e-11	-3.78125e-11
-7.53125e-11	-7.21875e-11	-6.21875e-11	-6.03125e-11	-5.5e-11	-5.25e-11	-5.03125e-11	-6.5625e-11	-6.6875e-11	-5.78125e-11	-5.6875e-11	-6.90625e-11	-5.625e-11		-3.90625e-11	-4.28125e-11	-3.6875e-11	-4.46875e-11	-5e-11	-4.625e-11	-4.46875e-11	-4.75e-11	-4.09375e-11	-3.875e-11	-3.75e-11	-3.5e-11	-3.65625e-11
-7.6875e-11	-6.84375e-11	-6.8125e-11	-5.96875e-11	-5.3125e-11	-5.875e-11	-5.53125e-11	-5.34375e-11	-6.09375e-11	-5.4375e-11	-6.5e-11	-6.78125e-11	-5.15625e-11		-3.59375e-11	-4.03125e-11	-4.34375e-11	-3.9375e-11	-4.375e-11	-4.96875e-11	-4.375e-11	-4.28125e-11	-3.875e-11	-3.53125e-11	-3.6875e-11	-3.71875e-11	-3.28125e-11
-6.875e-11	-7.0625e-11	-7e-11	-6.53125e-11	-6e-11	-6.5e-11	-5.59375e-11	-6.25e-11	-7.09375e-11	-5.0625e-11	-6.15625e-11	-6.59375e-11	-6.28125e-11		-4.3125e-11	-3.90625e-11	-4.84375e-11	-4.0625e-11	-4.09375e-11	-4e-11	-4.09375e-11	-3.9375e-11	-4.25e-11	-3.65625e-11	-3.6875e-11	-3.9375e-11	-3.90625e-11
-7.6875e-11	-7.15625e-11	-6.90625e-11	-6.625e-11	-6.03125e-11	-6.1875e-11	-5.21875e-11	-6.375e-11	-6.125e-11	-5.59375e-11	-5.59375e-11	-6.78125e-11	-4.96875e-11		-4.3125e-11	-4.03125e-11	-4.5e-11	-4.1875e-11	-4.03125e-11	-4.09375e-11	-3.90625e-11	-3.71875e-11	-3.9375e-11	-3.96875e-11	-3.40625e-11	-4.03125e-11	-3.8125e-11
-7.65625e-11	-7.3125e-11	-6.84375e-11	-6.34375e-11	-5.21875e-11	-6.78125e-11	-5.28125e-11	-6.28125e-11	-6.46875e-11	-5.4375e-11	-6.46875e-11	-6.46875e-11	-6e-11		-4.4375e-11	-4.34375e-11	-4.34375e-11	-4.21875e-11	-4.15625e-11	-4.125e-11	-3.78125e-11	-3.75e-11	-4.21875e-11	-3.59375e-11	-3.65625e-11	-4.15625e-11	-3.53125e-11
-7.59375e-11	-7.15625e-11	-6.5625e-11	-6.46875e-11	-5.90625e-11	-5.5e-11	-5.65625e-11	-6.03125e-11	-6.15625e-11	-5.34375e-11	-6.15625e-11	-5.78125e-11	-5.90625e-11		-4.5e-11	-4.25e-11	-4.375e-11	-4.15625e-11	-4.4375e-11	-4.3125e-11	-4.15625e-11	-3.5e-11	-4.46875e-11	-3.25e-11	-3.96875e-11	-4.15625e-11	-3.65625e-11
-7.15625e-11	-7.03125e-11	-7.3125e-11	-6.1875e-11	-5.96875e-11	-6.4375e-11	-5.125e-11	-6.03125e-11	-5.9375e-11	-5.34375e-11	-5.59375e-11	-6.5e-11	-5.59375e-11		-4.84375e-11	-4.40625e-11	-3.9375e-11	-4.15625e-11	-4.3125e-11	-3.84375e-11	-3.75e-11	-3.9375e-11	-4.28125e-11	-3.46875e-11	-3.8125e-11	-3.59375e-11	-4.03125e-11
-7.75e-11	-6.59375e-11	-6.59375e-11	-5.65625e-11	-5.71875e-11	-5.96875e-11	-5.5e-11	-5.625e-11	-6.21875e-11	-5.5625e-11	-5.5625e-11	-6.53125e-11	-6.3125e-11		-4.625e-11	-4.46875e-11	-4.3125e-11	-3.90625e-11	-4.28125e-11	-3.6875e-11	-4.4375e-11	-4.375e-11	-4.46875e-11	-3.59375e-11	-4.1875e-11	-3.53125e-11	-3.71875e-11
-8.125e-11	-7.46875e-11	-6.34375e-11	-6.40625e-11	-5.78125e-11	-6.53125e-11	-5.3125e-11	-6.03125e-11	-6.71875e-11	-5.34375e-11	-5.75e-11	-5.9375e-11	-5.28125e-11		-4.0625e-11	-4.78125e-11	-3.9375e-11	-4.125e-11	-4.03125e-11	-4.28125e-11	-4.78125e-11	-4.1875e-11	-4.53125e-11	-3.75e-11	-4.15625e-11	-4.25e-11	-3.78125e-11
-7.65625e-11	-7.3125e-11	-6.5e-11	-6.5e-11	-5.28125e-11	-5.875e-11	-5.625e-11	-6.71875e-11	-6.6875e-11	-5.84375e-11	-6.0625e-11	-6.53125e-11	-5.5e-11		-4.5e-11	-4.53125e-11	-4.15625e-11	-4.09375e-11	-4.34375e-11	-4.0625e-11	-4.5e-11	-3.6875e-11	-4.09375e-11	-3.65625e-11	-4.34375e-11	-3.75e-11	-4.03125e-11
-7.46875e-11	-6.5625e-11	-6.28125e-11	-5.59375e-11	-5.65625e-11	-6.34375e-11	-5.03125e-11	-6.03125e-11	-7.34375e-11	-5.6875e-11	-6.21875e-11	-5.65625e-11	-6e-11		-4.53125e-11	-4.5e-11	-4.125e-11	-4.34375e-11	-4.40625e-11	-4.375e-11	-4.15625e-11	-4.34375e-11	-4.28125e-11	-3.28125e-11	-4.1875e-11	-3.46875e-11	-4.125e-11
-7.46875e-11	-7.0625e-11	-6.84375e-11	-6.78125e-11	-6e-11	-5.84375e-11	-5.53125e-11	-5.9375e-11	-6.4375e-11	-4.9375e-11	-5.8125e-11	-6.0625e-11	-6.375e-11		-4.1875e-11	-4.53125e-11	-4.15625e-11	-4.09375e-11	-3.96875e-11	-4.15625e-11	-4.28125e-11	-4.5e-11	-4.28125e-11	-3.78125e-11	-3.84375e-11	-3.59375e-11	-3.84375e-11
-7.9375e-11	-7.65625e-11	-6.59375e-11	-6.125e-11	-6.3125e-11	-5.84375e-11	-5.3125e-11	-6.5e-11	-6.40625e-11	-5.53125e-11	-5.96875e-11	-6.3125e-11	-5.71875e-11		-3.78125e-11	-4.46875e-11	-4.5e-11	-3.84375e-11	-4.25e-11	-4.21875e-11	-4.53125e-11	-4.46875e-11	-4.125e-11	-4.09375e-11	-4.28125e-11	-3.34375e-11	-3.59375e-11
-7.5625e-11	-6.59375e-11	-6.96875e-11	-6.15625e-11	-5.5e-11	-6.5625e-11	-5.03125e-11	-6.53125e-11	-6.78125e-11	-5.8125e-11	-6.21875e-11	-7.28125e-11	-6.4375e-11		-3.96875e-11	-4.71875e-11	-4.125e-11	-4.15625e-11	-4.125e-11	-4.40625e-11	-4.03125e-11	-4.0625e-11	-4.3125e-11	-4.0625e-11	-3.875e-11	-3.75e-11	-4.1875e-11
-7.34375e-11	-7.3125e-11	-6.5e-11	-6.53125e-11	-5.40625e-11	-6.40625e-11	-5.8125e-11	-6.21875e-11	-6.46875e-11	-5.15625e-11	-6.28125e-11	-6e-11	-5.59375e-11		-4.34375e-11	-4.84375e-11	-4.375e-11	-4.15625e-11	-4.03125e-11	-4.03125e-11	-3.8125e-11	-4.46875e-11	-3.84375e-11	-4.21875e-11	-3.21875e-11	-3.9375e-11	-3.8125e-11
-7.28125e-11	-6.9375e-11	-6.34375e-11	-5.84375e-11	-5.84375e-11	-5.625e-11	-5.625e-11	-5.8125e-11	-5.8125e-11	-5.84375e-11	-5.9375e-11	-5.75e-11	-5.71875e-11		-5.28125e-11	-4.15625e-11	-4.46875e-11	-3.8125e-11	-4.03125e-11	-3.8125e-11	-4.375e-11	-4.65625e-11	-4.15625e-11	-4.03125e-11	-3.84375e-11	-4.03125e-11	-4.09375e-11
-7.5e-11	-6.9375e-11	-6.375e-11	-6.21875e-11	-5.65625e-11	-6.6875e-11	-6.15625e-11	-6.5625e-11	-6.46875e-11	-6.03125e-11	-5.84375e-11	-6.1875e-11	-5.78125e-11		-5e-11	-4.0625e-11	-4.4375e-11	-4.125e-11	-4.21875e-11	-4.375e-11	-3.78125e-11	-4.1875e-11	-3.875e-11	-4.4375e-11	-4.0625e-11	-4.28125e-11	-3.71875e-11
-7.71875e-11	-6.59375e-11	-6.25e-11	-6.21875e-11	-5.65625e-11	-6.28125e-11	-6e-11	-6.3125e-11	-6.4375e-11	-5.65625e-11	-5.625e-11	-6.03125e-11	-5.1875e-11		-4.0625e-11	-4.4375e-11	-4.53125e-11	-4.1875e-11	-4.28125e-11	-4.125e-11	-4.03125e-11	-4.03125e-11	-3.5e-11	-3.78125e-11	-3.90625e-11	-4.09375e-11	-3.34375e-11
-7.6875e-11	-6.96875e-11	-6.71875e-11	-5.9375e-11	-6.5e-11	-6e-11	-6e-11	-6.46875e-11	-6.46875e-11	-5.4375e-11	-5.8125e-11	-6.84375e-11	-5.28125e-11		-4.53125e-11	-4.03125e-11	-3.9375e-11	-4.03125e-11	-4.625e-11	-4.03125e-11	-3.5625e-11	-4.15625e-11	-3.90625e-11	-3.4375e-11	-3.8125e-11	-3.78125e-11	-3.84375e-11
-7.15625e-11	-6.65625e-11	-6.9375e-11	-6.21875e-11	-5e-11	-6.25e-11	-5.9375e-11	-6.125e-11	-6.46875e-11	-6e-11	-5.84375e-11	-7e-11	-6.03125e-11		-4.21875e-11	-4.28125e-11	-4.59375e-11	-3.84375e-11	-4.46875e-11	-3.71875e-11	-4.09375e-11	-4.46875e-11	-3.78125e-11	-3.59375e-11	-3.28125e-11	-3.34375e-11	-4.4375e-11
-7.8125e-11	-7.15625e-11	-6.375e-11	-6.53125e-11	-6e-11	-5.46875e-11	-5.9375e-11	-5.90625e-11	-7.09375e-11	-5.34375e-11	-5.78125e-11	-6.78125e-11	-6.03125e-11		-4.15625e-11	-4.53125e-11	-3.59375e-11	-4.46875e-11	-4.8125e-11	-3.5e-11	-4.15625e-11	-4.09375e-11	-4.03125e-11	-3.84375e-11	-3.5e-11	-3.5e-11	-4.15625e-11
-7.28125e-11	-6.625e-11	-6.4375e-11	-6.15625e-11	-6.03125e-11	-5.90625e-11	-5.40625e-11	-6.125e-11	-6.25e-11	-5.46875e-11	-5.5625e-11	-6.25e-11	-6.34375e-11		-4.59375e-11	-4.21875e-11	-4.4375e-11	-4.46875e-11	-4.46875e-11	-3.875e-11	-3.59375e-11	-3.40625e-11	-4.3125e-11	-4.09375e-11	-3.9375e-11	-3.28125e-11	-3.71875e-11
-7.375e-11	-6.8125e-11	-7.0625e-11	-5.5e-11	-6.03125e-11	-5.90625e-11	-5.78125e-11	-6.6875e-11	-6.75e-11	-5.78125e-11	-6.5e-11	-6.65625e-11	-5.75e-11		-4.3125e-11	-4.34375e-11	-4.59375e-11	-4.34375e-11	-4.15625e-11	-3.90625e-11	-3.5e-11	-3.75e-11	-4.03125e-11	-4.0625e-11	-3.90625e-11	-3.15625e-11	-3.71875e-11
-7.46875e-11	-7.34375e-11	-6.15625e-11	-5.46875e-11	-5.65625e-11	-6.1875e-11	-6.03125e-11	-5.9375e-11	-6.84375e-11	-5.6875e-11	-5.6875e-11	-6.375e-11	-5.59375e-11		-3.6875e-11	-3.75e-11	-4.5e-11	-3.65625e-11	-4.96875e-11	-3.90625e-11	-4.15625e-11	-4.03125e-11	-3.9375e-11	-3.9375e-11	-4.28125e-11	-3.78125e-11	-4.03125e-11
-7.8125e-11	-7.0625e-11	-6.9375e-11	-6.21875e-11	-5.4375e-11	-6e-11	-5.40625e-11	-6.40625e-11	-6.25e-11	-5.65625e-11	-5.375e-11	-6.6875e-11	-5.8125e-11		-4.03125e-11	-3.5625e-11	-4.375e-11	-3.65625e-11	-4.65625e-11	-4.03125e-11	-4.5e-11	-4.15625e-11	-3.875e-11	-3.75e-11	-4.125e-11	-4.65625e-11	-3.59375e-11
-7.8125e-11	-6.5e-11	-7.375e-11	-6.5e-11	-6.5e-11	-6.125e-11	-5.1875e-11	-5.90625e-11	-6.1875e-11	-5.25e-11	-5.1875e-11	-6.5e-11	-5.75e-11		-4.34375e-11	-4.125e-11	-4.4375e-11	-3.90625e-11	-3.90625e-11	-4.65625e-11	-4.25e-11	-4.09375e-11	-3.65625e-11	-3.75e-11	-3.8125e-11	-4.28125e-11	-3.4375e-11
-7.5e-11	-6.09375e-11	-6.75e-11	-5.78125e-11	-5.625e-11	-5.78125e-11	-5.3125e-11	-5.90625e-11	-6.4375e-11	-5.5625e-11	-6.375e-11	-6.6875e-11	-5.84375e-11		-3.875e-11	-3.8125e-11	-4.53125e-11	-4.3125e-11	-4.03125e-11	-4.03125e-11	-4.03125e-11	-4.21875e-11	-3.90625e-11	-4.03125e-11	-3.65625e-11	-3.65625e-11	-4.03125e-11
-7.90625e-11	-7.21875e-11	-6.625e-11	-5.90625e-11	-5.65625e-11	-5.46875e-11	-6.5e-11	-6.1875e-11	-6.25e-11	-5.875e-11	-6.21875e-11	-6e-11	-5.78125e-11		-4.5e-11	-4.46875e-11	-4.46875e-11	-4.09375e-11	-3.90625e-11	-4.03125e-11	-4.21875e-11	-4.5e-11	-4.21875e-11	-4.15625e-11	-3.875e-11	-3.71875e-11	-4.40625e-11
-7.1875e-11	-6.46875e-11	-6.5625e-11	-6.4375e-11	-5.46875e-11	-5.96875e-11	-5.28125e-11	-6.03125e-11	-6.625e-11	-5.46875e-11	-5.53125e-11	-6.8125e-11	-5.65625e-11		-4.40625e-11	-4.53125e-11	-4.09375e-11	-4.28125e-11	-4.15625e-11	-4.5e-11	-4.09375e-11	-4.53125e-11	-4.21875e-11	-4.09375e-11	-3.6875e-11	-3.65625e-11	-4.03125e-11
-7.75e-11	-6.875e-11	-7.5625e-11	-6.15625e-11	-5.96875e-11	-6.03125e-11	-6.03125e-11	-6.03125e-11	-6.03125e-11	-5.625e-11	-5.59375e-11	-6.625e-11	-5.75e-11		-4.3125e-11	-4.46875e-11	-4.09375e-11	-4.03125e-11	-4.25e-11	-4.125e-11	-3.78125e-11	-4.15625e-11	-3.78125e-11	-4.03125e-11	-4.1875e-11	-3.28125e-11	-3.71875e-11
-7.5625e-11	-6.21875e-11	-7.28125e-11	-6.46875e-11	-6e-11	-6.15625e-11	-5.65625e-11	-6.15625e-11	-6.6875e-11	-4.9375e-11	-5.71875e-11	-6.625e-11	-5.6875e-11		-4.125e-11	-4.28125e-11	-4.40625e-11	-3.5e-11	-3.84375e-11	-3.9375e-11	-3.71875e-11	-4.53125e-11	-3.6875e-11	-4.0625e-11	-4.03125e-11	-3.75e-11	-3.75e-11
-7.5625e-11	-6.65625e-11	-6.65625e-11	-5.75e-11	-6.15625e-11	-5.375e-11	-5.53125e-11	-5.625e-11	-7e-11	-4.84375e-11	-6.1875e-11	-6.4375e-11	-4.8125e-11		-4.09375e-11	-3.96875e-11	-4.625e-11	-3.8125e-11	-4.1875e-11	-3.84375e-11	-4.03125e-11	-4.3125e-11	-3.9375e-11	-3.75e-11	-3.5625e-11	-3.71875e-11	-4.03125e-11
-7.8125e-11	-5.96875e-11	-6.53125e-11	-6.28125e-11	-5.65625e-11	-6.0625e-11	-4.90625e-11	-5.90625e-11	-6.65625e-11	-5.21875e-11	-6.03125e-11	-7e-11	-5.15625e-11		-4.375e-11	-4.15625e-11	-4.90625e-11	-4.4375e-11	-4.40625e-11	-3.75e-11	-4.03125e-11	-3.65625e-11	-4.15625e-11	-3.90625e-11	-3.34375e-11	-3.96875e-11	-3.84375e-11
-8.09375e-11	-7.25e-11	-7.21875e-11	-5.53125e-11	-5.59375e-11	-5.1875e-11	-5.25e-11	-6.625e-11	-6.5625e-11	-5.59375e-11	-5.9375e-11	-6.53125e-11	-5.65625e-11		-5.15625e-11	-4.53125e-11	-4.40625e-11	-4.34375e-11	-4.34375e-11	-4.125e-11	-4.28125e-11	-4.0625e-11	-4.0625e-11	-3.875e-11	-3.28125e-11	-3.8125e-11	-4.1875e-11
-7.875e-11	-6.9375e-11	-6.6875e-11	-6.15625e-11	-5.9375e-11	-6.09375e-11	-5.40625e-11	-5.8125e-11	-6.71875e-11	-5.96875e-11	-5.96875e-11	-6.53125e-11	-6.09375e-11		-4.5e-11	-4.75e-11	-4.5e-11	-4.65625e-11	-4.5e-11	-4.40625e-11	-3.84375e-11	-4.46875e-11	-4.3125e-11	-4.15625e-11	-3.53125e-11	-3.71875e-11	-4.03125e-11
-7.875e-11	-6.53125e-11	-7.125e-11	-5.96875e-11	-5.71875e-11	-5.90625e-11	-5.6875e-11	-5.875e-11	-6.375e-11	-5.53125e-11	-5.9375e-11	-5.90625e-11	-5.28125e-11		-4.46875e-11	-4.5e-11	-4.53125e-11	-4.71875e-11	-4.09375e-11	-3.875e-11	-3.96875e-11	-4.46875e-11	-4.09375e-11	-3.78125e-11	-3.875e-11	-3.59375e-11	-3.65625e-11
-7.46875e-11	-6.59375e-11	-6.875e-11	-6.09375e-11	-5.6875e-11	-5.40625e-11	-5.40625e-11	-5.78125e-11	-6.53125e-11	-5.53125e-11	-5.53125e-11	-7.46875e-11	-5.03125e-11		-4.65625e-11	-4.65625e-11	-4.28125e-11	-4.28125e-11	-4.15625e-11	-4.0625e-11	-4.21875e-11	-4.15625e-11	-4.4375e-11	-3.5625e-11	-4.03125e-11	-4.21875e-11	-3.84375e-11
-7.71875e-11	-7.28125e-11	-6.09375e-11	-6.65625e-11	-5.5e-11	-6.3125e-11	-5.5e-11	-5.8125e-11	-7e-11	-5.34375e-11	-5.65625e-11	-7.3125e-11	-5.1875e-11		-4.34375e-11	-4.25e-11	-4.34375e-11	-4.59375e-11	-4.5625e-11	-4.09375e-11	-4.15625e-11	-4.5e-11	-4.15625e-11	-3.78125e-11	-4.03125e-11	-3.71875e-11	-4.03125e-11
-7.46875e-11	-6.5e-11	-7.15625e-11	-6.5e-11	-6.09375e-11	-5.40625e-11	-4.90625e-11	-6.625e-11	-5.96875e-11	-5.625e-11	-5.90625e-11	-6.65625e-11	-5.53125e-11		-4.53125e-11	-4.09375e-11	-4.1875e-11	-4.78125e-11	-4.28125e-11	-4.03125e-11	-3.84375e-11	-4.625e-11	-4.28125e-11	-3.84375e-11	-3.84375e-11	-3.75e-11	-3.71875e-11
-7.71875e-11	-6.78125e-11	-7.0625e-11	-6.03125e-11	-5.28125e-11	-6.375e-11	-5.25e-11	-6.09375e-11	-5.90625e-11	-5.78125e-11	-5.6875e-11	-6.09375e-11	-5.59375e-11		-4.28125e-11	-3.84375e-11	-4.46875e-11	-4.84375e-11	-4.25e-11	-4.03125e-11	-4.0625e-11	-4.21875e-11	-4.09375e-11	-3.90625e-11	-3.90625e-11	-3.59375e-11	-3.71875e-11
-7.65625e-11	-6.40625e-11	-7.09375e-11	-5.875e-11	-5.90625e-11	-5.90625e-11	-5.15625e-11	-6.5625e-11	-6.75e-11	-5.59375e-11	-6.4375e-11	-6.78125e-11	-5.78125e-11		-4.375e-11	-4.03125e-11	-4.5625e-11	-4.8125e-11	-4.1875e-11	-4.375e-11	-3.84375e-11	-3.78125e-11	-4.03125e-11	-3.65625e-11	-3.9375e-11	-4.09375e-11	-3.6875e-11
-8.25e-11	-6.53125e-11	-6.4375e-11	-6.46875e-11	-5.8125e-11	-6.46875e-11	-5.65625e-11	-6.1875e-11	-6.5625e-11	-5.9375e-11	-6.40625e-11	-6.28125e-11	-5.78125e-11		-4.1875e-11	-4.0625e-11	-4.65625e-11	-3.90625e-11	-4.4375e-11	-4.28125e-11	-4.28125e-11	-3.78125e-11	-3.625e-11	-3.6875e-11	-3.84375e-11	-3.96875e-11	-4.03125e-11
-7.53125e-11	-7.28125e-11	-7.21875e-11	-5.78125e-11	-5.90625e-11	-6.0625e-11	-4.65625e-11	-6.03125e-11	-6.5e-11	-5.96875e-11	-6.09375e-11	-7.09375e-11	-5.625e-11		-4.28125e-11	-4.28125e-11	-4.5e-11	-3.5e-11	-4.34375e-11	-4.40625e-11	-4.09375e-11	-4.1875e-11	-3.375e-11	-3.40625e-11	-4.125e-11	-3.28125e-11	-3.71875e-11
-7.53125e-11	-7.09375e-11	-6.9375e-11	-6.34375e-11	-5.65625e-11	-5.9375e-11	-5.71875e-11	-5.5e-11	-5.90625e-11	-6e-11	-5.4375e-11	-6.71875e-11	-5e-11		-4.28125e-11	-4.28125e-11	-4.59375e-11	-3.96875e-11	-4.03125e-11	-4.09375e-11	-5.15625e-11	-4.09375e-11	-4.15625e-11	-3.5e-11	-4.03125e-11	-3.625e-11	-3.78125e-11
-7.3125e-11	-6.6875e-11	-6.46875e-11	-5.53125e-11	-5.46875e-11	-5.4375e-11	-5.40625e-11	-5.78125e-11	-6.5625e-11	-5.25e-11	-6.40625e-11	-6.5e-11	-5.9375e-11		-4.65625e-11	-3.90625e-11	-4.875e-11	-3.8125e-11	-3.5625e-11	-4.28125e-11	-4.53125e-11	-4.1875e-11	-4.1875e-11	-3.46875e-11	-4.15625e-11	-3.53125e-11	-3.625e-11
-7.5625e-11	-6.65625e-11	-6.65625e-11	-5.6875e-11	-5.625e-11	-6.28125e-11	-4.96875e-11	-6.5e-11	-6.21875e-11	-5.625e-11	-6.5e-11	-7.28125e-11	-5.78125e-11		-4.15625e-11	-3.9375e-11	-4.53125e-11	-3.8125e-11	-3.96875e-11	-4.15625e-11	-3.90625e-11	-3.875e-11	-4.4375e-11	-4.03125e-11	-3.34375e-11	-3.8125e-11	-3.46875e-11
-7.53125e-11	-6.9375e-11	-6.90625e-11	-6.5e-11	-5.71875e-11	-6.34375e-11	-5.375e-11	-6.5e-11	-6.40625e-11	-5.53125e-11	-6e-11	-6.8125e-11	-5.90625e-11		-3.78125e-11	-3.71875e-11	-4.40625e-11	-4.40625e-11	-4.15625e-11	-3.90625e-11	-3.84375e-11	-4.15625e-11	-3.78125e-11	-4.03125e-11	-3.75e-11	-3.875e-11	-4.03125e-11
-7.65625e-11	-6.90625e-11	-6.71875e-11	-6.09375e-11	-5.78125e-11	-6.03125e-11	-5.21875e-11	-5.84375e-11	-6.34375e-11	-5.4375e-11	-6.59375e-11	-6.875e-11	-5.78125e-11		-4.125e-11	-4.375e-11	-4.03125e-11	-4.46875e-11	-4.03125e-11	-4.03125e-11	-4.15625e-11	-4.15625e-11	-3.65625e-11	-3.9375e-11	-4.21875e-11	-3.75e-11	-4.375e-11
-7.6875e-11	-7.21875e-11	-6.75e-11	-6.125e-11	-5.40625e-11	-5.40625e-11	-5.59375e-11	-6.5e-11	-6.3125e-11	-5.71875e-11	-6.40625e-11	-6.21875e-11	-5.90625e-11		-4.28125e-11	-5.03125e-11	-3.84375e-11	-4.5e-11	-4.28125e-11	-3.90625e-11	-4.53125e-11	-4.21875e-11	-4.1875e-11	-4.28125e-11	-4.03125e-11	-4.09375e-11	-4.15625e-11
-8.09375e-11	-7.15625e-11	-6.90625e-11	-6.46875e-11	-6e-11	-5.28125e-11	-5.03125e-11	-6.21875e-11	-6.09375e-11	-5.8125e-11	-6.90625e-11	-6.03125e-11	-5.5e-11		-4.21875e-11	-4.4375e-11	-3.75e-11	-4.15625e-11	-4.15625e-11	-3.875e-11	-4.09375e-11	-3.8125e-11	-4.09375e-11	-3.6875e-11	-3.9375e-11	-4.46875e-11	-3.8125e-11
-7.78125e-11	-6.25e-11	-6.6875e-11	-6.59375e-11	-5.4375e-11	-5.84375e-11	-4.84375e-11	-6.28125e-11	-6.5e-11	-5.84375e-11	-6.21875e-11	-6.96875e-11	-5.6875e-11		-4.21875e-11	-3.875e-11	-4.25e-11	-4.03125e-11	-4.03125e-11	-3.9375e-11	-4.03125e-11	-4.46875e-11	-3.8125e-11	-3.78125e-11	-3.8125e-11	-3.875e-11	-3.875e-11
-7.40625e-11	-6.71875e-11	-7.25e-11	-6.6875e-11	-5.15625e-11	-6.03125e-11	-5.28125e-11	-6.03125e-11	-7.125e-11	-5.1875e-11	-6.1875e-11	-7.53125e-11	-5.84375e-11		-4.4375e-11	-4.28125e-11	-4.1875e-11	-4.40625e-11	-4.75e-11	-4.34375e-11	-4.5e-11	-3.90625e-11	-3.9375e-11	-4.03125e-11	-4.09375e-11	-4e-11	-4.5e-11
-7.90625e-11	-7.15625e-11	-6.59375e-11	-6.03125e-11	-5.21875e-11	-6.40625e-11	-5.0625e-11	-5.9375e-11	-6.1875e-11	-5.53125e-11	-5.90625e-11	-6.8125e-11	-6.03125e-11		-4.65625e-11	-4.53125e-11	-3.75e-11	-4.78125e-11	-4.125e-11	-4.375e-11	-4.34375e-11	-3.8125e-11	-3.8125e-11	-3.96875e-11	-4.15625e-11	-3.78125e-11	-3.28125e-11
-7.5e-11	-6.8125e-11	-6.78125e-11	-5.4375e-11	-5.875e-11	-5.8125e-11	-5e-11	-5.6875e-11	-6.9375e-11	-5.84375e-11	-6.71875e-11	-6.78125e-11	-5.46875e-11		-4.4375e-11	-4.1875e-11	-4.03125e-11	-4.3125e-11	-3.75e-11	-3.90625e-11	-4.03125e-11	-3.8125e-11	-3.84375e-11	-3.6875e-11	-3.5e-11	-3.65625e-11	-3.4375e-11
-8.625e-11	-6.25e-11	-7.125e-11	-6.0625e-11	-5.34375e-11	-5.78125e-11	-6.0625e-11	-6.34375e-11	-6.46875e-11	-6.09375e-11	-6.34375e-11	-6.5e-11	-5.0625e-11		-4.4375e-11	-3.875e-11	-3.90625e-11	-3.6875e-11	-4.40625e-11	-3.875e-11	-4.09375e-11	-3.46875e-11	-4.0625e-11	-4.21875e-11	-3.34375e-11	-3.40625e-11	-3.84375e-11
-7.1875e-11	-7.15625e-11	-7.78125e-11	-6.25e-11	-5.96875e-11	-5.90625e-11	-4.9375e-11	-5.84375e-11	-6.3125e-11	-5.40625e-11	-6.0625e-11	-6e-11	-5.65625e-11		-4.0625e-11	-3.78125e-11	-4.625e-11	-4.03125e-11	-4.03125e-11	-3.90625e-11	-4.09375e-11	-3.875e-11	-4.4375e-11	-3.78125e-11	-3.5e-11	-3.46875e-11	-3.9375e-11
-8.03125e-11	-7.53125e-11	-6.84375e-11	-6.09375e-11	-5.0625e-11	-5.09375e-11	-5.3125e-11	-5.84375e-11	-6.96875e-11	-5.59375e-11	-5.78125e-11	-7.46875e-11	-5.40625e-11		-3.6875e-11	-4.6875e-11	-4.53125e-11	-4.15625e-11	-4.25e-11	-4.28125e-11	-4.09375e-11	-4.28125e-11	-4.40625e-11	-4.03125e-11	-3.34375e-11	-3.65625e-11	-3.78125e-11
-7.78125e-11	-6.96875e-11	-6.75e-11	-6.5625e-11	-5.03125e-11	-6.03125e-11	-5.46875e-11	-5.875e-11	-7e-11	-6e-11	-5.875e-11	-6.46875e-11	-5.34375e-11		-4.09375e-11	-4.84375e-11	-4.90625e-11	-4.25e-11	-4.03125e-11	-4.09375e-11	-3.71875e-11	-4.28125e-11	-4.21875e-11	-4.1875e-11	-3.625e-11	-4.125e-11	-4.09375e-11
-8.15625e-11	-6.21875e-11	-6.5625e-11	-6.59375e-11	-5.5625e-11	-5.34375e-11	-4.78125e-11	-6.21875e-11	-6.65625e-11	-5.65625e-11	-6e-11	-6.375e-11	-5.59375e-11		-4.21875e-11	-4.34375e-11	-4.25e-11	-4.21875e-11	-4.46875e-11	-3.1875e-11	-4.1875e-11	-4.03125e-11	-3.84375e-11	-4.03125e-11	-4.1875e-11	-3.53125e-11	-3.625e-11
-7.875e-11	-6.375e-11	-7e-11	-6.03125e-11	-5.1875e-11	-5.03125e-11	-5.125e-11	-7e-11	-6.84375e-11	-5.46875e-11	-6.53125e-11	-6.40625e-11	-6.0625e-11		-4.28125e-11	-4.03125e-11	-4.5e-11	-3.96875e-11	-4.59375e-11	-3.90625e-11	-4.0625e-11	-3.65625e-11	-4.09375e-11	-3.78125e-11	-3.78125e-11	-3.90625e-11	-3.75e-11
-7.4375e-11	-6.0625e-11	-6.5e-11	-6.21875e-11	-5.6875e-11	-6.03125e-11	-5.5625e-11	-5.6875e-11	-6.03125e-11	-5.28125e-11	-6.53125e-11	-6.90625e-11	-5.75e-11		-4.65625e-11	-3.84375e-11	-4.78125e-11	-4.09375e-11	-4e-11	-3.8125e-11	-4.03125e-11	-3.75e-11	-3.78125e-11	-3.90625e-11	-4.03125e-11	-3.53125e-11	-3.53125e-11
-7.21875e-11	-6.375e-11	-6.5625e-11	-6.25e-11	-5.875e-11	-5.34375e-11	-4.90625e-11	-6.375e-11	-6.40625e-11	-5.5625e-11	-5.46875e-11	-6.84375e-11	-6.5625e-11		-4.84375e-11	-4.03125e-11	-4.78125e-11	-4.84375e-11	-4.53125e-11	-4.15625e-11	-3.9375e-11	-4.125e-11	-3.90625e-11	-4.25e-11	-4.125e-11	-3.59375e-11	-3.71875e-11
-7.90625e-11	-6.375e-11	-7e-11	-6.34375e-11	-5.28125e-11	-5.125e-11	-4.9375e-11	-5.6875e-11	-6.65625e-11	-5.6875e-11	-6.03125e-11	-6.5e-11	-5.8125e-11		-5.125e-11	-4.4375e-11	-4.53125e-11	-4.1875e-11	-4.03125e-11	-4.125e-11	-4.1875e-11	-4.03125e-11	-3.84375e-11	-3.78125e-11	-3.875e-11	-4.03125e-11	-3.53125e-11
-8.03125e-11	-6.5625e-11	-6.59375e-11	-6.3125e-11	-5.6875e-11	-6.5e-11	-5e-11	-6.0625e-11	-6.40625e-11	-6.03125e-11	-6.34375e-11	-6.28125e-11	-5.875e-11		-4.0625e-11	-4.0625e-11	-4.5625e-11	-3.46875e-11	-3.84375e-11	-3.625e-11	-4.40625e-11	-3.9375e-11	-4.40625e-11	-3.53125e-11	-3.90625e-11	-3.53125e-11	-3.96875e-11
-7.5e-11	-6.0625e-11	-6.4375e-11	-7.03125e-11	-5.1875e-11	-5.28125e-11	-5.4375e-11	-5.8125e-11	-6.53125e-11	-5.03125e-11	-6.03125e-11	-6.21875e-11	-5.34375e-11		-4.09375e-11	-4.03125e-11	-4.4375e-11	-3.8125e-11	-4.28125e-11	-3.65625e-11	-4.125e-11	-4.03125e-11	-3.90625e-11	-3.71875e-11	-4.03125e-11	-3.6875e-11	-3.96875e-11
-7.5e-11	-6.3125e-11	-7.1875e-11	-5.75e-11	-5.65625e-11	-5.53125e-11	-4.53125e-11	-6.03125e-11	-5.78125e-11	-5.65625e-11	-6.4375e-11	-5.78125e-11	-5.5625e-11		-4.09375e-11	-4.0625e-11	-4.65625e-11	-4.1875e-11	-3.78125e-11	-4.125e-11	-4.28125e-11	-4.34375e-11	-4.125e-11	-4.15625e-11	-3.84375e-11	-3.84375e-11	-3.8125e-11
-7.65625e-11	-6.1875e-11	-6.65625e-11	-6.15625e-11	-5.5625e-11	-5.59375e-11	-5.5e-11	-6.09375e-11	-6.03125e-11	-6.21875e-11	-6.15625e-11	-6.53125e-11	-6.375e-11		-4.4375e-11	-4.0625e-11	-4.46875e-11	-4.03125e-11	-4.125e-11	-4.34375e-11	-4.03125e-11	-4.28125e-11	-3.71875e-11	-4.28125e-11	-3.84375e-11	-4.21875e-11	-3.78125e-11
-7.71875e-11	-7.09375e-11	-6.5e-11	-5.5625e-11	-5.34375e-11	-5.78125e-11	-5.6875e-11	-5.9375e-11	-6.46875e-11	-5.90625e-11	-6.75e-11	-6.1875e-11	-5.625e-11		-4.4375e-11	-4.53125e-11	-4.21875e-11	-4.3125e-11	-4.46875e-11	-4.40625e-11	-4.5e-11	-4.25e-11	-4.34375e-11	-4.125e-11	-3.53125e-11	-3.8125e-11	-3.9375e-11
-7.03125e-11	-6.53125e-11	-6.03125e-11	-5.40625e-11	-5.90625e-11	-6e-11	-5.375e-11	-6.65625e-11	-6.8125e-11	-5.8125e-11	-5.6875e-11	-7.0625e-11	-5.15625e-11		-4.46875e-11	-4.40625e-11	-4.09375e-11	-3.875e-11	-4.4375e-11	-4.46875e-11	-4.46875e-11	-4.40625e-11	-4.34375e-11	-3.78125e-11	-3.53125e-11	-3.96875e-11	-4.0625e-11
-7.6875e-11	-6.28125e-11	-6.625e-11	-6.46875e-11	-6.03125e-11	-5.65625e-11	-5.875e-11	-6.40625e-11	-5.59375e-11	-5.5625e-11	-5.96875e-11	-6.9375e-11	-5.8125e-11		-4.46875e-11	-3.84375e-11	-4.21875e-11	-4.15625e-11	-4.5e-11	-4.5e-11	-4.03125e-11	-4.46875e-11	-4.375e-11	-3.46875e-11	-3.59375e-11	-3.53125e-11	-3.375e-11
-7.84375e-11	-6.9375e-11	-6.40625e-11	-5.90625e-11	-5.90625e-11	-6.0625e-11	-5.9375e-11	-6.15625e-11	-5.59375e-11	-6.15625e-11	-6.78125e-11	-6.375e-11	-5.59375e-11		-4.8125e-11	-4.21875e-11	-4.375e-11	-4.96875e-11	-4.59375e-11	-4.09375e-11	-3.65625e-11	-4.0625e-11	-4.0625e-11	-4.15625e-11	-4.03125e-11	-4.125e-11	-3.5e-11
-7.375e-11	-6.96875e-11	-7.03125e-11	-5.6875e-11	-6.1875e-11	-6.5e-11	-5.21875e-11	-5.65625e-11	-5.96875e-11	-5.5e-11	-5.25e-11	-6.0625e-11	-6.65625e-11		-4.9375e-11	-3.78125e-11	-4.40625e-11	-4.5625e-11	-4.5e-11	-4.25e-11	-4.28125e-11	-3.59375e-11	-3.8125e-11	-4.09375e-11	-3.65625e-11	-3.40625e-11	-4.5e-11
-7.46875e-11	-6.375e-11	-6.0625e-11	-5.5e-11	-5.84375e-11	-6.21875e-11	-4.84375e-11	-5.78125e-11	-6.3125e-11	-5.6875e-11	-6.125e-11	-6.28125e-11	-5.5625e-11		-4.40625e-11	-4.0625e-11	-4.03125e-11	-4.21875e-11	-4.34375e-11	-4.40625e-11	-4.78125e-11	-3.5e-11	-4.03125e-11	-3.53125e-11	-4.03125e-11	-3.84375e-11	-4.03125e-11
-7.1875e-11	-6.65625e-11	-6.625e-11	-5.5625e-11	-5.6875e-11	-5.65625e-11	-5.09375e-11	-6.5e-11	-6.53125e-11	-6.15625e-11	-5.34375e-11	-6.9375e-11	-5.6875e-11		-4.46875e-11	-4.4375e-11	-3.84375e-11	-3.90625e-11	-4.28125e-11	-3.9375e-11	-4.28125e-11	-3.9375e-11	-4.09375e-11	-4.03125e-11	-3.78125e-11	-3.75e-11	-3.59375e-11
-7.53125e-11	-6.71875e-11	-6.53125e-11	-6.65625e-11	-5.40625e-11	-6.15625e-11	-5e-11	-6e-11	-6.9375e-11	-5.71875e-11	-5.59375e-11	-6.53125e-11	-6e-11		-3.71875e-11	-4.28125e-11	-4.28125e-11	-3.5e-11	-3.90625e-11	-4.1875e-11	-4.0625e-11	-4.1875e-11	-3.71875e-11	-3.75e-11	-4.03125e-11	-3.78125e-11	-4.03125e-11
-7.875e-11	-6.8125e-11	-6.65625e-11	-6.15625e-11	-5.8125e-11	-5.96875e-11	-5.5625e-11	-5.78125e-11	-6.15625e-11	-5.5625e-11	-5.96875e-11	-6.0625e-11	-5.75e-11		-4.28125e-11	-4.1875e-11	-4.53125e-11	-3.625e-11	-4.375e-11	-4.09375e-11	-4.125e-11	-4.375e-11	-3.78125e-11	-3.71875e-11	-3.9375e-11	-4.09375e-11	-4.25e-11
-7.5e-11	-6.8125e-11	-7.15625e-11	-6.34375e-11	-5.6875e-11	-5.53125e-11	-5.3125e-11	-5.71875e-11	-6.625e-11	-5.5e-11	-5.65625e-11	-6.15625e-11	-6.03125e-11		-4.40625e-11	-3.9375e-11	-4.46875e-11	-4.3125e-11	-4.59375e-11	-3.8125e-11	-3.90625e-11	-4.21875e-11	-3.53125e-11	-3.96875e-11	-3.5e-11	-3.875e-11	-4.09375e-11
-7.3125e-11	-6.84375e-11	-7.125e-11	-5.78125e-11	-6.1875e-11	-5.84375e-11	-5e-11	-5.9375e-11	-6.3125e-11	-5.375e-11	-6.34375e-11	-6.4375e-11	-5.5e-11		-4.375e-11	-3.84375e-11	-3.96875e-11	-4.59375e-11	-4.34375e-11	-3.78125e-11	-3.53125e-11	-3.90625e-11	-3.5625e-11	-4.03125e-11	-3.59375e-11	-3.71875e-11	-4.0625e-11
-7.65625e-11	-7.0625e-11	-6.78125e-11	-5.75e-11	-5.65625e-11	-6.03125e-11	-4.59375e-11	-5.875e-11	-6.59375e-11	-5.375e-11	-5.34375e-11	-6.625e-11	-5.6875e-11		-4.75e-11	-3.625e-11	-4.40625e-11	-4.3125e-11	-4.03125e-11	-4.25e-11	-4.0625e-11	-3.90625e-11	-3.40625e-11	-3.9375e-11	-3.875e-11	-3.21875e-11	-3.90625e-11
-8.09375e-11	-7.5e-11	-6.625e-11	-6.03125e-11	-5.40625e-11	-6.28125e-11	-5.90625e-11	-5.5625e-11	-6.625e-11	-5.15625e-11	-5.90625e-11	-6.6875e-11	-6.53125e-11		-4.9375e-11	-4.5e-11	-4.5e-11	-4.40625e-11	-4.0625e-11	-3.9375e-11	-4.0625e-11	-4.34375e-11	-4.3125e-11	-3.625e-11	-3.53125e-11	-3.21875e-11	-3.1875e-11
-7.03125e-11	-6.9375e-11	-6.59375e-11	-6.4375e-11	-5.59375e-11	-6.4375e-11	-5.6875e-11	-5.28125e-11	-6.5625e-11	-5.40625e-11	-5.65625e-11	-5.9375e-11	-5.875e-11		-4.71875e-11	-4.9375e-11	-4.5e-11	-4.34375e-11	-3.9375e-11	-4.09375e-11	-4.03125e-11	-4.28125e-11	-3.9375e-11	-3.875e-11	-3.15625e-11	-3.46875e-11	-4.0625e-11
-7.53125e-11	-6.75e-11	-6.78125e-11	-5.875e-11	-6.09375e-11	-6.40625e-11	-4.65625e-11	-5.53125e-11	-5.40625e-11	-5.15625e-11	-5.90625e-11	-6.3125e-11	-5.40625e-11		-4.34375e-11	-4.5625e-11	-4.40625e-11	-4.03125e-11	-4.34375e-11	-4.28125e-11	-4.15625e-11	-4.40625e-11	-4.15625e-11	-3.5625e-11	-3.875e-11	-3.375e-11	-4.59375e-11
-7.5625e-11	-6.8125e-11	-6.53125e-11	-6.5625e-11	-5.28125e-11	-6.5625e-11	-5.5e-11	-6.0625e-11	-6.21875e-11	-6.375e-11	-6.03125e-11	-5.96875e-11	-5.71875e-11		-3.9375e-11	-4.21875e-11	-4.125e-11	-3.9375e-11	-4.53125e-11	-4.25e-11	-3.71875e-11	-4.3125e-11	-3.8125e-11	-3.78125e-11	-4.03125e-11	-3.9375e-11	-4.03125e-11
-7.84375e-11	-6.84375e-11	-6.6875e-11	-5.84375e-11	-5.6875e-11	-6.15625e-11	-4.8125e-11	-6.46875e-11	-6.3125e-11	-5.3125e-11	-5.15625e-11	-6.21875e-11	-6.09375e-11		-3.90625e-11	-4.28125e-11	-4.03125e-11	-4.1875e-11	-4.53125e-11	-3.90625e-11	-3.8125e-11	-4.15625e-11	-3.59375e-11	-3.65625e-11	-3.65625e-11	-3.84375e-11	-3.78125e-11
-7.34375e-11	-6.1875e-11	-6.84375e-11	-5.90625e-11	-5.375e-11	-5.6875e-11	-4.40625e-11	-5.53125e-11	-5.4375e-11	-4.90625e-11	-6.28125e-11	-6.28125e-11	-5.4375e-11		-4.03125e-11	-4.15625e-11	-4.46875e-11	-4.59375e-11	-3.90625e-11	-3.9375e-11	-3.9375e-11	-3.6875e-11	-3.8125e-11	-3.78125e-11	-3.90625e-11	-4.21875e-11	-3.9375e-11
-7.84375e-11	-6.875e-11	-6.84375e-11	-6.25e-11	-5.28125e-11	-5.6875e-11	-5.1875e-11	-5.53125e-11	-5.875e-11	-5.0625e-11	-6.0625e-11	-6.46875e-11	-5.46875e-11		-4.40625e-11	-3.90625e-11	-4.28125e-11	-4.375e-11	-4.40625e-11	-3.8125e-11	-4.03125e-11	-4.0625e-11	-3.875e-11	-3.78125e-11	-3.5625e-11	-4.5625e-11	-3.1875e-11
-7.53125e-11	-6.53125e-11	-6.4375e-11	-6.65625e-11	-5.3125e-11	-6.4375e-11	-5.15625e-11	-6.65625e-11	-6.625e-11	-5.53125e-11	-5.40625e-11	-6.09375e-11	-5.875e-11		-4.28125e-11	-4.3125e-11	-4.875e-11	-3.90625e-11	-4.625e-11	-3.9375e-11	-4.46875e-11	-4.40625e-11	-3.03125e-11	-4.03125e-11	-3.75e-11	-4.3125e-11	-4.25e-11
-6.84375e-11	-6.3125e-11	-6.59375e-11	-6e-11	-5.59375e-11	-6.3125e-11	-5.21875e-11	-5.78125e-11	-6e-11	-5.59375e-11	-6.03125e-11	-6.28125e-11	-5.71875e-11		-4.21875e-11	-4.40625e-11	-4.28125e-11	-4.03125e-11	-4.5625e-11	-4.03125e-11	-4.03125e-11	-3.90625e-11	-3.59375e-11	-3.96875e-11	-3.84375e-11	-4.09375e-11	-4.21875e-11
-8.15625e-11	-6.28125e-11	-7.125e-11	-6.03125e-11	-5.9375e-11	-5.90625e-11	-5.1875e-11	-5.53125e-11	-5.71875e-11	-5.3125e-11	-5.5625e-11	-6.15625e-11	-5.78125e-11		-4.3125e-11	-3.71875e-11	-4.21875e-11	-4.59375e-11	-4.3125e-11	-4.5e-11	-3.9375e-11	-3.90625e-11	-4.0625e-11	-4.3125e-11	-3.5e-11	-4.03125e-11	-3.84375e-11
-7.09375e-11	-6.78125e-11	-6.65625e-11	-5.90625e-11	-6.53125e-11	-6.1875e-11	-4.90625e-11	-5.71875e-11	-5.84375e-11	-5.5e-11	-6.1875e-11	-6.6875e-11	-5.53125e-11		-3.9375e-11	-4.15625e-11	-4.21875e-11	-5.03125e-11	-3.875e-11	-4.28125e-11	-4.34375e-11	-4.125e-11	-4.03125e-11	-4.125e-11	-3.9375e-11	-3.375e-11	-3.96875e-11
-7.625e-11	-6.15625e-11	-6.5e-11	-5.9375e-11	-5.6875e-11	-6.53125e-11	-5.125e-11	-5.5e-11	-6.53125e-11	-5.65625e-11	-5.5e-11	-6.625e-11	-5.9375e-11		-3.84375e-11	-4.25e-11	-3.875e-11	-4.0625e-11	-3.65625e-11	-4.46875e-11	-4.375e-11	-4.34375e-11	-4.21875e-11	-4.03125e-11	-4.53125e-11	-3.40625e-11	-4.34375e-11
-7.34375e-11	-6.6875e-11	-6.09375e-11	-5.71875e-11	-5.96875e-11	-6.78125e-11	-5.21875e-11	-5.90625e-11	-6.46875e-11	-5.15625e-11	-5.6875e-11	-6.65625e-11	-5.71875e-11		-4.625e-11	-4.125e-11	-4.125e-11	-3.875e-11	-4.21875e-11	-4.28125e-11	-4.21875e-11	-4.40625e-11	-4.375e-11	-4.21875e-11	-4.125e-11	-3.6875e-11	-3.8125e-11
-7.3125e-11	-6.625e-11	-6.15625e-11	-5.71875e-11	-6.03125e-11	-6.34375e-11	-4.9375e-11	-5.625e-11	-6.6875e-11	-5.0625e-11	-6.21875e-11	-6.125e-11	-5.875e-11		-4.5e-11	-4.40625e-11	-4.1875e-11	-4.15625e-11	-4.65625e-11	-4.15625e-11	-4.5625e-11	-4.03125e-11	-4.28125e-11	-3.59375e-11	-3.8125e-11	-3.625e-11	-3.46875e-11
-7.8125e-11	-6.5e-11	-7.53125e-11	-6.03125e-11	-6.03125e-11	-6.40625e-11	-5e-11	-6.125e-11	-6.09375e-11	-4.96875e-11	-5.71875e-11	-6.5e-11	-5.15625e-11		-4.875e-11	-4.65625e-11	-4.4375e-11	-4.71875e-11	-4.03125e-11	-4.40625e-11	-4.03125e-11	-4.1875e-11	-3.59375e-11	-3.53125e-11	-3.6875e-11	-3.65625e-11	-3.46875e-11
-8.03125e-11	-7.0625e-11	-6.5e-11	-6.6875e-11	-5.90625e-11	-5.9375e-11	-5.65625e-11	-5.4375e-11	-5.46875e-11	-5.59375e-11	-6.3125e-11	-5.78125e-11	-5.53125e-11		-5.03125e-11	-4.5625e-11	-4.5e-11	-4.125e-11	-3.84375e-11	-4.40625e-11	-3.46875e-11	-3.78125e-11	-4.09375e-11	-3.46875e-11	-4.125e-11	-3.96875e-11	-3.4375e-11
-6.9375e-11	-6.53125e-11	-6.40625e-11	-6.15625e-11	-6.03125e-11	-6.0625e-11	-5.5625e-11	-6.375e-11	-6.53125e-11	-5.3125e-11	-5.84375e-11	-6.65625e-11	-5.03125e-11		-4.5e-11	-4.03125e-11	-4.6875e-11	-4.53125e-11	-4.0625e-11	-3.65625e-11	-4.09375e-11	-4.15625e-11	-3.8125e-11	-4.03125e-11	-3.65625e-11	-3.90625e-11	-3.59375e-11
-6.84375e-11	-7.28125e-11	-7e-11	-5.78125e-11	-5.1875e-11	-5.65625e-11	-5.6875e-11	-6.15625e-11	-6.5e-11	-5.875e-11	-6.03125e-11	-6.0625e-11	-5.5e-11		-3.78125e-11	-3.875e-11	-3.875e-11	-4.375e-11	-4.28125e-11	-3.46875e-11	-4.03125e-11	-4.90625e-11	-3.5625e-11	-4.21875e-11	-3.625e-11	-3.90625e-11	-3.6875e-11
-8.15625e-11	-6.875e-11	-6.6875e-11	-6.1875e-11	-6.15625e-11	-5.96875e-11	-5.65625e-11	-6.21875e-11	-6.15625e-11	-5.1875e-11	-5.53125e-11	-6.71875e-11	-5.28125e-11		-4.0625e-11	-3.5e-11	-4.0625e-11	-4.53125e-11	-4.4375e-11	-3.71875e-11	-3.65625e-11	-4.5e-11	-3.9375e-11	-4.1875e-11	-3.8125e-11	-4.40625e-11	-4.125e-11
-7.78125e-11	-6.84375e-11	-6.84375e-11	-6.125e-11	-5.5e-11	-5.625e-11	-5.4375e-11	-6e-11	-6.4375e-11	-5.84375e-11	-6.21875e-11	-6.5e-11	-5.21875e-11		-4.1875e-11	-3.96875e-11	-4.5e-11	-4.34375e-11	-4.09375e-11	-3.6875e-11	-3.6875e-11	-4.09375e-11	-4.5e-11	-3.75e-11	-3.6875e-11	-3.9375e-11	-4.21875e-11
-8.15625e-11	-7.28125e-11	-6.84375e-11	-5.84375e-11	-5.90625e-11	-5.59375e-11	-5.90625e-11	-6.28125e-11	-6.1875e-11	-5.34375e-11	-5.46875e-11	-6.5e-11	-5.4375e-11		-4.25e-11	-4.125e-11	-4.5e-11	-4.1875e-11	-4.09375e-11	-3.90625e-11	-4.03125e-11	-4.15625e-11	-4.0625e-11	-3.78125e-11	-3.90625e-11	-3.71875e-11	-4.40625e-11
-8.125e-11	-6.71875e-11	-6.53125e-11	-6.5e-11	-5.65625e-11	-5.90625e-11	-5e-11	-5.875e-11	-6.15625e-11	-5.65625e-11	-5.46875e-11	-6.28125e-11	-6.09375e-11		-4.0625e-11	-3.90625e-11	-4.28125e-11	-4.40625e-11	-3.96875e-11	-3.78125e-11	-4.125e-11	-4.375e-11	-3.84375e-11	-3.65625e-11	-3.75e-11	-3.59375e-11	-3.78125e-11
-7.46875e-11	-6.46875e-11	-6.6875e-11	-6.34375e-11	-6.1875e-11	-5.9375e-11	-4.9375e-11	-5.3125e-11	-6.1875e-11	-5.84375e-11	-6.3125e-11	-6.4375e-11	-5.59375e-11		-4.59375e-11	-4.28125e-11	-4.0625e-11	-4.28125e-11	-3.90625e-11	-3.3125e-11	-3.90625e-11	-3.96875e-11	-4.125e-11	-3.625e-11	-4.25e-11	-3.53125e-11	-3.5e-11
-8.03125e-11	-7.46875e-11	-6.84375e-11	-5.71875e-11	-5.375e-11	-5.78125e-11	-5.65625e-11	-6.21875e-11	-6.65625e-11	-5.5e-11	-5.5e-11	-6.78125e-11	-6.125e-11		-4.5e-11	-4.03125e-11	-3.84375e-11	-4.34375e-11	-3.8125e-11	-3.90625e-11	-4.03125e-11	-4.03125e-11	-3.71875e-11	-3.5625e-11	-4.4375e-11	-3.78125e-11	-3.90625e-11
-8.3125e-11	-6.75e-11	-6.78125e-11	-6.71875e-11	-5.78125e-11	-6.1875e-11	-5.65625e-11	-6.1875e-11	-6.28125e-11	-5.9375e-11	-5.40625e-11	-6.90625e-11	-6.03125e-11		-4.21875e-11	-4.46875e-11	-3.96875e-11	-4.3125e-11	-4.4375e-11	-4.0625e-11	-4.28125e-11	-4.28125e-11	-3.1875e-11	-3.9375e-11	-4.1875e-11	-4.03125e-11	-4.25e-11
-7.6875e-11	-7.03125e-11	-6.25e-11	-6.6875e-11	-5.6875e-11	-5.71875e-11	-5.65625e-11	-5.40625e-11	-6.125e-11	-5.78125e-11	-5.6875e-11	-6.78125e-11	-5.375e-11		-3.90625e-11	-4.40625e-11	-4.03125e-11	-4e-11	-4.25e-11	-3.5e-11	-4.25e-11	-4.3125e-11	-3.5e-11	-3.78125e-11	-4.28125e-11	-4.15625e-11	-4.15625e-11
-7.21875e-11	-7.09375e-11	-6.59375e-11	-5.96875e-11	-5.40625e-11	-5.5e-11	-5.21875e-11	-6.5e-11	-6.125e-11	-6.09375e-11	-6.28125e-11	-6.84375e-11	-5.9375e-11		-4.6875e-11	-5.03125e-11	-4.15625e-11	-4.375e-11	-4.15625e-11	-3.9375e-11	-4.4375e-11	-4.46875e-11	-4.40625e-11	-3.125e-11	-4.03125e-11	-3.65625e-11	-3.78125e-11
-7.59375e-11	-6.84375e-11	-6.78125e-11	-6.59375e-11	-6.03125e-11	-5.65625e-11	-5.6875e-11	-6.34375e-11	-6.46875e-11	-6.0625e-11	-5.40625e-11	-7.25e-11	-5.03125e-11		-4.65625e-11	-4.53125e-11	-4.375e-11	-4.21875e-11	-4.40625e-11	-4.40625e-11	-4.28125e-11	-4.34375e-11	-4.3125e-11	-3.90625e-11	-3.65625e-11	-3.3125e-11	-3.46875e-11
-7.25e-11	-6.875e-11	-6.84375e-11	-6.53125e-11	-6.15625e-11	-5.90625e-11	-5.90625e-11	-6.09375e-11	-6.6875e-11	-5.5e-11	-5.65625e-11	-6.4375e-11	-6.0625e-11		-4.46875e-11	-4.03125e-11	-4.03125e-11	-4.28125e-11	-4.34375e-11	-3.71875e-11	-3.96875e-11	-4.53125e-11	-4.09375e-11	-3.90625e-11	-3.75e-11	-3.40625e-11	-4.09375e-11
-7.59375e-11	-6.78125e-11	-6.25e-11	-6.28125e-11	-5.1875e-11	-5.6875e-11	-5.5e-11	-6.4375e-11	-6.53125e-11	-5.75e-11	-6.09375e-11	-7.28125e-11	-5.03125e-11		-3.96875e-11	-4.03125e-11	-4.25e-11	-4.15625e-11	-4.5e-11	-4.03125e-11	-3.96875e-11	-4.25e-11	-4.03125e-11	-4.03125e-11	-4.03125e-11	-3.78125e-11	-4.28125e-11
-7.71875e-11	-6.59375e-11	-7.09375e-11	-5.78125e-11	-5.40625e-11	-5.65625e-11	-5.65625e-11	-6.28125e-11	-6.53125e-11	-6.21875e-11	-6.15625e-11	-7.6875e-11	-6.28125e-11		-4.34375e-11	-4.28125e-11	-4.40625e-11	-3.84375e-11	-4.625e-11	-3.875e-11	-4.28125e-11	-4.125e-11	-4.28125e-11	-4.1875e-11	-3.59375e-11	-4e-11	-4.09375e-11
-7.375e-11	-6.75e-11	-6.78125e-11	-5.9375e-11	-6.03125e-11	-5.8125e-11	-5.53125e-11	-6.34375e-11	-7.15625e-11	-5.65625e-11	-5.6875e-11	-6.46875e-11	-5.78125e-11		-4.46875e-11	-3.46875e-11	-4.46875e-11	-4.1875e-11	-4.40625e-11	-3.59375e-11	-3.71875e-11	-4.59375e-11	-4.46875e-11	-4.15625e-11	-3.59375e-11	-3.6875e-11	-3.8125e-11
-7.6875e-11	-6.3125e-11	-6.25e-11	-6.03125e-11	-5.25e-11	-5.875e-11	-5.03125e-11	-6.46875e-11	-6e-11	-5.9375e-11	-6.3125e-11	-6.4375e-11	-6.0625e-11		-4.5625e-11	-4.25e-11	-4.4375e-11	-3.625e-11	-4.1875e-11	-4.28125e-11	-3.78125e-11	-4.78125e-11	-4.03125e-11	-4.03125e-11	-3.8125e-11	-3.6875e-11	-3.09375e-11
-8.03125e-11	-7.21875e-11	-6.28125e-11	-5.90625e-11	-5.1875e-11	-5.5625e-11	-5.21875e-11	-5.28125e-11	-6.5625e-11	-5.3125e-11	-6e-11	-7e-11	-5.96875e-11		-4.75e-11	-4.34375e-11	-4.5e-11	-3.59375e-11	-4.65625e-11	-4.28125e-11	-4.375e-11	-3.90625e-11	-3.625e-11	-4.1875e-11	-3.75e-11	-3.75e-11	-3.1875e-11
-7.5e-11	-6.9375e-11	-6.84375e-11	-5.34375e-11	-5.78125e-11	-5.96875e-11	-5.71875e-11	-6.125e-11	-7.0625e-11	-5.375e-11	-5.75e-11	-6.84375e-11	-5.4375e-11		-4.75e-11	-3.84375e-11	-4.875e-11	-4.125e-11	-4.4375e-11	-4.03125e-11	-4.09375e-11	-3.625e-11	-4.09375e-11	-3.65625e-11	-3.84375e-11	-3.40625e-11	-3.1875e-11
-7.15625e-11	-6.40625e-11	-6.75e-11	-5.5e-11	-6.09375e-11	-5.5625e-11	-5.65625e-11	-6.59375e-11	-6.6875e-11	-5.34375e-11	-5.5e-11	-7.15625e-11	-5.90625e-11		-4.46875e-11	-4.25e-11	-4.28125e-11	-4.5e-11	-4.0625e-11	-4.40625e-11	-3.9375e-11	-4.1875e-11	-3.875e-11	-3.71875e-11	-4.21875e-11	-4.03125e-11	-3.46875e-11
-7.53125e-11	-7.21875e-11	-6.28125e-11	-5.875e-11	-6.03125e-11	-6.4375e-11	-5.03125e-11	-6.40625e-11	-6.375e-11	-5.6875e-11	-5.84375e-11	-6.34375e-11	-5.5625e-11		-4.15625e-11	-4.34375e-11	-4.53125e-11	-4.3125e-11	-4.3125e-11	-3.875e-11	-4.15625e-11	-4.78125e-11	-3.78125e-11	-3.5e-11	-4.21875e-11	-4.34375e-11	-3.65625e-11
-7.34375e-11	-7e-11	-7.40625e-11	-5.75e-11	-5.40625e-11	-6.03125e-11	-5.625e-11	-5.53125e-11	-7.40625e-11	-5.0625e-11	-6.03125e-11	-6.34375e-11	-5.59375e-11		-4.34375e-11	-4.03125e-11	-4.53125e-11	-3.78125e-11	-4.53125e-11	-4.15625e-11	-4.34375e-11	-4.28125e-11	-4.03125e-11	-3.53125e-11	-3.78125e-11	-4.03125e-11	-4.03125e-11
-7.25e-11	-6.53125e-11	-6.65625e-11	-5.78125e-11	-6.3125e-11	-6e-11	-6.34375e-11	-7.34375e-11	-6.40625e-11	-5.34375e-11	-6.15625e-11	-6.59375e-11	-5.9375e-11		-4.96875e-11	-3.90625e-11	-4.59375e-11	-4.1875e-11	-4.65625e-11	-3.8125e-11	-4.375e-11	-4.375e-11	-3.90625e-11	-3.875e-11	-3.59375e-11	-3.65625e-11	-3.6875e-11
-7.6875e-11	-7.28125e-11	-7e-11	-6.1875e-11	-6.15625e-11	-6.4375e-11	-5.1875e-11	-6.625e-11	-6.8125e-11	-5.5e-11	-6.0625e-11	-6.53125e-11	-5.71875e-11		-4.625e-11	-4.5625e-11	-4.21875e-11	-4.46875e-11	-4.28125e-11	-3.9375e-11	-4.5625e-11	-4.0625e-11	-4.15625e-11	-3.71875e-11	-4.1875e-11	-3.71875e-11	-3.6875e-11
-7.4375e-11	-6.78125e-11	-6.8125e-11	-6.09375e-11	-5.65625e-11	-6.15625e-11	-6.1875e-11	-6.5e-11	-6.21875e-11	-5.84375e-11	-5.46875e-11	-6.96875e-11	-5.90625e-11		-4.3125e-11	-4.46875e-11	-4.40625e-11	-4.25e-11	-4.5625e-11	-4.46875e-11	-4.34375e-11	-3.875e-11	-4.03125e-11	-3.53125e-11	-4.09375e-11	-2.8125e-11	-3.6875e-11
-6.78125e-11	-6.65625e-11	-6.8125e-11	-6.3125e-11	-6.28125e-11	-6.375e-11	-5.375e-11	-6.40625e-11	-6.21875e-11	-6.0625e-11	-6.03125e-11	-6.90625e-11	-5.65625e-11		-4.78125e-11	-4.15625e-11	-4.28125e-11	-3.75e-11	-4.59375e-11	-4.3125e-11	-3.78125e-11	-3.84375e-11	-4.3125e-11	-3.84375e-11	-4.28125e-11	-3.1875e-11	-4.03125e-11
-8.15625e-11	-6.5e-11	-6.4375e-11	-5.5e-11	-5.53125e-11	-5.84375e-11	-4.875e-11	-5.6875e-11	-6.5e-11	-5.40625e-11	-5.46875e-11	-6.5625e-11	-5.65625e-11		-4.28125e-11	-4.0625e-11	-4.5e-11	-3.96875e-11	-4.46875e-11	-4.03125e-11	-4.125e-11	-4.6875e-11	-3.90625e-11	-3.78125e-11	-4.5e-11	-3.96875e-11	-3.875e-11
-7.625e-11	-7e-11	-7.15625e-11	-5.5e-11	-5.5e-11	-5.28125e-11	-5.6875e-11	-6.1875e-11	-6.78125e-11	-5.75e-11	-6.40625e-11	-6.6875e-11	-5.59375e-11		-3.9375e-11	-4.4375e-11	-4.53125e-11	-4.3125e-11	-4.25e-11	-4.03125e-11	-4.03125e-11	-4.65625e-11	-3.65625e-11	-4.46875e-11	-4.21875e-11	-4.03125e-11	-3.90625e-11
-7.5e-11	-6.40625e-11	-6.75e-11	-6.21875e-11	-6.03125e-11	-6.03125e-11	-5.8125e-11	-6.53125e-11	-6.65625e-11	-6e-11	-5.84375e-11	-6.6875e-11	-5.5625e-11		-3.8125e-11	-4.34375e-11	-4.75e-11	-4.3125e-11	-4.09375e-11	-4.125e-11	-4.5e-11	-4.34375e-11	-4.21875e-11	-4.34375e-11	-4.46875e-11	-4.03125e-11	-3.40625e-11
-7.0625e-11	-6.46875e-11	-7.25e-11	-5.5625e-11	-5.28125e-11	-6.03125e-11	-5.28125e-11	-6.3125e-11	-6.46875e-11	-4.9375e-11	-6.09375e-11	-6.25e-11	-5.8125e-11		-4.21875e-11	-3.75e-11	-4.15625e-11	-4.21875e-11	-4.40625e-11	-3.53125e-11	-4.3125e-11	-4.59375e-11	-3.96875e-11	-3.75e-11	-4.1875e-11	-3.4375e-11	-4.0625e-11
-7.78125e-11	-6.59375e-11	-7.25e-11	-5.625e-11	-5.71875e-11	-5.96875e-11	-5.5e-11	-6.5e-11	-6.375e-11	-5.3125e-11	-6.15625e-11	-6.5e-11	-6.21875e-11		-4.90625e-11	-4.53125e-11	-3.71875e-11	-3.84375e-11	-4.5e-11	-3.65625e-11	-4.09375e-11	-4.65625e-11	-4.09375e-11	-3.59375e-11	-4.3125e-11	-3.5e-11	-3.78125e-11
-7.71875e-11	-6.53125e-11	-7e-11	-5.0625e-11	-5.5e-11	-6.09375e-11	-5.09375e-11	-7.0625e-11	-7.03125e-11	-6.1875e-11	-5.78125e-11	-7.15625e-11	-5.03125e-11		-4.65625e-11	-4.5625e-11	-3.78125e-11	-4.125e-11	-4.8125e-11	-4.28125e-11	-3.84375e-11	-4.5625e-11	-3.875e-11	-3.65625e-11	-4.1875e-11	-4.03125e-11	-3.9375e-11
-7.65625e-11	-5.71875e-11	-6.8125e-11	-5.65625e-11	-5.375e-11	-6.15625e-11	-5.78125e-11	-6.1875e-11	-6.09375e-11	-6e-11	-6.28125e-11	-6.5e-11	-6.53125e-11		-4.3125e-11	-3.875e-11	-4.5625e-11	-4.375e-11	-4.40625e-11	-3.59375e-11	-3.625e-11	-4.53125e-11	-3.53125e-11	-3.78125e-11	-3.65625e-11	-4.03125e-11	-3.71875e-11
-7.6875e-11	-5.96875e-11	-7.5e-11	-6.875e-11	-5.53125e-11	-6.5e-11	-5.15625e-11	-6.4375e-11	-6.28125e-11	-6.375e-11	-6.21875e-11	-7e-11	-6.375e-11		-3.75e-11	-4.125e-11	-4.28125e-11	-4.78125e-11	-4.1875e-11	-3.9375e-11	-4.25e-11	-4.09375e-11	-3.53125e-11	-4.125e-11	-3.78125e-11	-3.71875e-11	-3.6875e-11
-8.0625e-11	-6.125e-11	-7e-11	-6.03125e-11	-5.90625e-11	-6.3125e-11	-5.15625e-11	-6.5625e-11	-6.4375e-11	-5.59375e-11	-5.625e-11	-6.84375e-11	-6.21875e-11		-4.03125e-11	-4.28125e-11	-4.59375e-11	-4.34375e-11	-4.59375e-11	-4.125e-11	-4.09375e-11	-3.84375e-11	-4.03125e-11	-3.78125e-11	-3.90625e-11	-4.03125e-11	-3.46875e-11
-6.90625e-11	-6.71875e-11	-6.4375e-11	-5.65625e-11	-5.4375e-11	-5.5e-11	-6.15625e-11	-5.71875e-11	-6.5e-11	-5.46875e-11	-6.21875e-11	-6.34375e-11	-5.90625e-11		-4.15625e-11	-4.46875e-11	-4.6875e-11	-4.34375e-11	-4.71875e-11	-4.375e-11	-3.96875e-11	-4.1875e-11	-4.03125e-11	-3.6875e-11	-4.03125e-11	-3.84375e-11	-3.84375e-11
-7.6875e-11	-6.84375e-11	-6.9375e-11	-6.15625e-11	-5.9375e-11	-5.90625e-11	-5.1875e-11	-6.84375e-11	-5.59375e-11	-5.78125e-11	-6.4375e-11	-6.5625e-11	-6.34375e-11		-4.625e-11	-4.0625e-11	-4.78125e-11	-4.03125e-11	-4.1875e-11	-3.8125e-11	-4.03125e-11	-4.5e-11	-3.40625e-11	-4.0625e-11	-4.03125e-11	-3.5e-11	-3.75e-11
-7.9375e-11	-5.8125e-11	-6.53125e-11	-5.90625e-11	-5.8125e-11	-6.65625e-11	-6.3125e-11	-6.78125e-11	-6.15625e-11	-5.6875e-11	-5.96875e-11	-6.53125e-11	-6.03125e-11		-4.53125e-11	-4.40625e-11	-4.125e-11	-4.09375e-11	-3.84375e-11	-3.78125e-11	-3.8125e-11	-4.5e-11	-3.34375e-11	-3.90625e-11	-3.78125e-11	-3.875e-11	-4.0625e-11
-7.5e-11	-6.0625e-11	-6.09375e-11	-6.21875e-11	-5.75e-11	-5.875e-11	-5.5e-11	-6.09375e-11	-6.125e-11	-5.96875e-11	-6.5e-11	-6.6875e-11	-5.5e-11		-4.40625e-11	-4.5e-11	-3.875e-11	-3.8125e-11	-4.46875e-11	-3.90625e-11	-3.34375e-11	-4.40625e-11	-3.09375e-11	-3.3125e-11	-3.5e-11	-3.9375e-11	-3.90625e-11
-7.5625e-11	-6.59375e-11	-6.53125e-11	-6.5625e-11	-5.4375e-11	-6.40625e-11	-5.15625e-11	-5.5e-11	-6.34375e-11	-5.90625e-11	-6.46875e-11	-6.71875e-11	-6.53125e-11		-4.65625e-11	-4.21875e-11	-4.40625e-11	-3.84375e-11	-4.5e-11	-3.78125e-11	-4.1875e-11	-4.28125e-11	-3.59375e-11	-3.5e-11	-3.59375e-11	-3.71875e-11	-3.75e-11
-7.78125e-11	-7.03125e-11	-7.28125e-11	-6.15625e-11	-5.34375e-11	-6.03125e-11	-5.46875e-11	-6.15625e-11	-6.6875e-11	-5.03125e-11	-6.71875e-11	-6.5e-11	-5.5e-11		-4.46875e-11	-4.5625e-11	-4.4375e-11	-4.125e-11	-4.15625e-11	-3.6875e-11	-4.15625e-11	-4.03125e-11	-4.03125e-11	-4.09375e-11	-3.75e-11	-3.53125e-11	-4.03125e-11
-7.34375e-11	-7.40625e-11	-7e-11	-5.8125e-11	-5.65625e-11	-5.4375e-11	-6e-11	-6.125e-11	-5.71875e-11	-5.5e-11	-5.84375e-11	-6.46875e-11	-6.21875e-11		-3.46875e-11	-4.21875e-11	-3.90625e-11	-4.15625e-11	-4.1875e-11	-3.78125e-11	-3.75e-11	-4.34375e-11	-3.96875e-11	-3.90625e-11	-4.03125e-11	-3.375e-11	-4.21875e-11
-7.5e-11	-6.96875e-11	-6.5e-11	-6.28125e-11	-6.21875e-11	-5.78125e-11	-5.5625e-11	-6.65625e-11	-6.75e-11	-5.09375e-11	-6.84375e-11	-6.28125e-11	-6.40625e-11		-3.65625e-11	-4.5e-11	-4.1875e-11	-3.78125e-11	-4.3125e-11	-4.5e-11	-3.625e-11	-4.28125e-11	-4.28125e-11	-4.03125e-11	-4.15625e-11	-3.96875e-11	-3.71875e-11
-7.5e-11	-6.03125e-11	-6.90625e-11	-5.9375e-11	-5.65625e-11	-5.5e-11	-6.15625e-11	-5.625e-11	-6.03125e-11	-6.3125e-11	-6.53125e-11	-6.875e-11	-5.34375e-11		-4.46875e-11	-4.6875e-11	-4.65625e-11	-4.03125e-11	-4.4375e-11	-3.6875e-11	-3.84375e-11	-4.34375e-11	-4.15625e-11	-3.96875e-11	-4.21875e-11	-3.65625e-11	-4.03125e-11
-8.09375e-11	-7.4375e-11	-6.0625e-11	-6.03125e-11	-5.3125e-11	-5.65625e-11	-5.78125e-11	-5.84375e-11	-6.3125e-11	-5.9375e-11	-6.78125e-11	-6.65625e-11	-5.65625e-11		-4.4375e-11	-4.34375e-11	-4.03125e-11	-4.21875e-11	-4.78125e-11	-3.34375e-11	-3.875e-11	-4.09375e-11	-3.78125e-11	-4.03125e-11	-3.9375e-11	-3.75e-11	-3.8125e-11
-7.59375e-11	-6.625e-11	-6.9375e-11	-5.96875e-11	-4.96875e-11	-6.09375e-11	-5.65625e-11	-6.40625e-11	-6.3125e-11	-5.9375e-11	-6.4375e-11	-6.625e-11	-6.4375e-11		-4.03125e-11	-4.375e-11	-3.9375e-11	-3.5625e-11	-4.59375e-11	-4.03125e-11	-4.09375e-11	-3.875e-11	-3.6875e-11	-4.09375e-11	-4.09375e-11	-3.71875e-11	-4.28125e-11
-7.625e-11	-6.5625e-11	-6.75e-11	-6.15625e-11	-5.59375e-11	-5.28125e-11	-5.53125e-11	-6.5625e-11	-6.65625e-11	-5.84375e-11	-6.21875e-11	-6.40625e-11	-5.59375e-11		-4.34375e-11	-4.1875e-11	-4.625e-11	-4.34375e-11	-4.375e-11	-4.0625e-11	-4.5e-11	-4.5e-11	-3.8125e-11	-3.90625e-11	-4.03125e-11	-3.90625e-11	-3.8125e-11
-7.1875e-11	-6.4375e-11	-6.4375e-11	-5.90625e-11	-5.28125e-11	-5.90625e-11	-5.28125e-11	-6.03125e-11	-6.1875e-11	-5.9375e-11	-7.1875e-11	-6.6875e-11	-5.90625e-11		-4.34375e-11	-4.78125e-11	-4.5e-11	-4.28125e-11	-4.5e-11	-3.6875e-11	-4.40625e-11	-4.09375e-11	-4.125e-11	-3.78125e-11	-4.03125e-11	-3.9375e-11	-3.65625e-11
-7.21875e-11	-7.125e-11	-6.375e-11	-5.5625e-11	-6.75e-11	-5.875e-11	-5.84375e-11	-6.65625e-11	-6.53125e-11	-6.34375e-11	-6.03125e-11	-6.90625e-11	-6e-11		-4.28125e-11	-3.5e-11	-4.59375e-11	-4.40625e-11	-4.375e-11	-4.3125e-11	-3.75e-11	-4.15625e-11	-4.0625e-11	-3.90625e-11	-3.34375e-11	-3.6875e-11	-4.09375e-11
-7.84375e-11	-6.28125e-11	-6.46875e-11	-6e-11	-6.28125e-11	-6.71875e-11	-4.75e-11	-5.6875e-11	-6.5e-11	-6.03125e-11	-6.09375e-11	-6.46875e-11	-5.90625e-11		-4.1875e-11	-3.3125e-11	-4.65625e-11	-4.0625e-11	-4.90625e-11	-4.46875e-11	-4.03125e-11	-3.84375e-11	-4.09375e-11	-3.875e-11	-3.4375e-11	-4.1875e-11	-3.875e-11
-7.6875e-11	-6.65625e-11	-7.46875e-11	-5.84375e-11	-5.46875e-11	-5.65625e-11	-5.5625e-11	-6.28125e-11	-6.6875e-11	-5.5e-11	-5.375e-11	-6.34375e-11	-4.75e-11		-4.375e-11	-4.03125e-11	-4.125e-11	-4.40625e-11	-4.53125e-11	-4.65625e-11	-4.09375e-11	-4.21875e-11	-3.5e-11	-4.1875e-11	-3.78125e-11	-3.90625e-11	-3.59375e-11
-8.28125e-11	-6.28125e-11	-7.09375e-11	-6.1875e-11	-5.46875e-11	-5.21875e-11	-5.59375e-11	-5.78125e-11	-6.09375e-11	-5.03125e-11	-6.1875e-11	-6.15625e-11	-6.3125e-11		-4.125e-11	-4.15625e-11	-4.03125e-11	-4.4375e-11	-4.09375e-11	-4.28125e-11	-4.15625e-11	-4.40625e-11	-3.65625e-11	-3.84375e-11	-4.25e-11	-3.8125e-11	-3.5625e-11
-7.9375e-11	-6.96875e-11	-6.65625e-11	-5.21875e-11	-5.625e-11	-5.78125e-11	-5.53125e-11	-6.5e-11	-6.125e-11	-5.34375e-11	-5.96875e-11	-6.625e-11	-4.9375e-11		-4.46875e-11	-4.65625e-11	-4.34375e-11	-4.03125e-11	-4.21875e-11	-3.90625e-11	-4.28125e-11	-4.59375e-11	-3.78125e-11	-3.5e-11	-3.84375e-11	-4.03125e-11	-3.6875e-11
-7.8125e-11	-6.78125e-11	-6.75e-11	-5.40625e-11	-6.28125e-11	-6.09375e-11	-5.28125e-11	-6.15625e-11	-6.21875e-11	-6.46875e-11	-5.34375e-11	-6.15625e-11	-5.78125e-11		-4.46875e-11	-4.875e-11	-4.0625e-11	-3.9375e-11	-3.84375e-11	-3.78125e-11	-4.34375e-11	-5e-11	-3.53125e-11	-3.46875e-11	-3.4375e-11	-3.5625e-11	-4.15625e-11
-7.25e-11	-6e-11	-7.28125e-11	-5.53125e-11	-5.15625e-11	-4.9375e-11	-4.71875e-11	-6.25e-11	-6.125e-11	-6.03125e-11	-6.59375e-11	-6.1875e-11	-5.375e-11		-4.15625e-11	-4.71875e-11	-4.09375e-11	-4.03125e-11	-3.5e-11	-3.375e-11	-4.03125e-11	-4.125e-11	-3.34375e-11	-3.9375e-11	-3.3125e-11	-3.875e-11	-3.9375e-11
-7.0625e-11	-6.59375e-11	-6.46875e-11	-5.96875e-11	-6.78125e-11	-5.5e-11	-6.28125e-11	-6.1875e-11	-6.625e-11	-5.40625e-11	-6.375e-11	-6.71875e-11	-6.0625e-11		-3.90625e-11	-4.53125e-11	-4.59375e-11	-4.15625e-11	-4.1875e-11	-3.59375e-11	-3.53125e-11	-3.875e-11	-3.4375e-11	-3.6875e-11	-3.65625e-11	-3.78125e-11	-3.40625e-11
-7.3125e-11	-6.5e-11	-7.28125e-11	-6.15625e-11	-5.40625e-11	-5.65625e-11	-5.5e-11	-6.1875e-11	-6.65625e-11	-5.84375e-11	-6.53125e-11	-7.03125e-11	-5.90625e-11		-4.03125e-11	-4.21875e-11	-4.71875e-11	-3.96875e-11	-4.53125e-11	-3.90625e-11	-3.65625e-11	-4.3125e-11	-3.78125e-11	-3.71875e-11	-4.0625e-11	-3.625e-11	-3.90625e-11
-7.5625e-11	-6.65625e-11	-6.90625e-11	-6.09375e-11	-5.65625e-11	-5.65625e-11	-5.5e-11	-6.875e-11	-6.28125e-11	-6.03125e-11	-6.15625e-11	-6.84375e-11	-6.09375e-11		-4.15625e-11	-4.375e-11	-4.375e-11	-3.875e-11	-4.28125e-11	-3.625e-11	-4.0625e-11	-4.5e-11	-4.59375e-11	-3.78125e-11	-4.03125e-11	-3.46875e-11	-3.6875e-11
-7.125e-11	-6.4375e-11	-7.03125e-11	-6.5e-11	-6.03125e-11	-6e-11	-5.53125e-11	-6.21875e-11	-6.28125e-11	-5.625e-11	-5.84375e-11	-6.21875e-11	-5.5e-11		-4.28125e-11	-5e-11	-4.625e-11	-3.71875e-11	-4.5e-11	-4.28125e-11	-4.28125e-11	-4.1875e-11	-4.03125e-11	-3.6875e-11	-4.40625e-11	-3.625e-11	-3.84375e-11
-7.71875e-11	-6.28125e-11	-6.65625e-11	-5.46875e-11	-6.28125e-11	-5.65625e-11	-5.90625e-11	-6.1875e-11	-6.1875e-11	-5.75e-11	-5.78125e-11	-7.4375e-11	-5.65625e-11		-4.1875e-11	-4.3125e-11	-5e-11	-4.09375e-11	-4.125e-11	-4.15625e-11	-4.03125e-11	-4.03125e-11	-3.6875e-11	-3.6875e-11	-4.21875e-11	-3.90625e-11	-4.15625e-11
-7.53125e-11	-6.28125e-11	-6.5625e-11	-6.4375e-11	-6.53125e-11	-5.84375e-11	-5.53125e-11	-5.5625e-11	-6.03125e-11	-5.71875e-11	-6.03125e-11	-6.90625e-11	-5.90625e-11		-4.53125e-11	-3.875e-11	-4.40625e-11	-4.03125e-11	-4.15625e-11	-4.21875e-11	-3.65625e-11	-4.1875e-11	-3.71875e-11	-3.9375e-11	-3.71875e-11	-3.84375e-11	-3.9375e-11
-7.875e-11	-6.59375e-11	-6.40625e-11	-5.8125e-11	-5.78125e-11	-5.78125e-11	-6.125e-11	-6.46875e-11	-6.15625e-11	-5.65625e-11	-6.15625e-11	-6.90625e-11	-5.6875e-11		-4.15625e-11	-3.46875e-11	-4.78125e-11	-4e-11	-4.5e-11	-3.53125e-11	-3.78125e-11	-3.875e-11	-4.03125e-11	-4.09375e-11	-4.03125e-11	-3.46875e-11	-3.8125e-11
-7.34375e-11	-7.28125e-11	-6.53125e-11	-5.5e-11	-6.15625e-11	-6.25e-11	-5.71875e-11	-5e-11	-6.4375e-11	-6.0625e-11	-5.5e-11	-6.96875e-11	-5.625e-11		-4.125e-11	-4.09375e-11	-4.40625e-11	-3.78125e-11	-4.59375e-11	-3.625e-11	-4.15625e-11	-3.8125e-11	-4.03125e-11	-3.75e-11	-3.78125e-11	-3.59375e-11	-4.0625e-11
-7.9375e-11	-6.28125e-11	-6.8125e-11	-6.15625e-11	-5.65625e-11	-5.5e-11	-5.875e-11	-6.125e-11	-5.96875e-11	-5.90625e-11	-6.28125e-11	-6.09375e-11	-5.78125e-11		-4.21875e-11	-4.375e-11	-4.40625e-11	-4.40625e-11	-3.90625e-11	-4.15625e-11	-4.5625e-11	-4.125e-11	-4.46875e-11	-4.09375e-11	-3.09375e-11	-4.1875e-11	-3.46875e-11
-7.875e-11	-6.59375e-11	-6.59375e-11	-5.96875e-11	-5.84375e-11	-6.5625e-11	-5.5e-11	-6.5625e-11	-5.34375e-11	-5.65625e-11	-6.1875e-11	-6.53125e-11	-5.59375e-11		-4.4375e-11	-4.15625e-11	-4.8125e-11	-4.15625e-11	-3.78125e-11	-4.0625e-11	-4.21875e-11	-4.59375e-11	-4.6875e-11	-3.65625e-11	-3.46875e-11	-3.65625e-11	-3.53125e-11
-7.21875e-11	-6.53125e-11	-6.6875e-11	-6.09375e-11	-5.6875e-11	-6.28125e-11	-5.46875e-11	-5.84375e-11	-6.59375e-11	-5.3125e-11	-6.3125e-11	-6.09375e-11	-5.78125e-11		-4.46875e-11	-4.46875e-11	-4.25e-11	-4.4375e-11	-4.09375e-11	-4.03125e-11	-4.03125e-11	-4.03125e-11	-3.40625e-11	-4.21875e-11	-4.03125e-11	-3.6875e-11	-3.09375e-11
-7.78125e-11	-7.03125e-11	-7e-11	-5.875e-11	-6.15625e-11	-5.96875e-11	-4.90625e-11	-6.03125e-11	-5.78125e-11	-4.53125e-11	-5.90625e-11	-6.40625e-11	-5.59375e-11		-3.8125e-11	-4.40625e-11	-3.84375e-11	-4.59375e-11	-4.90625e-11	-4.5e-11	-4.40625e-11	-4.53125e-11	-3.375e-11	-4.40625e-11	-4.0625e-11	-3.96875e-11	-3.65625e-11
-8.71875e-11	-6.71875e-11	-6.78125e-11	-5.53125e-11	-5.65625e-11	-5.375e-11	-5.125e-11	-6.125e-11	-5.96875e-11	-5.5e-11	-5.84375e-11	-6.53125e-11	-6.15625e-11		-4.09375e-11	-4.75e-11	-4.65625e-11	-4.3125e-11	-4.96875e-11	-4.53125e-11	-4.09375e-11	-4.96875e-11	-4.03125e-11	-4.28125e-11	-4.03125e-11	-3.875e-11	-3.59375e-11
-7.53125e-11	-6.46875e-11	-6.90625e-11	-5.96875e-11	-5.875e-11	-6.84375e-11	-5.0625e-11	-5.46875e-11	-5.46875e-11	-5.53125e-11	-6.71875e-11	-6.5e-11	-5.9375e-11		-4.5e-11	-4.875e-11	-4.1875e-11	-4.5e-11	-4.1875e-11	-3.5e-11	-4.0625e-11	-4.21875e-11	-4.03125e-11	-4.21875e-11	-3.5e-11	-3.59375e-11	-4.03125e-11
-7.28125e-11	-6.03125e-11	-7.0625e-11	-6.40625e-11	-5.5e-11	-5.8125e-11	-5.65625e-11	-6.09375e-11	-5.65625e-11	-5.28125e-11	-5.59375e-11	-6.03125e-11	-5.53125e-11		-4.53125e-11	-4.53125e-11	-4.34375e-11	-4.4375e-11	-4.25e-11	-4.03125e-11	-3.8125e-11	-4.03125e-11	-4.15625e-11	-4.59375e-11	-3.875e-11	-3.78125e-11	-3.46875e-11
-7.5625e-11	-5.625e-11	-6.5e-11	-5.6875e-11	-5.75e-11	-6.28125e-11	-5.96875e-11	-6.1875e-11	-6.46875e-11	-5.6875e-11	-5.96875e-11	-6.3125e-11	-5.8125e-11		-4.34375e-11	-4.5625e-11	-4.40625e-11	-4.8125e-11	-4.40625e-11	-4.65625e-11	-4.09375e-11	-4.03125e-11	-4.03125e-11	-4.09375e-11	-4.15625e-11	-3.59375e-11	-3.3125e-11
-7.84375e-11	-6.1875e-11	-7.03125e-11	-5.59375e-11	-4.625e-11	-6.59375e-11	-5.21875e-11	-6.0625e-11	-6.46875e-11	-5.125e-11	-6e-11	-5.84375e-11	-5.34375e-11		-4.21875e-11	-4.21875e-11	-4.09375e-11	-4.4375e-11	-4.1875e-11	-4.375e-11	-4.03125e-11	-4.28125e-11	-3.875e-11	-3.90625e-11	-4.34375e-11	-3.59375e-11	-3.5625e-11
-7.0625e-11	-6.25e-11	-6.59375e-11	-5.65625e-11	-5.53125e-11	-6.375e-11	-5.3125e-11	-6.15625e-11	-6e-11	-5.21875e-11	-6.4375e-11	-5.59375e-11	-5.53125e-11		-4.46875e-11	-4.09375e-11	-4.40625e-11	-3.9375e-11	-4.09375e-11	-4.15625e-11	-3.875e-11	-4.4375e-11	-4.09375e-11	-3.78125e-11	-4.0625e-11	-3.65625e-11	-3.9375e-11
-7.03125e-11	-6.46875e-11	-7.5625e-11	-6.15625e-11	-5.25e-11	-6.09375e-11	-5.4375e-11	-5.59375e-11	-6.46875e-11	-5.6875e-11	-6.375e-11	-6.59375e-11	-5.28125e-11		-4.1875e-11	-3.875e-11	-4.21875e-11	-4.09375e-11	-4.375e-11	-3.84375e-11	-4.46875e-11	-4.40625e-11	-4.09375e-11	-3.96875e-11	-3.5625e-11	-3.625e-11	-3.5625e-11
-7.78125e-11	-6.21875e-11	-6.90625e-11	-6.15625e-11	-5.6875e-11	-5.75e-11	-5.8125e-11	-5.90625e-11	-6.03125e-11	-5.25e-11	-6.40625e-11	-6.46875e-11	-5.65625e-11		-4.375e-11	-4.1875e-11	-4.1875e-11	-3.84375e-11	-4.03125e-11	-3.9375e-11	-4.59375e-11	-4.375e-11	-3.71875e-11	-3.53125e-11	-4.09375e-11	-3.8125e-11	-4.125e-11
-7.75e-11	-6.6875e-11	-6.875e-11	-5.8125e-11	-6.03125e-11	-5.96875e-11	-5.40625e-11	-6.15625e-11	-6.9375e-11	-5.6875e-11	-6.1875e-11	-6.3125e-11	-5.65625e-11		-4.46875e-11	-4.5e-11	-4.4375e-11	-3.75e-11	-4.5e-11	-4.1875e-11	-4.28125e-11	-4.4375e-11	-3.59375e-11	-3.90625e-11	-3.53125e-11	-3.46875e-11	-3.78125e-11
-7.59375e-11	-6.46875e-11	-6.59375e-11	-6.1875e-11	-4.96875e-11	-6.125e-11	-4.84375e-11	-6.15625e-11	-5.375e-11	-5.78125e-11	-6.125e-11	-6.03125e-11	-5.375e-11		-4.03125e-11	-4.40625e-11	-4.1875e-11	-3.78125e-11	-4.46875e-11	-4.34375e-11	-3.78125e-11	-3.90625e-11	-4.09375e-11	-4.28125e-11	-3.9375e-11	-3.375e-11	-3.84375e-11
-7.75e-11	-6.1875e-11	-6.46875e-11	-5.875e-11	-5.625e-11	-6.03125e-11	-5.125e-11	-5.9375e-11	-6.25e-11	-6e-11	-5.71875e-11	-6e-11	-5.65625e-11		-3.9375e-11	-4.375e-11	-4.71875e-11	-4.625e-11	-3.84375e-11	-4.125e-11	-4.125e-11	-4.65625e-11	-4.5e-11	-4.375e-11	-4.09375e-11	-3.34375e-11	-3.96875e-11
-7.15625e-11	-6.34375e-11	-6.90625e-11	-6.21875e-11	-5.59375e-11	-6.4375e-11	-5e-11	-6.46875e-11	-6.75e-11	-5.28125e-11	-6.4375e-11	-6.46875e-11	-5.625e-11		-4.34375e-11	-4.40625e-11	-4.71875e-11	-4.28125e-11	-3.71875e-11	-4.0625e-11	-4.34375e-11	-4.5625e-11	-4.46875e-11	-4.09375e-11	-4.15625e-11	-3.25e-11	-3.53125e-11
-7.15625e-11	-6.90625e-11	-6.65625e-11	-5.28125e-11	-5.875e-11	-6.375e-11	-5.375e-11	-6.21875e-11	-6.3125e-11	-5.28125e-11	-6.53125e-11	-6.5625e-11	-5.375e-11		-4.625e-11	-4.5625e-11	-3.9375e-11	-3.65625e-11	-3.78125e-11	-4.15625e-11	-4.21875e-11	-3.9375e-11	-3.53125e-11	-3.28125e-11	-4.28125e-11	-3.71875e-11	-3.28125e-11
-7.28125e-11	-5.8125e-11	-6.59375e-11	-6.09375e-11	-5.78125e-11	-6.5e-11	-5.5625e-11	-6.28125e-11	-6.28125e-11	-5.125e-11	-6.46875e-11	-6.21875e-11	-5.40625e-11		-4.65625e-11	-4.375e-11	-4.3125e-11	-4.0625e-11	-3.65625e-11	-3.75e-11	-4.1875e-11	-4.4375e-11	-3.5e-11	-3.71875e-11	-4.15625e-11	-3.75e-11	-3.71875e-11
-7.1875e-11	-6.15625e-11	-6.90625e-11	-6.375e-11	-6.0625e-11	-6.34375e-11	-5.375e-11	-5.71875e-11	-6.0625e-11	-5.09375e-11	-5.90625e-11	-6.53125e-11	-5.5e-11		-4.6875e-11	-4.28125e-11	-4.15625e-11	-4.125e-11	-3.84375e-11	-4.0625e-11	-3.46875e-11	-4.5e-11	-3.90625e-11	-3.96875e-11	-3.59375e-11	-3.875e-11	-3.5625e-11
-6.78125e-11	-6.4375e-11	-6.84375e-11	-6.0625e-11	-5.9375e-11	-6.71875e-11	-5.5e-11	-5.90625e-11	-5.96875e-11	-5.1875e-11	-5.65625e-11	-6.1875e-11	-4.875e-11		-4.4375e-11	-3.875e-11	-4.375e-11	-4.1875e-11	-3.6875e-11	-4.21875e-11	-3.4375e-11	-4.0625e-11	-3.96875e-11	-4.15625e-11	-3.84375e-11	-4.1875e-11	-3.875e-11
-7.03125e-11	-6.53125e-11	-6.90625e-11	-5.6875e-11	-6.03125e-11	-6.59375e-11	-5.71875e-11	-6.09375e-11	-6.5e-11	-5.65625e-11	-5.625e-11	-6.34375e-11	-5.5e-11		-3.78125e-11	-4.15625e-11	-3.84375e-11	-3.8125e-11	-3.96875e-11	-3.78125e-11	-4.03125e-11	-3.6875e-11	-3.9375e-11	-4.28125e-11	-4.125e-11	-3.71875e-11	-4.21875e-11
-7.375e-11	-6.90625e-11	-6.96875e-11	-5.9375e-11	-5.5625e-11	-6.25e-11	-5.5e-11	-5.90625e-11	-6.375e-11	-5.65625e-11	-6.3125e-11	-5.59375e-11	-5.28125e-11		-4.40625e-11	-4.40625e-11	-4.34375e-11	-3.90625e-11	-4.90625e-11	-3.53125e-11	-4.65625e-11	-3.96875e-11	-3.78125e-11	-4.28125e-11	-3.5625e-11	-4.03125e-11	-3.875e-11
-7.09375e-11	-6.5625e-11	-6.8125e-11	-6.1875e-11	-6e-11	-6.5e-11	-5.625e-11	-6.40625e-11	-6.6875e-11	-5.09375e-11	-5.5e-11	-6.75e-11	-5.46875e-11		-4.125e-11	-4.34375e-11	-4.25e-11	-4.46875e-11	-5.03125e-11	-4.03125e-11	-3.9375e-11	-4.09375e-11	-3.5e-11	-4.28125e-11	-3.78125e-11	-4.28125e-11	-3.78125e-11
-7.46875e-11	-7.15625e-11	-6.875e-11	-6.53125e-11	-5.6875e-11	-6.15625e-11	-5.65625e-11	-6.34375e-11	-6.4375e-11	-5.75e-11	-5.8125e-11	-6.375e-11	-5.375e-11		-4.6875e-11	-4.28125e-11	-4.71875e-11	-4.65625e-11	-4.53125e-11	-4.28125e-11	-3.5e-11	-4.15625e-11	-4.15625e-11	-3.65625e-11	-3.75e-11	-3.71875e-11	-3.90625e-11
-7.6875e-11	-7.09375e-11	-6.6875e-11	-5.875e-11	-5.75e-11	-6.4375e-11	-5.625e-11	-5.9375e-11	-6.09375e-11	-5.65625e-11	-6.34375e-11	-7.375e-11	-5.65625e-11		-4.4375e-11	-4.46875e-11	-4.46875e-11	-4.5e-11	-4.15625e-11	-4.09375e-11	-4.03125e-11	-4.375e-11	-4.0625e-11	-3.65625e-11	-3.875e-11	-3.375e-11	-3.9375e-11
-7.4375e-11	-6.71875e-11	-6.5e-11	-6.3125e-11	-6.09375e-11	-6.3125e-11	-5.96875e-11	-6.34375e-11	-6.09375e-11	-6e-11	-6.0625e-11	-6.03125e-11	-5.875e-11		-4.28125e-11	-4.125e-11	-4.5625e-11	-4.15625e-11	-4.3125e-11	-3.78125e-11	-4.4375e-11	-4.6875e-11	-3.34375e-11	-3.75e-11	-3.71875e-11	-3.3125e-11	-3.5625e-11
-7.09375e-11	-6.96875e-11	-6.90625e-11	-6.34375e-11	-6.34375e-11	-6.71875e-11	-5.21875e-11	-6.40625e-11	-6.40625e-11	-5.5625e-11	-6.125e-11	-6.40625e-11	-5.5625e-11		-4.5e-11	-4.15625e-11	-4.25e-11	-4.0625e-11	-4.125e-11	-3.875e-11	-4.28125e-11	-4.46875e-11	-3.53125e-11	-3.78125e-11	-3.65625e-11	-3.28125e-11	-3.6875e-11
-7.46875e-11	-6.9375e-11	-6.34375e-11	-6.59375e-11	-5.3125e-11	-6.125e-11	-6.3125e-11	-5.65625e-11	-6.5e-11	-5.03125e-11	-5.71875e-11	-5.84375e-11	-5.5625e-11		-4.84375e-11	-4.40625e-11	-3.875e-11	-4.03125e-11	-4.15625e-11	-3.5e-11	-3.9375e-11	-4.5e-11	-4.03125e-11	-3.65625e-11	-3.65625e-11	-3.65625e-11	-3.84375e-11
-6.96875e-11	-6.6875e-11	-7.59375e-11	-5.4375e-11	-6.09375e-11	-6.5e-11	-5.03125e-11	-6.3125e-11	-6.53125e-11	-5.5e-11	-5.53125e-11	-7e-11	-4.9375e-11		-4.125e-11	-4.40625e-11	-4.46875e-11	-4.40625e-11	-4.5e-11	-3.8125e-11	-3.78125e-11	-4.3125e-11	-4.21875e-11	-4.03125e-11	-3.53125e-11	-4.09375e-11	-3.65625e-11
-6.96875e-11	-6.59375e-11	-6.03125e-11	-6.25e-11	-6.03125e-11	-5.96875e-11	-5.34375e-11	-5.96875e-11	-6.40625e-11	-5.5625e-11	-5.53125e-11	-6.0625e-11	-5.875e-11		-3.75e-11	-4.21875e-11	-4.4375e-11	-4.03125e-11	-4.59375e-11	-4.1875e-11	-4.15625e-11	-3.875e-11	-4.25e-11	-3.8125e-11	-3.9375e-11	-3.875e-11	-3.71875e-11
-8.15625e-11	-6.78125e-11	-7.1875e-11	-5.96875e-11	-5.9375e-11	-5.9375e-11	-6.4375e-11	-6.625e-11	-5.78125e-11	-5.625e-11	-5.71875e-11	-6.5625e-11	-5.96875e-11		-4.40625e-11	-4.03125e-11	-4.375e-11	-4.125e-11	-4.21875e-11	-4.375e-11	-4.53125e-11	-4.21875e-11	-4.09375e-11	-3.9375e-11	-3.90625e-11	-4.03125e-11	-3.53125e-11
-7.90625e-11	-6.78125e-11	-6.28125e-11	-6.75e-11	-6.09375e-11	-6.0625e-11	-5.40625e-11	-6.65625e-11	-6.1875e-11	-5.5e-11	-6.03125e-11	-6.78125e-11	-6e-11		-4.34375e-11	-4.375e-11	-4.4375e-11	-4.15625e-11	-4.03125e-11	-4.03125e-11	-4.28125e-11	-4.53125e-11	-3.53125e-11	-3.78125e-11	-3.78125e-11	-4.5e-11	-3.5625e-11
-6.90625e-11	-6.5625e-11	-7.28125e-11	-5.9375e-11	-5.625e-11	-5.40625e-11	-6.25e-11	-5.9375e-11	-6.1875e-11	-6.03125e-11	-5.78125e-11	-6.53125e-11	-5.15625e-11		-4.375e-11	-4.5625e-11	-4.90625e-11	-4.09375e-11	-3.78125e-11	-3.75e-11	-4.03125e-11	-4.21875e-11	-4.15625e-11	-3.96875e-11	-3.90625e-11	-3.78125e-11	-3.59375e-11
-8.15625e-11	-6.03125e-11	-7.5e-11	-6.15625e-11	-6.28125e-11	-5.9375e-11	-6.03125e-11	-6.59375e-11	-6.90625e-11	-5.53125e-11	-5.90625e-11	-6.34375e-11	-5.5625e-11		-4.5e-11	-4.0625e-11	-3.9375e-11	-4.1875e-11	-4.0625e-11	-3.90625e-11	-3.84375e-11	-4.03125e-11	-3.90625e-11	-4.03125e-11	-4.0625e-11	-4.03125e-11	-3.9375e-11
-6.59375e-11	-6.75e-11	-6.9375e-11	-6e-11	-6.40625e-11	-6.46875e-11	-5.71875e-11	-5.71875e-11	-6.78125e-11	-5.28125e-11	-5.9375e-11	-6.53125e-11	-6.0625e-11		-4.15625e-11	-3.90625e-11	-4.03125e-11	-4.25e-11	-4.71875e-11	-3.96875e-11	-4.28125e-11	-3.96875e-11	-3.625e-11	-4.25e-11	-4.1875e-11	-3.84375e-11	-3.78125e-11
-7.46875e-11	-6.75e-11	-6.8125e-11	-6.21875e-11	-6.46875e-11	-6.59375e-11	-5.875e-11	-5.9375e-11	-7.75e-11	-5.15625e-11	-5.40625e-11	-6.71875e-11	-5.28125e-11		-3.84375e-11	-3.78125e-11	-4.1875e-11	-4.0625e-11	-4.46875e-11	-4.21875e-11	-4.125e-11	-4.28125e-11	-4.0625e-11	-4.15625e-11	-3.9375e-11	-3.75e-11	-3.21875e-11
-7.21875e-11	-6.9375e-11	-6.71875e-11	-5.9375e-11	-6.03125e-11	-5.90625e-11	-5.15625e-11	-5.84375e-11	-6e-11	-5.5e-11	-6.03125e-11	-6.59375e-11	-5.90625e-11		-3.84375e-11	-4.03125e-11	-3.96875e-11	-4.1875e-11	-4.4375e-11	-4.3125e-11	-4.09375e-11	-4.09375e-11	-4.03125e-11	-4.125e-11	-4.1875e-11	-4.0625e-11	-3.21875e-11
-7.59375e-11	-6.15625e-11	-7.3125e-11	-5.65625e-11	-6.375e-11	-5.90625e-11	-5.3125e-11	-6.3125e-11	-6.28125e-11	-5e-11	-6e-11	-6.5e-11	-5.84375e-11		-4.875e-11	-4.3125e-11	-4.8125e-11	-4.28125e-11	-4.28125e-11	-3.6875e-11	-3.84375e-11	-4.28125e-11	-3.375e-11	-3.6875e-11	-4.09375e-11	-3.5e-11	-3.5e-11
-7.6875e-11	-7.8125e-11	-6.8125e-11	-5.75e-11	-6.3125e-11	-6.59375e-11	-5.40625e-11	-5.90625e-11	-6.65625e-11	-5.9375e-11	-6.34375e-11	-6.3125e-11	-5.15625e-11		-4.40625e-11	-4.46875e-11	-4.21875e-11	-4.375e-11	-4.03125e-11	-3.5625e-11	-4.03125e-11	-4.4375e-11	-3.5e-11	-4.21875e-11	-3.96875e-11	-3.3125e-11	-3.65625e-11
-7.46875e-11	-7e-11	-6.84375e-11	-6.34375e-11	-5.84375e-11	-6.25e-11	-5.65625e-11	-5.8125e-11	-5.90625e-11	-5.78125e-11	-6.15625e-11	-6.78125e-11	-5.96875e-11		-3.8125e-11	-4.625e-11	-3.75e-11	-4.28125e-11	-4.03125e-11	-3.84375e-11	-3.9375e-11	-4.28125e-11	-3.53125e-11	-3.8125e-11	-3.5e-11	-3.78125e-11	-3.6875e-11
-7.53125e-11	-6.65625e-11	-7e-11	-5.96875e-11	-6.125e-11	-6.6875e-11	-5.65625e-11	-6.0625e-11	-6.1875e-11	-5.28125e-11	-6.1875e-11	-6.125e-11	-5.59375e-11		-3.90625e-11	-4.125e-11	-4.0625e-11	-4.0625e-11	-4.28125e-11	-3.78125e-11	-4.0625e-11	-4.34375e-11	-3.78125e-11	-4.15625e-11	-3.96875e-11	-3.84375e-11	-3.875e-11
-6.96875e-11	-7.53125e-11	-6.6875e-11	-5.34375e-11	-5.65625e-11	-5.96875e-11	-5.46875e-11	-6.21875e-11	-6.28125e-11	-5.4375e-11	-6.6875e-11	-7.1875e-11	-5.21875e-11		-4.0625e-11	-4.34375e-11	-3.75e-11	-4.25e-11	-4.15625e-11	-4.1875e-11	-3.875e-11	-4.4375e-11	-4.03125e-11	-4.03125e-11	-3.53125e-11	-3.15625e-11	-4.375e-11
-7.15625e-11	-6.96875e-11	-7.28125e-11	-5.96875e-11	-5.84375e-11	-6.3125e-11	-5.46875e-11	-6.78125e-11	-6.09375e-11	-5.28125e-11	-6.125e-11	-6.3125e-11	-4.8125e-11		-3.9375e-11	-4.1875e-11	-3.46875e-11	-4.09375e-11	-4.125e-11	-4.46875e-11	-3.71875e-11	-4.15625e-11	-4.1875e-11	-4.03125e-11	-3.75e-11	-3.65625e-11	-4.71875e-11
-8.03125e-11	-6.0625e-11	-6.5e-11	-6.53125e-11	-6.59375e-11	-6.34375e-11	-5.5e-11	-6.40625e-11	-5.6875e-11	-5.84375e-11	-6.0625e-11	-7.15625e-11	-5.375e-11		-4.34375e-11	-4.03125e-11	-4.09375e-11	-3.875e-11	-4.25e-11	-4.375e-11	-4.40625e-11	-4.5625e-11	-4.1875e-11	-4.03125e-11	-3.90625e-11	-4.0625e-11	-3.53125e-11
-7.3125e-11	-6.40625e-11	-6.5e-11	-6.5625e-11	-6.4375e-11	-6.1875e-11	-5.15625e-11	-6.3125e-11	-5.8125e-11	-6.09375e-11	-5.5e-11	-6.28125e-11	-5.40625e-11		-4.40625e-11	-4.03125e-11	-4.03125e-11	-4.3125e-11	-4.1875e-11	-4.15625e-11	-4.03125e-11	-4.1875e-11	-4.3125e-11	-3.5e-11	-3.875e-11	-3.78125e-11	-3.21875e-11
-8.03125e-11	-6.71875e-11	-7.40625e-11	-5.6875e-11	-5.71875e-11	-6.5625e-11	-5.78125e-11	-5.90625e-11	-6.375e-11	-5.5e-11	-5.40625e-11	-6.8125e-11	-5.71875e-11		-4.28125e-11	-4.5625e-11	-3.9375e-11	-3.90625e-11	-4.71875e-11	-4.03125e-11	-4.03125e-11	-4.65625e-11	-4.5625e-11	-3.625e-11	-4.28125e-11	-3.5e-11	-3.5625e-11
-7.40625e-11	-6.78125e-11	-6.59375e-11	-6e-11	-5.84375e-11	-6.65625e-11	-6.125e-11	-6.9375e-11	-5.5e-11	-5.5625e-11	-6.15625e-11	-6.84375e-11	-5.09375e-11		-4.40625e-11	-4.15625e-11	-4.1875e-11	-4.375e-11	-4.3125e-11	-4.65625e-11	-4.25e-11	-4.65625e-11	-4.875e-11	-3.8125e-11	-4.03125e-11	-3.5e-11	-3.71875e-11
-7.34375e-11	-6.5e-11	-7.03125e-11	-5.8125e-11	-4.8125e-11	-6.40625e-11	-5.9375e-11	-6.15625e-11	-5.875e-11	-5.34375e-11	-5.84375e-11	-7e-11	-5.3125e-11		-4.5e-11	-4.46875e-11	-4.71875e-11	-4.1875e-11	-4.5e-11	-3.90625e-11	-4.28125e-11	-4.21875e-11	-4.15625e-11	-3.78125e-11	-3.40625e-11	-3.65625e-11	-3.8125e-11
-7.5e-11	-6.6875e-11	-7.25e-11	-5.875e-11	-5.90625e-11	-6.53125e-11	-6.09375e-11	-6.46875e-11	-5.96875e-11	-5.96875e-11	-5.78125e-11	-6.40625e-11	-4.96875e-11		-4.34375e-11	-4.25e-11	-5e-11	-4.03125e-11	-5.25e-11	-3.96875e-11	-4.34375e-11	-3.96875e-11	-4.125e-11	-4.03125e-11	-3.78125e-11	-4.09375e-11	-3.8125e-11
-7.8125e-11	-7.15625e-11	-7.1875e-11	-6.6875e-11	-5.65625e-11	-6e-11	-5.21875e-11	-6.0625e-11	-5.625e-11	-5.3125e-11	-5.8125e-11	-6.125e-11	-4.9375e-11		-3.5625e-11	-4.28125e-11	-5.03125e-11	-4.21875e-11	-4.4375e-11	-3.75e-11	-3.9375e-11	-3.59375e-11	-3.5e-11	-4.1875e-11	-3.5625e-11	-3.71875e-11	-3.5625e-11
-6.9375e-11	-6.96875e-11	-7.0625e-11	-5.90625e-11	-5.46875e-11	-6.21875e-11	-5.40625e-11	-6.46875e-11	-6.21875e-11	-5.25e-11	-6.5e-11	-7.40625e-11	-5e-11		-3.90625e-11	-4.40625e-11	-4.78125e-11	-3.90625e-11	-4.28125e-11	-4.3125e-11	-4.21875e-11	-4.21875e-11	-3.84375e-11	-4.28125e-11	-3.34375e-11	-4.03125e-11	-3.9375e-11
-7.53125e-11	-6.84375e-11	-6.875e-11	-6.71875e-11	-5.9375e-11	-5.90625e-11	-5.46875e-11	-6.8125e-11	-6.625e-11	-5.53125e-11	-5.71875e-11	-7.09375e-11	-5.5e-11		-4.09375e-11	-4.46875e-11	-3.78125e-11	-4.3125e-11	-4.34375e-11	-4.34375e-11	-3.875e-11	-3.90625e-11	-4.28125e-11	-4.03125e-11	-3.34375e-11	-3.5625e-11	-3.96875e-11
-8.28125e-11	-6.8125e-11	-7e-11	-5.9375e-11	-5.40625e-11	-5.71875e-11	-5.5e-11	-6.78125e-11	-6.25e-11	-5.84375e-11	-6.21875e-11	-7e-11	-5.5e-11		-4.40625e-11	-4.09375e-11	-4.15625e-11	-4.03125e-11	-4.1875e-11	-4.03125e-11	-3.5625e-11	-4.03125e-11	-3.96875e-11	-4.03125e-11	-3.9375e-11	-3.84375e-11	-3.65625e-11
-7.875e-11	-6.59375e-11	-7.4375e-11	-5.34375e-11	-5.4375e-11	-6.53125e-11	-5.03125e-11	-5.6875e-11	-6.40625e-11	-5.53125e-11	-5.90625e-11	-6.4375e-11	-5.59375e-11		-4.875e-11	-4.25e-11	-4.21875e-11	-3.5e-11	-4.28125e-11	-3.8125e-11	-3.96875e-11	-4.0625e-11	-3.71875e-11	-3.84375e-11	-3.8125e-11	-3.90625e-11	-3.6875e-11
-7.84375e-11	-6.71875e-11	-6.34375e-11	-6.21875e-11	-6.0625e-11	-6.09375e-11	-5.15625e-11	-6.4375e-11	-6.5e-11	-6.34375e-11	-6.5625e-11	-6.9375e-11	-5.5625e-11		-4.46875e-11	-4.65625e-11	-4.03125e-11	-3.96875e-11	-4.4375e-11	-3.84375e-11	-4e-11	-4.40625e-11	-3.4375e-11	-4.28125e-11	-3.78125e-11	-3.65625e-11	-3.53125e-11
-8.0625e-11	-6.53125e-11	-7.15625e-11	-6.28125e-11	-5.21875e-11	-6.53125e-11	-5.46875e-11	-6.03125e-11	-6.53125e-11	-6.0625e-11	-6.53125e-11	-6.71875e-11	-5.4375e-11		-4.375e-11	-4.59375e-11	-3.84375e-11	-4.25e-11	-3.9375e-11	-3.59375e-11	-3.90625e-11	-4.84375e-11	-4.0625e-11	-4.59375e-11	-3.4375e-11	-3.78125e-11	-3.90625e-11
-7.90625e-11	-6.71875e-11	-6.6875e-11	-5.53125e-11	-5.34375e-11	-5.84375e-11	-5.5e-11	-5.625e-11	-5.84375e-11	-5.84375e-11	-5.46875e-11	-6.84375e-11	-5.5e-11		-3.96875e-11	-3.90625e-11	-4.15625e-11	-4.09375e-11	-4.40625e-11	-3.875e-11	-4.21875e-11	-4.71875e-11	-4.1875e-11	-4.03125e-11	-3.90625e-11	-3.65625e-11	-3.8125e-11
-7.59375e-11	-7e-11	-7.375e-11	-6.15625e-11	-5.78125e-11	-6.21875e-11	-5.46875e-11	-5.71875e-11	-5.78125e-11	-5.84375e-11	-5.96875e-11	-6.46875e-11	-5.53125e-11		-4.1875e-11	-4.625e-11	-4.40625e-11	-3.6875e-11	-4.25e-11	-3.8125e-11	-4.09375e-11	-4.53125e-11	-4.34375e-11	-4.09375e-11	-4.03125e-11	-3.6875e-11	-4.03125e-11
-7.40625e-11	-6.65625e-11	-6.6875e-11	-6.0625e-11	-5.09375e-11	-6.46875e-11	-5.25e-11	-6.625e-11	-6.46875e-11	-5.46875e-11	-6.34375e-11	-7.21875e-11	-5.625e-11		-4.15625e-11	-4.28125e-11	-4.4375e-11	-3.875e-11	-4.28125e-11	-4.03125e-11	-3.5e-11	-3.78125e-11	-4.34375e-11	-4.03125e-11	-4.125e-11	-3.90625e-11	-3.40625e-11
-7.21875e-11	-6.625e-11	-7.15625e-11	-5.96875e-11	-5.90625e-11	-5.90625e-11	-5.75e-11	-6.5e-11	-7e-11	-5.59375e-11	-5.53125e-11	-6.90625e-11	-5.15625e-11		-4.125e-11	-4.46875e-11	-4.09375e-11	-3.65625e-11	-4.21875e-11	-4.40625e-11	-4.03125e-11	-4.3125e-11	-4.15625e-11	-3.8125e-11	-4.0625e-11	-3.90625e-11	-3.78125e-11
-7.53125e-11	-6.90625e-11	-7.625e-11	-6.53125e-11	-5.8125e-11	-5.96875e-11	-5.75e-11	-6.65625e-11	-6.78125e-11	-5.875e-11	-5.75e-11	-6.0625e-11	-5.96875e-11		-3.96875e-11	-4.59375e-11	-4.40625e-11	-4.28125e-11	-3.90625e-11	-4.65625e-11	-4.25e-11	-4.59375e-11	-3.65625e-11	-4.15625e-11	-3.6875e-11	-4.03125e-11	-4e-11
-7.5e-11	-6.46875e-11	-7.28125e-11	-5.5625e-11	-6.78125e-11	-6.28125e-11	-5.1875e-11	-6.0625e-11	-5.96875e-11	-4.9375e-11	-5.5625e-11	-7.15625e-11	-5.40625e-11		-4.25e-11	-4.6875e-11	-4.15625e-11	-4.46875e-11	-4.53125e-11	-4.53125e-11	-4.34375e-11	-4.28125e-11	-4.21875e-11	-3.84375e-11	-3.71875e-11	-3.71875e-11	-3.53125e-11
-7.5625e-11	-6.90625e-11	-7.09375e-11	-6.75e-11	-5.8125e-11	-5.71875e-11	-5.03125e-11	-5.625e-11	-5.90625e-11	-6.28125e-11	-5.78125e-11	-6.75e-11	-5.65625e-11		-4.21875e-11	-4.6875e-11	-3.78125e-11	-4.03125e-11	-4.34375e-11	-4.21875e-11	-4.1875e-11	-4.125e-11	-4.03125e-11	-3.53125e-11	-4.03125e-11	-3.8125e-11	-3.59375e-11
-7.90625e-11	-6.9375e-11	-7.25e-11	-5.78125e-11	-6.5e-11	-6.46875e-11	-5.59375e-11	-6.84375e-11	-6.59375e-11	-6.5e-11	-5.5625e-11	-5.75e-11	-6.09375e-11		-4.03125e-11	-4.28125e-11	-3.90625e-11	-3.78125e-11	-4.03125e-11	-3.78125e-11	-4.25e-11	-4.34375e-11	-3.8125e-11	-3.65625e-11	-4.03125e-11	-3.5e-11	-3.9375e-11
-7.90625e-11	-6.96875e-11	-7.65625e-11	-5.8125e-11	-5.5e-11	-6.59375e-11	-5.25e-11	-6.78125e-11	-6.0625e-11	-5.4375e-11	-6.15625e-11	-7.3125e-11	-5.90625e-11		-3.875e-11	-4.03125e-11	-3.71875e-11	-4.28125e-11	-4.1875e-11	-3.6875e-11	-4.25e-11	-4.21875e-11	-3.90625e-11	-3.71875e-11	-3.84375e-11	-3.71875e-11	-4.59375e-11
-7.65625e-11	-6.4375e-11	-7.4375e-11	-6.3125e-11	-6.15625e-11	-5.90625e-11	-4.9375e-11	-6.21875e-11	-6.25e-11	-6.09375e-11	-6.03125e-11	-6.96875e-11	-5.375e-11		-4.5e-11	-4.125e-11	-4.28125e-11	-4.34375e-11	-4.03125e-11	-3.59375e-11	-3.8125e-11	-4.28125e-11	-3.71875e-11	-3.5625e-11	-4.125e-11	-3.78125e-11	-4.28125e-11
-8.15625e-11	-6.96875e-11	-6.625e-11	-6.34375e-11	-6.375e-11	-5.5625e-11	-5.3125e-11	-6.09375e-11	-6.875e-11	-6.46875e-11	-5.78125e-11	-6.46875e-11	-5.40625e-11		-4.5625e-11	-4.21875e-11	-4.28125e-11	-4.25e-11	-4.28125e-11	-3.625e-11	-4.09375e-11	-4.28125e-11	-3.59375e-11	-3.71875e-11	-4.15625e-11	-4.28125e-11	-3.34375e-11
-7.65625e-11	-7.375e-11	-6.84375e-11	-6.09375e-11	-6.03125e-11	-6.28125e-11	-5.5e-11	-7.34375e-11	-5.59375e-11	-4.65625e-11	-6.1875e-11	-6.875e-11	-5.59375e-11		-4.46875e-11	-4.15625e-11	-4.53125e-11	-3.875e-11	-4.03125e-11	-3.90625e-11	-3.84375e-11	-4.34375e-11	-3.5625e-11	-4.125e-11	-3.53125e-11	-3.78125e-11	-3.6875e-11
-7.84375e-11	-6.375e-11	-6.84375e-11	-6.0625e-11	-5.21875e-11	-5.6875e-11	-5.5e-11	-6.34375e-11	-6.53125e-11	-5.65625e-11	-6.3125e-11	-5.875e-11	-5.125e-11		-4.65625e-11	-4.40625e-11	-4.4375e-11	-3.9375e-11	-4.28125e-11	-4.65625e-11	-4.09375e-11	-4.25e-11	-3.84375e-11	-3.53125e-11	-3.9375e-11	-3.875e-11	-3.625e-11
-7.0625e-11	-6.71875e-11	-7.03125e-11	-6.34375e-11	-6e-11	-5.34375e-11	-5.65625e-11	-6.03125e-11	-6.375e-11	-5.3125e-11	-6.0625e-11	-7.3125e-11	-4.9375e-11		-4.46875e-11	-4.9375e-11	-4.5e-11	-3.875e-11	-4.5625e-11	-4.5625e-11	-3.8125e-11	-4.03125e-11	-3.90625e-11	-3.90625e-11	-3.6875e-11	-3.90625e-11	-4.03125e-11
-8.0625e-11	-6.5625e-11	-6.40625e-11	-6.375e-11	-5.0625e-11	-5.90625e-11	-6.34375e-11	-6.65625e-11	-6.28125e-11	-5.53125e-11	-5.875e-11	-6.625e-11	-5.40625e-11		-3.875e-11	-4.5625e-11	-4.71875e-11	-4.21875e-11	-4.21875e-11	-4.0625e-11	-3.8125e-11	-4.25e-11	-3.78125e-11	-3.71875e-11	-3.5625e-11	-3.75e-11	-4.3125e-11
-7.09375e-11	-6.03125e-11	-6.78125e-11	-6.4375e-11	-5.78125e-11	-5.84375e-11	-5.15625e-11	-6.59375e-11	-6.34375e-11	-5.90625e-11	-6.21875e-11	-6.375e-11	-5.4375e-11		-4.3125e-11	-4.6875e-11	-3.4375e-11	-4.5e-11	-4.53125e-11	-3.84375e-11	-4.15625e-11	-3.6875e-11	-4.25e-11	-3.71875e-11	-4.34375e-11	-3.75e-11	-3.9375e-11
-8.15625e-11	-5.46875e-11	-6.5625e-11	-7.09375e-11	-5.84375e-11	-6.4375e-11	-5.4375e-11	-6.3125e-11	-5.875e-11	-5.59375e-11	-5.8125e-11	-6.4375e-11	-5.40625e-11		-4.59375e-11	-4.75e-11	-3.5e-11	-3.90625e-11	-3.71875e-11	-3.59375e-11	-3.75e-11	-4.21875e-11	-4.40625e-11	-3.65625e-11	-4.71875e-11	-3.90625e-11	-3.71875e-11
-7.90625e-11	-6.21875e-11	-6.5e-11	-6.375e-11	-5.875e-11	-6.53125e-11	-5.5625e-11	-5.90625e-11	-5.5625e-11	-5.9375e-11	-6.0625e-11	-6.78125e-11	-5.78125e-11		-4.40625e-11	-4.125e-11	-3.71875e-11	-4.15625e-11	-4.21875e-11	-3.28125e-11	-4.0625e-11	-4.46875e-11	-4.03125e-11	-3.96875e-11	-3.65625e-11	-4.03125e-11	-4.09375e-11
-7.8125e-11	-6.9375e-11	-6.53125e-11	-6.5625e-11	-5.46875e-11	-6.03125e-11	-5.5e-11	-6.5e-11	-6.03125e-11	-5.5e-11	-6.4375e-11	-7.21875e-11	-5.65625e-11		-4.59375e-11	-3.96875e-11	-3.6875e-11	-4.4375e-11	-4.40625e-11	-3.75e-11	-3.9375e-11	-3.75e-11	-4.34375e-11	-3.59375e-11	-3.78125e-11	-3.78125e-11	-4.40625e-11
-7.6875e-11	-5.71875e-11	-7.125e-11	-5.8125e-11	-5.78125e-11	-6.5e-11	-5.4375e-11	-6e-11	-5.84375e-11	-5.9375e-11	-6.59375e-11	-6.53125e-11	-5.4375e-11		-4.5e-11	-4.59375e-11	-4.03125e-11	-3.875e-11	-4.625e-11	-4.15625e-11	-4.125e-11	-4e-11	-3.875e-11	-3.53125e-11	-4.34375e-11	-3.59375e-11	-4.15625e-11
-7.28125e-11	-6.21875e-11	-7.34375e-11	-5.9375e-11	-6e-11	-5.6875e-11	-5.28125e-11	-6e-11	-6.03125e-11	-6.0625e-11	-6.46875e-11	-6.5e-11	-5.5e-11		-4.03125e-11	-4.28125e-11	-4.8125e-11	-3.75e-11	-4.1875e-11	-3.84375e-11	-4.625e-11	-4.71875e-11	-3.90625e-11	-3.75e-11	-4.28125e-11	-3.46875e-11	-4.03125e-11
-8.625e-11	-6.34375e-11	-6.375e-11	-5.1875e-11	-5.375e-11	-6.0625e-11	-5.46875e-11	-5.96875e-11	-6.375e-11	-5.875e-11	-5.1875e-11	-7.125e-11	-5.25e-11		-4.59375e-11	-4.46875e-11	-4.375e-11	-4.15625e-11	-4.3125e-11	-4.4375e-11	-4.15625e-11	-4.5625e-11	-3.75e-11	-4.0625e-11	-3.34375e-11	-3.90625e-11	-3.375e-11
-7.5625e-11	-6.90625e-11	-6.65625e-11	-6.09375e-11	-5.28125e-11	-6.34375e-11	-5.59375e-11	-6.53125e-11	-6.3125e-11	-5.28125e-11	-5.6875e-11	-7.15625e-11	-5e-11		-3.90625e-11	-4.25e-11	-4.03125e-11	-4.0625e-11	-4.3125e-11	-4.0625e-11	-3.8125e-11	-4.46875e-11	-4.09375e-11	-4.03125e-11	-3.53125e-11	-4.125e-11	-4.21875e-11
-7.875e-11	-6.90625e-11	-6.53125e-11	-5.9375e-11	-5.6875e-11	-5.78125e-11	-5.625e-11	-6.59375e-11	-6.03125e-11	-5.71875e-11	-6.46875e-11	-6.90625e-11	-6.34375e-11		-3.8125e-11	-4.03125e-11	-4.1875e-11	-3.4375e-11	-4.46875e-11	-4.4375e-11	-3.65625e-11	-4.25e-11	-3.59375e-11	-4.28125e-11	-3.65625e-11	-3.90625e-11	-3.34375e-11
-7.25e-11	-6.03125e-11	-6.875e-11	-6e-11	-5.5e-11	-5.65625e-11	-5.65625e-11	-6.15625e-11	-6.09375e-11	-5.9375e-11	-6.125e-11	-6.625e-11	-5.21875e-11		-4.25e-11	-4.46875e-11	-4.5e-11	-3.5625e-11	-4.40625e-11	-3.75e-11	-4.3125e-11	-3.875e-11	-4.0625e-11	-4.03125e-11	-3.9375e-11	-3.46875e-11	-3.40625e-11
-7.71875e-11	-6.4375e-11	-6.84375e-11	-5.21875e-11	-5.4375e-11	-6.71875e-11	-5.5625e-11	-5.875e-11	-6.03125e-11	-5.3125e-11	-6.3125e-11	-5.9375e-11	-6.15625e-11		-4.125e-11	-4.46875e-11	-4.15625e-11	-4.03125e-11	-3.84375e-11	-3.78125e-11	-4.0625e-11	-3.84375e-11	-4.03125e-11	-3.53125e-11	-4.25e-11	-3.875e-11	-3.40625e-11
-7.75e-11	-6.84375e-11	-7.03125e-11	-6.28125e-11	-5.875e-11	-5.625e-11	-5.5e-11	-6.09375e-11	-6.5e-11	-5.40625e-11	-6.46875e-11	-6.96875e-11	-6.28125e-11		-4.5625e-11	-4.875e-11	-3.9375e-11	-3.90625e-11	-3.3125e-11	-3.625e-11	-3.8125e-11	-4.5625e-11	-3.9375e-11	-4.125e-11	-4.15625e-11	-4.125e-11	-3.4375e-11
-7.625e-11	-6.625e-11	-6.71875e-11	-6.0625e-11	-5.65625e-11	-5.59375e-11	-5.46875e-11	-6.125e-11	-6.3125e-11	-5.03125e-11	-6.3125e-11	-6.28125e-11	-6.53125e-11		-4.75e-11	-4.3125e-11	-4.0625e-11	-4.34375e-11	-4.125e-11	-4.3125e-11	-4.21875e-11	-4.40625e-11	-3.78125e-11	-4.46875e-11	-3.71875e-11	-3.65625e-11	-3.96875e-11
-7.6875e-11	-6.53125e-11	-6.71875e-11	-6.40625e-11	-5.3125e-11	-6.53125e-11	-5.6875e-11	-6.5e-11	-5.90625e-11	-5.9375e-11	-6.15625e-11	-6.53125e-11	-6.53125e-11		-4.71875e-11	-4.84375e-11	-4.0625e-11	-4.1875e-11	-4.34375e-11	-4.15625e-11	-4.15625e-11	-4.375e-11	-3.875e-11	-4.03125e-11	-4.03125e-11	-4.15625e-11	-4.4375e-11
-8.03125e-11	-6.625e-11	-7e-11	-6.1875e-11	-5.84375e-11	-5.59375e-11	-5.28125e-11	-5.875e-11	-6.46875e-11	-4.78125e-11	-5.75e-11	-6.4375e-11	-6.1875e-11		-4.5e-11	-4.8125e-11	-4.53125e-11	-3.6875e-11	-4.46875e-11	-4.03125e-11	-3.90625e-11	-4.34375e-11	-4.1875e-11	-4.3125e-11	-4.03125e-11	-3.71875e-11	-3.5e-11
-8.59375e-11	-6.46875e-11	-6.59375e-11	-6.1875e-11	-5.46875e-11	-6.75e-11	-5.40625e-11	-6.53125e-11	-6.3125e-11	-6.15625e-11	-6.21875e-11	-7.28125e-11	-6e-11		-4.84375e-11	-4.6875e-11	-4.65625e-11	-4.25e-11	-4.40625e-11	-3.65625e-11	-4.25e-11	-4.03125e-11	-4.09375e-11	-3.875e-11	-4.15625e-11	-3.78125e-11	-3.46875e-11
-7.375e-11	-5.84375e-11	-7.125e-11	-5.84375e-11	-6.03125e-11	-6.0625e-11	-5.09375e-11	-5.96875e-11	-6.6875e-11	-5.4375e-11	-5.84375e-11	-6.0625e-11	-5.71875e-11		-4.125e-11	-4.53125e-11	-4.28125e-11	-4.03125e-11	-4.1875e-11	-3.46875e-11	-3.84375e-11	-4.28125e-11	-3.90625e-11	-4.15625e-11	-4.1875e-11	-3.625e-11	-3.6875e-11
-7.65625e-11	-7.0625e-11	-6.65625e-11	-5.40625e-11	-6.28125e-11	-6.5e-11	-6.09375e-11	-6.75e-11	-6.15625e-11	-6.1875e-11	-5.71875e-11	-6.65625e-11	-6.09375e-11		-3.90625e-11	-3.78125e-11	-4.21875e-11	-4.40625e-11	-4.21875e-11	-4.03125e-11	-4.125e-11	-4.09375e-11	-3.65625e-11	-3.71875e-11	-3.84375e-11	-3.65625e-11	-3.65625e-11
-7.1875e-11	-5.96875e-11	-7.25e-11	-5.5625e-11	-5.34375e-11	-6.65625e-11	-5.9375e-11	-6.34375e-11	-6.21875e-11	-5.59375e-11	-6.59375e-11	-6.03125e-11	-6.3125e-11		-4.28125e-11	-4.375e-11	-3.65625e-11	-4.25e-11	-4.5e-11	-3.75e-11	-4.28125e-11	-4.03125e-11	-3.90625e-11	-3.625e-11	-3.84375e-11	-3.59375e-11	-3.59375e-11
-7.59375e-11	-6.65625e-11	-7.15625e-11	-5.40625e-11	-5.5e-11	-5.84375e-11	-5.34375e-11	-6.40625e-11	-5.46875e-11	-5.34375e-11	-5.9375e-11	-6.21875e-11	-5.9375e-11		-3.09375e-11	-4.5e-11	-3.78125e-11	-4.03125e-11	-4.5e-11	-3.78125e-11	-3.5625e-11	-4.125e-11	-4.53125e-11	-3.75e-11	-3.90625e-11	-3.9375e-11	-3.65625e-11
-7.9375e-11	-7.03125e-11	-6.65625e-11	-6.0625e-11	-5.875e-11	-6.15625e-11	-5.78125e-11	-5.84375e-11	-5.4375e-11	-6.15625e-11	-5.65625e-11	-7e-11	-6.46875e-11		-4.03125e-11	-4.46875e-11	-4.28125e-11	-4.40625e-11	-4.03125e-11	-4.0625e-11	-4.125e-11	-3.875e-11	-3.875e-11	-4.3125e-11	-3.875e-11	-4.375e-11	-4.09375e-11
-7.59375e-11	-6.8125e-11	-7.15625e-11	-6.25e-11	-5.09375e-11	-6.65625e-11	-5.71875e-11	-6.3125e-11	-6.03125e-11	-5.75e-11	-6.875e-11	-6.6875e-11	-5.34375e-11		-4.71875e-11	-4.1875e-11	-4.1875e-11	-4.15625e-11	-4.09375e-11	-4.15625e-11	-3.96875e-11	-3.9375e-11	-4.15625e-11	-4.25e-11	-3.875e-11	-3.875e-11	-3.75e-11
-7.78125e-11	-6.84375e-11	-7e-11	-5.875e-11	-5.5625e-11	-5.75e-11	-5.375e-11	-5.8125e-11	-5.25e-11	-5.71875e-11	-5.78125e-11	-6.53125e-11	-5.9375e-11		-4.28125e-11	-4.6875e-11	-4.0625e-11	-3.65625e-11	-4.40625e-11	-4.15625e-11	-3.875e-11	-4.21875e-11	-4.1875e-11	-4.03125e-11	-4.03125e-11	-3.15625e-11	-3.5625e-11
-7.59375e-11	-6.4375e-11	-6.28125e-11	-6.71875e-11	-6.15625e-11	-5.65625e-11	-5.4375e-11	-6.03125e-11	-6.59375e-11	-5.28125e-11	-6.34375e-11	-6.3125e-11	-5.90625e-11		-4.625e-11	-4.6875e-11	-4.0625e-11	-3.8125e-11	-3.9375e-11	-3.90625e-11	-3.90625e-11	-4.21875e-11	-4.3125e-11	-3.65625e-11	-3.71875e-11	-3.90625e-11	-3.3125e-11
-7.21875e-11	-6.15625e-11	-6.46875e-11	-6e-11	-5.4375e-11	-6.59375e-11	-5.875e-11	-6.8125e-11	-5.84375e-11	-5.5e-11	-5.59375e-11	-6.375e-11	-6.0625e-11		-4.59375e-11	-4.59375e-11	-4.1875e-11	-3.90625e-11	-4.25e-11	-4.34375e-11	-4.03125e-11	-4.28125e-11	-4.15625e-11	-3.9375e-11	-3.875e-11	-4.34375e-11	-3.5e-11
-7.625e-11	-6.78125e-11	-6.96875e-11	-6.59375e-11	-4.9375e-11	-5.84375e-11	-5.75e-11	-6.5e-11	-5.75e-11	-5.4375e-11	-6.15625e-11	-6.875e-11	-5.84375e-11		-3.5625e-11	-4.78125e-11	-4.59375e-11	-4.21875e-11	-4.5625e-11	-4.28125e-11	-3.96875e-11	-3.96875e-11	-3.90625e-11	-4.0625e-11	-3.5e-11	-4.03125e-11	-3.78125e-11
[truncated: 24,766 more rows]
