# Supplementary material for: Discovery and characterization of Hv1-type proton channels in reef-building corals
Source: eLife. 2021 Aug 6;10:e69248. doi: 10.7554/eLife.69248 (PMC8346283; doi:10.7554/eLife.69248)
Supplement: Figure 6—source data 1. [file elife-69248-fig6-data1.xlsx]

## Sheet: Figure 6 Source data
Figure 6A
	Delta pH 2				Delta pH 1				Delta pH 0.5			Delta pH -1
voltage (mV)	Mean conductance	SEM conductance		voltage (mV)	Mean conductance	SEM conductance		voltage (mV)	Mean conductance		voltage (mV)	Mean conductance	SEM conductance
-100	-0.000198184	0.00014053		-100	0.00155025	0.00051314		-100	0.00230797		20	0.00014828	7.73952e-05
-80	6.55279e-05	4.61335e-05		-80	-0.0037755	0.00171113		-80	-0.00385512		40	-0.000607482	0.000319529
-60	0.0104598	0.00117931		-60	-0.0132192	0.0385743		-60	-0.00328742		60	-0.0069085	0.00360225
-40	0.180581	0.0469688		-50	0.00159138	0.00565773		-40	0.0125839		80	0.0212979	0.00988868
-20	0.456797	0.0935642		-40	0.000710767	0.00256112		-20	-0.0322847		100	0.160379	0.0505999
0	0.635749	0.09625		-30	0.0152798	0.0105846		0	-0.0138943		120	0.425898	0.0817177
20	0.742724	0.0784159		-20	0.0383545	0.0182523		20	0.096847		140	0.695549	0.0761514
40	0.81595	0.0573319		-10	0.218245	0.0642272		40	0.47936		160	0.874036	0.0542814
60	0.872168	0.0392435		0	0.280619	0.0402035		60	0.761558		180	0.95604	0.0321854
80	0.920491	0.0237509		10	0.521846	0.0579605		80	0.886831		200	1	2.75302e-07
100	0.960865	0.00930567		20	0.595426	0.039276		100	0.946659
120	1	2.98023e-08		30	0.725782	0.0390966		120	0.981811
				40	0.79051	0.0345525		140	1
				50	0.854561	0.0246236
				60	0.89352	0.0252158
				70	0.937001	0.0141496
				80	0.949461	0.0162184
				90	0.987679	0.00465559
				100	0.978569	0.0080519
				120	0.982625	0.00894819
				140	0.969325	0.0250458
Figure 6 B			Simulation				Figure 6 B					Simulation
			Delta pH	V-half								Delta pH	V-half
Delta pH	V-half		-5	172.433			Delta pH	V-half	SEM V-half	V-thr	SEM Vtrh
			-4.5	172.406								-5	172.433
-1	125.87		-4	172.322			-2	156.406	12.8931	111.81	4.92	-4.5	172.406
0.5	42.28		-3.5	172.056			-1	146.31	11.6186	95.07	12.09	-4	172.322
1	12.27		-3	171.235			0	26.9	2.39538	11.19	4.34	-3.5	172.056
2	-13.36		-2.5	168.804			1	8.24222	8.01448	-32.8	2.56	-3	171.235
			-2	162.379			2	-6.162	6.10353	-35.36	4.14	-2.5	168.804
			-1.5	148.879								-2	162.379
			-1	127.884								-1.5	148.879
			-0.5	102.308								-1	127.884
			0	75.0757								-0.5	102.308
			0.5	48.1636								0	75.0757
			1	23.7916								0.5	48.1636
			1.5	5.17851								1	23.7916
			2	-5.59887								1.5	5.17851
			2.5	-10.273								2	-5.59887
			3	-11.9538								2.5	-10.273
			3.5	-12.5098								3	-11.9538
			4	-12.6882								3.5	-12.5098
			4.5	-12.7449								4	-12.6882
			5	-12.7628								4.5	-12.7449
			5.5	-12.7685								5	-12.7628
			6	-12.7703								5.5	-12.7685
			6.5	-12.7709								6	-12.7703
			7	-12.7711								6.5	-12.7709
			7.5	-12.7711								7	-12.7711
			8	-12.7711								7.5	-12.7711
			8.5	-12.7711								8	-12.7711
			9	-12.7711								8.5	-12.7711
			9.5	-12.7711								9	-12.7711
												9.5	-12.7711
