# Supplementary material for: Discovery and characterization of Hv1-type proton channels in reef-building corals
Source: eLife. 2021 Aug 6;10:e69248. doi: 10.7554/eLife.69248 (PMC8346283; doi:10.7554/eLife.69248)
Supplement: Figure 8—source data 1. [file elife-69248-fig8-data1.xlsx]

## Sheet: Figure 8 Source data
Figure 8B										Figure 8 C				Figure 8 D
Voltage (mV)	Normalized current no Zn		SEM	Normalized current w/ Zn		SEM	Fraction blocked			Normalized current	time (sec)			Zn2+ concentration (M)	Fraction blocked	SEM
-80	-0.0292161		0.00377985	-0.0166366		0.00685234				1	0			1e-05	0.394772	0.0782144
-60	-0.0316169		0.0054097	-0.0164427		0.00650049				1.00751	5			0.0001	0.654	0.0225
-40	-0.0113026		0.0107992	-0.00717957		0.00613562				1.01034	10			0.001	0.892	0.0215
-20	-0.0226201		0.00821404	-0.0112535		0.00480467				1.02128	15			0.01	0.960906	0.010554
0	0.0162149		0.018907	-0.00731488		0.00599748	0.794817			1.02025	20
20	0.187444		0.0570984	0.0423744		0.0258961	0.727634			1.01008	25
40	0.380844		0.0668301	0.134652		0.0444469	0.631058			1.0177	30
60	0.571397		0.0446103	0.254733		0.0369998	0.54818			0.718032	35
80	0.733027		0.042723	0.381026		0.0370296	0.478299			0.08823	40
100	0.890949		0.063363	0.500957		0.0354982	0.437499			0.0898276	45
120	0.879616		0.020013	0.606247		0.0233095	0.314634			0.0890418	50
140	1		0	0.711004		0.0158455	0.293015			0.0908697	55
										0.090262	60
										0.0861617	65
										0.0896478	70
										0.0896188	75
										0.951285	80
										1.01027	85
										1.0185	90
										1.02206	95
										1.00847	100
										1.00449	105
